# Supplementary material
Source: publisher figshare collection journal article supplement (https://gsapubs.figshare.com/ndownloader/files/23319677)
Supplement: Supplementary file 1 [file 23319677]

## Sheet: Sheet1
TABLE DR7.SINGLE CRYSTAL LASER FUSION 40Ar/39Ar DATA
	ID	Power (Watts)	40Ar/39Ar	37Ar/39Ar	36Ar/39Ar (x 10-3)	39ArK (x 10-15 mol)	K/Ca	40Ar* (%)	Age (Ma)	±1σ (Ma)								Run_ID	Sample	System	Run_Date	Run_Hour	Run_SecSince1904	PrincipalInvestigator	Material	Hole #	Project	Locality	File	Version	History	Comment	Fit_Type	Signal Norm.	Run Script	Fract_Deliv_To_MS	Heating_Dev	Pwr_Requested	Pwr_Achieved	Pwr_AchievedSD	Pwr_AchievedMax	OP_Temp	Tot_Dur_Heating	Dur_Heating_At_Req_Pwr	Holes	X_Y_Pos	Laser Scan File	Beam_Dia	Ar41_
	CM-SS4, Sanidine, J=0.0091944±0.01%, IC=1.051596±0.0010175, NM-258E, Lab#=61750, Argus VI
X	53	4	3.98298	0.0023525	0.00729248	0.827136	216.877	99.9503	65.6823	0.0921168								61750-53	CM-SS4B	37	2013-07-13	4.65	3456535000		Sanidine	33	Iain Mason	Cuba Mesa	129.138.12.160	7.875	H2 Baseline = A @ 7/15/13 12:20 PM; H1 Baseline = A @ 7/15/13 12:20 PM; AX Baseline = A @ 7/15/13 12:20 PM; L1 Baseline = A @ 7/15/13 12:20 PM; L2 Baseline = A @ 7/15/13 12:20 PM; CDD Baseline = A @ 7/15/13 12:20 PM; Ar41 = L @ 7/15/13 12:20 PM; Ar40 = P @ 7/15/13 12:20 PM; Ar39 = P @ 7/15/13 12:20 PM; Ar38 = L @ 7/15/13 12:20 PM; Ar37 = L @ 7/15/13 12:20 PM; Ar36 = P @ 7/15/13 12:20 PM; Ar40 bk …	80-100 Mesh #, Curtail	APPLLPAAAAAA	1	Pychron Script	1	Fusions CO2	4	4	0	4	0	30	30	174			0	-0.0268172
	66	4	4.21337	0.0035672	0.0117	1.3197	143.026	99.9255	69.4006	0.0588968								61750-66	CM-SS4B	37	2013-07-13	9.06667	3456551000		Sanidine	33	Iain Mason	Cuba Mesa	129.138.12.160	7.875	Ar40 bk val,er = @ 7/17/13 2:26 PM @ argonlab; Parabolic @ 7/17/13 2:26 PM @ argonlab; Ar39 bk val,er = @ 7/17/13 2:26 PM @ argonlab; Average background @ 7/17/13 2:26 PM @ argonlab; Ar38 bk val,er = @ 7/17/13 2:26 PM @ argonlab; Average background @ 7/17/13 2:26 PM @ argonlab; Ar37 bk val,er = @ 7/17/13 2:26 PM @ argonlab; Average background @ 7/17/13 2:26 PM @ argonlab; Ar36 bk val,er = @ 7/17/…	80-100 Mesh #, Curtail	APPLLPAAAAAA	1	Pychron Script	1	Fusions CO2	4	4	0	4	0	30	30	187			0	0.0074414
	07	4	4.39896	0.0013487	-0.0194	0.3982	378.293	100.133	72.5506	0.191549								61750-07	CM-SS4B	37	2013-07-12	14.3667	3456484000		Sanidine	33	Iain Mason	Cuba Mesa	129.138.12.160	7.875	Ar40 bk val,er = @ 7/17/13 2:26 PM @ argonlab; Parabolic @ 7/17/13 2:26 PM @ argonlab; Ar39 bk val,er = @ 7/17/13 2:26 PM @ argonlab; Average background @ 7/17/13 2:26 PM @ argonlab; Ar38 bk val,er = @ 7/17/13 2:26 PM @ argonlab; Average background @ 7/17/13 2:26 PM @ argonlab; Ar37 bk val,er = @ 7/17/13 2:26 PM @ argonlab; Average background @ 7/17/13 2:26 PM @ argonlab; Ar36 bk val,er = @ 7/17/…	80-100 Mesh #, Curtail	APPLLPAAAAAA	1	Pychron Script	1	Fusions CO2	4	4	0	4	0	30	30	127			0	-0.0347861
	15	4	4.48762	0.0008619	0.029	0.426581	591.953	99.8066	73.7497	0.183291								61750-15	CM-SS4B	37	2013-07-12	17.8	3456496000		Sanidine	33	Iain Mason	Cuba Mesa	129.138.12.160	7.875	Ar40 bk val,er = @ 7/17/13 2:26 PM @ argonlab; Parabolic @ 7/17/13 2:26 PM @ argonlab; Ar39 bk val,er = @ 7/17/13 2:26 PM @ argonlab; Average background @ 7/17/13 2:26 PM @ argonlab; Ar38 bk val,er = @ 7/17/13 2:26 PM @ argonlab; Average background @ 7/17/13 2:26 PM @ argonlab; Ar37 bk val,er = @ 7/17/13 2:26 PM @ argonlab; Average background @ 7/17/13 2:26 PM @ argonlab; Ar36 bk val,er = @ 7/17/…	80-100 Mesh #, Curtail	APPLLPAAAAAA	1	Pychron Script	1	Fusions CO2	4	4	0	4	0	30	30	135			0	-0.0037921
	42	4	4.48246	0.004198	0.00892108	0.714813	121.535	99.9471	73.7682	0.108752								61750-42	CM-SS4B	37	2013-07-13	1.61667	3456524000		Sanidine	33	Iain Mason	Cuba Mesa	129.138.12.160	7.875	Ar40 bk val,er = @ 7/17/13 2:26 PM @ argonlab; Parabolic @ 7/17/13 2:26 PM @ argonlab; Ar39 bk val,er = @ 7/17/13 2:26 PM @ argonlab; Average background @ 7/17/13 2:26 PM @ argonlab; Ar38 bk val,er = @ 7/17/13 2:26 PM @ argonlab; Average background @ 7/17/13 2:26 PM @ argonlab; Ar37 bk val,er = @ 7/17/13 2:26 PM @ argonlab; Average background @ 7/17/13 2:26 PM @ argonlab; Ar36 bk val,er = @ 7/17/…	80-100 Mesh #, Curtail	APPLLPAAAAAA	1	Pychron Script	1	Fusions CO2	4	4	0	4	0	30	30	163			0	0.0151201
	36	4	4.50867	0.0033703	0.0116	0.720206	151.382	99.928	74.1777	0.107208								61750-36	CM-SS4B	37	2013-07-12	23.7167	3456517000		Sanidine	33	Iain Mason	Cuba Mesa	129.138.12.160	7.875	Ar40 bk val,er = @ 7/17/13 2:26 PM @ argonlab; Parabolic @ 7/17/13 2:26 PM @ argonlab; Ar39 bk val,er = @ 7/17/13 2:26 PM @ argonlab; Average background @ 7/17/13 2:26 PM @ argonlab; Ar38 bk val,er = @ 7/17/13 2:26 PM @ argonlab; Average background @ 7/17/13 2:26 PM @ argonlab; Ar37 bk val,er = @ 7/17/13 2:26 PM @ argonlab; Average background @ 7/17/13 2:26 PM @ argonlab; Ar36 bk val,er = @ 7/17/…	80-100 Mesh #, Curtail	APPLLPAAAAAA	1	Pychron Script	1	Fusions CO2	4	4	0	4	0	30	30	157			0	-0.0050458
	55	4	4.51325	0.0067631	0.000396663	0.779276	75.4394	100.009	74.3108	0.102686								61750-55	CM-SS4B	37	2013-07-13	5.53333	3456538000		Sanidine	33	Iain Mason	Cuba Mesa	129.138.12.160	7.875	Ar40 bk val,er = @ 7/17/13 2:26 PM @ argonlab; Parabolic @ 7/17/13 2:26 PM @ argonlab; Ar39 bk val,er = @ 7/17/13 2:26 PM @ argonlab; Average background @ 7/17/13 2:26 PM @ argonlab; Ar38 bk val,er = @ 7/17/13 2:26 PM @ argonlab; Average background @ 7/17/13 2:26 PM @ argonlab; Ar37 bk val,er = @ 7/17/13 2:26 PM @ argonlab; Average background @ 7/17/13 2:26 PM @ argonlab; Ar36 bk val,er = @ 7/17/…	80-100 Mesh #, Curtail	APPLLPAAAAAA	1	Pychron Script	1	Fusions CO2	4	4	0	4	0	30	30	176			0	-0.0357472
	16	4	4.5193	0.0044966	0.0139	1.69623	113.464	99.9175	74.3418	0.0482845								61750-16	CM-SS4B	37	2013-07-12	18.3333	3456498000		Sanidine	33	Iain Mason	Cuba Mesa	129.138.12.160	7.875	Ar40 bk val,er = @ 7/17/13 2:26 PM @ argonlab; Parabolic @ 7/17/13 2:26 PM @ argonlab; Ar39 bk val,er = @ 7/17/13 2:26 PM @ argonlab; Average background @ 7/17/13 2:26 PM @ argonlab; Ar38 bk val,er = @ 7/17/13 2:26 PM @ argonlab; Average background @ 7/17/13 2:26 PM @ argonlab; Ar37 bk val,er = @ 7/17/13 2:26 PM @ argonlab; Average background @ 7/17/13 2:26 PM @ argonlab; Ar36 bk val,er = @ 7/17/…	80-100 Mesh #, Curtail	APPLLPAAAAAA	1	Pychron Script	1	Fusions CO2	4	4	0	4	0	30	30	136			0	-0.0014721
	51	4	4.52829	0.0042959	0.0116	1.21067	118.765	99.9305	74.4965	0.0669252								61750-51	CM-SS4B	37	2013-07-13	4.16667	3456533000		Sanidine	33	Iain Mason	Cuba Mesa	129.138.12.160	7.875	Ar40 bk val,er = @ 7/17/13 2:26 PM @ argonlab; Parabolic @ 7/17/13 2:26 PM @ argonlab; Ar39 bk val,er = @ 7/17/13 2:26 PM @ argonlab; Average background @ 7/17/13 2:26 PM @ argonlab; Ar38 bk val,er = @ 7/17/13 2:26 PM @ argonlab; Average background @ 7/17/13 2:26 PM @ argonlab; Ar37 bk val,er = @ 7/17/13 2:26 PM @ argonlab; Average background @ 7/17/13 2:26 PM @ argonlab; Ar36 bk val,er = @ 7/17/…	80-100 Mesh #, Curtail	APPLLPAAAAAA	1	Pychron Script	1	Fusions CO2	4	4	0	4	0	30	30	172			0	-0.0220572
	37	4	4.55545	0.0033313	0.0117	1.37837	153.155	99.9297	74.9344	0.0595236								61750-37	CM-SS4B	37	2013-07-13	0.05	3456519000		Sanidine	33	Iain Mason	Cuba Mesa	129.138.12.160	7.875	Ar40 bk val,er = @ 7/17/13 2:26 PM @ argonlab; Parabolic @ 7/17/13 2:26 PM @ argonlab; Ar39 bk val,er = @ 7/17/13 2:26 PM @ argonlab; Average background @ 7/17/13 2:26 PM @ argonlab; Ar38 bk val,er = @ 7/17/13 2:26 PM @ argonlab; Average background @ 7/17/13 2:26 PM @ argonlab; Ar37 bk val,er = @ 7/17/13 2:26 PM @ argonlab; Average background @ 7/17/13 2:26 PM @ argonlab; Ar36 bk val,er = @ 7/17/…	80-100 Mesh #, Curtail	APPLLPAAAAAA	1	Pychron Script	1	Fusions CO2	4	4	0	4	0	30	30	158			0	-0.0059758
	60	4	4.56002	0.0042681	0.0108	1.29697	119.539	99.9372	75.0136	0.0625908								61750-60	CM-SS4B	37	2013-07-13	6.93333	3456543000		Sanidine	33	Iain Mason	Cuba Mesa	129.138.12.160	7.875	Ar40 bk val,er = @ 7/17/13 2:26 PM @ argonlab; Parabolic @ 7/17/13 2:26 PM @ argonlab; Ar39 bk val,er = @ 7/17/13 2:26 PM @ argonlab; Average background @ 7/17/13 2:26 PM @ argonlab; Ar38 bk val,er = @ 7/17/13 2:26 PM @ argonlab; Average background @ 7/17/13 2:26 PM @ argonlab; Ar37 bk val,er = @ 7/17/13 2:26 PM @ argonlab; Average background @ 7/17/13 2:26 PM @ argonlab; Ar36 bk val,er = @ 7/17/…	80-100 Mesh #, Curtail	APPLLPAAAAAA	1	Pychron Script	1	Fusions CO2	4	4	0	4	0	30	30	181			0	-0.0130948
	45	4	4.56736	0.0035609	0.0126	0.693682	143.28	99.9237	75.1222	0.112852								61750-45	CM-SS4B	37	2013-07-13	2.43333	3456527000		Sanidine	33	Iain Mason	Cuba Mesa	129.138.12.160	7.875	Ar40 bk val,er = @ 7/17/13 2:26 PM @ argonlab; Parabolic @ 7/17/13 2:26 PM @ argonlab; Ar39 bk val,er = @ 7/17/13 2:26 PM @ argonlab; Average background @ 7/17/13 2:26 PM @ argonlab; Ar38 bk val,er = @ 7/17/13 2:26 PM @ argonlab; Average background @ 7/17/13 2:26 PM @ argonlab; Ar37 bk val,er = @ 7/17/13 2:26 PM @ argonlab; Average background @ 7/17/13 2:26 PM @ argonlab; Ar36 bk val,er = @ 7/17/…	80-100 Mesh #, Curtail	APPLLPAAAAAA	1	Pychron Script	1	Fusions CO2	4	4	0	4	0	30	30	166			0	-0.0099399
	10	4	4.59263	0.0118894	0.0868	0.598798	42.9125	99.4543	75.1829	0.299911								61750-10	CM-SS4B	37	2013-07-12	16.45	3456491000		Sanidine	33	Iain Mason	Cuba Mesa	129.138.12.160	7.875	Ar40 bk val,er = @ 7/17/13 2:26 PM @ argonlab; Parabolic @ 7/17/13 2:26 PM @ argonlab; Ar39 bk val,er = @ 7/17/13 2:26 PM @ argonlab; Average background @ 7/17/13 2:26 PM @ argonlab; Ar38 bk val,er = @ 7/17/13 2:26 PM @ argonlab; Average background @ 7/17/13 2:26 PM @ argonlab; Ar37 bk val,er = @ 7/17/13 2:26 PM @ argonlab; Average background @ 7/17/13 2:26 PM @ argonlab; Ar36 bk val,er = @ 7/17/…	80-100 Mesh #, Curtail	APPLLPAAAAAA	1	Pychron Script	1	Fusions CO2	4	4	0	4	0	30	30	130			0	-0.0182
	64	4	4.57739	0.004537	0.029	1.04369	112.454	99.8204	75.2078	0.0771296								61750-64	CM-SS4B	37	2013-07-13	8.16667	3456548000		Sanidine	33	Iain Mason	Cuba Mesa	129.138.12.160	7.875	Ar40 bk val,er = @ 7/17/13 2:26 PM @ argonlab; Parabolic @ 7/17/13 2:26 PM @ argonlab; Ar39 bk val,er = @ 7/17/13 2:26 PM @ argonlab; Average background @ 7/17/13 2:26 PM @ argonlab; Ar38 bk val,er = @ 7/17/13 2:26 PM @ argonlab; Average background @ 7/17/13 2:26 PM @ argonlab; Ar37 bk val,er = @ 7/17/13 2:26 PM @ argonlab; Average background @ 7/17/13 2:26 PM @ argonlab; Ar36 bk val,er = @ 7/17/…	80-100 Mesh #, Curtail	APPLLPAAAAAA	1	Pychron Script	1	Fusions CO2	4	4	0	4	0	30	30	185			0	0.0040214
	57	4	4.60989	0.0121508	0.0605	0.884758	41.9893	99.6307	75.5913	0.208984								61750-57	CM-SS4B	37	2013-07-13	6.06667	3456540000		Sanidine	33	Iain Mason	Cuba Mesa	129.138.12.160	7.875	Ar40 bk val,er = @ 7/17/13 2:26 PM @ argonlab; Parabolic @ 7/17/13 2:26 PM @ argonlab; Ar39 bk val,er = @ 7/17/13 2:26 PM @ argonlab; Average background @ 7/17/13 2:26 PM @ argonlab; Ar38 bk val,er = @ 7/17/13 2:26 PM @ argonlab; Average background @ 7/17/13 2:26 PM @ argonlab; Ar37 bk val,er = @ 7/17/13 2:26 PM @ argonlab; Average background @ 7/17/13 2:26 PM @ argonlab; Ar36 bk val,er = @ 7/17/…	80-100 Mesh #, Curtail	APPLLPAAAAAA	1	Pychron Script	1	Fusions CO2	4	4	0	4	0	30	30	178			0	0.0001652
	52	4	4.63091	0.010774	0.0233	0.480081	47.3551	99.87	76.1079	0.29493								61750-52	CM-SS4B	37	2013-07-13	4.33333	3456534000		Sanidine	33	Iain Mason	Cuba Mesa	129.138.12.160	7.875	Ar40 bk val,er = @ 7/17/13 2:26 PM @ argonlab; Parabolic @ 7/17/13 2:26 PM @ argonlab; Ar39 bk val,er = @ 7/17/13 2:26 PM @ argonlab; Average background @ 7/17/13 2:26 PM @ argonlab; Ar38 bk val,er = @ 7/17/13 2:26 PM @ argonlab; Average background @ 7/17/13 2:26 PM @ argonlab; Ar37 bk val,er = @ 7/17/13 2:26 PM @ argonlab; Average background @ 7/17/13 2:26 PM @ argonlab; Ar36 bk val,er = @ 7/17/…	80-100 Mesh #, Curtail	APPLLPAAAAAA	1	Pychron Script	1	Fusions CO2	4	4	0	4	0	30	30	173			0	-0.0291272
	48	4	4.71514	0.0110957	0.0455	0.707325	45.9821	99.7293	77.3587	0.271209								61750-48	CM-SS4B	37	2013-07-13	3.1	3456530000		Sanidine	33	Iain Mason	Cuba Mesa	129.138.12.160	7.875	Ar40 bk val,er = @ 7/17/13 2:26 PM @ argonlab; Parabolic @ 7/17/13 2:26 PM @ argonlab; Ar39 bk val,er = @ 7/17/13 2:26 PM @ argonlab; Average background @ 7/17/13 2:26 PM @ argonlab; Ar38 bk val,er = @ 7/17/13 2:26 PM @ argonlab; Average background @ 7/17/13 2:26 PM @ argonlab; Ar37 bk val,er = @ 7/17/13 2:26 PM @ argonlab; Average background @ 7/17/13 2:26 PM @ argonlab; Ar36 bk val,er = @ 7/17/…	80-100 Mesh #, Curtail	APPLLPAAAAAA	1	Pychron Script	1	Fusions CO2	4	4	0	4	0	30	30	169			0	0.0259901
	54	4	4.77496	0.0040464	0.0206	0.981204	126.088	99.8759	78.4334	0.191609								61750-54	CM-SS4B	37	2013-07-13	4.8	3456536000		Sanidine	33	Iain Mason	Cuba Mesa	129.138.12.160	7.875	Ar40 bk val,er = @ 7/17/13 2:26 PM @ argonlab; Parabolic @ 7/17/13 2:26 PM @ argonlab; Ar39 bk val,er = @ 7/17/13 2:26 PM @ argonlab; Average background @ 7/17/13 2:26 PM @ argonlab; Ar38 bk val,er = @ 7/17/13 2:26 PM @ argonlab; Average background @ 7/17/13 2:26 PM @ argonlab; Ar37 bk val,er = @ 7/17/13 2:26 PM @ argonlab; Average background @ 7/17/13 2:26 PM @ argonlab; Ar36 bk val,er = @ 7/17/…	80-100 Mesh #, Curtail	APPLLPAAAAAA	1	Pychron Script	1	Fusions CO2	4	4	0	4	0	30	30	175			0	-0.0296272
	30	4	4.79052	0.0110394	0.0335	1.57413	46.2166	99.811	78.6342	0.139861								61750-30	CM-SS4B	37	2013-07-12	21.9333	3456511000		Sanidine	33	Iain Mason	Cuba Mesa	129.138.12.160	7.875	Ar40 bk val,er = @ 7/17/13 2:26 PM @ argonlab; Parabolic @ 7/17/13 2:26 PM @ argonlab; Ar39 bk val,er = @ 7/17/13 2:26 PM @ argonlab; Average background @ 7/17/13 2:26 PM @ argonlab; Ar38 bk val,er = @ 7/17/13 2:26 PM @ argonlab; Average background @ 7/17/13 2:26 PM @ argonlab; Ar37 bk val,er = @ 7/17/13 2:26 PM @ argonlab; Average background @ 7/17/13 2:26 PM @ argonlab; Ar36 bk val,er = @ 7/17/…	80-100 Mesh #, Curtail	APPLLPAAAAAA	1	Pychron Script	1	Fusions CO2	4	4	0	4	0	30	30	151			0	0.0193047
	27	4	4.85333	0.0097656	-0.0196	0.81788	52.245	100.137	79.8991	0.251077								61750-27	CM-SS4B	37	2013-07-12	21.05	3456508000		Sanidine	33	Iain Mason	Cuba Mesa	129.138.12.160	7.875	Ar40 bk val,er = @ 7/17/13 2:26 PM @ argonlab; Parabolic @ 7/17/13 2:26 PM @ argonlab; Ar39 bk val,er = @ 7/17/13 2:26 PM @ argonlab; Average background @ 7/17/13 2:26 PM @ argonlab; Ar38 bk val,er = @ 7/17/13 2:26 PM @ argonlab; Average background @ 7/17/13 2:26 PM @ argonlab; Ar37 bk val,er = @ 7/17/13 2:26 PM @ argonlab; Average background @ 7/17/13 2:26 PM @ argonlab; Ar36 bk val,er = @ 7/17/…	80-100 Mesh #, Curtail	APPLLPAAAAAA	1	Pychron Script	1	Fusions CO2	4	4	0	4	0	30	30	148			0	-0.0032619
	58	4	4.88656	0.0121083	0.0655	0.628317	42.1367	99.6192	80.0283	0.301811								61750-58	CM-SS4B	37	2013-07-13	6.23333	3456541000		Sanidine	33	Iain Mason	Cuba Mesa	129.138.12.160	7.875	Ar40 bk val,er = @ 7/17/13 2:26 PM @ argonlab; Parabolic @ 7/17/13 2:26 PM @ argonlab; Ar39 bk val,er = @ 7/17/13 2:26 PM @ argonlab; Average background @ 7/17/13 2:26 PM @ argonlab; Ar38 bk val,er = @ 7/17/13 2:26 PM @ argonlab; Average background @ 7/17/13 2:26 PM @ argonlab; Ar37 bk val,er = @ 7/17/13 2:26 PM @ argonlab; Average background @ 7/17/13 2:26 PM @ argonlab; Ar36 bk val,er = @ 7/17/…	80-100 Mesh #, Curtail	APPLLPAAAAAA	1	Pychron Script	1	Fusions CO2	4	4	0	4	0	30	30	179			0	-0.193835
	08	4	4.93648	0.0038087	-0.0171	0.832108	133.958	100.109	81.2172	0.261862								61750-08	CM-SS4B	37	2013-07-12	14.9667	3456486000		Sanidine	33	Iain Mason	Cuba Mesa	129.138.12.160	7.875	Ar40 bk val,er = @ 7/17/13 2:26 PM @ argonlab; Parabolic @ 7/17/13 2:26 PM @ argonlab; Ar39 bk val,er = @ 7/17/13 2:26 PM @ argonlab; Average background @ 7/17/13 2:26 PM @ argonlab; Ar38 bk val,er = @ 7/17/13 2:26 PM @ argonlab; Average background @ 7/17/13 2:26 PM @ argonlab; Ar37 bk val,er = @ 7/17/13 2:26 PM @ argonlab; Average background @ 7/17/13 2:26 PM @ argonlab; Ar36 bk val,er = @ 7/17/…	80-100 Mesh #, Curtail	APPLLPAAAAAA	1	Pychron Script	1	Fusions CO2	4	4	0	4	0	30	30	128			0	-0.0047
	13	4	4.96987	0.0047609	0.0412	0.419676	107.165	99.7587	81.4761	0.423137								61750-13	CM-SS4B	37	2013-07-12	16.9	3456493000		Sanidine	33	Iain Mason	Cuba Mesa	129.138.12.160	7.875	Ar40 bk val,er = @ 7/17/13 2:26 PM @ argonlab; Parabolic @ 7/17/13 2:26 PM @ argonlab; Ar39 bk val,er = @ 7/17/13 2:26 PM @ argonlab; Average background @ 7/17/13 2:26 PM @ argonlab; Ar38 bk val,er = @ 7/17/13 2:26 PM @ argonlab; Average background @ 7/17/13 2:26 PM @ argonlab; Ar37 bk val,er = @ 7/17/13 2:26 PM @ argonlab; Average background @ 7/17/13 2:26 PM @ argonlab; Ar36 bk val,er = @ 7/17/…	80-100 Mesh #, Curtail	APPLLPAAAAAA	1	Pychron Script	1	Fusions CO2	4	4	0	4	0	30	30	133			0	0.0019
	18	4	5.94538	-0.005194	-0.0335	0.674157	-	100.162	97.4568	0.3056								61750-18	CM-SS4B	37	2013-07-12	18.6333	3456499000		Sanidine	33	Iain Mason	Cuba Mesa	129.138.12.160	7.875	Ar40 bk val,er = @ 7/17/13 2:26 PM @ argonlab; Parabolic @ 7/17/13 2:26 PM @ argonlab; Ar39 bk val,er = @ 7/17/13 2:26 PM @ argonlab; Average background @ 7/17/13 2:26 PM @ argonlab; Ar38 bk val,er = @ 7/17/13 2:26 PM @ argonlab; Average background @ 7/17/13 2:26 PM @ argonlab; Ar37 bk val,er = @ 7/17/13 2:26 PM @ argonlab; Average background @ 7/17/13 2:26 PM @ argonlab; Ar36 bk val,er = @ 7/17/…	80-100 Mesh #, Curtail	APPLLPAAAAAA	1	Pychron Script	1	Fusions CO2	4	4	0	4	0	30	30	138			0	0.0160079
	43	4	6.11415	-0.002267	0.0469	0.143197	-	99.7628	99.7638	1.28824								61750-43	CM-SS4B	37	2013-07-13	1.76667	3456525000		Sanidine	33	Iain Mason	Cuba Mesa	129.138.12.160	7.875	Ar40 bk val,er = @ 7/17/13 2:26 PM @ argonlab; Parabolic @ 7/17/13 2:26 PM @ argonlab; Ar39 bk val,er = @ 7/17/13 2:26 PM @ argonlab; Average background @ 7/17/13 2:26 PM @ argonlab; Ar38 bk val,er = @ 7/17/13 2:26 PM @ argonlab; Average background @ 7/17/13 2:26 PM @ argonlab; Ar37 bk val,er = @ 7/17/13 2:26 PM @ argonlab; Average background @ 7/17/13 2:26 PM @ argonlab; Ar36 bk val,er = @ 7/17/…	80-100 Mesh #, Curtail	APPLLPAAAAAA	1	Pychron Script	1	Fusions CO2	4	4	0	4	0	30	30	164			0	-0.0054699
	62	4	6.93095	-0.0037408	0.112	0.880426	-	99.5138	112.432	0.270925								61750-62	CM-SS4B	37	2013-07-13	7.23333	3456544000		Sanidine	33	Iain Mason	Cuba Mesa	129.138.12.160	7.875	Ar40 bk val,er = @ 7/17/13 2:26 PM @ argonlab; Parabolic @ 7/17/13 2:26 PM @ argonlab; Ar39 bk val,er = @ 7/17/13 2:26 PM @ argonlab; Average background @ 7/17/13 2:26 PM @ argonlab; Ar38 bk val,er = @ 7/17/13 2:26 PM @ argonlab; Average background @ 7/17/13 2:26 PM @ argonlab; Ar37 bk val,er = @ 7/17/13 2:26 PM @ argonlab; Average background @ 7/17/13 2:26 PM @ argonlab; Ar36 bk val,er = @ 7/17/…	80-100 Mesh #, Curtail	APPLLPAAAAAA	1	Pychron Script	1	Fusions CO2	4	4	0	4	0	30	30	183			0	0.0091652
	17	4	7.9299	-0.0139614	0.2063	0.412563	-	99.2097	127.72	0.524338								61750-17	CM-SS4B	37	2013-07-12	18.4833	3456499000		Sanidine	33	Iain Mason	Cuba Mesa	129.138.12.160	7.875	Ar40 bk val,er = @ 7/17/13 2:26 PM @ argonlab; Parabolic @ 7/17/13 2:26 PM @ argonlab; Ar39 bk val,er = @ 7/17/13 2:26 PM @ argonlab; Average background @ 7/17/13 2:26 PM @ argonlab; Ar38 bk val,er = @ 7/17/13 2:26 PM @ argonlab; Average background @ 7/17/13 2:26 PM @ argonlab; Ar37 bk val,er = @ 7/17/13 2:26 PM @ argonlab; Average background @ 7/17/13 2:26 PM @ argonlab; Ar36 bk val,er = @ 7/17/…	80-100 Mesh #, Curtail	APPLLPAAAAAA	1	Pychron Script	1	Fusions CO2	4	4	0	4	0	30	30	137			0	0.0048679
	03	4	8.16073	-0.0018943	0.2821	0.97512	-	98.9714	131.007	0.293856								61750-03	CM-SS4B	37	2013-07-12	13.0833	3456479000		Sanidine	33	Iain Mason	Cuba Mesa	129.138.12.160	7.875	Ar40 bk val,er = @ 7/17/13 2:26 PM @ argonlab; Parabolic @ 7/17/13 2:26 PM @ argonlab; Ar39 bk val,er = @ 7/17/13 2:26 PM @ argonlab; Average background @ 7/17/13 2:26 PM @ argonlab; Ar38 bk val,er = @ 7/17/13 2:26 PM @ argonlab; Average background @ 7/17/13 2:26 PM @ argonlab; Ar37 bk val,er = @ 7/17/13 2:26 PM @ argonlab; Average background @ 7/17/13 2:26 PM @ argonlab; Ar36 bk val,er = @ 7/17/…	80-100 Mesh #, Curtail	APPLLPAAAAAA	1	Pychron Script	1	Fusions CO2	4	4	0	4	0	30	30	122			0	-0.0092035
	09	4	8.96198	0.0240034	0.0384	0.325763	21.2555	99.8956	144.68	0.896648								61750-09	CM-SS4B	37	2013-07-12	15.1167	3456486000		Sanidine	33	Iain Mason	Cuba Mesa	129.138.12.160	7.875	Ar40 bk val,er = @ 7/17/13 2:26 PM @ argonlab; Parabolic @ 7/17/13 2:26 PM @ argonlab; Ar39 bk val,er = @ 7/17/13 2:26 PM @ argonlab; Average background @ 7/17/13 2:26 PM @ argonlab; Ar38 bk val,er = @ 7/17/13 2:26 PM @ argonlab; Average background @ 7/17/13 2:26 PM @ argonlab; Ar37 bk val,er = @ 7/17/13 2:26 PM @ argonlab; Average background @ 7/17/13 2:26 PM @ argonlab; Ar36 bk val,er = @ 7/17/…	80-100 Mesh #, Curtail	APPLLPAAAAAA	1	Pychron Script	1	Fusions CO2	4	4	0	4	0	30	30	129			0	0.0089
	44	4	9.335	-0.0021002	0.0304	0.850237	-	99.9013	150.472	0.358591								61750-44	CM-SS4B	37	2013-07-13	1.91667	3456525000		Sanidine	33	Iain Mason	Cuba Mesa	129.138.12.160	7.875	Ar40 bk val,er = @ 7/17/13 2:26 PM @ argonlab; Parabolic @ 7/17/13 2:26 PM @ argonlab; Ar39 bk val,er = @ 7/17/13 2:26 PM @ argonlab; Average background @ 7/17/13 2:26 PM @ argonlab; Ar38 bk val,er = @ 7/17/13 2:26 PM @ argonlab; Average background @ 7/17/13 2:26 PM @ argonlab; Ar37 bk val,er = @ 7/17/13 2:26 PM @ argonlab; Average background @ 7/17/13 2:26 PM @ argonlab; Ar36 bk val,er = @ 7/17/…	80-100 Mesh #, Curtail	APPLLPAAAAAA	1	Pychron Script	1	Fusions CO2	4	4	0	4	0	30	30	165			0	0.0254801
	33	4	9.99609	0.0102102	0.0371	0.954512	49.97	99.8975	160.677	0.359223								61750-33	CM-SS4B	37	2013-07-12	22.6	3456513000		Sanidine	33	Iain Mason	Cuba Mesa	129.138.12.160	7.875	Ar40 bk val,er = @ 7/17/13 2:26 PM @ argonlab; Parabolic @ 7/17/13 2:26 PM @ argonlab; Ar39 bk val,er = @ 7/17/13 2:26 PM @ argonlab; Average background @ 7/17/13 2:26 PM @ argonlab; Ar38 bk val,er = @ 7/17/13 2:26 PM @ argonlab; Average background @ 7/17/13 2:26 PM @ argonlab; Ar37 bk val,er = @ 7/17/13 2:26 PM @ argonlab; Average background @ 7/17/13 2:26 PM @ argonlab; Ar36 bk val,er = @ 7/17/…	80-100 Mesh #, Curtail	APPLLPAAAAAA	1	Pychron Script	1	Fusions CO2	4	4	0	4	0	30	30	154			0	-0.0022953
	41	4	11.3596	2.58e-05	0.094	0.629162	19775.3	99.7528	181.303	0.460732								61750-41	CM-SS4B	37	2013-07-13	1.06667	3456522000		Sanidine	33	Iain Mason	Cuba Mesa	129.138.12.160	7.875	Ar40 bk val,er = @ 7/17/13 2:26 PM @ argonlab; Parabolic @ 7/17/13 2:26 PM @ argonlab; Ar39 bk val,er = @ 7/17/13 2:26 PM @ argonlab; Average background @ 7/17/13 2:26 PM @ argonlab; Ar38 bk val,er = @ 7/17/13 2:26 PM @ argonlab; Average background @ 7/17/13 2:26 PM @ argonlab; Ar37 bk val,er = @ 7/17/13 2:26 PM @ argonlab; Average background @ 7/17/13 2:26 PM @ argonlab; Ar36 bk val,er = @ 7/17/…	80-100 Mesh #, Curtail	APPLLPAAAAAA	1	Pychron Script	1	Fusions CO2	4	4	0	4	0	30	30	162			0	-0.0105558
	61	4	11.6978	-0.0074265	0.2999	0.230495	-	99.2349	185.518	1.30868								61750-61	CM-SS4B	37	2013-07-13	7.08333	3456544000		Sanidine	33	Iain Mason	Cuba Mesa	129.138.12.160	7.875	Ar40 bk val,er = @ 7/17/13 2:26 PM @ argonlab; Parabolic @ 7/17/13 2:26 PM @ argonlab; Ar39 bk val,er = @ 7/17/13 2:26 PM @ argonlab; Average background @ 7/17/13 2:26 PM @ argonlab; Ar38 bk val,er = @ 7/17/13 2:26 PM @ argonlab; Average background @ 7/17/13 2:26 PM @ argonlab; Ar37 bk val,er = @ 7/17/13 2:26 PM @ argonlab; Average background @ 7/17/13 2:26 PM @ argonlab; Ar36 bk val,er = @ 7/17/…	80-100 Mesh #, Curtail	APPLLPAAAAAA	1	Pychron Script	1	Fusions CO2	4	4	0	4	0	30	30	182			0	-0.0074648
	23	4	12.0147	0.0086513	0.0434	1.39699	58.9743	99.898	191.503	0.308822								61750-23	CM-SS4B	37	2013-07-12	20.2333	3456505000		Sanidine	33	Iain Mason	Cuba Mesa	129.138.12.160	7.875	Ar40 bk val,er = @ 7/17/13 2:26 PM @ argonlab; Parabolic @ 7/17/13 2:26 PM @ argonlab; Ar39 bk val,er = @ 7/17/13 2:26 PM @ argonlab; Average background @ 7/17/13 2:26 PM @ argonlab; Ar38 bk val,er = @ 7/17/13 2:26 PM @ argonlab; Average background @ 7/17/13 2:26 PM @ argonlab; Ar37 bk val,er = @ 7/17/13 2:26 PM @ argonlab; Average background @ 7/17/13 2:26 PM @ argonlab; Ar36 bk val,er = @ 7/17/…	80-100 Mesh #, Curtail	APPLLPAAAAAA	1	Pychron Script	1	Fusions CO2	4	4	0	4	0	30	30	144			0	-0.0080619
	39	4	12.2697	-0.0039102	0.0718	0.841819	-	99.8234	195.221	0.444941								61750-39	CM-SS4B	37	2013-07-13	0.55	3456520000		Sanidine	33	Iain Mason	Cuba Mesa	129.138.12.160	7.875	Ar40 bk val,er = @ 7/17/13 2:26 PM @ argonlab; Parabolic @ 7/17/13 2:26 PM @ argonlab; Ar39 bk val,er = @ 7/17/13 2:26 PM @ argonlab; Average background @ 7/17/13 2:26 PM @ argonlab; Ar38 bk val,er = @ 7/17/13 2:26 PM @ argonlab; Average background @ 7/17/13 2:26 PM @ argonlab; Ar37 bk val,er = @ 7/17/13 2:26 PM @ argonlab; Average background @ 7/17/13 2:26 PM @ argonlab; Ar36 bk val,er = @ 7/17/…	80-100 Mesh #, Curtail	APPLLPAAAAAA	1	Pychron Script	1	Fusions CO2	4	4	0	4	0	30	30	160			0	-0.0387158
	11	4	12.296	0.0058416	0.0915	1.0948	87.3398	99.7821	195.543	0.361789								61750-11	CM-SS4B	37	2013-07-12	16.6	3456492000		Sanidine	33	Iain Mason	Cuba Mesa	129.138.12.160	7.875	Ar40 bk val,er = @ 7/17/13 2:26 PM @ argonlab; Parabolic @ 7/17/13 2:26 PM @ argonlab; Ar39 bk val,er = @ 7/17/13 2:26 PM @ argonlab; Average background @ 7/17/13 2:26 PM @ argonlab; Ar38 bk val,er = @ 7/17/13 2:26 PM @ argonlab; Average background @ 7/17/13 2:26 PM @ argonlab; Ar37 bk val,er = @ 7/17/13 2:26 PM @ argonlab; Average background @ 7/17/13 2:26 PM @ argonlab; Ar36 bk val,er = @ 7/17/…	80-100 Mesh #, Curtail	APPLLPAAAAAA	1	Pychron Script	1	Fusions CO2	4	4	0	4	0	30	30	131			0	0.0059
	25	4	12.8059	0.0074568	0.0912	0.288306	68.4213	99.7918	203.24	1.07674								61750-25	CM-SS4B	37	2013-07-12	20.75	3456507000		Sanidine	33	Iain Mason	Cuba Mesa	129.138.12.160	7.875	Ar40 bk val,er = @ 7/17/13 2:26 PM @ argonlab; Parabolic @ 7/17/13 2:26 PM @ argonlab; Ar39 bk val,er = @ 7/17/13 2:26 PM @ argonlab; Average background @ 7/17/13 2:26 PM @ argonlab; Ar38 bk val,er = @ 7/17/13 2:26 PM @ argonlab; Average background @ 7/17/13 2:26 PM @ argonlab; Ar37 bk val,er = @ 7/17/13 2:26 PM @ argonlab; Average background @ 7/17/13 2:26 PM @ argonlab; Ar36 bk val,er = @ 7/17/…	80-100 Mesh #, Curtail	APPLLPAAAAAA	1	Pychron Script	1	Fusions CO2	4	4	0	4	0	30	30	146			0	0.0158381
	20	4	13.1779	-0.0026131	0.1241	0.389271	-	99.7189	208.679	0.855361								61750-20	CM-SS4B	37	2013-07-12	19.35	3456502000		Sanidine	33	Iain Mason	Cuba Mesa	129.138.12.160	7.875	Ar40 bk val,er = @ 7/17/13 2:26 PM @ argonlab; Parabolic @ 7/17/13 2:26 PM @ argonlab; Ar39 bk val,er = @ 7/17/13 2:26 PM @ argonlab; Average background @ 7/17/13 2:26 PM @ argonlab; Ar38 bk val,er = @ 7/17/13 2:26 PM @ argonlab; Average background @ 7/17/13 2:26 PM @ argonlab; Ar37 bk val,er = @ 7/17/13 2:26 PM @ argonlab; Average background @ 7/17/13 2:26 PM @ argonlab; Ar36 bk val,er = @ 7/17/…	80-100 Mesh #, Curtail	APPLLPAAAAAA	1	Pychron Script	1	Fusions CO2	4	4	0	4	0	30	30	141			0	-0.0231921
	06	4	13.2805	0.0187815	0.0495	0.356826	27.1652	99.9002	210.577	1.12357								61750-06	CM-SS4B	37	2013-07-12	13.75	3456482000		Sanidine	33	Iain Mason	Cuba Mesa	129.138.12.160	7.875	Ar40 bk val,er = @ 7/17/13 2:26 PM @ argonlab; Parabolic @ 7/17/13 2:26 PM @ argonlab; Ar39 bk val,er = @ 7/17/13 2:26 PM @ argonlab; Average background @ 7/17/13 2:26 PM @ argonlab; Ar38 bk val,er = @ 7/17/13 2:26 PM @ argonlab; Average background @ 7/17/13 2:26 PM @ argonlab; Ar37 bk val,er = @ 7/17/13 2:26 PM @ argonlab; Average background @ 7/17/13 2:26 PM @ argonlab; Ar36 bk val,er = @ 7/17/…	80-100 Mesh #, Curtail	APPLLPAAAAAA	1	Pychron Script	1	Fusions CO2	4	4	0	4	0	30	30	125			0	-0.0030035
	12	4	13.6778	-0.0065673	0.2088	0.610865	-	99.5406	215.784	0.580473								61750-12	CM-SS4B	37	2013-07-12	16.75	3456492000		Sanidine	33	Iain Mason	Cuba Mesa	129.138.12.160	7.875	Ar40 bk val,er = @ 7/17/13 2:26 PM @ argonlab; Parabolic @ 7/17/13 2:26 PM @ argonlab; Ar39 bk val,er = @ 7/17/13 2:26 PM @ argonlab; Average background @ 7/17/13 2:26 PM @ argonlab; Ar38 bk val,er = @ 7/17/13 2:26 PM @ argonlab; Average background @ 7/17/13 2:26 PM @ argonlab; Ar37 bk val,er = @ 7/17/13 2:26 PM @ argonlab; Average background @ 7/17/13 2:26 PM @ argonlab; Ar36 bk val,er = @ 7/17/…	80-100 Mesh #, Curtail	APPLLPAAAAAA	1	Pychron Script	1	Fusions CO2	4	4	0	4	0	30	30	132			0	0.00529
	68	4	13.929	-0.0022099	0.0143	1.29351	-	99.9686	220.41	0.298916								61750-68	CM-SS4B	37	2013-07-13	9.48333	3456553000		Sanidine	33	Iain Mason	Cuba Mesa	129.138.12.160	7.875	Ar40 bk val,er = @ 7/17/13 2:26 PM @ argonlab; Parabolic @ 7/17/13 2:26 PM @ argonlab; Ar39 bk val,er = @ 7/17/13 2:26 PM @ argonlab; Average background @ 7/17/13 2:26 PM @ argonlab; Ar38 bk val,er = @ 7/17/13 2:26 PM @ argonlab; Average background @ 7/17/13 2:26 PM @ argonlab; Ar37 bk val,er = @ 7/17/13 2:26 PM @ argonlab; Average background @ 7/17/13 2:26 PM @ argonlab; Ar36 bk val,er = @ 7/17/…	80-100 Mesh #, Curtail	APPLLPAAAAAA	1	Pychron Script	1	Fusions CO2	4	4	0	4	0	30	30	189			0	0.0068214
	70	4	15.7603	-0.0016133	0.0592	1.1959	-	99.8874	247.336	0.393393								61750-70	CM-SS4B	37	2013-07-13	10.6167	3456557000		Sanidine	33	Iain Mason	Cuba Mesa	129.138.12.160	7.875	Ar40 bk val,er = @ 7/17/13 2:26 PM @ argonlab; Parabolic @ 7/17/13 2:26 PM @ argonlab; Ar39 bk val,er = @ 7/17/13 2:26 PM @ argonlab; Average background @ 7/17/13 2:26 PM @ argonlab; Ar38 bk val,er = @ 7/17/13 2:26 PM @ argonlab; Average background @ 7/17/13 2:26 PM @ argonlab; Ar37 bk val,er = @ 7/17/13 2:26 PM @ argonlab; Average background @ 7/17/13 2:26 PM @ argonlab; Ar36 bk val,er = @ 7/17/…	80-100 Mesh #, Curtail	APPLLPAAAAAA	1	Pychron Script	1	Fusions CO2	4	4	0	4	0	30	30	191			0	0.0358728
	01	4	19.5287	-0.0019539	0.0772	0.812972	-	99.8815	301.845	0.670851								61750-01	CM-SS4B	37	2013-07-12	11.7167	3456474000		Sanidine	33	Iain Mason	Cuba Mesa	129.138.12.160	7.875	Ar40 bk val,er = @ 7/17/13 2:26 PM @ argonlab; Parabolic @ 7/17/13 2:26 PM @ argonlab; Ar39 bk val,er = @ 7/17/13 2:26 PM @ argonlab; Average background @ 7/17/13 2:26 PM @ argonlab; Ar38 bk val,er = @ 7/17/13 2:26 PM @ argonlab; Average background @ 7/17/13 2:26 PM @ argonlab; Ar37 bk val,er = @ 7/17/13 2:26 PM @ argonlab; Average background @ 7/17/13 2:26 PM @ argonlab; Ar36 bk val,er = @ 7/17/…	80-100 Mesh #, Curtail	APPLLPAAAAAA	1	Pychron Script	1	Fusions CO2	4	4	0	4	0	30	30	120			0	0.0008
	26	4	31.2297	0.0019937	0.0103	1.13524	255.908	99.9904	461.919	0.60786								61750-26	CM-SS4B	37	2013-07-12	20.9	3456507000		Sanidine	33	Iain Mason	Cuba Mesa	129.138.12.160	7.875	Ar40 bk val,er = @ 7/17/13 2:26 PM @ argonlab; Parabolic @ 7/17/13 2:26 PM @ argonlab; Ar39 bk val,er = @ 7/17/13 2:26 PM @ argonlab; Average background @ 7/17/13 2:26 PM @ argonlab; Ar38 bk val,er = @ 7/17/13 2:26 PM @ argonlab; Average background @ 7/17/13 2:26 PM @ argonlab; Ar37 bk val,er = @ 7/17/13 2:26 PM @ argonlab; Average background @ 7/17/13 2:26 PM @ argonlab; Ar36 bk val,er = @ 7/17/…	80-100 Mesh #, Curtail	APPLLPAAAAAA	1	Pychron Script	1	Fusions CO2	4	4	0	4	0	30	30	147			0	0.0017381
	49	4	31.5588	-0.0070431	0.1176	0.574647	-	99.8871	465.79	1.09525								61750-49	CM-SS4B	37	2013-07-13	3.48333	3456531000		Sanidine	33	Iain Mason	Cuba Mesa	129.138.12.160	7.875	Ar40 bk val,er = @ 7/17/13 2:26 PM @ argonlab; Parabolic @ 7/17/13 2:26 PM @ argonlab; Ar39 bk val,er = @ 7/17/13 2:26 PM @ argonlab; Average background @ 7/17/13 2:26 PM @ argonlab; Ar38 bk val,er = @ 7/17/13 2:26 PM @ argonlab; Average background @ 7/17/13 2:26 PM @ argonlab; Ar37 bk val,er = @ 7/17/13 2:26 PM @ argonlab; Average background @ 7/17/13 2:26 PM @ argonlab; Ar36 bk val,er = @ 7/17/…	80-100 Mesh #, Curtail	APPLLPAAAAAA	1	Pychron Script	1	Fusions CO2	4	4	0	4	0	30	30	170			0	0.0046428
	22	4	34.3038	0.0031097	0.1047	0.768748	164.069	99.9098	501.326	1.0919								61750-22	CM-SS4B	37	2013-07-12	19.8833	3456504000		Sanidine	33	Iain Mason	Cuba Mesa	129.138.12.160	7.875	Ar40 bk val,er = @ 7/17/13 2:26 PM @ argonlab; Parabolic @ 7/17/13 2:26 PM @ argonlab; Ar39 bk val,er = @ 7/17/13 2:26 PM @ argonlab; Average background @ 7/17/13 2:26 PM @ argonlab; Ar38 bk val,er = @ 7/17/13 2:26 PM @ argonlab; Average background @ 7/17/13 2:26 PM @ argonlab; Ar37 bk val,er = @ 7/17/13 2:26 PM @ argonlab; Average background @ 7/17/13 2:26 PM @ argonlab; Ar36 bk val,er = @ 7/17/…	80-100 Mesh #, Curtail	APPLLPAAAAAA	1	Pychron Script	1	Fusions CO2	4	4	0	4	0	30	30	143			0	0.0183381
	46	4	35.1531	-0.0032139	0.2107	0.373975	-	99.8206	511.754	1.81985								61750-46	CM-SS4B	37	2013-07-13	2.6	3456528000		Sanidine	33	Iain Mason	Cuba Mesa	129.138.12.160	7.875	Ar40 bk val,er = @ 7/17/13 2:26 PM @ argonlab; Parabolic @ 7/17/13 2:26 PM @ argonlab; Ar39 bk val,er = @ 7/17/13 2:26 PM @ argonlab; Average background @ 7/17/13 2:26 PM @ argonlab; Ar38 bk val,er = @ 7/17/13 2:26 PM @ argonlab; Average background @ 7/17/13 2:26 PM @ argonlab; Ar37 bk val,er = @ 7/17/13 2:26 PM @ argonlab; Average background @ 7/17/13 2:26 PM @ argonlab; Ar36 bk val,er = @ 7/17/…	80-100 Mesh #, Curtail	APPLLPAAAAAA	1	Pychron Script	1	Fusions CO2	4	4	0	4	0	30	30	167			0	0.0316201
	29	4	42.9111	0.0042208	0.168	0.754967	120.879	99.8842	608.072	1.24018								61750-29	CM-SS4B	37	2013-07-12	21.5667	3456510000		Sanidine	33	Iain Mason	Cuba Mesa	129.138.12.160	7.875	Ar40 bk val,er = @ 7/17/13 2:26 PM @ argonlab; Parabolic @ 7/17/13 2:26 PM @ argonlab; Ar39 bk val,er = @ 7/17/13 2:26 PM @ argonlab; Average background @ 7/17/13 2:26 PM @ argonlab; Ar38 bk val,er = @ 7/17/13 2:26 PM @ argonlab; Average background @ 7/17/13 2:26 PM @ argonlab; Ar37 bk val,er = @ 7/17/13 2:26 PM @ argonlab; Average background @ 7/17/13 2:26 PM @ argonlab; Ar36 bk val,er = @ 7/17/…	80-100 Mesh #, Curtail	APPLLPAAAAAA	1	Pychron Script	1	Fusions CO2	4	4	0	4	0	30	30	150			0	0.0168347
	69	4	44.7525	0.0014103	0.0498	1.00798	361.77	99.9669	630.585	0.857618								61750-69	CM-SS4B	37	2013-07-13	9.85	3456554000		Sanidine	33	Iain Mason	Cuba Mesa	129.138.12.160	7.875	Ar40 bk val,er = @ 7/17/13 2:26 PM @ argonlab; Parabolic @ 7/17/13 2:26 PM @ argonlab; Ar39 bk val,er = @ 7/17/13 2:26 PM @ argonlab; Average background @ 7/17/13 2:26 PM @ argonlab; Ar38 bk val,er = @ 7/17/13 2:26 PM @ argonlab; Average background @ 7/17/13 2:26 PM @ argonlab; Ar37 bk val,er = @ 7/17/13 2:26 PM @ argonlab; Average background @ 7/17/13 2:26 PM @ argonlab; Ar36 bk val,er = @ 7/17/…	80-100 Mesh #, Curtail	APPLLPAAAAAA	1	Pychron Script	1	Fusions CO2	4	4	0	4	0	30	30	190			0	0.0105214
	04	4	47.5212	-0.008635	0.1403	0.25674	-	99.9106	662.981	3.17075								61750-04	CM-SS4B	37	2013-07-12	13.2333	3456480000		Sanidine	33	Iain Mason	Cuba Mesa	129.138.12.160	7.875	Ar40 bk val,er = @ 7/17/13 2:26 PM @ argonlab; Parabolic @ 7/17/13 2:26 PM @ argonlab; Ar39 bk val,er = @ 7/17/13 2:26 PM @ argonlab; Average background @ 7/17/13 2:26 PM @ argonlab; Ar38 bk val,er = @ 7/17/13 2:26 PM @ argonlab; Average background @ 7/17/13 2:26 PM @ argonlab; Ar37 bk val,er = @ 7/17/13 2:26 PM @ argonlab; Average background @ 7/17/13 2:26 PM @ argonlab; Ar36 bk val,er = @ 7/17/…	80-100 Mesh #, Curtail	APPLLPAAAAAA	1	Pychron Script	1	Fusions CO2	4	4	0	4	0	30	30	123			0	-0.0092035
	40	4	51.7646	0.0149543	0.0899	0.553159	34.1175	99.9503	712.235	1.76913								61750-40	CM-SS4B	37	2013-07-13	0.916667	3456522000		Sanidine	33	Iain Mason	Cuba Mesa	129.138.12.160	7.875	Ar40 bk val,er = @ 7/17/13 2:26 PM @ argonlab; Parabolic @ 7/17/13 2:26 PM @ argonlab; Ar39 bk val,er = @ 7/17/13 2:26 PM @ argonlab; Average background @ 7/17/13 2:26 PM @ argonlab; Ar38 bk val,er = @ 7/17/13 2:26 PM @ argonlab; Average background @ 7/17/13 2:26 PM @ argonlab; Ar37 bk val,er = @ 7/17/13 2:26 PM @ argonlab; Average background @ 7/17/13 2:26 PM @ argonlab; Ar36 bk val,er = @ 7/17/…	80-100 Mesh #, Curtail	APPLLPAAAAAA	1	Pychron Script	1	Fusions CO2	4	4	0	4	0	30	30	161			0	0.0025642
	31	4	58.5638	0.0128839	0.0363	0.393194	39.6001	99.9833	788.359	2.53663								61750-31	CM-SS4B	37	2013-07-12	22.3	3456512000		Sanidine	33	Iain Mason	Cuba Mesa	129.138.12.160	7.875	Ar40 bk val,er = @ 7/17/13 2:26 PM @ argonlab; Parabolic @ 7/17/13 2:26 PM @ argonlab; Ar39 bk val,er = @ 7/17/13 2:26 PM @ argonlab; Average background @ 7/17/13 2:26 PM @ argonlab; Ar38 bk val,er = @ 7/17/13 2:26 PM @ argonlab; Average background @ 7/17/13 2:26 PM @ argonlab; Ar37 bk val,er = @ 7/17/13 2:26 PM @ argonlab; Average background @ 7/17/13 2:26 PM @ argonlab; Ar36 bk val,er = @ 7/17/…	80-100 Mesh #, Curtail	APPLLPAAAAAA	1	Pychron Script	1	Fusions CO2	4	4	0	4	0	30	30	152			0	0.0095047
	24	4	59.2336	-0.0004109	0.1568	0.74716	-	99.9209	795.263	1.47267								61750-24	CM-SS4B	37	2013-07-12	20.3833	3456505000		Sanidine	33	Iain Mason	Cuba Mesa	129.138.12.160	7.875	Ar40 bk val,er = @ 7/17/13 2:26 PM @ argonlab; Parabolic @ 7/17/13 2:26 PM @ argonlab; Ar39 bk val,er = @ 7/17/13 2:26 PM @ argonlab; Average background @ 7/17/13 2:26 PM @ argonlab; Ar38 bk val,er = @ 7/17/13 2:26 PM @ argonlab; Average background @ 7/17/13 2:26 PM @ argonlab; Ar37 bk val,er = @ 7/17/13 2:26 PM @ argonlab; Average background @ 7/17/13 2:26 PM @ argonlab; Ar36 bk val,er = @ 7/17/…	80-100 Mesh #, Curtail	APPLLPAAAAAA	1	Pychron Script	1	Fusions CO2	4	4	0	4	0	30	30	145			0	0.0412881
	50	4	60.5448	0.0151179	0.0615	0.719493	33.7483	99.9716	809.827	1.28687								61750-50	CM-SS4B	37	2013-07-13	3.85	3456532000		Sanidine	33	Iain Mason	Cuba Mesa	129.138.12.160	7.875	Ar40 bk val,er = @ 7/17/13 2:26 PM @ argonlab; Parabolic @ 7/17/13 2:26 PM @ argonlab; Ar39 bk val,er = @ 7/17/13 2:26 PM @ argonlab; Average background @ 7/17/13 2:26 PM @ argonlab; Ar38 bk val,er = @ 7/17/13 2:26 PM @ argonlab; Average background @ 7/17/13 2:26 PM @ argonlab; Ar37 bk val,er = @ 7/17/13 2:26 PM @ argonlab; Average background @ 7/17/13 2:26 PM @ argonlab; Ar36 bk val,er = @ 7/17/…	80-100 Mesh #, Curtail	APPLLPAAAAAA	1	Pychron Script	1	Fusions CO2	4	4	0	4	0	30	30	171			0	0.0151728
	59	4	60.5732	-0.0288238	0.0837	0.24646	-	99.9544	810.002	4.38571								61750-59	CM-SS4B	37	2013-07-13	6.38333	3456541000		Sanidine	33	Iain Mason	Cuba Mesa	129.138.12.160	7.875	Ar40 bk val,er = @ 7/17/13 2:26 PM @ argonlab; Parabolic @ 7/17/13 2:26 PM @ argonlab; Ar39 bk val,er = @ 7/17/13 2:26 PM @ argonlab; Average background @ 7/17/13 2:26 PM @ argonlab; Ar38 bk val,er = @ 7/17/13 2:26 PM @ argonlab; Average background @ 7/17/13 2:26 PM @ argonlab; Ar37 bk val,er = @ 7/17/13 2:26 PM @ argonlab; Average background @ 7/17/13 2:26 PM @ argonlab; Ar36 bk val,er = @ 7/17/…	80-100 Mesh #, Curtail	APPLLPAAAAAA	1	Pychron Script	1	Fusions CO2	4	4	0	4	0	30	30	180			0	-0.0221348
	35	4	60.7994	0.0007018	0.0794	1.56971	726.993	99.9613	812.504	0.817444								61750-35	CM-SS4B	37	2013-07-12	23.4	3456516000		Sanidine	33	Iain Mason	Cuba Mesa	129.138.12.160	7.875	Ar40 bk val,er = @ 7/17/13 2:26 PM @ argonlab; Parabolic @ 7/17/13 2:26 PM @ argonlab; Ar39 bk val,er = @ 7/17/13 2:26 PM @ argonlab; Average background @ 7/17/13 2:26 PM @ argonlab; Ar38 bk val,er = @ 7/17/13 2:26 PM @ argonlab; Average background @ 7/17/13 2:26 PM @ argonlab; Ar37 bk val,er = @ 7/17/13 2:26 PM @ argonlab; Average background @ 7/17/13 2:26 PM @ argonlab; Ar36 bk val,er = @ 7/17/…	80-100 Mesh #, Curtail	APPLLPAAAAAA	1	Pychron Script	1	Fusions CO2	4	4	0	4	0	30	30	156			0	0.0630642
	34	4	62.517	-0.0029101	0.1895	0.428418	-	99.9095	830.602	2.50512								61750-34	CM-SS4B	37	2013-07-12	22.7667	3456514000		Sanidine	33	Iain Mason	Cuba Mesa	129.138.12.160	7.875	Ar40 bk val,er = @ 7/17/13 2:26 PM @ argonlab; Parabolic @ 7/17/13 2:26 PM @ argonlab; Ar39 bk val,er = @ 7/17/13 2:26 PM @ argonlab; Average background @ 7/17/13 2:26 PM @ argonlab; Ar38 bk val,er = @ 7/17/13 2:26 PM @ argonlab; Average background @ 7/17/13 2:26 PM @ argonlab; Ar37 bk val,er = @ 7/17/13 2:26 PM @ argonlab; Average background @ 7/17/13 2:26 PM @ argonlab; Ar36 bk val,er = @ 7/17/…	80-100 Mesh #, Curtail	APPLLPAAAAAA	1	Pychron Script	1	Fusions CO2	4	4	0	4	0	30	30	155			0	0.0039047
	02	4	63.3514	0.0152694	0.2672	0.514336	33.4135	99.8764	839.277	1.72482								61750-02	CM-SS4B	37	2013-07-12	12.9333	3456479000		Sanidine	33	Iain Mason	Cuba Mesa	129.138.12.160	7.875	Ar40 bk val,er = @ 7/17/13 2:26 PM @ argonlab; Parabolic @ 7/17/13 2:26 PM @ argonlab; Ar39 bk val,er = @ 7/17/13 2:26 PM @ argonlab; Average background @ 7/17/13 2:26 PM @ argonlab; Ar38 bk val,er = @ 7/17/13 2:26 PM @ argonlab; Average background @ 7/17/13 2:26 PM @ argonlab; Ar37 bk val,er = @ 7/17/13 2:26 PM @ argonlab; Average background @ 7/17/13 2:26 PM @ argonlab; Ar36 bk val,er = @ 7/17/…	80-100 Mesh #, Curtail	APPLLPAAAAAA	1	Pychron Script	1	Fusions CO2	4	4	0	4	0	30	30	121			0	-0.0071035
	21	4	64.0051	-0.0056346	0.2107	0.527415	-	99.9013	846.371	2.18677								61750-21	CM-SS4B	37	2013-07-12	19.7167	3456503000		Sanidine	33	Iain Mason	Cuba Mesa	129.138.12.160	7.875	Ar40 bk val,er = @ 7/17/13 2:26 PM @ argonlab; Parabolic @ 7/17/13 2:26 PM @ argonlab; Ar39 bk val,er = @ 7/17/13 2:26 PM @ argonlab; Average background @ 7/17/13 2:26 PM @ argonlab; Ar38 bk val,er = @ 7/17/13 2:26 PM @ argonlab; Average background @ 7/17/13 2:26 PM @ argonlab; Ar37 bk val,er = @ 7/17/13 2:26 PM @ argonlab; Average background @ 7/17/13 2:26 PM @ argonlab; Ar36 bk val,er = @ 7/17/…	80-100 Mesh #, Curtail	APPLLPAAAAAA	1	Pychron Script	1	Fusions CO2	4	4	0	4	0	30	30	142			0	0.0499281
	32	4	68.2096	-0.0070668	0.0306	0.758189	-	99.9858	890.955	1.44691								61750-32	CM-SS4B	37	2013-07-12	22.45	3456513000		Sanidine	33	Iain Mason	Cuba Mesa	129.138.12.160	7.875	Ar40 bk val,er = @ 7/17/13 2:26 PM @ argonlab; Parabolic @ 7/17/13 2:26 PM @ argonlab; Ar39 bk val,er = @ 7/17/13 2:26 PM @ argonlab; Average background @ 7/17/13 2:26 PM @ argonlab; Ar38 bk val,er = @ 7/17/13 2:26 PM @ argonlab; Average background @ 7/17/13 2:26 PM @ argonlab; Ar37 bk val,er = @ 7/17/13 2:26 PM @ argonlab; Average background @ 7/17/13 2:26 PM @ argonlab; Ar36 bk val,er = @ 7/17/…	80-100 Mesh #, Curtail	APPLLPAAAAAA	1	Pychron Script	1	Fusions CO2	4	4	0	4	0	30	30	153			0	0.0063047
	47	4	69.6316	0.0006588	0.0373	0.986432	774.444	99.9842	905.597	1.33947								61750-47	CM-SS4B	37	2013-07-13	2.95	3456529000		Sanidine	33	Iain Mason	Cuba Mesa	129.138.12.160	7.875	Ar40 bk val,er = @ 7/17/13 2:26 PM @ argonlab; Parabolic @ 7/17/13 2:26 PM @ argonlab; Ar39 bk val,er = @ 7/17/13 2:26 PM @ argonlab; Average background @ 7/17/13 2:26 PM @ argonlab; Ar38 bk val,er = @ 7/17/13 2:26 PM @ argonlab; Average background @ 7/17/13 2:26 PM @ argonlab; Ar37 bk val,er = @ 7/17/13 2:26 PM @ argonlab; Average background @ 7/17/13 2:26 PM @ argonlab; Ar36 bk val,er = @ 7/17/…	80-100 Mesh #, Curtail	APPLLPAAAAAA	1	Pychron Script	1	Fusions CO2	4	4	0	4	0	30	30	168			0	0.0147501
	05	4	79.4709	-0.0005062	0.0944	1.26952	-	99.9648	1003.72	1.06685								61750-05	CM-SS4B	37	2013-07-12	13.3833	3456480000		Sanidine	33	Iain Mason	Cuba Mesa	129.138.12.160	7.875	Ar40 bk val,er = @ 7/17/13 2:26 PM @ argonlab; Parabolic @ 7/17/13 2:26 PM @ argonlab; Ar39 bk val,er = @ 7/17/13 2:26 PM @ argonlab; Average background @ 7/17/13 2:26 PM @ argonlab; Ar38 bk val,er = @ 7/17/13 2:26 PM @ argonlab; Average background @ 7/17/13 2:26 PM @ argonlab; Ar37 bk val,er = @ 7/17/13 2:26 PM @ argonlab; Average background @ 7/17/13 2:26 PM @ argonlab; Ar36 bk val,er = @ 7/17/…	80-100 Mesh #, Curtail	APPLLPAAAAAA	1	Pychron Script	1	Fusions CO2	4	4	0	4	0	30	30	124			0	0.0408965
	63	4	80.758	0.0027983	0.0881	1.67302	182.326	99.9679	1016.21	0.977626								61750-63	CM-SS4B	37	2013-07-13	7.81667	3456547000		Sanidine	33	Iain Mason	Cuba Mesa	129.138.12.160	7.875	Ar40 bk val,er = @ 7/17/13 2:26 PM @ argonlab; Parabolic @ 7/17/13 2:26 PM @ argonlab; Ar39 bk val,er = @ 7/17/13 2:26 PM @ argonlab; Average background @ 7/17/13 2:26 PM @ argonlab; Ar38 bk val,er = @ 7/17/13 2:26 PM @ argonlab; Average background @ 7/17/13 2:26 PM @ argonlab; Ar37 bk val,er = @ 7/17/13 2:26 PM @ argonlab; Average background @ 7/17/13 2:26 PM @ argonlab; Ar36 bk val,er = @ 7/17/…	80-100 Mesh #, Curtail	APPLLPAAAAAA	1	Pychron Script	1	Fusions CO2	4	4	0	4	0	30	30	184			0	0.0950214
	19	4	83.516	-0.0069184	0.0604	0.790912	-	99.9778	1042.73	1.56271								61750-19	CM-SS4B	37	2013-07-12	18.9833	3456500000		Sanidine	33	Iain Mason	Cuba Mesa	129.138.12.160	7.875	Ar40 bk val,er = @ 7/17/13 2:26 PM @ argonlab; Parabolic @ 7/17/13 2:26 PM @ argonlab; Ar39 bk val,er = @ 7/17/13 2:26 PM @ argonlab; Average background @ 7/17/13 2:26 PM @ argonlab; Ar38 bk val,er = @ 7/17/13 2:26 PM @ argonlab; Average background @ 7/17/13 2:26 PM @ argonlab; Ar37 bk val,er = @ 7/17/13 2:26 PM @ argonlab; Average background @ 7/17/13 2:26 PM @ argonlab; Ar36 bk val,er = @ 7/17/…	80-100 Mesh #, Curtail	APPLLPAAAAAA	1	Pychron Script	1	Fusions CO2	4	4	0	4	0	30	30	140			0	0.0360079
	38	4	87.2125	0.0038416	0.0394	0.687809	132.81	99.9868	1077.66	2.07071								61750-38	CM-SS4B	37	2013-07-13	0.2	3456519000		Sanidine	33	Iain Mason	Cuba Mesa	129.138.12.160	7.875	Ar40 bk val,er = @ 7/17/13 2:26 PM @ argonlab; Parabolic @ 7/17/13 2:26 PM @ argonlab; Ar39 bk val,er = @ 7/17/13 2:26 PM @ argonlab; Average background @ 7/17/13 2:26 PM @ argonlab; Ar38 bk val,er = @ 7/17/13 2:26 PM @ argonlab; Average background @ 7/17/13 2:26 PM @ argonlab; Ar37 bk val,er = @ 7/17/13 2:26 PM @ argonlab; Average background @ 7/17/13 2:26 PM @ argonlab; Ar36 bk val,er = @ 7/17/…	80-100 Mesh #, Curtail	APPLLPAAAAAA	1	Pychron Script	1	Fusions CO2	4	4	0	4	0	30	30	159			0	0.0428642
	56	4	92.9184	0.0027604	0.0241	0.949921	184.83	99.9927	1130.24	1.63859								61750-56	CM-SS4B	37	2013-07-13	5.91667	3456540000		Sanidine	33	Iain Mason	Cuba Mesa	129.138.12.160	7.875	Ar40 bk val,er = @ 7/17/13 2:26 PM @ argonlab; Parabolic @ 7/17/13 2:26 PM @ argonlab; Ar39 bk val,er = @ 7/17/13 2:26 PM @ argonlab; Average background @ 7/17/13 2:26 PM @ argonlab; Ar38 bk val,er = @ 7/17/13 2:26 PM @ argonlab; Average background @ 7/17/13 2:26 PM @ argonlab; Ar37 bk val,er = @ 7/17/13 2:26 PM @ argonlab; Average background @ 7/17/13 2:26 PM @ argonlab; Ar36 bk val,er = @ 7/17/…	80-100 Mesh #, Curtail	APPLLPAAAAAA	1	Pychron Script	1	Fusions CO2	4	4	0	4	0	30	30	177			0	0.0491652
	28	4	95.5171	0.0065516	0.1686	0.834389	77.8747	99.948	1153.3	1.84262								61750-28	CM-SS4B	37	2013-07-12	21.4167	3456509000		Sanidine	33	Iain Mason	Cuba Mesa	129.138.12.160	7.875	Ar40 bk val,er = @ 7/17/13 2:26 PM @ argonlab; Parabolic @ 7/17/13 2:26 PM @ argonlab; Ar39 bk val,er = @ 7/17/13 2:26 PM @ argonlab; Average background @ 7/17/13 2:26 PM @ argonlab; Ar38 bk val,er = @ 7/17/13 2:26 PM @ argonlab; Average background @ 7/17/13 2:26 PM @ argonlab; Ar37 bk val,er = @ 7/17/13 2:26 PM @ argonlab; Average background @ 7/17/13 2:26 PM @ argonlab; Ar36 bk val,er = @ 7/17/…	80-100 Mesh #, Curtail	APPLLPAAAAAA	1	Pychron Script	1	Fusions CO2	4	4	0	4	0	30	30	149			0	0.0399347
	14	4	118.579	0.0101014	-0.0143	0.770694	50.5082	100.004	1349.59	1.92197								61750-14	CM-SS4B	37	2013-07-12	17.2667	3456494000		Sanidine	33	Iain Mason	Cuba Mesa	129.138.12.160	7.875	Ar40 bk val,er = @ 7/17/13 2:26 PM @ argonlab; Parabolic @ 7/17/13 2:26 PM @ argonlab; Ar39 bk val,er = @ 7/17/13 2:26 PM @ argonlab; Average background @ 7/17/13 2:26 PM @ argonlab; Ar38 bk val,er = @ 7/17/13 2:26 PM @ argonlab; Average background @ 7/17/13 2:26 PM @ argonlab; Ar37 bk val,er = @ 7/17/13 2:26 PM @ argonlab; Average background @ 7/17/13 2:26 PM @ argonlab; Ar36 bk val,er = @ 7/17/…	80-100 Mesh #, Curtail	APPLLPAAAAAA	1	Pychron Script	1	Fusions CO2	4	4	0	4	0	30	30	134			0	0.0631079
	67	4	119.461	-0.0016786	0.0694	0.768658	-	99.9827	1356.47	1.99468								61750-67	CM-SS4B	37	2013-07-13	9.33333	3456552000		Sanidine	33	Iain Mason	Cuba Mesa	129.138.12.160	7.875	Ar40 bk val,er = @ 7/17/13 2:26 PM @ argonlab; Parabolic @ 7/17/13 2:26 PM @ argonlab; Ar39 bk val,er = @ 7/17/13 2:26 PM @ argonlab; Average background @ 7/17/13 2:26 PM @ argonlab; Ar38 bk val,er = @ 7/17/13 2:26 PM @ argonlab; Average background @ 7/17/13 2:26 PM @ argonlab; Ar37 bk val,er = @ 7/17/13 2:26 PM @ argonlab; Average background @ 7/17/13 2:26 PM @ argonlab; Ar36 bk val,er = @ 7/17/…	80-100 Mesh #, Curtail	APPLLPAAAAAA	1	Pychron Script	1	Fusions CO2	4	4	0	4	0	30	30	188			0	0.0435214
	CM-SS4, Sanidine, J=0.0091461±0.01%, IC=1.055411±0.0001298, NM-258E, Lab#=61744, Argus VI
	99	4	4.39326	-0.0160365	0.0915	0.914713	-	99.348	71.53	0.135993								61744-99	CM-SS4B	37	2013-08-20	6.55	3459825000		Sanidine	4	Iain Mason	Cuba Mesa	129.138.12.160	7.875	H2 Baseline = A @ 8/21/13 9:25 AM @ argonlab; H1 Baseline = A @ 8/21/13 9:25 AM @ argonlab; AX Baseline = A @ 8/21/13 9:25 AM @ argonlab; L1 Baseline = A @ 8/21/13 9:25 AM @ argonlab; L2 Baseline = A @ 8/21/13 9:25 AM @ argonlab; CDD Baseline = A @ 8/21/13 9:25 AM @ argonlab; Ar41 = A @ 8/21/13 9:25 AM @ argonlab; Ar40 = P @ 8/21/13 9:25 AM @ argonlab; Ar39 = P @ 8/21/13 9:25 AM @ argonlab; Ar38 …	Hole 04 (04)	ALLLLLAAAAAA	1	Pychron Script	1	Fusions CO2	4	4	0	4	0	30	30	109			0	0.0351417
	11	4	4.52943	0.0236406	0.0348	0.521931	21.5817	99.8078	74.043	0.215889								61744-11	CM-SS4B	37	2013-08-19	15.35	3459771000		Sanidine	4	Iain Mason	Cuba Mesa	129.138.12.160	7.875	H2 Baseline = A @ 8/21/13 9:24 AM @ argonlab; H1 Baseline = A @ 8/21/13 9:24 AM @ argonlab; AX Baseline = A @ 8/21/13 9:24 AM @ argonlab; L1 Baseline = A @ 8/21/13 9:24 AM @ argonlab; L2 Baseline = A @ 8/21/13 9:24 AM @ argonlab; CDD Baseline = A @ 8/21/13 9:24 AM @ argonlab; Ar41 = A @ 8/21/13 9:24 AM @ argonlab; Ar40 = P @ 8/21/13 9:24 AM @ argonlab; Ar39 = P @ 8/21/13 9:24 AM @ argonlab; Ar38 …	Hole 04 (04)	ALLLLLAAAAAA	1	Pychron Script	1	Fusions CO2	4	4	0	4	0	30	30	17			0	0.0007923
	09	4	4.62513	0.0848653	0.0326	0.269441	6.01193	99.9308	75.6723	0.433397								61744-09	CM-SS4B	37	2013-08-19	15.15	3459770000		Sanidine	4	Iain Mason	Cuba Mesa	129.138.12.160	7.875	H2 Baseline = A @ 8/21/13 9:24 AM @ argonlab; H1 Baseline = A @ 8/21/13 9:24 AM @ argonlab; AX Baseline = A @ 8/21/13 9:24 AM @ argonlab; L1 Baseline = A @ 8/21/13 9:24 AM @ argonlab; L2 Baseline = A @ 8/21/13 9:24 AM @ argonlab; CDD Baseline = A @ 8/21/13 9:24 AM @ argonlab; Ar41 = A @ 8/21/13 9:24 AM @ argonlab; Ar40 = P @ 8/21/13 9:24 AM @ argonlab; Ar39 = P @ 8/21/13 9:24 AM @ argonlab; Ar38 …	Hole 04 (04)	ALLLLLAAAAAA	1	Pychron Script	1	Fusions CO2	4	4	0	4	0	30	30	15			0	0.0009123
	92	4	4.71256	0.0316314	0.0109	0.440546	16.1297	99.9899	77.1174	0.256608								61744-92	CM-SS4B	37	2013-08-20	5.81667	3459823000		Sanidine	4	Iain Mason	Cuba Mesa	129.138.12.160	7.875	H2 Baseline = A @ 8/21/13 9:25 AM @ argonlab; H1 Baseline = A @ 8/21/13 9:25 AM @ argonlab; AX Baseline = A @ 8/21/13 9:25 AM @ argonlab; L1 Baseline = A @ 8/21/13 9:25 AM @ argonlab; L2 Baseline = A @ 8/21/13 9:25 AM @ argonlab; CDD Baseline = A @ 8/21/13 9:25 AM @ argonlab; Ar41 = A @ 8/21/13 9:25 AM @ argonlab; Ar40 = P @ 8/21/13 9:25 AM @ argonlab; Ar39 = P @ 8/21/13 9:25 AM @ argonlab; Ar38 …	Hole 04 (04)	ALLLLLAAAAAA	1	Pychron Script	1	Fusions CO2	4	4	0	4	0	30	30	102			0	0.0102417
	45	4	4.92294	-0.244825	0.3657	0.0419711	-	97.4233	78.4546	2.62502								61744-45	CM-SS4B	37	2013-08-19	21.0833	3459791000		Sanidine	4	Iain Mason	Cuba Mesa	129.138.12.160	7.875	H2 Baseline = A @ 8/21/13 9:25 AM @ argonlab; H1 Baseline = A @ 8/21/13 9:25 AM @ argonlab; AX Baseline = A @ 8/21/13 9:25 AM @ argonlab; L1 Baseline = A @ 8/21/13 9:25 AM @ argonlab; L2 Baseline = A @ 8/21/13 9:25 AM @ argonlab; CDD Baseline = A @ 8/21/13 9:25 AM @ argonlab; Ar41 = A @ 8/21/13 9:25 AM @ argonlab; Ar40 = P @ 8/21/13 9:25 AM @ argonlab; Ar39 = P @ 8/21/13 9:25 AM @ argonlab; Ar38 …	Hole 04 (04)	ALLLLLAAAAAA	1	Pychron Script	1	Fusions CO2	4	4	0	4	0	30	30	51			0	0.0025182
	46	4	5.55722	0.0126062	0.0917	0.176626	40.4725	99.5162	90.2042	0.729061								61744-46	CM-SS4B	37	2013-08-19	21.4	3459792000		Sanidine	4	Iain Mason	Cuba Mesa	129.138.12.160	7.875	H2 Baseline = A @ 8/21/13 9:25 AM @ argonlab; H1 Baseline = A @ 8/21/13 9:25 AM @ argonlab; AX Baseline = A @ 8/21/13 9:25 AM @ argonlab; L1 Baseline = A @ 8/21/13 9:25 AM @ argonlab; L2 Baseline = A @ 8/21/13 9:25 AM @ argonlab; CDD Baseline = A @ 8/21/13 9:25 AM @ argonlab; Ar41 = A @ 8/21/13 9:25 AM @ argonlab; Ar40 = P @ 8/21/13 9:25 AM @ argonlab; Ar39 = P @ 8/21/13 9:25 AM @ argonlab; Ar38 …	Hole 04 (04)	ALLLLLAAAAAA	1	Pychron Script	1	Fusions CO2	4	4	0	4	0	30	30	52			0	-0.0259818
	80	4	5.9423	-0.0023157	0.1049	0.416204	-	99.4665	96.2535	0.394027								61744-80	CM-SS4B	37	2013-08-20	3.26667	3459813000		Sanidine	4	Iain Mason	Cuba Mesa	129.138.12.160	7.875	H2 Baseline = A @ 8/21/13 9:25 AM @ argonlab; H1 Baseline = A @ 8/21/13 9:25 AM @ argonlab; AX Baseline = A @ 8/21/13 9:25 AM @ argonlab; L1 Baseline = A @ 8/21/13 9:25 AM @ argonlab; L2 Baseline = A @ 8/21/13 9:25 AM @ argonlab; CDD Baseline = A @ 8/21/13 9:25 AM @ argonlab; Ar41 = A @ 8/21/13 9:25 AM @ argonlab; Ar40 = P @ 8/21/13 9:25 AM @ argonlab; Ar39 = P @ 8/21/13 9:25 AM @ argonlab; Ar38 …	Hole 04 (04)	ALLLLLAAAAAA	1	Pychron Script	1	Fusions CO2	4	4	0	4	0	30	30	90			0	-0.0010212
	03	4	6.00489	-0.0244808	0.1301	0.328196	-	99.323	97.1041	0.426384								61744-03	CM-SS4B	37	2013-08-19	13.8667	3459765000		Sanidine	4	Iain Mason	Cuba Mesa	129.138.12.160	7.875	H2 Baseline = A @ 8/21/13 9:24 AM @ argonlab; H1 Baseline = A @ 8/21/13 9:24 AM @ argonlab; AX Baseline = A @ 8/21/13 9:24 AM @ argonlab; L1 Baseline = A @ 8/21/13 9:24 AM @ argonlab; L2 Baseline = A @ 8/21/13 9:24 AM @ argonlab; CDD Baseline = A @ 8/21/13 9:24 AM @ argonlab; Ar41 = A @ 8/21/13 9:24 AM @ argonlab; Ar40 = P @ 8/21/13 9:24 AM @ argonlab; Ar39 = P @ 8/21/13 9:24 AM @ argonlab; Ar38 …	Hole 04 (04)	ALLLLLAAAAAA	1	Pychron Script	1	Fusions CO2	4	4	0	4	0	30	30	9			0	0.0124024
	04	4	6.11386	0.0056148	0.0387	0.757968	90.8677	99.8157	99.3008	0.163985								61744-04	CM-SS4B	37	2013-08-19	13.9667	3459766000		Sanidine	4	Iain Mason	Cuba Mesa	129.138.12.160	7.875	H2 Baseline = A @ 8/21/13 9:24 AM @ argonlab; H1 Baseline = A @ 8/21/13 9:24 AM @ argonlab; AX Baseline = A @ 8/21/13 9:24 AM @ argonlab; L1 Baseline = A @ 8/21/13 9:24 AM @ argonlab; L2 Baseline = A @ 8/21/13 9:24 AM @ argonlab; CDD Baseline = A @ 8/21/13 9:24 AM @ argonlab; Ar41 = A @ 8/21/13 9:24 AM @ argonlab; Ar40 = P @ 8/21/13 9:24 AM @ argonlab; Ar39 = P @ 8/21/13 9:24 AM @ argonlab; Ar38 …	Hole 04 (04)	ALLLLLAAAAAA	1	Pychron Script	1	Fusions CO2	4	4	0	4	0	30	30	10			0	-0.0515976
	86	4	6.31493	0.0050544	0.0512	0.790809	100.943	99.7618	102.427	0.184868								61744-86	CM-SS4B	37	2013-08-20	4.53333	3459818000		Sanidine	4	Iain Mason	Cuba Mesa	129.138.12.160	7.875	H2 Baseline = A @ 8/21/13 9:25 AM @ argonlab; H1 Baseline = A @ 8/21/13 9:25 AM @ argonlab; AX Baseline = A @ 8/21/13 9:25 AM @ argonlab; L1 Baseline = A @ 8/21/13 9:25 AM @ argonlab; L2 Baseline = A @ 8/21/13 9:25 AM @ argonlab; CDD Baseline = A @ 8/21/13 9:25 AM @ argonlab; Ar41 = A @ 8/21/13 9:25 AM @ argonlab; Ar40 = P @ 8/21/13 9:25 AM @ argonlab; Ar39 = P @ 8/21/13 9:25 AM @ argonlab; Ar38 …	Hole 04 (04)	ALLLLLAAAAAA	1	Pychron Script	1	Fusions CO2	4	4	0	4	0	30	30	96			0	0.0412655
	26	4	6.5983	0.0206161	0.0636	0.702539	24.7478	99.7378	106.873	0.229536								61744-26	CM-SS4B	37	2013-08-19	18	3459780000		Sanidine	4	Iain Mason	Cuba Mesa	129.138.12.160	7.875	H2 Baseline = A @ 8/21/13 9:25 AM @ argonlab; H1 Baseline = A @ 8/21/13 9:25 AM @ argonlab; AX Baseline = A @ 8/21/13 9:25 AM @ argonlab; L1 Baseline = A @ 8/21/13 9:25 AM @ argonlab; L2 Baseline = A @ 8/21/13 9:25 AM @ argonlab; CDD Baseline = A @ 8/21/13 9:25 AM @ argonlab; Ar41 = A @ 8/21/13 9:25 AM @ argonlab; Ar40 = P @ 8/21/13 9:25 AM @ argonlab; Ar39 = P @ 8/21/13 9:25 AM @ argonlab; Ar38 …	Hole 04 (04)	ALLLLLAAAAAA	1	Pychron Script	1	Fusions CO2	4	4	0	4	0	30	30	32			0	0.0300733
	05	4	6.91316	-0.0045042	0.058	1.31535	-	99.7436	111.83	0.144935								61744-05	CM-SS4B	37	2013-08-19	14.0833	3459766000		Sanidine	4	Iain Mason	Cuba Mesa	129.138.12.160	7.875	H2 Baseline = A @ 8/21/13 9:24 AM @ argonlab; H1 Baseline = A @ 8/21/13 9:24 AM @ argonlab; AX Baseline = A @ 8/21/13 9:24 AM @ argonlab; L1 Baseline = A @ 8/21/13 9:24 AM @ argonlab; L2 Baseline = A @ 8/21/13 9:24 AM @ argonlab; CDD Baseline = A @ 8/21/13 9:24 AM @ argonlab; Ar41 = A @ 8/21/13 9:24 AM @ argonlab; Ar40 = P @ 8/21/13 9:24 AM @ argonlab; Ar39 = P @ 8/21/13 9:24 AM @ argonlab; Ar38 …	Hole 04 (04)	ALLLLLAAAAAA	1	Pychron Script	1	Fusions CO2	4	4	0	4	0	30	30	11			0	0.0505024
	19	4	6.98407	0.0671667	0.2135	0.320087	7.59609	99.1735	112.323	0.503242								61744-19	CM-SS4B	37	2013-08-19	16.8333	3459776000		Sanidine	4	Iain Mason	Cuba Mesa	129.138.12.160	7.875	H2 Baseline = A @ 8/21/13 9:24 AM @ argonlab; H1 Baseline = A @ 8/21/13 9:24 AM @ argonlab; AX Baseline = A @ 8/21/13 9:24 AM @ argonlab; L1 Baseline = A @ 8/21/13 9:24 AM @ argonlab; L2 Baseline = A @ 8/21/13 9:24 AM @ argonlab; CDD Baseline = A @ 8/21/13 9:24 AM @ argonlab; Ar41 = A @ 8/21/13 9:24 AM @ argonlab; Ar40 = P @ 8/21/13 9:24 AM @ argonlab; Ar39 = P @ 8/21/13 9:24 AM @ argonlab; Ar38 …	Hole 04 (04)	ALLLLLAAAAAA	1	Pychron Script	1	Fusions CO2	4	4	0	4	0	30	30	25			0	0.0233632
	41	4	8.8677	0.432478	0.4491	0.0335541	1.17972	98.8477	141.089	5.96996								61744-41	CM-SS4B	37	2013-08-19	20.6667	3459790000		Sanidine	4	Iain Mason	Cuba Mesa	129.138.12.160	7.875	H2 Baseline = A @ 8/21/13 9:25 AM @ argonlab; H1 Baseline = A @ 8/21/13 9:25 AM @ argonlab; AX Baseline = A @ 8/21/13 9:25 AM @ argonlab; L1 Baseline = A @ 8/21/13 9:25 AM @ argonlab; L2 Baseline = A @ 8/21/13 9:25 AM @ argonlab; CDD Baseline = A @ 8/21/13 9:25 AM @ argonlab; Ar41 = A @ 8/21/13 9:25 AM @ argonlab; Ar40 = P @ 8/21/13 9:25 AM @ argonlab; Ar39 = P @ 8/21/13 9:25 AM @ argonlab; Ar38 …	Hole 04 (04)	ALLLLLAAAAAA	1	Pychron Script	1	Fusions CO2	4	4	0	4	0	30	30	47			0	-0.0192818
	69	4	9.32742	0.106234	0.0398	0.215439	4.80266	99.9551	149.683	1.05471								61744-69	CM-SS4B	37	2013-08-20	1.35	3459806000		Sanidine	4	Iain Mason	Cuba Mesa	129.138.12.160	7.875	H2 Baseline = A @ 8/21/13 9:25 AM @ argonlab; H1 Baseline = A @ 8/21/13 9:25 AM @ argonlab; AX Baseline = A @ 8/21/13 9:25 AM @ argonlab; L1 Baseline = A @ 8/21/13 9:25 AM @ argonlab; L2 Baseline = A @ 8/21/13 9:25 AM @ argonlab; CDD Baseline = A @ 8/21/13 9:25 AM @ argonlab; Ar41 = A @ 8/21/13 9:25 AM @ argonlab; Ar40 = P @ 8/21/13 9:25 AM @ argonlab; Ar39 = P @ 8/21/13 9:25 AM @ argonlab; Ar38 …	Hole 04 (04)	ALLLLLAAAAAA	1	Pychron Script	1	Fusions CO2	4	4	0	4	0	30	30	79			0	0.0685151
	01	4	9.69544	-0.0154702	0.0906	0.721683	-	99.7101	154.973	0.287072								61744-01	CM-SS4B	37	2013-08-19	13.6667	3459764000		Sanidine	4	Iain Mason	Cuba Mesa	129.138.12.160	7.875	H2 Baseline = A @ 8/21/13 9:24 AM @ argonlab; H1 Baseline = A @ 8/21/13 9:24 AM @ argonlab; AX Baseline = A @ 8/21/13 9:24 AM @ argonlab; L1 Baseline = A @ 8/21/13 9:24 AM @ argonlab; L2 Baseline = A @ 8/21/13 9:24 AM @ argonlab; CDD Baseline = A @ 8/21/13 9:24 AM @ argonlab; Ar41 = A @ 8/21/13 9:24 AM @ argonlab; Ar40 = P @ 8/21/13 9:24 AM @ argonlab; Ar39 = P @ 8/21/13 9:24 AM @ argonlab; Ar38 …	Hole 04 (04)	ALLLLLAAAAAA	1	Pychron Script	1	Fusions CO2	4	4	0	4	0	30	30	7			0	0.0257024
	78	4	9.93521	0.029471	0.22	0.609565	17.3121	99.3652	158.126	0.392177								61744-78	CM-SS4B	37	2013-08-20	3.05	3459813000		Sanidine	4	Iain Mason	Cuba Mesa	129.138.12.160	7.875	H2 Baseline = A @ 8/21/13 9:25 AM @ argonlab; H1 Baseline = A @ 8/21/13 9:25 AM @ argonlab; AX Baseline = A @ 8/21/13 9:25 AM @ argonlab; L1 Baseline = A @ 8/21/13 9:25 AM @ argonlab; L2 Baseline = A @ 8/21/13 9:25 AM @ argonlab; CDD Baseline = A @ 8/21/13 9:25 AM @ argonlab; Ar41 = A @ 8/21/13 9:25 AM @ argonlab; Ar40 = P @ 8/21/13 9:25 AM @ argonlab; Ar39 = P @ 8/21/13 9:25 AM @ argonlab; Ar38 …	Hole 04 (04)	ALLLLLAAAAAA	1	Pychron Script	1	Fusions CO2	4	4	0	4	0	30	30	88			0	0.0171588
	75	4	10.1083	0.0223807	0.5827	0.456494	22.7966	98.2959	159.108	0.448482								61744-75	CM-SS4B	37	2013-08-20	2.51667	3459811000		Sanidine	4	Iain Mason	Cuba Mesa	129.138.12.160	7.875	H2 Baseline = A @ 8/21/13 9:25 AM @ argonlab; H1 Baseline = A @ 8/21/13 9:25 AM @ argonlab; AX Baseline = A @ 8/21/13 9:25 AM @ argonlab; L1 Baseline = A @ 8/21/13 9:25 AM @ argonlab; L2 Baseline = A @ 8/21/13 9:25 AM @ argonlab; CDD Baseline = A @ 8/21/13 9:25 AM @ argonlab; Ar41 = A @ 8/21/13 9:25 AM @ argonlab; Ar40 = P @ 8/21/13 9:25 AM @ argonlab; Ar39 = P @ 8/21/13 9:25 AM @ argonlab; Ar38 …	Hole 04 (04)	ALLLLLAAAAAA	1	Pychron Script	1	Fusions CO2	4	4	0	4	0	30	30	85			0	0.0191951
	87	4	10.1768	0.0025508	0.1356	0.851112	200.017	99.6015	162.174	0.330704								61744-87	CM-SS4B	37	2013-08-20	4.65	3459818000		Sanidine	4	Iain Mason	Cuba Mesa	129.138.12.160	7.875	H2 Baseline = A @ 8/21/13 9:25 AM @ argonlab; H1 Baseline = A @ 8/21/13 9:25 AM @ argonlab; AX Baseline = A @ 8/21/13 9:25 AM @ argonlab; L1 Baseline = A @ 8/21/13 9:25 AM @ argonlab; L2 Baseline = A @ 8/21/13 9:25 AM @ argonlab; CDD Baseline = A @ 8/21/13 9:25 AM @ argonlab; Ar41 = A @ 8/21/13 9:25 AM @ argonlab; Ar40 = P @ 8/21/13 9:25 AM @ argonlab; Ar39 = P @ 8/21/13 9:25 AM @ argonlab; Ar38 …	Hole 04 (04)	ALLLLLAAAAAA	1	Pychron Script	1	Fusions CO2	4	4	0	4	0	30	30	97			0	0.0086655
	44	4	10.2958	-0.0082806	-0.00162854	0.363918	-	99.9994	164.614	0.695169								61744-44	CM-SS4B	37	2013-08-19	20.9833	3459791000		Sanidine	4	Iain Mason	Cuba Mesa	129.138.12.160	7.875	H2 Baseline = A @ 8/21/13 9:25 AM @ argonlab; H1 Baseline = A @ 8/21/13 9:25 AM @ argonlab; AX Baseline = A @ 8/21/13 9:25 AM @ argonlab; L1 Baseline = A @ 8/21/13 9:25 AM @ argonlab; L2 Baseline = A @ 8/21/13 9:25 AM @ argonlab; CDD Baseline = A @ 8/21/13 9:25 AM @ argonlab; Ar41 = A @ 8/21/13 9:25 AM @ argonlab; Ar40 = P @ 8/21/13 9:25 AM @ argonlab; Ar39 = P @ 8/21/13 9:25 AM @ argonlab; Ar38 …	Hole 04 (04)	ALLLLLAAAAAA	1	Pychron Script	1	Fusions CO2	4	4	0	4	0	30	30	50			0	-0.0324818
	24	4	10.3353	0.0389525	0.0543	0.351533	13.0981	99.871	165.02	0.545345								61744-24	CM-SS4B	37	2013-08-19	17.5833	3459779000		Sanidine	4	Iain Mason	Cuba Mesa	129.138.12.160	7.875	H2 Baseline = A @ 8/21/13 9:25 AM @ argonlab; H1 Baseline = A @ 8/21/13 9:25 AM @ argonlab; AX Baseline = A @ 8/21/13 9:25 AM @ argonlab; L1 Baseline = A @ 8/21/13 9:25 AM @ argonlab; L2 Baseline = A @ 8/21/13 9:25 AM @ argonlab; CDD Baseline = A @ 8/21/13 9:25 AM @ argonlab; Ar41 = A @ 8/21/13 9:25 AM @ argonlab; Ar40 = P @ 8/21/13 9:25 AM @ argonlab; Ar39 = P @ 8/21/13 9:25 AM @ argonlab; Ar38 …	Hole 04 (04)	ALLLLLAAAAAA	1	Pychron Script	1	Fusions CO2	4	4	0	4	0	30	30	30			0	0.0180733
	10	4	10.393	0.0154394	0.0572	0.660038	33.0456	99.8469	165.861	0.353222								61744-10	CM-SS4B	37	2013-08-19	15.25	3459770000		Sanidine	4	Iain Mason	Cuba Mesa	129.138.12.160	7.875	H2 Baseline = A @ 8/21/13 9:24 AM @ argonlab; H1 Baseline = A @ 8/21/13 9:24 AM @ argonlab; AX Baseline = A @ 8/21/13 9:24 AM @ argonlab; L1 Baseline = A @ 8/21/13 9:24 AM @ argonlab; L2 Baseline = A @ 8/21/13 9:24 AM @ argonlab; CDD Baseline = A @ 8/21/13 9:24 AM @ argonlab; Ar41 = A @ 8/21/13 9:24 AM @ argonlab; Ar40 = P @ 8/21/13 9:24 AM @ argonlab; Ar39 = P @ 8/21/13 9:24 AM @ argonlab; Ar38 …	Hole 04 (04)	ALLLLLAAAAAA	1	Pychron Script	1	Fusions CO2	4	4	0	4	0	30	30	16			0	0.0137123
	62	4	11.8548	-0.0045505	0.054	0.671511	-	99.8612	188.068	0.464997								61744-62	CM-SS4B	37	2013-08-20	0.183333	3459802000		Sanidine	4	Iain Mason	Cuba Mesa	129.138.12.160	7.875	H2 Baseline = A @ 8/21/13 9:25 AM @ argonlab; H1 Baseline = A @ 8/21/13 9:25 AM @ argonlab; AX Baseline = A @ 8/21/13 9:25 AM @ argonlab; L1 Baseline = A @ 8/21/13 9:25 AM @ argonlab; L2 Baseline = A @ 8/21/13 9:25 AM @ argonlab; CDD Baseline = A @ 8/21/13 9:25 AM @ argonlab; Ar41 = A @ 8/21/13 9:25 AM @ argonlab; Ar40 = P @ 8/21/13 9:25 AM @ argonlab; Ar39 = P @ 8/21/13 9:25 AM @ argonlab; Ar38 …	Hole 04 (04)	ALLLLLAAAAAA	1	Pychron Script	1	Fusions CO2	4	4	0	4	0	30	30	72			0	0.0344438
	95	4	12.271	-0.0193262	1.1582	0.414187	-	97.1727	189.364	0.707508								61744-95	CM-SS4B	37	2013-08-20	6.13333	3459824000		Sanidine	4	Iain Mason	Cuba Mesa	129.138.12.160	7.875	H2 Baseline = A @ 8/21/13 9:25 AM @ argonlab; H1 Baseline = A @ 8/21/13 9:25 AM @ argonlab; AX Baseline = A @ 8/21/13 9:25 AM @ argonlab; L1 Baseline = A @ 8/21/13 9:25 AM @ argonlab; L2 Baseline = A @ 8/21/13 9:25 AM @ argonlab; CDD Baseline = A @ 8/21/13 9:25 AM @ argonlab; Ar41 = A @ 8/21/13 9:25 AM @ argonlab; Ar40 = P @ 8/21/13 9:25 AM @ argonlab; Ar39 = P @ 8/21/13 9:25 AM @ argonlab; Ar38 …	Hole 04 (04)	ALLLLLAAAAAA	1	Pychron Script	1	Fusions CO2	4	4	0	4	0	30	30	105			0	0.0156417
	51	4	12.0722	0.0437957	0.2078	0.582275	11.6496	99.5161	190.724	0.408698								61744-51	CM-SS4B	37	2013-08-19	22.15	3459795000		Sanidine	4	Iain Mason	Cuba Mesa	129.138.12.160	7.875	H2 Baseline = A @ 8/21/13 9:25 AM @ argonlab; H1 Baseline = A @ 8/21/13 9:25 AM @ argonlab; AX Baseline = A @ 8/21/13 9:25 AM @ argonlab; L1 Baseline = A @ 8/21/13 9:25 AM @ argonlab; L2 Baseline = A @ 8/21/13 9:25 AM @ argonlab; CDD Baseline = A @ 8/21/13 9:25 AM @ argonlab; Ar41 = A @ 8/21/13 9:25 AM @ argonlab; Ar40 = P @ 8/21/13 9:25 AM @ argonlab; Ar39 = P @ 8/21/13 9:25 AM @ argonlab; Ar38 …	Hole 04 (04)	ALLLLLAAAAAA	1	Pychron Script	1	Fusions CO2	4	4	0	4	0	30	30	57			0	0.0219625
	18	4	12.1369	0.0054898	0.0652	0.770638	92.9367	99.8441	192.289	0.367906								61744-18	CM-SS4B	37	2013-08-19	16.5167	3459775000		Sanidine	4	Iain Mason	Cuba Mesa	129.138.12.160	7.875	H2 Baseline = A @ 8/21/13 9:24 AM @ argonlab; H1 Baseline = A @ 8/21/13 9:24 AM @ argonlab; AX Baseline = A @ 8/21/13 9:24 AM @ argonlab; L1 Baseline = A @ 8/21/13 9:24 AM @ argonlab; L2 Baseline = A @ 8/21/13 9:24 AM @ argonlab; CDD Baseline = A @ 8/21/13 9:24 AM @ argonlab; Ar41 = A @ 8/21/13 9:24 AM @ argonlab; Ar40 = P @ 8/21/13 9:24 AM @ argonlab; Ar39 = P @ 8/21/13 9:24 AM @ argonlab; Ar38 …	Hole 04 (04)	ALLLLLAAAAAA	1	Pychron Script	1	Fusions CO2	4	4	0	4	0	30	30	24			0	-0.0212368
	35	4	12.1728	-0.0523478	0.0836	0.177704	-	99.7579	192.666	1.28994								61744-35	CM-SS4B	37	2013-08-19	19.3833	3459785000		Sanidine	4	Iain Mason	Cuba Mesa	129.138.12.160	7.875	H2 Baseline = A @ 8/21/13 9:25 AM @ argonlab; H1 Baseline = A @ 8/21/13 9:25 AM @ argonlab; AX Baseline = A @ 8/21/13 9:25 AM @ argonlab; L1 Baseline = A @ 8/21/13 9:25 AM @ argonlab; L2 Baseline = A @ 8/21/13 9:25 AM @ argonlab; CDD Baseline = A @ 8/21/13 9:25 AM @ argonlab; Ar41 = A @ 8/21/13 9:25 AM @ argonlab; Ar40 = P @ 8/21/13 9:25 AM @ argonlab; Ar39 = P @ 8/21/13 9:25 AM @ argonlab; Ar38 …	Hole 04 (04)	ALLLLLAAAAAA	1	Pychron Script	1	Fusions CO2	4	4	0	4	0	30	30	41			0	-0.0477077
	02	4	12.1763	-0.0042481	0.0909	0.889474	-	99.7738	192.753	0.310166								61744-02	CM-SS4B	37	2013-08-19	13.7667	3459765000		Sanidine	4	Iain Mason	Cuba Mesa	129.138.12.160	7.875	H2 Baseline = A @ 8/21/13 9:24 AM @ argonlab; H1 Baseline = A @ 8/21/13 9:24 AM @ argonlab; AX Baseline = A @ 8/21/13 9:24 AM @ argonlab; L1 Baseline = A @ 8/21/13 9:24 AM @ argonlab; L2 Baseline = A @ 8/21/13 9:24 AM @ argonlab; CDD Baseline = A @ 8/21/13 9:24 AM @ argonlab; Ar41 = A @ 8/21/13 9:24 AM @ argonlab; Ar40 = P @ 8/21/13 9:24 AM @ argonlab; Ar39 = P @ 8/21/13 9:24 AM @ argonlab; Ar38 …	Hole 04 (04)	ALLLLLAAAAAA	1	Pychron Script	1	Fusions CO2	4	4	0	4	0	30	30	8			0	-0.0053976
	25	4	12.2238	-0.0068925	0.0926	1.34773	-	99.7696	193.459	0.232413								61744-25	CM-SS4B	37	2013-08-19	17.7	3459779000		Sanidine	4	Iain Mason	Cuba Mesa	129.138.12.160	7.875	H2 Baseline = A @ 8/21/13 9:25 AM @ argonlab; H1 Baseline = A @ 8/21/13 9:25 AM @ argonlab; AX Baseline = A @ 8/21/13 9:25 AM @ argonlab; L1 Baseline = A @ 8/21/13 9:25 AM @ argonlab; L2 Baseline = A @ 8/21/13 9:25 AM @ argonlab; CDD Baseline = A @ 8/21/13 9:25 AM @ argonlab; Ar41 = A @ 8/21/13 9:25 AM @ argonlab; Ar40 = P @ 8/21/13 9:25 AM @ argonlab; Ar39 = P @ 8/21/13 9:25 AM @ argonlab; Ar38 …	Hole 04 (04)	ALLLLLAAAAAA	1	Pychron Script	1	Fusions CO2	4	4	0	4	0	30	30	31			0	0.0130733
	07	4	12.2941	0.0086051	0.0532	1.36957	59.2909	99.876	194.714	0.230415								61744-07	CM-SS4B	37	2013-08-19	14.5	3459767000		Sanidine	4	Iain Mason	Cuba Mesa	129.138.12.160	7.875	H2 Baseline = A @ 8/21/13 9:24 AM @ argonlab; H1 Baseline = A @ 8/21/13 9:24 AM @ argonlab; AX Baseline = A @ 8/21/13 9:24 AM @ argonlab; L1 Baseline = A @ 8/21/13 9:24 AM @ argonlab; L2 Baseline = A @ 8/21/13 9:24 AM @ argonlab; CDD Baseline = A @ 8/21/13 9:24 AM @ argonlab; Ar41 = A @ 8/21/13 9:24 AM @ argonlab; Ar40 = P @ 8/21/13 9:24 AM @ argonlab; Ar39 = P @ 8/21/13 9:24 AM @ argonlab; Ar38 …	Hole 04 (04)	ALLLLLAAAAAA	1	Pychron Script	1	Fusions CO2	4	4	0	4	0	30	30	13			0	-0.0114976
	60	4	12.327	0.0109916	0.1281	0.565181	46.4176	99.6977	194.877	0.491257								61744-60	CM-SS4B	37	2013-08-19	23.7667	3459801000		Sanidine	4	Iain Mason	Cuba Mesa	129.138.12.160	7.875	H2 Baseline = A @ 8/21/13 9:25 AM @ argonlab; H1 Baseline = A @ 8/21/13 9:25 AM @ argonlab; AX Baseline = A @ 8/21/13 9:25 AM @ argonlab; L1 Baseline = A @ 8/21/13 9:25 AM @ argonlab; L2 Baseline = A @ 8/21/13 9:25 AM @ argonlab; CDD Baseline = A @ 8/21/13 9:25 AM @ argonlab; Ar41 = A @ 8/21/13 9:25 AM @ argonlab; Ar40 = P @ 8/21/13 9:25 AM @ argonlab; Ar39 = P @ 8/21/13 9:25 AM @ argonlab; Ar38 …	Hole 04 (04)	ALLLLLAAAAAA	1	Pychron Script	1	Fusions CO2	4	4	0	4	0	30	30	70			0	-0.0089562
	16	4	12.3023	0.003025	0.0257	1.40962	168.662	99.94	194.954	0.18681								61744-16	CM-SS4B	37	2013-08-19	16.3167	3459774000		Sanidine	4	Iain Mason	Cuba Mesa	129.138.12.160	7.875	H2 Baseline = A @ 8/21/13 9:24 AM @ argonlab; H1 Baseline = A @ 8/21/13 9:24 AM @ argonlab; AX Baseline = A @ 8/21/13 9:24 AM @ argonlab; L1 Baseline = A @ 8/21/13 9:24 AM @ argonlab; L2 Baseline = A @ 8/21/13 9:24 AM @ argonlab; CDD Baseline = A @ 8/21/13 9:24 AM @ argonlab; Ar41 = A @ 8/21/13 9:24 AM @ argonlab; Ar40 = P @ 8/21/13 9:24 AM @ argonlab; Ar39 = P @ 8/21/13 9:24 AM @ argonlab; Ar38 …	Hole 04 (04)	ALLLLLAAAAAA	1	Pychron Script	1	Fusions CO2	4	4	0	4	0	30	30	22			0	0.0182632
	40	4	12.3185	0.0319299	0.0469	0.505928	15.9789	99.9053	195.138	0.566578								61744-40	CM-SS4B	37	2013-08-19	20.35	3459788000		Sanidine	4	Iain Mason	Cuba Mesa	129.138.12.160	7.875	H2 Baseline = A @ 8/21/13 9:25 AM @ argonlab; H1 Baseline = A @ 8/21/13 9:25 AM @ argonlab; AX Baseline = A @ 8/21/13 9:25 AM @ argonlab; L1 Baseline = A @ 8/21/13 9:25 AM @ argonlab; L2 Baseline = A @ 8/21/13 9:25 AM @ argonlab; CDD Baseline = A @ 8/21/13 9:25 AM @ argonlab; Ar41 = A @ 8/21/13 9:25 AM @ argonlab; Ar40 = P @ 8/21/13 9:25 AM @ argonlab; Ar39 = P @ 8/21/13 9:25 AM @ argonlab; Ar38 …	Hole 04 (04)	ALLLLLAAAAAA	1	Pychron Script	1	Fusions CO2	4	4	0	4	0	30	30	46			0	0.0287182
	76	4	12.9367	-0.0002769	-0.00391029	0.497104	-	100.008	204.605	0.676276								61744-76	CM-SS4B	37	2013-08-20	2.85	3459812000		Sanidine	4	Iain Mason	Cuba Mesa	129.138.12.160	7.875	H2 Baseline = A @ 8/21/13 9:25 AM @ argonlab; H1 Baseline = A @ 8/21/13 9:25 AM @ argonlab; AX Baseline = A @ 8/21/13 9:25 AM @ argonlab; L1 Baseline = A @ 8/21/13 9:25 AM @ argonlab; L2 Baseline = A @ 8/21/13 9:25 AM @ argonlab; CDD Baseline = A @ 8/21/13 9:25 AM @ argonlab; Ar41 = A @ 8/21/13 9:25 AM @ argonlab; Ar40 = P @ 8/21/13 9:25 AM @ argonlab; Ar39 = P @ 8/21/13 9:25 AM @ argonlab; Ar38 …	Hole 04 (04)	ALLLLLAAAAAA	1	Pychron Script	1	Fusions CO2	4	4	0	4	0	30	30	86			0	0.0313788
	104	4	13.1834	0.0010592	0.0672	0.945849	481.688	99.8493	207.982	0.372483								61744-104	CM-SS4B	37	2013-08-20	7.71667	3459829000		Sanidine	4	Iain Mason	Cuba Mesa	129.138.12.160	7.875	H2 Baseline = A @ 8/21/13 9:25 AM @ argonlab; H1 Baseline = A @ 8/21/13 9:25 AM @ argonlab; AX Baseline = A @ 8/21/13 9:25 AM @ argonlab; L1 Baseline = A @ 8/21/13 9:25 AM @ argonlab; L2 Baseline = A @ 8/21/13 9:25 AM @ argonlab; CDD Baseline = A @ 8/21/13 9:25 AM @ argonlab; Ar41 = A @ 8/21/13 9:25 AM @ argonlab; Ar40 = P @ 8/21/13 9:25 AM @ argonlab; Ar39 = P @ 8/21/13 9:25 AM @ argonlab; Ar38 …	Hole 04 (04)	ALLLLLAAAAAA	1	Pychron Script	1	Fusions CO2	4	4	0	4	0	30	30	114			0	-0.0325997
	06	4	13.1731	-0.0068734	0.0241	0.847326	-	99.9428	208.011	0.337173								61744-06	CM-SS4B	37	2013-08-19	14.4	3459767000		Sanidine	4	Iain Mason	Cuba Mesa	129.138.12.160	7.875	H2 Baseline = A @ 8/21/13 9:24 AM @ argonlab; H1 Baseline = A @ 8/21/13 9:24 AM @ argonlab; AX Baseline = A @ 8/21/13 9:24 AM @ argonlab; L1 Baseline = A @ 8/21/13 9:24 AM @ argonlab; L2 Baseline = A @ 8/21/13 9:24 AM @ argonlab; CDD Baseline = A @ 8/21/13 9:24 AM @ argonlab; Ar41 = A @ 8/21/13 9:24 AM @ argonlab; Ar40 = P @ 8/21/13 9:24 AM @ argonlab; Ar39 = P @ 8/21/13 9:24 AM @ argonlab; Ar38 …	Hole 04 (04)	ALLLLLAAAAAA	1	Pychron Script	1	Fusions CO2	4	4	0	4	0	30	30	12			0	-0.0141976
	84	4	13.3062	0.0115864	0.2138	0.761195	44.0347	99.5271	209.173	0.379631								61744-84	CM-SS4B	37	2013-08-20	4.33333	3459817000		Sanidine	4	Iain Mason	Cuba Mesa	129.138.12.160	7.875	H2 Baseline = A @ 8/21/13 9:25 AM @ argonlab; H1 Baseline = A @ 8/21/13 9:25 AM @ argonlab; AX Baseline = A @ 8/21/13 9:25 AM @ argonlab; L1 Baseline = A @ 8/21/13 9:25 AM @ argonlab; L2 Baseline = A @ 8/21/13 9:25 AM @ argonlab; CDD Baseline = A @ 8/21/13 9:25 AM @ argonlab; Ar41 = A @ 8/21/13 9:25 AM @ argonlab; Ar40 = P @ 8/21/13 9:25 AM @ argonlab; Ar39 = P @ 8/21/13 9:25 AM @ argonlab; Ar38 …	Hole 04 (04)	ALLLLLAAAAAA	1	Pychron Script	1	Fusions CO2	4	4	0	4	0	30	30	94			0	0.0324655
	12	4	13.3685	-0.0444493	0.2035	0.242349	-	99.525	210.088	1.09871								61744-12	CM-SS4B	37	2013-08-19	15.45	3459771000		Sanidine	4	Iain Mason	Cuba Mesa	129.138.12.160	7.875	H2 Baseline = A @ 8/21/13 9:24 AM @ argonlab; H1 Baseline = A @ 8/21/13 9:24 AM @ argonlab; AX Baseline = A @ 8/21/13 9:24 AM @ argonlab; L1 Baseline = A @ 8/21/13 9:24 AM @ argonlab; L2 Baseline = A @ 8/21/13 9:24 AM @ argonlab; CDD Baseline = A @ 8/21/13 9:24 AM @ argonlab; Ar41 = A @ 8/21/13 9:24 AM @ argonlab; Ar40 = P @ 8/21/13 9:24 AM @ argonlab; Ar39 = P @ 8/21/13 9:24 AM @ argonlab; Ar38 …	Hole 04 (04)	ALLLLLAAAAAA	1	Pychron Script	1	Fusions CO2	4	4	0	4	0	30	30	18			0	0.0102123
	48	4	13.3534	0.0124546	0.0912	0.731868	40.9651	99.8032	210.426	0.404599								61744-48	CM-SS4B	37	2013-08-19	21.8333	3459794000		Sanidine	4	Iain Mason	Cuba Mesa	129.138.12.160	7.875	H2 Baseline = A @ 8/21/13 9:25 AM @ argonlab; H1 Baseline = A @ 8/21/13 9:25 AM @ argonlab; AX Baseline = A @ 8/21/13 9:25 AM @ argonlab; L1 Baseline = A @ 8/21/13 9:25 AM @ argonlab; L2 Baseline = A @ 8/21/13 9:25 AM @ argonlab; CDD Baseline = A @ 8/21/13 9:25 AM @ argonlab; Ar41 = A @ 8/21/13 9:25 AM @ argonlab; Ar40 = P @ 8/21/13 9:25 AM @ argonlab; Ar39 = P @ 8/21/13 9:25 AM @ argonlab; Ar38 …	Hole 04 (04)	ALLLLLAAAAAA	1	Pychron Script	1	Fusions CO2	4	4	0	4	0	30	30	54			0	0.0518625
	32	4	14.2172	-0.0313626	0.323	0.0992058	-	99.3045	222.191	2.82543								61744-32	CM-SS4B	37	2013-08-19	19.0667	3459784000		Sanidine	4	Iain Mason	Cuba Mesa	129.138.12.160	7.875	H2 Baseline = A @ 8/21/13 9:25 AM @ argonlab; H1 Baseline = A @ 8/21/13 9:25 AM @ argonlab; AX Baseline = A @ 8/21/13 9:25 AM @ argonlab; L1 Baseline = A @ 8/21/13 9:25 AM @ argonlab; L2 Baseline = A @ 8/21/13 9:25 AM @ argonlab; CDD Baseline = A @ 8/21/13 9:25 AM @ argonlab; Ar41 = A @ 8/21/13 9:25 AM @ argonlab; Ar40 = P @ 8/21/13 9:25 AM @ argonlab; Ar39 = P @ 8/21/13 9:25 AM @ argonlab; Ar38 …	Hole 04 (04)	ALLLLLAAAAAA	1	Pychron Script	1	Fusions CO2	4	4	0	4	0	30	30	38			0	0.0036923
	22	4	16.7035	-0.0049468	0.5436	0.75217	-	99.0265	257.768	0.478683								61744-22	CM-SS4B	37	2013-08-19	17.15	3459777000		Sanidine	4	Iain Mason	Cuba Mesa	129.138.12.160	7.875	H2 Baseline = A @ 8/21/13 9:25 AM @ argonlab; H1 Baseline = A @ 8/21/13 9:25 AM @ argonlab; AX Baseline = A @ 8/21/13 9:25 AM @ argonlab; L1 Baseline = A @ 8/21/13 9:25 AM @ argonlab; L2 Baseline = A @ 8/21/13 9:25 AM @ argonlab; CDD Baseline = A @ 8/21/13 9:25 AM @ argonlab; Ar41 = A @ 8/21/13 9:25 AM @ argonlab; Ar40 = P @ 8/21/13 9:25 AM @ argonlab; Ar39 = P @ 8/21/13 9:25 AM @ argonlab; Ar38 …	Hole 04 (04)	ALLLLLAAAAAA	1	Pychron Script	1	Fusions CO2	4	4	0	4	0	30	30	28			0	-0.0336368
	29	4	16.6454	0.0245524	0.1019	0.588666	20.7802	99.8281	258.875	0.504972								61744-29	CM-SS4B	37	2013-08-19	18.3167	3459781000		Sanidine	4	Iain Mason	Cuba Mesa	129.138.12.160	7.875	H2 Baseline = A @ 8/21/13 9:25 AM @ argonlab; H1 Baseline = A @ 8/21/13 9:25 AM @ argonlab; AX Baseline = A @ 8/21/13 9:25 AM @ argonlab; L1 Baseline = A @ 8/21/13 9:25 AM @ argonlab; L2 Baseline = A @ 8/21/13 9:25 AM @ argonlab; CDD Baseline = A @ 8/21/13 9:25 AM @ argonlab; Ar41 = A @ 8/21/13 9:25 AM @ argonlab; Ar40 = P @ 8/21/13 9:25 AM @ argonlab; Ar39 = P @ 8/21/13 9:25 AM @ argonlab; Ar38 …	Hole 04 (04)	ALLLLLAAAAAA	1	Pychron Script	1	Fusions CO2	4	4	0	4	0	30	30	35			0	-0.0054267
	98	4	16.7812	0.0282216	0.0656	0.229895	18.0785	99.8958	261.01	1.71523								61744-98	CM-SS4B	37	2013-08-20	6.45	3459825000		Sanidine	4	Iain Mason	Cuba Mesa	129.138.12.160	7.875	H2 Baseline = A @ 8/21/13 9:25 AM @ argonlab; H1 Baseline = A @ 8/21/13 9:25 AM @ argonlab; AX Baseline = A @ 8/21/13 9:25 AM @ argonlab; L1 Baseline = A @ 8/21/13 9:25 AM @ argonlab; L2 Baseline = A @ 8/21/13 9:25 AM @ argonlab; CDD Baseline = A @ 8/21/13 9:25 AM @ argonlab; Ar41 = A @ 8/21/13 9:25 AM @ argonlab; Ar40 = P @ 8/21/13 9:25 AM @ argonlab; Ar39 = P @ 8/21/13 9:25 AM @ argonlab; Ar38 …	Hole 04 (04)	ALLLLLAAAAAA	1	Pychron Script	1	Fusions CO2	4	4	0	4	0	30	30	108			0	0.0354417
	59	4	17.6083	0.0212336	0.1856	0.87261	24.0281	99.6957	272.457	0.43222								61744-59	CM-SS4B	37	2013-08-19	23.4333	3459800000		Sanidine	4	Iain Mason	Cuba Mesa	129.138.12.160	7.875	H2 Baseline = A @ 8/21/13 9:25 AM @ argonlab; H1 Baseline = A @ 8/21/13 9:25 AM @ argonlab; AX Baseline = A @ 8/21/13 9:25 AM @ argonlab; L1 Baseline = A @ 8/21/13 9:25 AM @ argonlab; L2 Baseline = A @ 8/21/13 9:25 AM @ argonlab; CDD Baseline = A @ 8/21/13 9:25 AM @ argonlab; Ar41 = A @ 8/21/13 9:25 AM @ argonlab; Ar40 = P @ 8/21/13 9:25 AM @ argonlab; Ar39 = P @ 8/21/13 9:25 AM @ argonlab; Ar38 …	Hole 04 (04)	ALLLLLAAAAAA	1	Pychron Script	1	Fusions CO2	4	4	0	4	0	30	30	69			0	0.0178
	31	4	18.488	-0.0587575	0.0625	0.281565	-	99.8728	285.52	1.29089								61744-31	CM-SS4B	37	2013-08-19	18.7333	3459783000		Sanidine	4	Iain Mason	Cuba Mesa	129.138.12.160	7.875	H2 Baseline = A @ 8/21/13 9:25 AM @ argonlab; H1 Baseline = A @ 8/21/13 9:25 AM @ argonlab; AX Baseline = A @ 8/21/13 9:25 AM @ argonlab; L1 Baseline = A @ 8/21/13 9:25 AM @ argonlab; L2 Baseline = A @ 8/21/13 9:25 AM @ argonlab; CDD Baseline = A @ 8/21/13 9:25 AM @ argonlab; Ar41 = A @ 8/21/13 9:25 AM @ argonlab; Ar40 = P @ 8/21/13 9:25 AM @ argonlab; Ar39 = P @ 8/21/13 9:25 AM @ argonlab; Ar38 …	Hole 04 (04)	ALLLLLAAAAAA	1	Pychron Script	1	Fusions CO2	4	4	0	4	0	30	30	37			0	0.0336733
	74	4	19.106	-0.0437594	0.0598	0.739692	-	99.8892	294.388	0.507159								61744-74	CM-SS4B	37	2013-08-20	2.41667	3459810000		Sanidine	4	Iain Mason	Cuba Mesa	129.138.12.160	7.875	H2 Baseline = A @ 8/21/13 9:25 AM @ argonlab; H1 Baseline = A @ 8/21/13 9:25 AM @ argonlab; AX Baseline = A @ 8/21/13 9:25 AM @ argonlab; L1 Baseline = A @ 8/21/13 9:25 AM @ argonlab; L2 Baseline = A @ 8/21/13 9:25 AM @ argonlab; CDD Baseline = A @ 8/21/13 9:25 AM @ argonlab; Ar41 = A @ 8/21/13 9:25 AM @ argonlab; Ar40 = P @ 8/21/13 9:25 AM @ argonlab; Ar39 = P @ 8/21/13 9:25 AM @ argonlab; Ar38 …	Hole 04 (04)	ALLLLLAAAAAA	1	Pychron Script	1	Fusions CO2	4	4	0	4	0	30	30	84			0	0.0714951
	102	4	19.3757	0.0123846	0.0514	0.906445	41.1966	99.927	298.337	0.447958								61744-102	CM-SS4B	37	2013-08-20	7.51667	3459829000		Sanidine	4	Iain Mason	Cuba Mesa	129.138.12.160	7.875	H2 Baseline = A @ 8/21/13 9:25 AM @ argonlab; H1 Baseline = A @ 8/21/13 9:25 AM @ argonlab; AX Baseline = A @ 8/21/13 9:25 AM @ argonlab; L1 Baseline = A @ 8/21/13 9:25 AM @ argonlab; L2 Baseline = A @ 8/21/13 9:25 AM @ argonlab; CDD Baseline = A @ 8/21/13 9:25 AM @ argonlab; Ar41 = A @ 8/21/13 9:25 AM @ argonlab; Ar40 = P @ 8/21/13 9:25 AM @ argonlab; Ar39 = P @ 8/21/13 9:25 AM @ argonlab; Ar38 …	Hole 04 (04)	ALLLLLAAAAAA	1	Pychron Script	1	Fusions CO2	4	4	0	4	0	30	30	112			0	0.0019003
	91	4	19.7892	-0.0057149	-0.000645721	1.01338	-	99.9983	304.403	0.408136								61744-91	CM-SS4B	37	2013-08-20	5.06667	3459820000		Sanidine	4	Iain Mason	Cuba Mesa	129.138.12.160	7.875	H2 Baseline = A @ 8/21/13 9:25 AM @ argonlab; H1 Baseline = A @ 8/21/13 9:25 AM @ argonlab; AX Baseline = A @ 8/21/13 9:25 AM @ argonlab; L1 Baseline = A @ 8/21/13 9:25 AM @ argonlab; L2 Baseline = A @ 8/21/13 9:25 AM @ argonlab; CDD Baseline = A @ 8/21/13 9:25 AM @ argonlab; Ar41 = A @ 8/21/13 9:25 AM @ argonlab; Ar40 = P @ 8/21/13 9:25 AM @ argonlab; Ar39 = P @ 8/21/13 9:25 AM @ argonlab; Ar38 …	Hole 04 (04)	ALLLLLAAAAAA	1	Pychron Script	1	Fusions CO2	4	4	0	4	0	30	30	101			0	0.0168655
	53	4	19.8464	-0.0032826	0.0971	1.29527	-	99.8533	304.806	0.331692								61744-53	CM-SS4B	37	2013-08-19	22.5833	3459797000		Sanidine	4	Iain Mason	Cuba Mesa	129.138.12.160	7.875	H2 Baseline = A @ 8/21/13 9:25 AM @ argonlab; H1 Baseline = A @ 8/21/13 9:25 AM @ argonlab; AX Baseline = A @ 8/21/13 9:25 AM @ argonlab; L1 Baseline = A @ 8/21/13 9:25 AM @ argonlab; L2 Baseline = A @ 8/21/13 9:25 AM @ argonlab; CDD Baseline = A @ 8/21/13 9:25 AM @ argonlab; Ar41 = A @ 8/21/13 9:25 AM @ argonlab; Ar40 = P @ 8/21/13 9:25 AM @ argonlab; Ar39 = P @ 8/21/13 9:25 AM @ argonlab; Ar38 …	Hole 04 (04)	ALLLLLAAAAAA	1	Pychron Script	1	Fusions CO2	4	4	0	4	0	30	30	63			0	0.04109
	08	4	21.1916	0.0013856	0.0738	1.15591	368.219	99.897	323.878	0.455718								61744-08	CM-SS4B	37	2013-08-19	15.0333	3459769000		Sanidine	4	Iain Mason	Cuba Mesa	129.138.12.160	7.875	H2 Baseline = A @ 8/21/13 9:24 AM @ argonlab; H1 Baseline = A @ 8/21/13 9:24 AM @ argonlab; AX Baseline = A @ 8/21/13 9:24 AM @ argonlab; L1 Baseline = A @ 8/21/13 9:24 AM @ argonlab; L2 Baseline = A @ 8/21/13 9:24 AM @ argonlab; CDD Baseline = A @ 8/21/13 9:24 AM @ argonlab; Ar41 = A @ 8/21/13 9:24 AM @ argonlab; Ar40 = P @ 8/21/13 9:24 AM @ argonlab; Ar39 = P @ 8/21/13 9:24 AM @ argonlab; Ar38 …	Hole 04 (04)	ALLLLLAAAAAA	1	Pychron Script	1	Fusions CO2	4	4	0	4	0	30	30	14			0	0.0097123
	49	4	21.5026	0.0197909	0.4223	0.290912	25.7797	99.421	326.801	1.30975								61744-49	CM-SS4B	37	2013-08-19	21.9333	3459794000		Sanidine	4	Iain Mason	Cuba Mesa	129.138.12.160	7.875	H2 Baseline = A @ 8/21/13 9:25 AM @ argonlab; H1 Baseline = A @ 8/21/13 9:25 AM @ argonlab; AX Baseline = A @ 8/21/13 9:25 AM @ argonlab; L1 Baseline = A @ 8/21/13 9:25 AM @ argonlab; L2 Baseline = A @ 8/21/13 9:25 AM @ argonlab; CDD Baseline = A @ 8/21/13 9:25 AM @ argonlab; Ar41 = A @ 8/21/13 9:25 AM @ argonlab; Ar40 = P @ 8/21/13 9:25 AM @ argonlab; Ar39 = P @ 8/21/13 9:25 AM @ argonlab; Ar38 …	Hole 04 (04)	ALLLLLAAAAAA	1	Pychron Script	1	Fusions CO2	4	4	0	4	0	30	30	55			0	0.0652625
	73	4	22.1074	0.0237441	0.0862	1.39347	21.4876	99.8923	336.654	0.347738								61744-73	CM-SS4B	37	2013-08-20	2.3	3459810000		Sanidine	4	Iain Mason	Cuba Mesa	129.138.12.160	7.875	H2 Baseline = A @ 8/21/13 9:25 AM @ argonlab; H1 Baseline = A @ 8/21/13 9:25 AM @ argonlab; AX Baseline = A @ 8/21/13 9:25 AM @ argonlab; L1 Baseline = A @ 8/21/13 9:25 AM @ argonlab; L2 Baseline = A @ 8/21/13 9:25 AM @ argonlab; CDD Baseline = A @ 8/21/13 9:25 AM @ argonlab; Ar41 = A @ 8/21/13 9:25 AM @ argonlab; Ar40 = P @ 8/21/13 9:25 AM @ argonlab; Ar39 = P @ 8/21/13 9:25 AM @ argonlab; Ar38 …	Hole 04 (04)	ALLLLLAAAAAA	1	Pychron Script	1	Fusions CO2	4	4	0	4	0	30	30	83			0	-0.0003049
	58	4	24.984	-0.0157364	0.1038	0.505744	-	99.8708	376.168	0.919458								61744-58	CM-SS4B	37	2013-08-19	23.1167	3459798000		Sanidine	4	Iain Mason	Cuba Mesa	129.138.12.160	7.875	H2 Baseline = A @ 8/21/13 9:25 AM @ argonlab; H1 Baseline = A @ 8/21/13 9:25 AM @ argonlab; AX Baseline = A @ 8/21/13 9:25 AM @ argonlab; L1 Baseline = A @ 8/21/13 9:25 AM @ argonlab; L2 Baseline = A @ 8/21/13 9:25 AM @ argonlab; CDD Baseline = A @ 8/21/13 9:25 AM @ argonlab; Ar41 = A @ 8/21/13 9:25 AM @ argonlab; Ar40 = P @ 8/21/13 9:25 AM @ argonlab; Ar39 = P @ 8/21/13 9:25 AM @ argonlab; Ar38 …	Hole 04 (04)	ALLLLLAAAAAA	1	Pychron Script	1	Fusions CO2	4	4	0	4	0	30	30	68			0	-0.0081
	23	4	26.6361	0.0404821	0.0551	0.398874	12.6032	99.9509	398.824	1.49426								61744-23	CM-SS4B	37	2013-08-19	17.25	3459777000		Sanidine	4	Iain Mason	Cuba Mesa	129.138.12.160	7.875	H2 Baseline = A @ 8/21/13 9:25 AM @ argonlab; H1 Baseline = A @ 8/21/13 9:25 AM @ argonlab; AX Baseline = A @ 8/21/13 9:25 AM @ argonlab; L1 Baseline = A @ 8/21/13 9:25 AM @ argonlab; L2 Baseline = A @ 8/21/13 9:25 AM @ argonlab; CDD Baseline = A @ 8/21/13 9:25 AM @ argonlab; Ar41 = A @ 8/21/13 9:25 AM @ argonlab; Ar40 = P @ 8/21/13 9:25 AM @ argonlab; Ar39 = P @ 8/21/13 9:25 AM @ argonlab; Ar38 …	Hole 04 (04)	ALLLLLAAAAAA	1	Pychron Script	1	Fusions CO2	4	4	0	4	0	30	30	29			0	0.0363632
	94	4	27.429	0.0072346	0.0427	1.00142	70.5228	99.9551	409.471	0.501464								61744-94	CM-SS4B	37	2013-08-20	6.01667	3459823000		Sanidine	4	Iain Mason	Cuba Mesa	129.138.12.160	7.875	H2 Baseline = A @ 8/21/13 9:25 AM @ argonlab; H1 Baseline = A @ 8/21/13 9:25 AM @ argonlab; AX Baseline = A @ 8/21/13 9:25 AM @ argonlab; L1 Baseline = A @ 8/21/13 9:25 AM @ argonlab; L2 Baseline = A @ 8/21/13 9:25 AM @ argonlab; CDD Baseline = A @ 8/21/13 9:25 AM @ argonlab; Ar41 = A @ 8/21/13 9:25 AM @ argonlab; Ar40 = P @ 8/21/13 9:25 AM @ argonlab; Ar39 = P @ 8/21/13 9:25 AM @ argonlab; Ar38 …	Hole 04 (04)	ALLLLLAAAAAA	1	Pychron Script	1	Fusions CO2	4	4	0	4	0	30	30	104			0	0.0209417
	13	4	29.047	0.0005561	5.1905	0.490402	917.468	94.6735	410.587	1.02974								61744-13	CM-SS4B	37	2013-08-19	15.5667	3459771000		Sanidine	4	Iain Mason	Cuba Mesa	129.138.12.160	7.875	H2 Baseline = A @ 8/21/13 9:24 AM @ argonlab; H1 Baseline = A @ 8/21/13 9:24 AM @ argonlab; AX Baseline = A @ 8/21/13 9:24 AM @ argonlab; L1 Baseline = A @ 8/21/13 9:24 AM @ argonlab; L2 Baseline = A @ 8/21/13 9:24 AM @ argonlab; CDD Baseline = A @ 8/21/13 9:24 AM @ argonlab; Ar41 = A @ 8/21/13 9:24 AM @ argonlab; Ar40 = P @ 8/21/13 9:24 AM @ argonlab; Ar39 = P @ 8/21/13 9:24 AM @ argonlab; Ar38 …	Hole 04 (04)	ALLLLLAAAAAA	1	Pychron Script	1	Fusions CO2	4	4	0	4	0	30	30	19			0	0.0073123
	70	4	28.1108	7.83e-05	0.1919	0.438803	6516.02	99.7966	417.975	1.24949								61744-70	CM-SS4B	37	2013-08-20	1.66667	3459808000		Sanidine	4	Iain Mason	Cuba Mesa	129.138.12.160	7.875	H2 Baseline = A @ 8/21/13 9:25 AM @ argonlab; H1 Baseline = A @ 8/21/13 9:25 AM @ argonlab; AX Baseline = A @ 8/21/13 9:25 AM @ argonlab; L1 Baseline = A @ 8/21/13 9:25 AM @ argonlab; L2 Baseline = A @ 8/21/13 9:25 AM @ argonlab; CDD Baseline = A @ 8/21/13 9:25 AM @ argonlab; Ar41 = A @ 8/21/13 9:25 AM @ argonlab; Ar40 = P @ 8/21/13 9:25 AM @ argonlab; Ar39 = P @ 8/21/13 9:25 AM @ argonlab; Ar38 …	Hole 04 (04)	ALLLLLAAAAAA	1	Pychron Script	1	Fusions CO2	4	4	0	4	0	30	30	80			0	0.0081251
	37	4	28.3591	-0.0011304	0.0633	0.786848	-	99.9321	421.785	0.749291								61744-37	CM-SS4B	37	2013-08-19	19.8	3459787000		Sanidine	4	Iain Mason	Cuba Mesa	129.138.12.160	7.875	H2 Baseline = A @ 8/21/13 9:25 AM @ argonlab; H1 Baseline = A @ 8/21/13 9:25 AM @ argonlab; AX Baseline = A @ 8/21/13 9:25 AM @ argonlab; L1 Baseline = A @ 8/21/13 9:25 AM @ argonlab; L2 Baseline = A @ 8/21/13 9:25 AM @ argonlab; CDD Baseline = A @ 8/21/13 9:25 AM @ argonlab; Ar41 = A @ 8/21/13 9:25 AM @ argonlab; Ar40 = P @ 8/21/13 9:25 AM @ argonlab; Ar39 = P @ 8/21/13 9:25 AM @ argonlab; Ar38 …	Hole 04 (04)	ALLLLLAAAAAA	1	Pychron Script	1	Fusions CO2	4	4	0	4	0	30	30	43			0	0.0127923
	68	4	30.5248	0.014411	3.8383	0.298068	35.4038	96.2549	435.592	2.11796								61744-68	CM-SS4B	37	2013-08-20	1.25	3459806000		Sanidine	4	Iain Mason	Cuba Mesa	129.138.12.160	7.875	H2 Baseline = A @ 8/21/13 9:25 AM @ argonlab; H1 Baseline = A @ 8/21/13 9:25 AM @ argonlab; AX Baseline = A @ 8/21/13 9:25 AM @ argonlab; L1 Baseline = A @ 8/21/13 9:25 AM @ argonlab; L2 Baseline = A @ 8/21/13 9:25 AM @ argonlab; CDD Baseline = A @ 8/21/13 9:25 AM @ argonlab; Ar41 = A @ 8/21/13 9:25 AM @ argonlab; Ar40 = P @ 8/21/13 9:25 AM @ argonlab; Ar39 = P @ 8/21/13 9:25 AM @ argonlab; Ar38 …	Hole 04 (04)	ALLLLLAAAAAA	1	Pychron Script	1	Fusions CO2	4	4	0	4	0	30	30	78			0	0.0064951
	14	4	29.4663	0.0044642	0.1139	1.00811	114.288	99.8863	436.261	0.622008								61744-14	CM-SS4B	37	2013-08-19	15.6667	3459772000		Sanidine	4	Iain Mason	Cuba Mesa	129.138.12.160	7.875	H2 Baseline = A @ 8/21/13 9:24 AM @ argonlab; H1 Baseline = A @ 8/21/13 9:24 AM @ argonlab; AX Baseline = A @ 8/21/13 9:24 AM @ argonlab; L1 Baseline = A @ 8/21/13 9:24 AM @ argonlab; L2 Baseline = A @ 8/21/13 9:24 AM @ argonlab; CDD Baseline = A @ 8/21/13 9:24 AM @ argonlab; Ar41 = A @ 8/21/13 9:24 AM @ argonlab; Ar40 = P @ 8/21/13 9:24 AM @ argonlab; Ar39 = P @ 8/21/13 9:24 AM @ argonlab; Ar38 …	Hole 04 (04)	ALLLLLAAAAAA	1	Pychron Script	1	Fusions CO2	4	4	0	4	0	30	30	20			0	-0.0298677
	79	4	32.8017	0.0292756	0.1005	0.523162	17.4276	99.9152	479.82	1.30094								61744-79	CM-SS4B	37	2013-08-20	3.16667	3459813000		Sanidine	4	Iain Mason	Cuba Mesa	129.138.12.160	7.875	H2 Baseline = A @ 8/21/13 9:25 AM @ argonlab; H1 Baseline = A @ 8/21/13 9:25 AM @ argonlab; AX Baseline = A @ 8/21/13 9:25 AM @ argonlab; L1 Baseline = A @ 8/21/13 9:25 AM @ argonlab; L2 Baseline = A @ 8/21/13 9:25 AM @ argonlab; CDD Baseline = A @ 8/21/13 9:25 AM @ argonlab; Ar41 = A @ 8/21/13 9:25 AM @ argonlab; Ar40 = P @ 8/21/13 9:25 AM @ argonlab; Ar39 = P @ 8/21/13 9:25 AM @ argonlab; Ar38 …	Hole 04 (04)	ALLLLLAAAAAA	1	Pychron Script	1	Fusions CO2	4	4	0	4	0	30	30	89			0	0.0196788
	20	4	33.3986	-0.0202353	0.2647	0.253003	-	99.7578	486.799	2.47187								61744-20	CM-SS4B	37	2013-08-19	16.95	3459776000		Sanidine	4	Iain Mason	Cuba Mesa	129.138.12.160	7.875	H2 Baseline = A @ 8/21/13 9:24 AM @ argonlab; H1 Baseline = A @ 8/21/13 9:24 AM @ argonlab; AX Baseline = A @ 8/21/13 9:24 AM @ argonlab; L1 Baseline = A @ 8/21/13 9:24 AM @ argonlab; L2 Baseline = A @ 8/21/13 9:24 AM @ argonlab; CDD Baseline = A @ 8/21/13 9:24 AM @ argonlab; Ar41 = A @ 8/21/13 9:24 AM @ argonlab; Ar40 = P @ 8/21/13 9:24 AM @ argonlab; Ar39 = P @ 8/21/13 9:24 AM @ argonlab; Ar38 …	Hole 04 (04)	ALLLLLAAAAAA	1	Pychron Script	1	Fusions CO2	4	4	0	4	0	30	30	26			0	-0.0338368
	67	4	34.9327	0.0047717	0.1045	0.928748	106.923	99.912	507.024	0.699147								61744-67	CM-SS4B	37	2013-08-20	0.916667	3459805000		Sanidine	4	Iain Mason	Cuba Mesa	129.138.12.160	7.875	H2 Baseline = A @ 8/21/13 9:25 AM @ argonlab; H1 Baseline = A @ 8/21/13 9:25 AM @ argonlab; AX Baseline = A @ 8/21/13 9:25 AM @ argonlab; L1 Baseline = A @ 8/21/13 9:25 AM @ argonlab; L2 Baseline = A @ 8/21/13 9:25 AM @ argonlab; CDD Baseline = A @ 8/21/13 9:25 AM @ argonlab; Ar41 = A @ 8/21/13 9:25 AM @ argonlab; Ar40 = P @ 8/21/13 9:25 AM @ argonlab; Ar39 = P @ 8/21/13 9:25 AM @ argonlab; Ar38 …	Hole 04 (04)	ALLLLLAAAAAA	1	Pychron Script	1	Fusions CO2	4	4	0	4	0	30	30	77			0	-0.0142562
	103	4	35.1137	0.0165052	0.0407	0.753454	30.9117	99.9694	509.576	0.747107								61744-103	CM-SS4B	37	2013-08-20	7.61667	3459829000		Sanidine	4	Iain Mason	Cuba Mesa	129.138.12.160	7.875	H2 Baseline = A @ 8/21/13 9:25 AM @ argonlab; H1 Baseline = A @ 8/21/13 9:25 AM @ argonlab; AX Baseline = A @ 8/21/13 9:25 AM @ argonlab; L1 Baseline = A @ 8/21/13 9:25 AM @ argonlab; L2 Baseline = A @ 8/21/13 9:25 AM @ argonlab; CDD Baseline = A @ 8/21/13 9:25 AM @ argonlab; Ar41 = A @ 8/21/13 9:25 AM @ argonlab; Ar40 = P @ 8/21/13 9:25 AM @ argonlab; Ar39 = P @ 8/21/13 9:25 AM @ argonlab; Ar38 …	Hole 04 (04)	ALLLLLAAAAAA	1	Pychron Script	1	Fusions CO2	4	4	0	4	0	30	30	113			0	0.0434003
	100	4	38.5942	0.0199739	0.099	0.969643	25.5435	99.9274	552.951	0.64802								61744-100	CM-SS4B	37	2013-08-20	6.88333	3459826000		Sanidine	4	Iain Mason	Cuba Mesa	129.138.12.160	7.875	H2 Baseline = A @ 8/21/13 9:25 AM @ argonlab; H1 Baseline = A @ 8/21/13 9:25 AM @ argonlab; AX Baseline = A @ 8/21/13 9:25 AM @ argonlab; L1 Baseline = A @ 8/21/13 9:25 AM @ argonlab; L2 Baseline = A @ 8/21/13 9:25 AM @ argonlab; CDD Baseline = A @ 8/21/13 9:25 AM @ argonlab; Ar41 = A @ 8/21/13 9:25 AM @ argonlab; Ar40 = P @ 8/21/13 9:25 AM @ argonlab; Ar39 = P @ 8/21/13 9:25 AM @ argonlab; Ar38 …	Hole 04 (04)	ALLLLLAAAAAA	1	Pychron Script	1	Fusions CO2	4	4	0	4	0	30	30	110			0	0.0152003
	57	4	39.7076	-0.0407068	0.0935	0.388464	-	99.9218	566.624	1.70746								61744-57	CM-SS4B	37	2013-08-19	23	3459798000		Sanidine	4	Iain Mason	Cuba Mesa	129.138.12.160	7.875	H2 Baseline = A @ 8/21/13 9:25 AM @ argonlab; H1 Baseline = A @ 8/21/13 9:25 AM @ argonlab; AX Baseline = A @ 8/21/13 9:25 AM @ argonlab; L1 Baseline = A @ 8/21/13 9:25 AM @ argonlab; L2 Baseline = A @ 8/21/13 9:25 AM @ argonlab; CDD Baseline = A @ 8/21/13 9:25 AM @ argonlab; Ar41 = A @ 8/21/13 9:25 AM @ argonlab; Ar40 = P @ 8/21/13 9:25 AM @ argonlab; Ar39 = P @ 8/21/13 9:25 AM @ argonlab; Ar38 …	Hole 04 (04)	ALLLLLAAAAAA	1	Pychron Script	1	Fusions CO2	4	4	0	4	0	30	30	67			0	0.0212
	55	4	41.1039	-0.0154842	0.1578	1.11407	-	99.8831	583.498	0.767764								61744-55	CM-SS4B	37	2013-08-19	22.8	3459797000		Sanidine	4	Iain Mason	Cuba Mesa	129.138.12.160	7.875	H2 Baseline = A @ 8/21/13 9:25 AM @ argonlab; H1 Baseline = A @ 8/21/13 9:25 AM @ argonlab; AX Baseline = A @ 8/21/13 9:25 AM @ argonlab; L1 Baseline = A @ 8/21/13 9:25 AM @ argonlab; L2 Baseline = A @ 8/21/13 9:25 AM @ argonlab; CDD Baseline = A @ 8/21/13 9:25 AM @ argonlab; Ar41 = A @ 8/21/13 9:25 AM @ argonlab; Ar40 = P @ 8/21/13 9:25 AM @ argonlab; Ar39 = P @ 8/21/13 9:25 AM @ argonlab; Ar38 …	Hole 04 (04)	ALLLLLAAAAAA	1	Pychron Script	1	Fusions CO2	4	4	0	4	0	30	30	65			0	0.0175
	82	4	41.2713	0.0297333	0.0232	0.954391	17.1593	99.9889	586.078	0.821009								61744-82	CM-SS4B	37	2013-08-20	3.9	3459816000		Sanidine	4	Iain Mason	Cuba Mesa	129.138.12.160	7.875	H2 Baseline = A @ 8/21/13 9:25 AM @ argonlab; H1 Baseline = A @ 8/21/13 9:25 AM @ argonlab; AX Baseline = A @ 8/21/13 9:25 AM @ argonlab; L1 Baseline = A @ 8/21/13 9:25 AM @ argonlab; L2 Baseline = A @ 8/21/13 9:25 AM @ argonlab; CDD Baseline = A @ 8/21/13 9:25 AM @ argonlab; Ar41 = A @ 8/21/13 9:25 AM @ argonlab; Ar40 = P @ 8/21/13 9:25 AM @ argonlab; Ar39 = P @ 8/21/13 9:25 AM @ argonlab; Ar38 …	Hole 04 (04)	ALLLLLAAAAAA	1	Pychron Script	1	Fusions CO2	4	4	0	4	0	30	30	92			0	0.0100788
	17	4	45.1698	-0.0327081	0.0539	0.85217	-	99.9585	632.673	0.916641								61744-17	CM-SS4B	37	2013-08-19	16.4167	3459774000		Sanidine	4	Iain Mason	Cuba Mesa	129.138.12.160	7.875	H2 Baseline = A @ 8/21/13 9:24 AM @ argonlab; H1 Baseline = A @ 8/21/13 9:24 AM @ argonlab; AX Baseline = A @ 8/21/13 9:24 AM @ argonlab; L1 Baseline = A @ 8/21/13 9:24 AM @ argonlab; L2 Baseline = A @ 8/21/13 9:24 AM @ argonlab; CDD Baseline = A @ 8/21/13 9:24 AM @ argonlab; Ar41 = A @ 8/21/13 9:24 AM @ argonlab; Ar40 = P @ 8/21/13 9:24 AM @ argonlab; Ar39 = P @ 8/21/13 9:24 AM @ argonlab; Ar38 …	Hole 04 (04)	ALLLLLAAAAAA	1	Pychron Script	1	Fusions CO2	4	4	0	4	0	30	30	23			0	0.0496632
	89	4	46.5943	-0.019444	0.1164	0.870354	-	99.9223	649.274	0.980519								61744-89	CM-SS4B	37	2013-08-20	4.85	3459819000		Sanidine	4	Iain Mason	Cuba Mesa	129.138.12.160	7.875	H2 Baseline = A @ 8/21/13 9:25 AM @ argonlab; H1 Baseline = A @ 8/21/13 9:25 AM @ argonlab; AX Baseline = A @ 8/21/13 9:25 AM @ argonlab; L1 Baseline = A @ 8/21/13 9:25 AM @ argonlab; L2 Baseline = A @ 8/21/13 9:25 AM @ argonlab; CDD Baseline = A @ 8/21/13 9:25 AM @ argonlab; Ar41 = A @ 8/21/13 9:25 AM @ argonlab; Ar40 = P @ 8/21/13 9:25 AM @ argonlab; Ar39 = P @ 8/21/13 9:25 AM @ argonlab; Ar38 …	Hole 04 (04)	ALLLLLAAAAAA	1	Pychron Script	1	Fusions CO2	4	4	0	4	0	30	30	99			0	0.0137655
	50	4	47.7816	0.0218637	2.3434	1.08634	23.3357	98.5418	655.466	0.695812								61744-50	CM-SS4B	37	2013-08-19	22.05	3459795000		Sanidine	4	Iain Mason	Cuba Mesa	129.138.12.160	7.875	H2 Baseline = A @ 8/21/13 9:25 AM @ argonlab; H1 Baseline = A @ 8/21/13 9:25 AM @ argonlab; AX Baseline = A @ 8/21/13 9:25 AM @ argonlab; L1 Baseline = A @ 8/21/13 9:25 AM @ argonlab; L2 Baseline = A @ 8/21/13 9:25 AM @ argonlab; CDD Baseline = A @ 8/21/13 9:25 AM @ argonlab; Ar41 = A @ 8/21/13 9:25 AM @ argonlab; Ar40 = P @ 8/21/13 9:25 AM @ argonlab; Ar39 = P @ 8/21/13 9:25 AM @ argonlab; Ar38 …	Hole 04 (04)	ALLLLLAAAAAA	1	Pychron Script	1	Fusions CO2	4	4	0	4	0	30	30	56			0	0.0700625
	83	4	47.1482	-0.0116034	0.0726	0.899393	-	99.9522	655.929	0.925978								61744-83	CM-SS4B	37	2013-08-20	4	3459816000		Sanidine	4	Iain Mason	Cuba Mesa	129.138.12.160	7.875	H2 Baseline = A @ 8/21/13 9:25 AM @ argonlab; H1 Baseline = A @ 8/21/13 9:25 AM @ argonlab; AX Baseline = A @ 8/21/13 9:25 AM @ argonlab; L1 Baseline = A @ 8/21/13 9:25 AM @ argonlab; L2 Baseline = A @ 8/21/13 9:25 AM @ argonlab; CDD Baseline = A @ 8/21/13 9:25 AM @ argonlab; Ar41 = A @ 8/21/13 9:25 AM @ argonlab; Ar40 = P @ 8/21/13 9:25 AM @ argonlab; Ar39 = P @ 8/21/13 9:25 AM @ argonlab; Ar38 …	Hole 04 (04)	ALLLLLAAAAAA	1	Pychron Script	1	Fusions CO2	4	4	0	4	0	30	30	93			0	0.0645788
	42	4	48.79	0.019531	0.0807	0.634574	26.1228	99.9539	675.05	1.25426								61744-42	CM-SS4B	37	2013-08-19	20.7667	3459790000		Sanidine	4	Iain Mason	Cuba Mesa	129.138.12.160	7.875	H2 Baseline = A @ 8/21/13 9:25 AM @ argonlab; H1 Baseline = A @ 8/21/13 9:25 AM @ argonlab; AX Baseline = A @ 8/21/13 9:25 AM @ argonlab; L1 Baseline = A @ 8/21/13 9:25 AM @ argonlab; L2 Baseline = A @ 8/21/13 9:25 AM @ argonlab; CDD Baseline = A @ 8/21/13 9:25 AM @ argonlab; Ar41 = A @ 8/21/13 9:25 AM @ argonlab; Ar40 = P @ 8/21/13 9:25 AM @ argonlab; Ar39 = P @ 8/21/13 9:25 AM @ argonlab; Ar38 …	Hole 04 (04)	ALLLLLAAAAAA	1	Pychron Script	1	Fusions CO2	4	4	0	4	0	30	30	48			0	0.0356182
	38	4	49.0264	0.0336131	0.1806	0.501795	15.1787	99.8958	677.46	1.59068								61744-38	CM-SS4B	37	2013-08-19	19.9167	3459787000		Sanidine	4	Iain Mason	Cuba Mesa	129.138.12.160	7.875	H2 Baseline = A @ 8/21/13 9:25 AM @ argonlab; H1 Baseline = A @ 8/21/13 9:25 AM @ argonlab; AX Baseline = A @ 8/21/13 9:25 AM @ argonlab; L1 Baseline = A @ 8/21/13 9:25 AM @ argonlab; L2 Baseline = A @ 8/21/13 9:25 AM @ argonlab; CDD Baseline = A @ 8/21/13 9:25 AM @ argonlab; Ar41 = A @ 8/21/13 9:25 AM @ argonlab; Ar40 = P @ 8/21/13 9:25 AM @ argonlab; Ar39 = P @ 8/21/13 9:25 AM @ argonlab; Ar38 …	Hole 04 (04)	ALLLLLAAAAAA	1	Pychron Script	1	Fusions CO2	4	4	0	4	0	30	30	44			0	0.0365923
	65	4	49.1093	0.0293025	0.1167	0.234398	17.4116	99.9339	678.631	3.40804								61744-65	CM-SS4B	37	2013-08-20	0.5	3459803000		Sanidine	4	Iain Mason	Cuba Mesa	129.138.12.160	7.875	H2 Baseline = A @ 8/21/13 9:25 AM @ argonlab; H1 Baseline = A @ 8/21/13 9:25 AM @ argonlab; AX Baseline = A @ 8/21/13 9:25 AM @ argonlab; L1 Baseline = A @ 8/21/13 9:25 AM @ argonlab; L2 Baseline = A @ 8/21/13 9:25 AM @ argonlab; CDD Baseline = A @ 8/21/13 9:25 AM @ argonlab; Ar41 = A @ 8/21/13 9:25 AM @ argonlab; Ar40 = P @ 8/21/13 9:25 AM @ argonlab; Ar39 = P @ 8/21/13 9:25 AM @ argonlab; Ar38 …	Hole 04 (04)	ALLLLLAAAAAA	1	Pychron Script	1	Fusions CO2	4	4	0	4	0	30	30	75			0	-0.0165562
	39	4	49.299	0.0197805	0.0878	0.2439	25.7933	99.9491	680.905	3.16811								61744-39	CM-SS4B	37	2013-08-19	20.0167	3459787000		Sanidine	4	Iain Mason	Cuba Mesa	129.138.12.160	7.875	H2 Baseline = A @ 8/21/13 9:25 AM @ argonlab; H1 Baseline = A @ 8/21/13 9:25 AM @ argonlab; AX Baseline = A @ 8/21/13 9:25 AM @ argonlab; L1 Baseline = A @ 8/21/13 9:25 AM @ argonlab; L2 Baseline = A @ 8/21/13 9:25 AM @ argonlab; CDD Baseline = A @ 8/21/13 9:25 AM @ argonlab; Ar41 = A @ 8/21/13 9:25 AM @ argonlab; Ar40 = P @ 8/21/13 9:25 AM @ argonlab; Ar39 = P @ 8/21/13 9:25 AM @ argonlab; Ar38 …	Hole 04 (04)	ALLLLLAAAAAA	1	Pychron Script	1	Fusions CO2	4	4	0	4	0	30	30	45			0	0.0374923
	54	4	49.6076	-0.0055583	0.0547	1.07351	-	99.9662	684.549	0.83006								61744-54	CM-SS4B	37	2013-08-19	22.7	3459797000		Sanidine	4	Iain Mason	Cuba Mesa	129.138.12.160	7.875	H2 Baseline = A @ 8/21/13 9:25 AM @ argonlab; H1 Baseline = A @ 8/21/13 9:25 AM @ argonlab; AX Baseline = A @ 8/21/13 9:25 AM @ argonlab; L1 Baseline = A @ 8/21/13 9:25 AM @ argonlab; L2 Baseline = A @ 8/21/13 9:25 AM @ argonlab; CDD Baseline = A @ 8/21/13 9:25 AM @ argonlab; Ar41 = A @ 8/21/13 9:25 AM @ argonlab; Ar40 = P @ 8/21/13 9:25 AM @ argonlab; Ar39 = P @ 8/21/13 9:25 AM @ argonlab; Ar38 …	Hole 04 (04)	ALLLLLAAAAAA	1	Pychron Script	1	Fusions CO2	4	4	0	4	0	30	30	64			0	0.0674
	96	4	50.023	-0.0006216	0.4005	0.88819	-	99.7615	688.151	0.944572								61744-96	CM-SS4B	37	2013-08-20	6.23333	3459824000		Sanidine	4	Iain Mason	Cuba Mesa	129.138.12.160	7.875	H2 Baseline = A @ 8/21/13 9:25 AM @ argonlab; H1 Baseline = A @ 8/21/13 9:25 AM @ argonlab; AX Baseline = A @ 8/21/13 9:25 AM @ argonlab; L1 Baseline = A @ 8/21/13 9:25 AM @ argonlab; L2 Baseline = A @ 8/21/13 9:25 AM @ argonlab; CDD Baseline = A @ 8/21/13 9:25 AM @ argonlab; Ar41 = A @ 8/21/13 9:25 AM @ argonlab; Ar40 = P @ 8/21/13 9:25 AM @ argonlab; Ar39 = P @ 8/21/13 9:25 AM @ argonlab; Ar38 …	Hole 04 (04)	ALLLLLAAAAAA	1	Pychron Script	1	Fusions CO2	4	4	0	4	0	30	30	106			0	-0.0043583
	93	4	50.2648	0.0516077	-0.0381	0.323513	9.8862	100.031	692.497	2.42389								61744-93	CM-SS4B	37	2013-08-20	5.91667	3459823000		Sanidine	4	Iain Mason	Cuba Mesa	129.138.12.160	7.875	H2 Baseline = A @ 8/21/13 9:25 AM @ argonlab; H1 Baseline = A @ 8/21/13 9:25 AM @ argonlab; AX Baseline = A @ 8/21/13 9:25 AM @ argonlab; L1 Baseline = A @ 8/21/13 9:25 AM @ argonlab; L2 Baseline = A @ 8/21/13 9:25 AM @ argonlab; CDD Baseline = A @ 8/21/13 9:25 AM @ argonlab; Ar41 = A @ 8/21/13 9:25 AM @ argonlab; Ar40 = P @ 8/21/13 9:25 AM @ argonlab; Ar39 = P @ 8/21/13 9:25 AM @ argonlab; Ar38 …	Hole 04 (04)	ALLLLLAAAAAA	1	Pychron Script	1	Fusions CO2	4	4	0	4	0	30	30	103			0	0.0091417
	61	4	52.3735	0.0710523	0.0942	0.304336	7.18068	99.9567	716.097	2.4523								61744-61	CM-SS4B	37	2013-08-19	23.8667	3459801000		Sanidine	4	Iain Mason	Cuba Mesa	129.138.12.160	7.875	H2 Baseline = A @ 8/21/13 9:25 AM @ argonlab; H1 Baseline = A @ 8/21/13 9:25 AM @ argonlab; AX Baseline = A @ 8/21/13 9:25 AM @ argonlab; L1 Baseline = A @ 8/21/13 9:25 AM @ argonlab; L2 Baseline = A @ 8/21/13 9:25 AM @ argonlab; CDD Baseline = A @ 8/21/13 9:25 AM @ argonlab; Ar41 = A @ 8/21/13 9:25 AM @ argonlab; Ar40 = P @ 8/21/13 9:25 AM @ argonlab; Ar39 = P @ 8/21/13 9:25 AM @ argonlab; Ar38 …	Hole 04 (04)	ALLLLLAAAAAA	1	Pychron Script	1	Fusions CO2	4	4	0	4	0	30	30	71			0	0.0320438
	36	4	54.3087	-0.0001364	0.118	0.250753	-	99.9352	737.709	3.17059								61744-36	CM-SS4B	37	2013-08-19	19.7	3459786000		Sanidine	4	Iain Mason	Cuba Mesa	129.138.12.160	7.875	H2 Baseline = A @ 8/21/13 9:25 AM @ argonlab; H1 Baseline = A @ 8/21/13 9:25 AM @ argonlab; AX Baseline = A @ 8/21/13 9:25 AM @ argonlab; L1 Baseline = A @ 8/21/13 9:25 AM @ argonlab; L2 Baseline = A @ 8/21/13 9:25 AM @ argonlab; CDD Baseline = A @ 8/21/13 9:25 AM @ argonlab; Ar41 = A @ 8/21/13 9:25 AM @ argonlab; Ar40 = P @ 8/21/13 9:25 AM @ argonlab; Ar39 = P @ 8/21/13 9:25 AM @ argonlab; Ar38 …	Hole 04 (04)	ALLLLLAAAAAA	1	Pychron Script	1	Fusions CO2	4	4	0	4	0	30	30	42			0	-0.0080577
	72	4	59.1138	-0.0025406	0.0468	0.730977	-	99.9758	790.923	1.41309								61744-72	CM-SS4B	37	2013-08-20	2.2	3459810000		Sanidine	4	Iain Mason	Cuba Mesa	129.138.12.160	7.875	H2 Baseline = A @ 8/21/13 9:25 AM @ argonlab; H1 Baseline = A @ 8/21/13 9:25 AM @ argonlab; AX Baseline = A @ 8/21/13 9:25 AM @ argonlab; L1 Baseline = A @ 8/21/13 9:25 AM @ argonlab; L2 Baseline = A @ 8/21/13 9:25 AM @ argonlab; CDD Baseline = A @ 8/21/13 9:25 AM @ argonlab; Ar41 = A @ 8/21/13 9:25 AM @ argonlab; Ar40 = P @ 8/21/13 9:25 AM @ argonlab; Ar39 = P @ 8/21/13 9:25 AM @ argonlab; Ar38 …	Hole 04 (04)	ALLLLLAAAAAA	1	Pychron Script	1	Fusions CO2	4	4	0	4	0	30	30	82			0	0.0169951
	63	4	60.1653	-0.0462778	0.3006	0.167691	-	99.8458	801.449	5.83716								61744-63	CM-SS4B	37	2013-08-20	0.283333	3459803000		Sanidine	4	Iain Mason	Cuba Mesa	129.138.12.160	7.875	H2 Baseline = A @ 8/21/13 9:25 AM @ argonlab; H1 Baseline = A @ 8/21/13 9:25 AM @ argonlab; AX Baseline = A @ 8/21/13 9:25 AM @ argonlab; L1 Baseline = A @ 8/21/13 9:25 AM @ argonlab; L2 Baseline = A @ 8/21/13 9:25 AM @ argonlab; CDD Baseline = A @ 8/21/13 9:25 AM @ argonlab; Ar41 = A @ 8/21/13 9:25 AM @ argonlab; Ar40 = P @ 8/21/13 9:25 AM @ argonlab; Ar39 = P @ 8/21/13 9:25 AM @ argonlab; Ar38 …	Hole 04 (04)	ALLLLLAAAAAA	1	Pychron Script	1	Fusions CO2	4	4	0	4	0	30	30	73			0	0.0339438
	88	4	64.4026	0.0016422	0.1171	0.629595	310.683	99.946	847.304	1.46521								61744-88	CM-SS4B	37	2013-08-20	4.75	3459819000		Sanidine	4	Iain Mason	Cuba Mesa	129.138.12.160	7.875	H2 Baseline = A @ 8/21/13 9:25 AM @ argonlab; H1 Baseline = A @ 8/21/13 9:25 AM @ argonlab; AX Baseline = A @ 8/21/13 9:25 AM @ argonlab; L1 Baseline = A @ 8/21/13 9:25 AM @ argonlab; L2 Baseline = A @ 8/21/13 9:25 AM @ argonlab; CDD Baseline = A @ 8/21/13 9:25 AM @ argonlab; Ar41 = A @ 8/21/13 9:25 AM @ argonlab; Ar40 = P @ 8/21/13 9:25 AM @ argonlab; Ar39 = P @ 8/21/13 9:25 AM @ argonlab; Ar38 …	Hole 04 (04)	ALLLLLAAAAAA	1	Pychron Script	1	Fusions CO2	4	4	0	4	0	30	30	98			0	0.0819655
	52	4	64.5951	0.0297377	0.2861	0.33435	17.1568	99.8718	848.839	2.65884								61744-52	CM-SS4B	37	2013-08-19	22.4833	3459796000		Sanidine	4	Iain Mason	Cuba Mesa	129.138.12.160	7.875	H2 Baseline = A @ 8/21/13 9:25 AM @ argonlab; H1 Baseline = A @ 8/21/13 9:25 AM @ argonlab; AX Baseline = A @ 8/21/13 9:25 AM @ argonlab; L1 Baseline = A @ 8/21/13 9:25 AM @ argonlab; L2 Baseline = A @ 8/21/13 9:25 AM @ argonlab; CDD Baseline = A @ 8/21/13 9:25 AM @ argonlab; Ar41 = A @ 8/21/13 9:25 AM @ argonlab; Ar40 = P @ 8/21/13 9:25 AM @ argonlab; Ar39 = P @ 8/21/13 9:25 AM @ argonlab; Ar38 …	Hole 04 (04)	ALLLLLAAAAAA	1	Pychron Script	1	Fusions CO2	4	4	0	4	0	30	30	62			0	-0.0206
	43	4	69.4504	0.0330699	0.1427	0.462814	15.428	99.9422	899.702	1.70434								61744-43	CM-SS4B	37	2013-08-19	20.8667	3459790000		Sanidine	4	Iain Mason	Cuba Mesa	129.138.12.160	7.875	H2 Baseline = A @ 8/21/13 9:25 AM @ argonlab; H1 Baseline = A @ 8/21/13 9:25 AM @ argonlab; AX Baseline = A @ 8/21/13 9:25 AM @ argonlab; L1 Baseline = A @ 8/21/13 9:25 AM @ argonlab; L2 Baseline = A @ 8/21/13 9:25 AM @ argonlab; CDD Baseline = A @ 8/21/13 9:25 AM @ argonlab; Ar41 = A @ 8/21/13 9:25 AM @ argonlab; Ar40 = P @ 8/21/13 9:25 AM @ argonlab; Ar39 = P @ 8/21/13 9:25 AM @ argonlab; Ar38 …	Hole 04 (04)	ALLLLLAAAAAA	1	Pychron Script	1	Fusions CO2	4	4	0	4	0	30	30	49			0	0.0326182
	85	4	71.807	0.0187693	-0.0141	0.341432	27.1829	100.008	924.139	2.36039								61744-85	CM-SS4B	37	2013-08-20	4.43333	3459818000		Sanidine	4	Iain Mason	Cuba Mesa	129.138.12.160	7.875	H2 Baseline = A @ 8/21/13 9:25 AM @ argonlab; H1 Baseline = A @ 8/21/13 9:25 AM @ argonlab; AX Baseline = A @ 8/21/13 9:25 AM @ argonlab; L1 Baseline = A @ 8/21/13 9:25 AM @ argonlab; L2 Baseline = A @ 8/21/13 9:25 AM @ argonlab; CDD Baseline = A @ 8/21/13 9:25 AM @ argonlab; Ar41 = A @ 8/21/13 9:25 AM @ argonlab; Ar40 = P @ 8/21/13 9:25 AM @ argonlab; Ar39 = P @ 8/21/13 9:25 AM @ argonlab; Ar38 …	Hole 04 (04)	ALLLLLAAAAAA	1	Pychron Script	1	Fusions CO2	4	4	0	4	0	30	30	95			0	0.0286655
	30	4	72.8352	-0.014349	0.0441	0.681226	-	99.9802	934.278	1.40575								61744-30	CM-SS4B	37	2013-08-19	18.6333	3459782000		Sanidine	4	Iain Mason	Cuba Mesa	129.138.12.160	7.875	H2 Baseline = A @ 8/21/13 9:25 AM @ argonlab; H1 Baseline = A @ 8/21/13 9:25 AM @ argonlab; AX Baseline = A @ 8/21/13 9:25 AM @ argonlab; L1 Baseline = A @ 8/21/13 9:25 AM @ argonlab; L2 Baseline = A @ 8/21/13 9:25 AM @ argonlab; CDD Baseline = A @ 8/21/13 9:25 AM @ argonlab; Ar41 = A @ 8/21/13 9:25 AM @ argonlab; Ar40 = P @ 8/21/13 9:25 AM @ argonlab; Ar39 = P @ 8/21/13 9:25 AM @ argonlab; Ar38 …	Hole 04 (04)	ALLLLLAAAAAA	1	Pychron Script	1	Fusions CO2	4	4	0	4	0	30	30	36			0	0.0026733
	101	4	75.8492	0.0315799	0.0952	0.568512	16.156	99.9658	964.228	2.05472								61744-101	CM-SS4B	37	2013-08-20	6.98333	3459827000		Sanidine	4	Iain Mason	Cuba Mesa	129.138.12.160	7.875	H2 Baseline = A @ 8/21/13 9:25 AM @ argonlab; H1 Baseline = A @ 8/21/13 9:25 AM @ argonlab; AX Baseline = A @ 8/21/13 9:25 AM @ argonlab; L1 Baseline = A @ 8/21/13 9:25 AM @ argonlab; L2 Baseline = A @ 8/21/13 9:25 AM @ argonlab; CDD Baseline = A @ 8/21/13 9:25 AM @ argonlab; Ar41 = A @ 8/21/13 9:25 AM @ argonlab; Ar40 = P @ 8/21/13 9:25 AM @ argonlab; Ar39 = P @ 8/21/13 9:25 AM @ argonlab; Ar38 …	Hole 04 (04)	ALLLLLAAAAAA	1	Pychron Script	1	Fusions CO2	4	4	0	4	0	30	30	111			0	0.0503003
	47	4	78.3922	-0.0230182	0.1599	0.48222	-	99.9366	988.939	2.23042								61744-47	CM-SS4B	37	2013-08-19	21.5	3459793000		Sanidine	4	Iain Mason	Cuba Mesa	129.138.12.160	7.875	H2 Baseline = A @ 8/21/13 9:25 AM @ argonlab; H1 Baseline = A @ 8/21/13 9:25 AM @ argonlab; AX Baseline = A @ 8/21/13 9:25 AM @ argonlab; L1 Baseline = A @ 8/21/13 9:25 AM @ argonlab; L2 Baseline = A @ 8/21/13 9:25 AM @ argonlab; CDD Baseline = A @ 8/21/13 9:25 AM @ argonlab; Ar41 = A @ 8/21/13 9:25 AM @ argonlab; Ar40 = P @ 8/21/13 9:25 AM @ argonlab; Ar39 = P @ 8/21/13 9:25 AM @ argonlab; Ar38 …	Hole 04 (04)	ALLLLLAAAAAA	1	Pychron Script	1	Fusions CO2	4	4	0	4	0	30	30	53			0	0.0419182
	21	4	80.1213	-0.0121889	0.1531	1.03894	-	99.9421	1005.76	1.08647								61744-21	CM-SS4B	37	2013-08-19	17.05	3459777000		Sanidine	4	Iain Mason	Cuba Mesa	129.138.12.160	7.875	H2 Baseline = A @ 8/21/13 9:25 AM @ argonlab; H1 Baseline = A @ 8/21/13 9:25 AM @ argonlab; AX Baseline = A @ 8/21/13 9:25 AM @ argonlab; L1 Baseline = A @ 8/21/13 9:25 AM @ argonlab; L2 Baseline = A @ 8/21/13 9:25 AM @ argonlab; CDD Baseline = A @ 8/21/13 9:25 AM @ argonlab; Ar41 = A @ 8/21/13 9:25 AM @ argonlab; Ar40 = P @ 8/21/13 9:25 AM @ argonlab; Ar39 = P @ 8/21/13 9:25 AM @ argonlab; Ar38 …	Hole 04 (04)	ALLLLLAAAAAA	1	Pychron Script	1	Fusions CO2	4	4	0	4	0	30	30	27			0	0.0502632
	56	4	83.7964	0.0057327	0.0474	2.07605	88.9989	99.9837	1041.26	0.844485								61744-56	CM-SS4B	37	2013-08-19	22.9	3459798000		Sanidine	4	Iain Mason	Cuba Mesa	129.138.12.160	7.875	H2 Baseline = A @ 8/21/13 9:25 AM @ argonlab; H1 Baseline = A @ 8/21/13 9:25 AM @ argonlab; AX Baseline = A @ 8/21/13 9:25 AM @ argonlab; L1 Baseline = A @ 8/21/13 9:25 AM @ argonlab; L2 Baseline = A @ 8/21/13 9:25 AM @ argonlab; CDD Baseline = A @ 8/21/13 9:25 AM @ argonlab; Ar41 = A @ 8/21/13 9:25 AM @ argonlab; Ar40 = P @ 8/21/13 9:25 AM @ argonlab; Ar39 = P @ 8/21/13 9:25 AM @ argonlab; Ar38 …	Hole 04 (04)	ALLLLLAAAAAA	1	Pychron Script	1	Fusions CO2	4	4	0	4	0	30	30	66			0	0.0703
	15	4	84.4919	0.0139707	2.2112	1.24715	36.5196	99.2216	1041.75	0.994383								61744-15	CM-SS4B	37	2013-08-19	15.7667	3459772000		Sanidine	4	Iain Mason	Cuba Mesa	129.138.12.160	7.875	H2 Baseline = A @ 8/21/13 9:24 AM @ argonlab; H1 Baseline = A @ 8/21/13 9:24 AM @ argonlab; AX Baseline = A @ 8/21/13 9:24 AM @ argonlab; L1 Baseline = A @ 8/21/13 9:24 AM @ argonlab; L2 Baseline = A @ 8/21/13 9:24 AM @ argonlab; CDD Baseline = A @ 8/21/13 9:24 AM @ argonlab; Ar41 = A @ 8/21/13 9:24 AM @ argonlab; Ar40 = P @ 8/21/13 9:24 AM @ argonlab; Ar39 = P @ 8/21/13 9:24 AM @ argonlab; Ar38 …	Hole 04 (04)	ALLLLLAAAAAA	1	Pychron Script	1	Fusions CO2	4	4	0	4	0	30	30	21			0	0.0444123
	28	4	84.1679	0.035102	0.0833	0.674504	14.5349	99.9738	1044.72	1.54375								61744-28	CM-SS4B	37	2013-08-19	18.2167	3459781000		Sanidine	4	Iain Mason	Cuba Mesa	129.138.12.160	7.875	H2 Baseline = A @ 8/21/13 9:25 AM @ argonlab; H1 Baseline = A @ 8/21/13 9:25 AM @ argonlab; AX Baseline = A @ 8/21/13 9:25 AM @ argonlab; L1 Baseline = A @ 8/21/13 9:25 AM @ argonlab; L2 Baseline = A @ 8/21/13 9:25 AM @ argonlab; CDD Baseline = A @ 8/21/13 9:25 AM @ argonlab; Ar41 = A @ 8/21/13 9:25 AM @ argonlab; Ar40 = P @ 8/21/13 9:25 AM @ argonlab; Ar39 = P @ 8/21/13 9:25 AM @ argonlab; Ar38 …	Hole 04 (04)	ALLLLLAAAAAA	1	Pychron Script	1	Fusions CO2	4	4	0	4	0	30	30	34			0	0.0127733
	81	4	88.406	0.0105434	0.0623	0.764138	48.3908	99.9801	1084.41	1.4542								61744-81	CM-SS4B	37	2013-08-20	3.58333	3459815000		Sanidine	4	Iain Mason	Cuba Mesa	129.138.12.160	7.875	H2 Baseline = A @ 8/21/13 9:25 AM @ argonlab; H1 Baseline = A @ 8/21/13 9:25 AM @ argonlab; AX Baseline = A @ 8/21/13 9:25 AM @ argonlab; L1 Baseline = A @ 8/21/13 9:25 AM @ argonlab; L2 Baseline = A @ 8/21/13 9:25 AM @ argonlab; CDD Baseline = A @ 8/21/13 9:25 AM @ argonlab; Ar41 = A @ 8/21/13 9:25 AM @ argonlab; Ar40 = P @ 8/21/13 9:25 AM @ argonlab; Ar39 = P @ 8/21/13 9:25 AM @ argonlab; Ar38 …	Hole 04 (04)	ALLLLLAAAAAA	1	Pychron Script	1	Fusions CO2	4	4	0	4	0	30	30	91			0	0.0595788
	34	4	90.4604	0.0104671	0.0416	1.02256	48.7436	99.9872	1103.39	1.01986								61744-34	CM-SS4B	37	2013-08-19	19.2833	3459785000		Sanidine	4	Iain Mason	Cuba Mesa	129.138.12.160	7.875	H2 Baseline = A @ 8/21/13 9:25 AM @ argonlab; H1 Baseline = A @ 8/21/13 9:25 AM @ argonlab; AX Baseline = A @ 8/21/13 9:25 AM @ argonlab; L1 Baseline = A @ 8/21/13 9:25 AM @ argonlab; L2 Baseline = A @ 8/21/13 9:25 AM @ argonlab; CDD Baseline = A @ 8/21/13 9:25 AM @ argonlab; Ar41 = A @ 8/21/13 9:25 AM @ argonlab; Ar40 = P @ 8/21/13 9:25 AM @ argonlab; Ar39 = P @ 8/21/13 9:25 AM @ argonlab; Ar38 …	Hole 04 (04)	ALLLLLAAAAAA	1	Pychron Script	1	Fusions CO2	4	4	0	4	0	30	30	40			0	0.0117923
	90	4	91.4807	0.0560589	-0.0058593	0.715074	9.10121	100.007	1112.89	1.75924								61744-90	CM-SS4B	37	2013-08-20	4.95	3459819000		Sanidine	4	Iain Mason	Cuba Mesa	129.138.12.160	7.875	H2 Baseline = A @ 8/21/13 9:25 AM @ argonlab; H1 Baseline = A @ 8/21/13 9:25 AM @ argonlab; AX Baseline = A @ 8/21/13 9:25 AM @ argonlab; L1 Baseline = A @ 8/21/13 9:25 AM @ argonlab; L2 Baseline = A @ 8/21/13 9:25 AM @ argonlab; CDD Baseline = A @ 8/21/13 9:25 AM @ argonlab; Ar41 = A @ 8/21/13 9:25 AM @ argonlab; Ar40 = P @ 8/21/13 9:25 AM @ argonlab; Ar39 = P @ 8/21/13 9:25 AM @ argonlab; Ar38 …	Hole 04 (04)	ALLLLLAAAAAA	1	Pychron Script	1	Fusions CO2	4	4	0	4	0	30	30	100			0	0.0923655
	27	4	92.6604	-0.0057419	0.1173	0.880574	-	99.9617	1123.21	1.10502								61744-27	CM-SS4B	37	2013-08-19	18.1167	3459780000		Sanidine	4	Iain Mason	Cuba Mesa	129.138.12.160	7.875	H2 Baseline = A @ 8/21/13 9:25 AM @ argonlab; H1 Baseline = A @ 8/21/13 9:25 AM @ argonlab; AX Baseline = A @ 8/21/13 9:25 AM @ argonlab; L1 Baseline = A @ 8/21/13 9:25 AM @ argonlab; L2 Baseline = A @ 8/21/13 9:25 AM @ argonlab; CDD Baseline = A @ 8/21/13 9:25 AM @ argonlab; Ar41 = A @ 8/21/13 9:25 AM @ argonlab; Ar40 = P @ 8/21/13 9:25 AM @ argonlab; Ar39 = P @ 8/21/13 9:25 AM @ argonlab; Ar38 …	Hole 04 (04)	ALLLLLAAAAAA	1	Pychron Script	1	Fusions CO2	4	4	0	4	0	30	30	33			0	0.0707733
	77	4	99.7983	-0.0228618	0.1227	0.513293	-	99.9617	1186.75	2.22496								61744-77	CM-SS4B	37	2013-08-20	2.95	3459812000		Sanidine	4	Iain Mason	Cuba Mesa	129.138.12.160	7.875	H2 Baseline = A @ 8/21/13 9:25 AM @ argonlab; H1 Baseline = A @ 8/21/13 9:25 AM @ argonlab; AX Baseline = A @ 8/21/13 9:25 AM @ argonlab; L1 Baseline = A @ 8/21/13 9:25 AM @ argonlab; L2 Baseline = A @ 8/21/13 9:25 AM @ argonlab; CDD Baseline = A @ 8/21/13 9:25 AM @ argonlab; Ar41 = A @ 8/21/13 9:25 AM @ argonlab; Ar40 = P @ 8/21/13 9:25 AM @ argonlab; Ar39 = P @ 8/21/13 9:25 AM @ argonlab; Ar38 …	Hole 04 (04)	ALLLLLAAAAAA	1	Pychron Script	1	Fusions CO2	4	4	0	4	0	30	30	87			0	0.0620788
	97	4	113.914	-0.0015884	0.1664	0.868987	-	99.9561	1306.26	1.78149								61744-97	CM-SS4B	37	2013-08-20	6.33333	3459824000		Sanidine	4	Iain Mason	Cuba Mesa	129.138.12.160	7.875	H2 Baseline = A @ 8/21/13 9:25 AM @ argonlab; H1 Baseline = A @ 8/21/13 9:25 AM @ argonlab; AX Baseline = A @ 8/21/13 9:25 AM @ argonlab; L1 Baseline = A @ 8/21/13 9:25 AM @ argonlab; L2 Baseline = A @ 8/21/13 9:25 AM @ argonlab; CDD Baseline = A @ 8/21/13 9:25 AM @ argonlab; Ar41 = A @ 8/21/13 9:25 AM @ argonlab; Ar40 = P @ 8/21/13 9:25 AM @ argonlab; Ar39 = P @ 8/21/13 9:25 AM @ argonlab; Ar38 …	Hole 04 (04)	ALLLLLAAAAAA	1	Pychron Script	1	Fusions CO2	4	4	0	4	0	30	30	107			0	0.0431417
	33	4	123.824	0.0069367	0.0365	0.823184	73.5514	99.9917	1386.1	1.77937								61744-33	CM-SS4B	37	2013-08-19	19.1833	3459784000		Sanidine	4	Iain Mason	Cuba Mesa	129.138.12.160	7.875	H2 Baseline = A @ 8/21/13 9:25 AM @ argonlab; H1 Baseline = A @ 8/21/13 9:25 AM @ argonlab; AX Baseline = A @ 8/21/13 9:25 AM @ argonlab; L1 Baseline = A @ 8/21/13 9:25 AM @ argonlab; L2 Baseline = A @ 8/21/13 9:25 AM @ argonlab; CDD Baseline = A @ 8/21/13 9:25 AM @ argonlab; Ar41 = A @ 8/21/13 9:25 AM @ argonlab; Ar40 = P @ 8/21/13 9:25 AM @ argonlab; Ar39 = P @ 8/21/13 9:25 AM @ argonlab; Ar38 …	Hole 04 (04)	ALLLLLAAAAAA	1	Pychron Script	1	Fusions CO2	4	4	0	4	0	30	30	39			0	0.0155923
	64	4	139.614	-0.0199878	0.0252	0.810925	-	99.9935	1506.04	1.97044								61744-64	CM-SS4B	37	2013-08-20	0.383333	3459803000		Sanidine	4	Iain Mason	Cuba Mesa	129.138.12.160	7.875	H2 Baseline = A @ 8/21/13 9:25 AM @ argonlab; H1 Baseline = A @ 8/21/13 9:25 AM @ argonlab; AX Baseline = A @ 8/21/13 9:25 AM @ argonlab; L1 Baseline = A @ 8/21/13 9:25 AM @ argonlab; L2 Baseline = A @ 8/21/13 9:25 AM @ argonlab; CDD Baseline = A @ 8/21/13 9:25 AM @ argonlab; Ar41 = A @ 8/21/13 9:25 AM @ argonlab; Ar40 = P @ 8/21/13 9:25 AM @ argonlab; Ar39 = P @ 8/21/13 9:25 AM @ argonlab; Ar38 …	Hole 04 (04)	ALLLLLAAAAAA	1	Pychron Script	1	Fusions CO2	4	4	0	4	0	30	30	74			0	0.0420438
	CM-SS4, Sanidine, J=0.0091373±0.01%, IC=1.055411±0.0001298, NM-258E, Lab#=61748, Argus VI
	33	4	4.3739	0.0246727	0.0595	0.38261	20.6789	99.6409	71.3606	0.316859								61748-33	CM-SS4B	37	2013-08-20	13.3	3459849000		Sanidine	29	Iain Mason	Cuba Mesa	129.138.12.160	7.875	H2 Baseline = A @ 8/21/13 9:26 AM @ argonlab; H1 Baseline = A @ 8/21/13 9:26 AM @ argonlab; AX Baseline = A @ 8/21/13 9:26 AM @ argonlab; L1 Baseline = A @ 8/21/13 9:26 AM @ argonlab; L2 Baseline = A @ 8/21/13 9:26 AM @ argonlab; CDD Baseline = A @ 8/21/13 9:26 AM @ argonlab; Ar41 = A @ 8/21/13 9:26 AM @ argonlab; Ar40 = P @ 8/21/13 9:26 AM @ argonlab; Ar39 = P @ 8/21/13 9:26 AM @ argonlab; Ar38 …	Hole 29 (103)	ALLLLLAAAAAA	1	Pychron Script	1	Fusions CO2	4	4	0	4	0	30	30	147			0	-0.0244174
	32	4	4.53671	-0.0223272	0.0262	0.488061	-	99.7912	74.0756	0.243441								61748-32	CM-SS4B	37	2013-08-20	13.1833	3459849000		Sanidine	29	Iain Mason	Cuba Mesa	129.138.12.160	7.875	H2 Baseline = A @ 8/21/13 9:26 AM @ argonlab; H1 Baseline = A @ 8/21/13 9:26 AM @ argonlab; AX Baseline = A @ 8/21/13 9:26 AM @ argonlab; L1 Baseline = A @ 8/21/13 9:26 AM @ argonlab; L2 Baseline = A @ 8/21/13 9:26 AM @ argonlab; CDD Baseline = A @ 8/21/13 9:26 AM @ argonlab; Ar41 = A @ 8/21/13 9:26 AM @ argonlab; Ar40 = P @ 8/21/13 9:26 AM @ argonlab; Ar39 = P @ 8/21/13 9:26 AM @ argonlab; Ar38 …	Hole 29 (103)	ALLLLLAAAAAA	1	Pychron Script	1	Fusions CO2	4	4	0	4	0	30	30	146			0	-0.0108174
	100	4	4.52629	0.221292	-0.0316	0.119076	2.30557	100.616	74.5189	0.984432								61748-100	CM-SS4B	37	2013-08-21	1.11667	3459892000		Sanidine	29	Iain Mason	Cuba Mesa	129.138.12.160	7.875	H2 Baseline = A @ 8/21/13 9:26 AM @ argonlab; H1 Baseline = A @ 8/21/13 9:26 AM @ argonlab; AX Baseline = A @ 8/21/13 9:26 AM @ argonlab; L1 Baseline = A @ 8/21/13 9:26 AM @ argonlab; L2 Baseline = A @ 8/21/13 9:26 AM @ argonlab; CDD Baseline = A @ 8/21/13 9:26 AM @ argonlab; Ar41 = A @ 8/21/13 9:26 AM @ argonlab; Ar40 = P @ 8/21/13 9:26 AM @ argonlab; Ar39 = P @ 8/21/13 9:26 AM @ argonlab; Ar38 …	Hole 29 (103)	ALLLLLAAAAAA	1	Pychron Script	1	Fusions CO2	4	4	0	4	0	30	30	214			0	0.0094834
	47	4	4.60607	0.0260262	-0.000301707	0.769577	19.6035	100.04	75.3733	0.168386								61748-47	CM-SS4B	37	2013-08-20	15.6333	3459858000		Sanidine	29	Iain Mason	Cuba Mesa	129.138.12.160	7.875	H2 Baseline = A @ 8/21/13 9:26 AM @ argonlab; H1 Baseline = A @ 8/21/13 9:26 AM @ argonlab; AX Baseline = A @ 8/21/13 9:26 AM @ argonlab; L1 Baseline = A @ 8/21/13 9:26 AM @ argonlab; L2 Baseline = A @ 8/21/13 9:26 AM @ argonlab; CDD Baseline = A @ 8/21/13 9:26 AM @ argonlab; Ar41 = A @ 8/21/13 9:26 AM @ argonlab; Ar40 = P @ 8/21/13 9:26 AM @ argonlab; Ar39 = P @ 8/21/13 9:26 AM @ argonlab; Ar38 …	Hole 29 (103)	ALLLLLAAAAAA	1	Pychron Script	1	Fusions CO2	4	4	0	4	0	30	30	161			0	-0.258219
	54	4	4.70292	0.0582116	0.034	0.331313	8.76464	99.8771	76.8064	0.358643								61748-54	CM-SS4B	37	2013-08-20	17.05	3459863000		Sanidine	29	Iain Mason	Cuba Mesa	129.138.12.160	7.875	H2 Baseline = A @ 8/21/13 9:26 AM @ argonlab; H1 Baseline = A @ 8/21/13 9:26 AM @ argonlab; AX Baseline = A @ 8/21/13 9:26 AM @ argonlab; L1 Baseline = A @ 8/21/13 9:26 AM @ argonlab; L2 Baseline = A @ 8/21/13 9:26 AM @ argonlab; CDD Baseline = A @ 8/21/13 9:26 AM @ argonlab; Ar41 = A @ 8/21/13 9:26 AM @ argonlab; Ar40 = P @ 8/21/13 9:26 AM @ argonlab; Ar39 = P @ 8/21/13 9:26 AM @ argonlab; Ar38 …	Hole 29 (103)	ALLLLLAAAAAA	1	Pychron Script	1	Fusions CO2	4	4	0	4	0	30	30	168			0	-0.0044416
	20	4	4.81904	0.0070993	0.0323	0.858991	71.8668	99.8127	78.6135	0.148555								61748-20	CM-SS4B	37	2013-08-20	11.2833	3459842000		Sanidine	29	Iain Mason	Cuba Mesa	129.138.12.160	7.875	H2 Baseline = A @ 8/21/13 9:26 AM @ argonlab; H1 Baseline = A @ 8/21/13 9:26 AM @ argonlab; AX Baseline = A @ 8/21/13 9:26 AM @ argonlab; L1 Baseline = A @ 8/21/13 9:26 AM @ argonlab; L2 Baseline = A @ 8/21/13 9:26 AM @ argonlab; CDD Baseline = A @ 8/21/13 9:26 AM @ argonlab; Ar41 = A @ 8/21/13 9:26 AM @ argonlab; Ar40 = P @ 8/21/13 9:26 AM @ argonlab; Ar39 = P @ 8/21/13 9:26 AM @ argonlab; Ar38 …	Hole 29 (103)	ALLLLLAAAAAA	1	Pychron Script	1	Fusions CO2	4	4	0	4	0	30	30	134			0	-0.0508667
	60	4	5.21067	0.0137325	0.0669	0.395827	37.153	99.6262	84.7114	0.328232								61748-60	CM-SS4B	37	2013-08-20	18.1167	3459867000		Sanidine	29	Iain Mason	Cuba Mesa	129.138.12.160	7.875	H2 Baseline = A @ 8/21/13 9:26 AM @ argonlab; H1 Baseline = A @ 8/21/13 9:26 AM @ argonlab; AX Baseline = A @ 8/21/13 9:26 AM @ argonlab; L1 Baseline = A @ 8/21/13 9:26 AM @ argonlab; L2 Baseline = A @ 8/21/13 9:26 AM @ argonlab; CDD Baseline = A @ 8/21/13 9:26 AM @ argonlab; Ar41 = A @ 8/21/13 9:26 AM @ argonlab; Ar40 = P @ 8/21/13 9:26 AM @ argonlab; Ar39 = P @ 8/21/13 9:26 AM @ argonlab; Ar38 …	Hole 29 (103)	ALLLLLAAAAAA	1	Pychron Script	1	Fusions CO2	4	4	0	4	0	30	30	174			0	-0.0062415
	45	4	5.55463	0.0122981	0.0666	0.819838	41.4864	99.6542	90.2002	0.17255								61748-45	CM-SS4B	37	2013-08-20	15.4333	3459857000		Sanidine	29	Iain Mason	Cuba Mesa	129.138.12.160	7.875	H2 Baseline = A @ 8/21/13 9:26 AM @ argonlab; H1 Baseline = A @ 8/21/13 9:26 AM @ argonlab; AX Baseline = A @ 8/21/13 9:26 AM @ argonlab; L1 Baseline = A @ 8/21/13 9:26 AM @ argonlab; L2 Baseline = A @ 8/21/13 9:26 AM @ argonlab; CDD Baseline = A @ 8/21/13 9:26 AM @ argonlab; Ar41 = A @ 8/21/13 9:26 AM @ argonlab; Ar40 = P @ 8/21/13 9:26 AM @ argonlab; Ar39 = P @ 8/21/13 9:26 AM @ argonlab; Ar38 …	Hole 29 (103)	ALLLLLAAAAAA	1	Pychron Script	1	Fusions CO2	4	4	0	4	0	30	30	159			0	-0.0090194
	74	4	5.56762	0.0138969	0.0246	0.48727	36.7135	99.8865	90.612	0.313752								61748-74	CM-SS4B	37	2013-08-20	20.2333	3459874000		Sanidine	29	Iain Mason	Cuba Mesa	129.138.12.160	7.875	H2 Baseline = A @ 8/21/13 9:26 AM @ argonlab; H1 Baseline = A @ 8/21/13 9:26 AM @ argonlab; AX Baseline = A @ 8/21/13 9:26 AM @ argonlab; L1 Baseline = A @ 8/21/13 9:26 AM @ argonlab; L2 Baseline = A @ 8/21/13 9:26 AM @ argonlab; CDD Baseline = A @ 8/21/13 9:26 AM @ argonlab; Ar41 = A @ 8/21/13 9:26 AM @ argonlab; Ar40 = P @ 8/21/13 9:26 AM @ argonlab; Ar39 = P @ 8/21/13 9:26 AM @ argonlab; Ar38 …	Hole 29 (103)	ALLLLLAAAAAA	1	Pychron Script	1	Fusions CO2	4	4	0	4	0	30	30	188			0	-0.004461
	73	4	5.69251	0.126778	0.315	0.190217	4.02438	98.529	91.3758	0.697655								61748-73	CM-SS4B	37	2013-08-20	20.1167	3459874000		Sanidine	29	Iain Mason	Cuba Mesa	129.138.12.160	7.875	H2 Baseline = A @ 8/21/13 9:26 AM @ argonlab; H1 Baseline = A @ 8/21/13 9:26 AM @ argonlab; AX Baseline = A @ 8/21/13 9:26 AM @ argonlab; L1 Baseline = A @ 8/21/13 9:26 AM @ argonlab; L2 Baseline = A @ 8/21/13 9:26 AM @ argonlab; CDD Baseline = A @ 8/21/13 9:26 AM @ argonlab; Ar41 = A @ 8/21/13 9:26 AM @ argonlab; Ar40 = P @ 8/21/13 9:26 AM @ argonlab; Ar39 = P @ 8/21/13 9:26 AM @ argonlab; Ar38 …	Hole 29 (103)	ALLLLLAAAAAA	1	Pychron Script	1	Fusions CO2	4	4	0	4	0	30	30	187			0	-0.029961
	79	4	5.93091	0.0546836	0.0189	0.283673	9.33011	99.9769	96.4667	0.47263								61748-79	CM-SS4B	37	2013-08-20	21.4	3459879000		Sanidine	29	Iain Mason	Cuba Mesa	129.138.12.160	7.875	H2 Baseline = A @ 8/21/13 9:26 AM @ argonlab; H1 Baseline = A @ 8/21/13 9:26 AM @ argonlab; AX Baseline = A @ 8/21/13 9:26 AM @ argonlab; L1 Baseline = A @ 8/21/13 9:26 AM @ argonlab; L2 Baseline = A @ 8/21/13 9:26 AM @ argonlab; CDD Baseline = A @ 8/21/13 9:26 AM @ argonlab; Ar41 = A @ 8/21/13 9:26 AM @ argonlab; Ar40 = P @ 8/21/13 9:26 AM @ argonlab; Ar39 = P @ 8/21/13 9:26 AM @ argonlab; Ar38 …	Hole 29 (103)	ALLLLLAAAAAA	1	Pychron Script	1	Fusions CO2	4	4	0	4	0	30	30	193			0	0.0178152
	68	4	6.03944	-0.0060477	0.1114	0.21344	-	99.444	97.6743	0.655642								61748-68	CM-SS4B	37	2013-08-20	19.6	3459872000		Sanidine	29	Iain Mason	Cuba Mesa	129.138.12.160	7.875	H2 Baseline = A @ 8/21/13 9:26 AM @ argonlab; H1 Baseline = A @ 8/21/13 9:26 AM @ argonlab; AX Baseline = A @ 8/21/13 9:26 AM @ argonlab; L1 Baseline = A @ 8/21/13 9:26 AM @ argonlab; L2 Baseline = A @ 8/21/13 9:26 AM @ argonlab; CDD Baseline = A @ 8/21/13 9:26 AM @ argonlab; Ar41 = A @ 8/21/13 9:26 AM @ argonlab; Ar40 = P @ 8/21/13 9:26 AM @ argonlab; Ar39 = P @ 8/21/13 9:26 AM @ argonlab; Ar38 …	Hole 29 (103)	ALLLLLAAAAAA	1	Pychron Script	1	Fusions CO2	4	4	0	4	0	30	30	182			0	0.024339
	08	4	6.1764	-0.0177858	0.0181	1.25615	-	99.8906	100.268	0.115979								61748-08	CM-SS4B	37	2013-08-20	9	3459834000		Sanidine	29	Iain Mason	Cuba Mesa	129.138.12.160	7.875	H2 Baseline = A @ 8/21/13 9:26 AM @ argonlab; H1 Baseline = A @ 8/21/13 9:26 AM @ argonlab; AX Baseline = A @ 8/21/13 9:26 AM @ argonlab; L1 Baseline = A @ 8/21/13 9:26 AM @ argonlab; L2 Baseline = A @ 8/21/13 9:26 AM @ argonlab; CDD Baseline = A @ 8/21/13 9:26 AM @ argonlab; Ar41 = A @ 8/21/13 9:26 AM @ argonlab; Ar40 = P @ 8/21/13 9:26 AM @ argonlab; Ar39 = P @ 8/21/13 9:26 AM @ argonlab; Ar38 …	Hole 29 (103)	ALLLLLAAAAAA	1	Pychron Script	1	Fusions CO2	4	4	0	4	0	30	30	122			0	-0.0266372
	83	4	8.02001	-0.0796132	4.2245	0.327956	-	84.2123	109.509	0.569141								61748-83	CM-SS4B	37	2013-08-20	21.8167	3459880000		Sanidine	29	Iain Mason	Cuba Mesa	129.138.12.160	7.875	H2 Baseline = A @ 8/21/13 9:26 AM @ argonlab; H1 Baseline = A @ 8/21/13 9:26 AM @ argonlab; AX Baseline = A @ 8/21/13 9:26 AM @ argonlab; L1 Baseline = A @ 8/21/13 9:26 AM @ argonlab; L2 Baseline = A @ 8/21/13 9:26 AM @ argonlab; CDD Baseline = A @ 8/21/13 9:26 AM @ argonlab; Ar41 = A @ 8/21/13 9:26 AM @ argonlab; Ar40 = P @ 8/21/13 9:26 AM @ argonlab; Ar39 = P @ 8/21/13 9:26 AM @ argonlab; Ar38 …	Hole 29 (103)	ALLLLLAAAAAA	1	Pychron Script	1	Fusions CO2	4	4	0	4	0	30	30	197			0	-0.0048948
	77	4	6.8655	0.0110886	0.0311	1.28195	46.0116	99.8785	111.124	0.133407								61748-77	CM-SS4B	37	2013-08-20	20.9833	3459877000		Sanidine	29	Iain Mason	Cuba Mesa	129.138.12.160	7.875	H2 Baseline = A @ 8/21/13 9:26 AM @ argonlab; H1 Baseline = A @ 8/21/13 9:26 AM @ argonlab; AX Baseline = A @ 8/21/13 9:26 AM @ argonlab; L1 Baseline = A @ 8/21/13 9:26 AM @ argonlab; L2 Baseline = A @ 8/21/13 9:26 AM @ argonlab; CDD Baseline = A @ 8/21/13 9:26 AM @ argonlab; Ar41 = A @ 8/21/13 9:26 AM @ argonlab; Ar40 = P @ 8/21/13 9:26 AM @ argonlab; Ar39 = P @ 8/21/13 9:26 AM @ argonlab; Ar38 …	Hole 29 (103)	ALLLLLAAAAAA	1	Pychron Script	1	Fusions CO2	4	4	0	4	0	30	30	191			0	0.0569052
	40	4	7.28281	0.0172077	0.0101	0.518839	29.6497	99.9736	117.782	0.31087								61748-40	CM-SS4B	37	2013-08-20	14.4667	3459854000		Sanidine	29	Iain Mason	Cuba Mesa	129.138.12.160	7.875	H2 Baseline = A @ 8/21/13 9:26 AM @ argonlab; H1 Baseline = A @ 8/21/13 9:26 AM @ argonlab; AX Baseline = A @ 8/21/13 9:26 AM @ argonlab; L1 Baseline = A @ 8/21/13 9:26 AM @ argonlab; L2 Baseline = A @ 8/21/13 9:26 AM @ argonlab; CDD Baseline = A @ 8/21/13 9:26 AM @ argonlab; Ar41 = A @ 8/21/13 9:26 AM @ argonlab; Ar40 = P @ 8/21/13 9:26 AM @ argonlab; Ar39 = P @ 8/21/13 9:26 AM @ argonlab; Ar38 …	Hole 29 (103)	ALLLLLAAAAAA	1	Pychron Script	1	Fusions CO2	4	4	0	4	0	30	30	154			0	0.0406138
	58	4	7.88346	-0.0132897	0.0455	0.644769	-	99.8168	126.981	0.26689								61748-58	CM-SS4B	37	2013-08-20	17.6833	3459865000		Sanidine	29	Iain Mason	Cuba Mesa	129.138.12.160	7.875	H2 Baseline = A @ 8/21/13 9:26 AM @ argonlab; H1 Baseline = A @ 8/21/13 9:26 AM @ argonlab; AX Baseline = A @ 8/21/13 9:26 AM @ argonlab; L1 Baseline = A @ 8/21/13 9:26 AM @ argonlab; L2 Baseline = A @ 8/21/13 9:26 AM @ argonlab; CDD Baseline = A @ 8/21/13 9:26 AM @ argonlab; Ar41 = A @ 8/21/13 9:26 AM @ argonlab; Ar40 = P @ 8/21/13 9:26 AM @ argonlab; Ar39 = P @ 8/21/13 9:26 AM @ argonlab; Ar38 …	Hole 29 (103)	ALLLLLAAAAAA	1	Pychron Script	1	Fusions CO2	4	4	0	4	0	30	30	172			0	-0.0099416
	21	4	8.06177	-0.0557718	0.1518	0.307565	-	99.3822	129.207	0.529626								61748-21	CM-SS4B	37	2013-08-20	11.3833	3459843000		Sanidine	29	Iain Mason	Cuba Mesa	129.138.12.160	7.875	H2 Baseline = A @ 8/21/13 9:26 AM @ argonlab; H1 Baseline = A @ 8/21/13 9:26 AM @ argonlab; AX Baseline = A @ 8/21/13 9:26 AM @ argonlab; L1 Baseline = A @ 8/21/13 9:26 AM @ argonlab; L2 Baseline = A @ 8/21/13 9:26 AM @ argonlab; CDD Baseline = A @ 8/21/13 9:26 AM @ argonlab; Ar41 = A @ 8/21/13 9:26 AM @ argonlab; Ar40 = P @ 8/21/13 9:26 AM @ argonlab; Ar39 = P @ 8/21/13 9:26 AM @ argonlab; Ar38 …	Hole 29 (103)	ALLLLLAAAAAA	1	Pychron Script	1	Fusions CO2	4	4	0	4	0	30	30	135			0	-0.0091667
	71	4	8.14301	0.0126658	0.0713	1.3996	40.282	99.7524	130.94	0.148866								61748-71	CM-SS4B	37	2013-08-20	19.9167	3459873000		Sanidine	29	Iain Mason	Cuba Mesa	129.138.12.160	7.875	H2 Baseline = A @ 8/21/13 9:26 AM @ argonlab; H1 Baseline = A @ 8/21/13 9:26 AM @ argonlab; AX Baseline = A @ 8/21/13 9:26 AM @ argonlab; L1 Baseline = A @ 8/21/13 9:26 AM @ argonlab; L2 Baseline = A @ 8/21/13 9:26 AM @ argonlab; CDD Baseline = A @ 8/21/13 9:26 AM @ argonlab; Ar41 = A @ 8/21/13 9:26 AM @ argonlab; Ar40 = P @ 8/21/13 9:26 AM @ argonlab; Ar39 = P @ 8/21/13 9:26 AM @ argonlab; Ar38 …	Hole 29 (103)	ALLLLLAAAAAA	1	Pychron Script	1	Fusions CO2	4	4	0	4	0	30	30	185			0	0.027639
	87	4	8.59755	0.091244	0.0482	0.343049	5.59164	99.9255	138.224	0.573487								61748-87	CM-SS4B	37	2013-08-20	22.6667	3459883000		Sanidine	29	Iain Mason	Cuba Mesa	129.138.12.160	7.875	H2 Baseline = A @ 8/21/13 9:26 AM @ argonlab; H1 Baseline = A @ 8/21/13 9:26 AM @ argonlab; AX Baseline = A @ 8/21/13 9:26 AM @ argonlab; L1 Baseline = A @ 8/21/13 9:26 AM @ argonlab; L2 Baseline = A @ 8/21/13 9:26 AM @ argonlab; CDD Baseline = A @ 8/21/13 9:26 AM @ argonlab; Ar41 = A @ 8/21/13 9:26 AM @ argonlab; Ar40 = P @ 8/21/13 9:26 AM @ argonlab; Ar39 = P @ 8/21/13 9:26 AM @ argonlab; Ar38 …	Hole 29 (103)	ALLLLLAAAAAA	1	Pychron Script	1	Fusions CO2	4	4	0	4	0	30	30	201			0	0.0258807
	10	4	9.01047	-0.0144601	0.0516	0.689019	-	99.8173	144.452	0.306554								61748-10	CM-SS4B	37	2013-08-20	9.36667	3459835000		Sanidine	29	Iain Mason	Cuba Mesa	129.138.12.160	7.875	H2 Baseline = A @ 8/21/13 9:26 AM @ argonlab; H1 Baseline = A @ 8/21/13 9:26 AM @ argonlab; AX Baseline = A @ 8/21/13 9:26 AM @ argonlab; L1 Baseline = A @ 8/21/13 9:26 AM @ argonlab; L2 Baseline = A @ 8/21/13 9:26 AM @ argonlab; CDD Baseline = A @ 8/21/13 9:26 AM @ argonlab; Ar41 = A @ 8/21/13 9:26 AM @ argonlab; Ar40 = P @ 8/21/13 9:26 AM @ argonlab; Ar39 = P @ 8/21/13 9:26 AM @ argonlab; Ar38 …	Hole 29 (103)	ALLLLLAAAAAA	1	Pychron Script	1	Fusions CO2	4	4	0	4	0	30	30	124			0	0.0003
	98	4	9.47076	0.0235559	0.2822	0.67371	21.6593	99.1338	150.547	0.362965								61748-98	CM-SS4B	37	2013-08-21	0.683333	3459890000		Sanidine	29	Iain Mason	Cuba Mesa	129.138.12.160	7.875	H2 Baseline = A @ 8/21/13 9:26 AM @ argonlab; H1 Baseline = A @ 8/21/13 9:26 AM @ argonlab; AX Baseline = A @ 8/21/13 9:26 AM @ argonlab; L1 Baseline = A @ 8/21/13 9:26 AM @ argonlab; L2 Baseline = A @ 8/21/13 9:26 AM @ argonlab; CDD Baseline = A @ 8/21/13 9:26 AM @ argonlab; Ar41 = A @ 8/21/13 9:26 AM @ argonlab; Ar40 = P @ 8/21/13 9:26 AM @ argonlab; Ar39 = P @ 8/21/13 9:26 AM @ argonlab; Ar38 …	Hole 29 (103)	ALLLLLAAAAAA	1	Pychron Script	1	Fusions CO2	4	4	0	4	0	30	30	212			0	-0.0288345
	96	4	9.51173	-0.0003337	0.0834	0.734568	-	99.7369	152.053	0.276718								61748-96	CM-SS4B	37	2013-08-21	0.05	3459888000		Sanidine	29	Iain Mason	Cuba Mesa	129.138.12.160	7.875	H2 Baseline = A @ 8/21/13 9:26 AM @ argonlab; H1 Baseline = A @ 8/21/13 9:26 AM @ argonlab; AX Baseline = A @ 8/21/13 9:26 AM @ argonlab; L1 Baseline = A @ 8/21/13 9:26 AM @ argonlab; L2 Baseline = A @ 8/21/13 9:26 AM @ argonlab; CDD Baseline = A @ 8/21/13 9:26 AM @ argonlab; Ar41 = A @ 8/21/13 9:26 AM @ argonlab; Ar40 = P @ 8/21/13 9:26 AM @ argonlab; Ar39 = P @ 8/21/13 9:26 AM @ argonlab; Ar38 …	Hole 29 (103)	ALLLLLAAAAAA	1	Pychron Script	1	Fusions CO2	4	4	0	4	0	30	30	210			0	-0.0148345
	63	4	10.0352	0.0365828	0.0441	1.20518	13.9466	99.8982	160.324	0.211922								61748-63	CM-SS4B	37	2013-08-20	18.4333	3459868000		Sanidine	29	Iain Mason	Cuba Mesa	129.138.12.160	7.875	H2 Baseline = A @ 8/21/13 9:26 AM @ argonlab; H1 Baseline = A @ 8/21/13 9:26 AM @ argonlab; AX Baseline = A @ 8/21/13 9:26 AM @ argonlab; L1 Baseline = A @ 8/21/13 9:26 AM @ argonlab; L2 Baseline = A @ 8/21/13 9:26 AM @ argonlab; CDD Baseline = A @ 8/21/13 9:26 AM @ argonlab; Ar41 = A @ 8/21/13 9:26 AM @ argonlab; Ar40 = P @ 8/21/13 9:26 AM @ argonlab; Ar39 = P @ 8/21/13 9:26 AM @ argonlab; Ar38 …	Hole 29 (103)	ALLLLLAAAAAA	1	Pychron Script	1	Fusions CO2	4	4	0	4	0	30	30	177			0	0.0280585
	61	4	10.0966	-0.0014457	0.0619	1.01241	-	99.8181	161.135	0.219486								61748-61	CM-SS4B	37	2013-08-20	18.2167	3459867000		Sanidine	29	Iain Mason	Cuba Mesa	129.138.12.160	7.875	H2 Baseline = A @ 8/21/13 9:26 AM @ argonlab; H1 Baseline = A @ 8/21/13 9:26 AM @ argonlab; AX Baseline = A @ 8/21/13 9:26 AM @ argonlab; L1 Baseline = A @ 8/21/13 9:26 AM @ argonlab; L2 Baseline = A @ 8/21/13 9:26 AM @ argonlab; CDD Baseline = A @ 8/21/13 9:26 AM @ argonlab; Ar41 = A @ 8/21/13 9:26 AM @ argonlab; Ar40 = P @ 8/21/13 9:26 AM @ argonlab; Ar39 = P @ 8/21/13 9:26 AM @ argonlab; Ar38 …	Hole 29 (103)	ALLLLLAAAAAA	1	Pychron Script	1	Fusions CO2	4	4	0	4	0	30	30	175			0	-0.0011115
	15	4	10.3924	0.166612	0.0598	0.18842	3.06223	99.9595	165.895	1.17691								61748-15	CM-SS4B	37	2013-08-20	10.1167	3459838000		Sanidine	29	Iain Mason	Cuba Mesa	129.138.12.160	7.875	H2 Baseline = A @ 8/21/13 9:26 AM @ argonlab; H1 Baseline = A @ 8/21/13 9:26 AM @ argonlab; AX Baseline = A @ 8/21/13 9:26 AM @ argonlab; L1 Baseline = A @ 8/21/13 9:26 AM @ argonlab; L2 Baseline = A @ 8/21/13 9:26 AM @ argonlab; CDD Baseline = A @ 8/21/13 9:26 AM @ argonlab; Ar41 = A @ 8/21/13 9:26 AM @ argonlab; Ar40 = P @ 8/21/13 9:26 AM @ argonlab; Ar39 = P @ 8/21/13 9:26 AM @ argonlab; Ar38 …	Hole 29 (103)	ALLLLLAAAAAA	1	Pychron Script	1	Fusions CO2	4	4	0	4	0	30	30	129			0	-0.029675
	91	4	11.0558	0.0313713	0.0427	1.13329	16.2634	99.9085	175.897	0.222713								61748-91	CM-SS4B	37	2013-08-20	23.3	3459886000		Sanidine	29	Iain Mason	Cuba Mesa	129.138.12.160	7.875	H2 Baseline = A @ 8/21/13 9:26 AM @ argonlab; H1 Baseline = A @ 8/21/13 9:26 AM @ argonlab; AX Baseline = A @ 8/21/13 9:26 AM @ argonlab; L1 Baseline = A @ 8/21/13 9:26 AM @ argonlab; L2 Baseline = A @ 8/21/13 9:26 AM @ argonlab; CDD Baseline = A @ 8/21/13 9:26 AM @ argonlab; Ar41 = A @ 8/21/13 9:26 AM @ argonlab; Ar40 = P @ 8/21/13 9:26 AM @ argonlab; Ar39 = P @ 8/21/13 9:26 AM @ argonlab; Ar38 …	Hole 29 (103)	ALLLLLAAAAAA	1	Pychron Script	1	Fusions CO2	4	4	0	4	0	30	30	205			0	0.0917807
	34	4	11.065	-0.0005082	0.0148	1.50256	-	99.96	176.119	0.169403								61748-34	CM-SS4B	37	2013-08-20	13.4	3459850000		Sanidine	29	Iain Mason	Cuba Mesa	129.138.12.160	7.875	H2 Baseline = A @ 8/21/13 9:26 AM @ argonlab; H1 Baseline = A @ 8/21/13 9:26 AM @ argonlab; AX Baseline = A @ 8/21/13 9:26 AM @ argonlab; L1 Baseline = A @ 8/21/13 9:26 AM @ argonlab; L2 Baseline = A @ 8/21/13 9:26 AM @ argonlab; CDD Baseline = A @ 8/21/13 9:26 AM @ argonlab; Ar41 = A @ 8/21/13 9:26 AM @ argonlab; Ar40 = P @ 8/21/13 9:26 AM @ argonlab; Ar39 = P @ 8/21/13 9:26 AM @ argonlab; Ar38 …	Hole 29 (103)	ALLLLLAAAAAA	1	Pychron Script	1	Fusions CO2	4	4	0	4	0	30	30	148			0	0.0008826
	102	4	11.8105	-0.002298	0.7725	0.533869	-	98.0511	184.001	0.45437								61748-102	CM-SS4B	37	2013-08-21	1.33333	3459893000		Sanidine	29	Iain Mason	Cuba Mesa	129.138.12.160	7.875	H2 Baseline = A @ 8/21/13 9:26 AM @ argonlab; H1 Baseline = A @ 8/21/13 9:26 AM @ argonlab; AX Baseline = A @ 8/21/13 9:26 AM @ argonlab; L1 Baseline = A @ 8/21/13 9:26 AM @ argonlab; L2 Baseline = A @ 8/21/13 9:26 AM @ argonlab; CDD Baseline = A @ 8/21/13 9:26 AM @ argonlab; Ar41 = A @ 8/21/13 9:26 AM @ argonlab; Ar40 = P @ 8/21/13 9:26 AM @ argonlab; Ar39 = P @ 8/21/13 9:26 AM @ argonlab; Ar38 …	Hole 29 (103)	ALLLLLAAAAAA	1	Pychron Script	1	Fusions CO2	4	4	0	4	0	30	30	216			0	0.0462834
	07	4	12.2193	-0.0014388	0.0547	1.87442	-	99.8668	193.394	0.171786								61748-07	CM-SS4B	37	2013-08-20	8.68333	3459833000		Sanidine	29	Iain Mason	Cuba Mesa	129.138.12.160	7.875	H2 Baseline = A @ 8/21/13 9:26 AM @ argonlab; H1 Baseline = A @ 8/21/13 9:26 AM @ argonlab; AX Baseline = A @ 8/21/13 9:26 AM @ argonlab; L1 Baseline = A @ 8/21/13 9:26 AM @ argonlab; L2 Baseline = A @ 8/21/13 9:26 AM @ argonlab; CDD Baseline = A @ 8/21/13 9:26 AM @ argonlab; Ar41 = A @ 8/21/13 9:26 AM @ argonlab; Ar40 = P @ 8/21/13 9:26 AM @ argonlab; Ar39 = P @ 8/21/13 9:26 AM @ argonlab; Ar38 …	Hole 29 (103)	ALLLLLAAAAAA	1	Pychron Script	1	Fusions CO2	4	4	0	4	0	30	30	121			0	0.0292628
	51	4	12.5325	-0.0056302	0.0732	0.420214	-	99.818	198.002	0.580561								61748-51	CM-SS4B	37	2013-08-20	16.3	3459860000		Sanidine	29	Iain Mason	Cuba Mesa	129.138.12.160	7.875	H2 Baseline = A @ 8/21/13 9:26 AM @ argonlab; H1 Baseline = A @ 8/21/13 9:26 AM @ argonlab; AX Baseline = A @ 8/21/13 9:26 AM @ argonlab; L1 Baseline = A @ 8/21/13 9:26 AM @ argonlab; L2 Baseline = A @ 8/21/13 9:26 AM @ argonlab; CDD Baseline = A @ 8/21/13 9:26 AM @ argonlab; Ar41 = A @ 8/21/13 9:26 AM @ argonlab; Ar40 = P @ 8/21/13 9:26 AM @ argonlab; Ar39 = P @ 8/21/13 9:26 AM @ argonlab; Ar38 …	Hole 29 (103)	ALLLLLAAAAAA	1	Pychron Script	1	Fusions CO2	4	4	0	4	0	30	30	165			0	0.0003
	85	4	12.5658	-0.003876	0.07	0.595352	-	99.8302	198.525	0.487139								61748-85	CM-SS4B	37	2013-08-20	22.25	3459882000		Sanidine	29	Iain Mason	Cuba Mesa	129.138.12.160	7.875	H2 Baseline = A @ 8/21/13 9:26 AM @ argonlab; H1 Baseline = A @ 8/21/13 9:26 AM @ argonlab; AX Baseline = A @ 8/21/13 9:26 AM @ argonlab; L1 Baseline = A @ 8/21/13 9:26 AM @ argonlab; L2 Baseline = A @ 8/21/13 9:26 AM @ argonlab; CDD Baseline = A @ 8/21/13 9:26 AM @ argonlab; Ar41 = A @ 8/21/13 9:26 AM @ argonlab; Ar40 = P @ 8/21/13 9:26 AM @ argonlab; Ar39 = P @ 8/21/13 9:26 AM @ argonlab; Ar38 …	Hole 29 (103)	ALLLLLAAAAAA	1	Pychron Script	1	Fusions CO2	4	4	0	4	0	30	30	199			0	0.0591807
	16	4	12.9721	0.012634	0.0378	0.523359	40.3834	99.9196	204.777	0.534401								61748-16	CM-SS4B	37	2013-08-20	10.2167	3459838000		Sanidine	29	Iain Mason	Cuba Mesa	129.138.12.160	7.875	H2 Baseline = A @ 8/21/13 9:26 AM @ argonlab; H1 Baseline = A @ 8/21/13 9:26 AM @ argonlab; AX Baseline = A @ 8/21/13 9:26 AM @ argonlab; L1 Baseline = A @ 8/21/13 9:26 AM @ argonlab; L2 Baseline = A @ 8/21/13 9:26 AM @ argonlab; CDD Baseline = A @ 8/21/13 9:26 AM @ argonlab; Ar41 = A @ 8/21/13 9:26 AM @ argonlab; Ar40 = P @ 8/21/13 9:26 AM @ argonlab; Ar39 = P @ 8/21/13 9:26 AM @ argonlab; Ar38 …	Hole 29 (103)	ALLLLLAAAAAA	1	Pychron Script	1	Fusions CO2	4	4	0	4	0	30	30	130			0	-0.007475
	103	4	13.2581	0.01285	0.1002	0.698367	39.7046	99.7825	208.775	0.406918								61748-103	CM-SS4B	37	2013-08-21	1.43333	3459893000		Sanidine	29	Iain Mason	Cuba Mesa	129.138.12.160	7.875	H2 Baseline = A @ 8/21/13 9:26 AM @ argonlab; H1 Baseline = A @ 8/21/13 9:26 AM @ argonlab; AX Baseline = A @ 8/21/13 9:26 AM @ argonlab; L1 Baseline = A @ 8/21/13 9:26 AM @ argonlab; L2 Baseline = A @ 8/21/13 9:26 AM @ argonlab; CDD Baseline = A @ 8/21/13 9:26 AM @ argonlab; Ar41 = A @ 8/21/13 9:26 AM @ argonlab; Ar40 = P @ 8/21/13 9:26 AM @ argonlab; Ar39 = P @ 8/21/13 9:26 AM @ argonlab; Ar38 …	Hole 29 (103)	ALLLLLAAAAAA	1	Pychron Script	1	Fusions CO2	4	4	0	4	0	30	30	217			0	0.0101834
	12	4	13.675	0.361744	0.3976	0.0693421	1.4104	99.3617	214.162	3.33457								61748-12	CM-SS4B	37	2013-08-20	9.8	3459837000		Sanidine	29	Iain Mason	Cuba Mesa	129.138.12.160	7.875	H2 Baseline = A @ 8/21/13 9:26 AM @ argonlab; H1 Baseline = A @ 8/21/13 9:26 AM @ argonlab; AX Baseline = A @ 8/21/13 9:26 AM @ argonlab; L1 Baseline = A @ 8/21/13 9:26 AM @ argonlab; L2 Baseline = A @ 8/21/13 9:26 AM @ argonlab; CDD Baseline = A @ 8/21/13 9:26 AM @ argonlab; Ar41 = A @ 8/21/13 9:26 AM @ argonlab; Ar40 = P @ 8/21/13 9:26 AM @ argonlab; Ar39 = P @ 8/21/13 9:26 AM @ argonlab; Ar38 …	Hole 29 (103)	ALLLLLAAAAAA	1	Pychron Script	1	Fusions CO2	4	4	0	4	0	30	30	126			0	-0.005375
	06	4	14.1594	0.008571	-0.001897	1.29075	59.5268	100.009	222.62	0.274565								61748-06	CM-SS4B	37	2013-08-20	8.58333	3459833000		Sanidine	29	Iain Mason	Cuba Mesa	129.138.12.160	7.875	H2 Baseline = A @ 8/21/13 9:26 AM @ argonlab; H1 Baseline = A @ 8/21/13 9:26 AM @ argonlab; AX Baseline = A @ 8/21/13 9:26 AM @ argonlab; L1 Baseline = A @ 8/21/13 9:26 AM @ argonlab; L2 Baseline = A @ 8/21/13 9:26 AM @ argonlab; CDD Baseline = A @ 8/21/13 9:26 AM @ argonlab; Ar41 = A @ 8/21/13 9:26 AM @ argonlab; Ar40 = P @ 8/21/13 9:26 AM @ argonlab; Ar39 = P @ 8/21/13 9:26 AM @ argonlab; Ar38 …	Hole 29 (103)	ALLLLLAAAAAA	1	Pychron Script	1	Fusions CO2	4	4	0	4	0	30	30	120			0	0.0370628
	24	4	14.3463	0.0148685	0.0457	1.00473	34.3144	99.9133	225.185	0.334861								61748-24	CM-SS4B	37	2013-08-20	11.7	3459844000		Sanidine	29	Iain Mason	Cuba Mesa	129.138.12.160	7.875	H2 Baseline = A @ 8/21/13 9:26 AM @ argonlab; H1 Baseline = A @ 8/21/13 9:26 AM @ argonlab; AX Baseline = A @ 8/21/13 9:26 AM @ argonlab; L1 Baseline = A @ 8/21/13 9:26 AM @ argonlab; L2 Baseline = A @ 8/21/13 9:26 AM @ argonlab; CDD Baseline = A @ 8/21/13 9:26 AM @ argonlab; Ar41 = A @ 8/21/13 9:26 AM @ argonlab; Ar40 = P @ 8/21/13 9:26 AM @ argonlab; Ar39 = P @ 8/21/13 9:26 AM @ argonlab; Ar38 …	Hole 29 (103)	ALLLLLAAAAAA	1	Pychron Script	1	Fusions CO2	4	4	0	4	0	30	30	138			0	-0.0017667
	03	4	14.5237	-0.0037236	0.0603	1.35493	-	99.8751	227.719	0.266126								61748-03	CM-SS4B	37	2013-08-20	8.03333	3459831000		Sanidine	29	Iain Mason	Cuba Mesa	129.138.12.160	7.875	H2 Baseline = A @ 8/21/13 9:26 AM @ argonlab; H1 Baseline = A @ 8/21/13 9:26 AM @ argonlab; AX Baseline = A @ 8/21/13 9:26 AM @ argonlab; L1 Baseline = A @ 8/21/13 9:26 AM @ argonlab; L2 Baseline = A @ 8/21/13 9:26 AM @ argonlab; CDD Baseline = A @ 8/21/13 9:26 AM @ argonlab; Ar41 = A @ 8/21/13 9:26 AM @ argonlab; Ar40 = P @ 8/21/13 9:26 AM @ argonlab; Ar39 = P @ 8/21/13 9:26 AM @ argonlab; Ar38 …	Hole 29 (103)	ALLLLLAAAAAA	1	Pychron Script	1	Fusions CO2	4	4	0	4	0	30	30	117			0	-0.0084997
	52	4	15.6119	0.0598236	0.1738	0.195459	8.52847	99.6953	243.301	1.49483								61748-52	CM-SS4B	37	2013-08-20	16.6333	3459862000		Sanidine	29	Iain Mason	Cuba Mesa	129.138.12.160	7.875	H2 Baseline = A @ 8/21/13 9:26 AM @ argonlab; H1 Baseline = A @ 8/21/13 9:26 AM @ argonlab; AX Baseline = A @ 8/21/13 9:26 AM @ argonlab; L1 Baseline = A @ 8/21/13 9:26 AM @ argonlab; L2 Baseline = A @ 8/21/13 9:26 AM @ argonlab; CDD Baseline = A @ 8/21/13 9:26 AM @ argonlab; Ar41 = A @ 8/21/13 9:26 AM @ argonlab; Ar40 = P @ 8/21/13 9:26 AM @ argonlab; Ar39 = P @ 8/21/13 9:26 AM @ argonlab; Ar38 …	Hole 29 (103)	ALLLLLAAAAAA	1	Pychron Script	1	Fusions CO2	4	4	0	4	0	30	30	166			0	-0.0090516
	17	4	15.9372	0.0127918	0.0187	0.901277	39.8852	99.9712	248.678	0.43312								61748-17	CM-SS4B	37	2013-08-20	10.3167	3459839000		Sanidine	29	Iain Mason	Cuba Mesa	129.138.12.160	7.875	H2 Baseline = A @ 8/21/13 9:26 AM @ argonlab; H1 Baseline = A @ 8/21/13 9:26 AM @ argonlab; AX Baseline = A @ 8/21/13 9:26 AM @ argonlab; L1 Baseline = A @ 8/21/13 9:26 AM @ argonlab; L2 Baseline = A @ 8/21/13 9:26 AM @ argonlab; CDD Baseline = A @ 8/21/13 9:26 AM @ argonlab; Ar41 = A @ 8/21/13 9:26 AM @ argonlab; Ar40 = P @ 8/21/13 9:26 AM @ argonlab; Ar39 = P @ 8/21/13 9:26 AM @ argonlab; Ar38 …	Hole 29 (103)	ALLLLLAAAAAA	1	Pychron Script	1	Fusions CO2	4	4	0	4	0	30	30	131			0	-0.046875
	97	4	17.2262	0.0044076	0.0205	2.05809	115.756	99.9669	267.385	0.215019								61748-97	CM-SS4B	37	2013-08-21	0.366667	3459889000		Sanidine	29	Iain Mason	Cuba Mesa	129.138.12.160	7.875	H2 Baseline = A @ 8/21/13 9:26 AM @ argonlab; H1 Baseline = A @ 8/21/13 9:26 AM @ argonlab; AX Baseline = A @ 8/21/13 9:26 AM @ argonlab; L1 Baseline = A @ 8/21/13 9:26 AM @ argonlab; L2 Baseline = A @ 8/21/13 9:26 AM @ argonlab; CDD Baseline = A @ 8/21/13 9:26 AM @ argonlab; Ar41 = A @ 8/21/13 9:26 AM @ argonlab; Ar40 = P @ 8/21/13 9:26 AM @ argonlab; Ar39 = P @ 8/21/13 9:26 AM @ argonlab; Ar38 …	Hole 29 (103)	ALLLLLAAAAAA	1	Pychron Script	1	Fusions CO2	4	4	0	4	0	30	30	211			0	0.0205655
	11	4	18.5414	-0.0592325	0.1334	0.35456	-	99.7605	285.731	1.06112								61748-11	CM-SS4B	37	2013-08-20	9.46667	3459836000		Sanidine	29	Iain Mason	Cuba Mesa	129.138.12.160	7.875	H2 Baseline = A @ 8/21/13 9:26 AM @ argonlab; H1 Baseline = A @ 8/21/13 9:26 AM @ argonlab; AX Baseline = A @ 8/21/13 9:26 AM @ argonlab; L1 Baseline = A @ 8/21/13 9:26 AM @ argonlab; L2 Baseline = A @ 8/21/13 9:26 AM @ argonlab; CDD Baseline = A @ 8/21/13 9:26 AM @ argonlab; Ar41 = A @ 8/21/13 9:26 AM @ argonlab; Ar40 = P @ 8/21/13 9:26 AM @ argonlab; Ar39 = P @ 8/21/13 9:26 AM @ argonlab; Ar38 …	Hole 29 (103)	ALLLLLAAAAAA	1	Pychron Script	1	Fusions CO2	4	4	0	4	0	30	30	125			0	-0.0126
	104	4	18.9688	-0.0315191	0.00235002	0.238031	-	99.9825	292.428	1.55933								61748-104	CM-SS4B	37	2013-08-21	1.53333	3459894000		Sanidine	29	Iain Mason	Cuba Mesa	129.138.12.160	7.875	H2 Baseline = A @ 8/21/13 9:26 AM @ argonlab; H1 Baseline = A @ 8/21/13 9:26 AM @ argonlab; AX Baseline = A @ 8/21/13 9:26 AM @ argonlab; L1 Baseline = A @ 8/21/13 9:26 AM @ argonlab; L2 Baseline = A @ 8/21/13 9:26 AM @ argonlab; CDD Baseline = A @ 8/21/13 9:26 AM @ argonlab; Ar41 = A @ 8/21/13 9:26 AM @ argonlab; Ar40 = P @ 8/21/13 9:26 AM @ argonlab; Ar39 = P @ 8/21/13 9:26 AM @ argonlab; Ar38 …	Hole 29 (103)	ALLLLLAAAAAA	1	Pychron Script	1	Fusions CO2	4	4	0	4	0	30	30	218			0	0.0186634
	93	4	50.9599	-0.388667	102.491	0.0105405	-	39.9802	312.392	34.1631								61748-93	CM-SS4B	37	2013-08-20	23.7333	3459887000		Sanidine	29	Iain Mason	Cuba Mesa	129.138.12.160	7.875	H2 Baseline = A @ 8/21/13 9:26 AM @ argonlab; H1 Baseline = A @ 8/21/13 9:26 AM @ argonlab; AX Baseline = A @ 8/21/13 9:26 AM @ argonlab; L1 Baseline = A @ 8/21/13 9:26 AM @ argonlab; L2 Baseline = A @ 8/21/13 9:26 AM @ argonlab; CDD Baseline = A @ 8/21/13 9:26 AM @ argonlab; Ar41 = A @ 8/21/13 9:26 AM @ argonlab; Ar40 = P @ 8/21/13 9:26 AM @ argonlab; Ar39 = P @ 8/21/13 9:26 AM @ argonlab; Ar38 …	Hole 29 (103)	ALLLLLAAAAAA	1	Pychron Script	1	Fusions CO2	4	4	0	4	0	30	30	207			0	-0.0416345
	31	4	20.854	0.0152669	0.0436	0.64323	33.419	99.9443	319	0.692243								61748-31	CM-SS4B	37	2013-08-20	13.0833	3459849000		Sanidine	29	Iain Mason	Cuba Mesa	129.138.12.160	7.875	H2 Baseline = A @ 8/21/13 9:26 AM @ argonlab; H1 Baseline = A @ 8/21/13 9:26 AM @ argonlab; AX Baseline = A @ 8/21/13 9:26 AM @ argonlab; L1 Baseline = A @ 8/21/13 9:26 AM @ argonlab; L2 Baseline = A @ 8/21/13 9:26 AM @ argonlab; CDD Baseline = A @ 8/21/13 9:26 AM @ argonlab; Ar41 = A @ 8/21/13 9:26 AM @ argonlab; Ar40 = P @ 8/21/13 9:26 AM @ argonlab; Ar39 = P @ 8/21/13 9:26 AM @ argonlab; Ar38 …	Hole 29 (103)	ALLLLLAAAAAA	1	Pychron Script	1	Fusions CO2	4	4	0	4	0	30	30	145			0	0.0201826
	76	4	23.3606	0.0263931	0.0653	0.268608	19.331	99.9246	353.804	1.69915								61748-76	CM-SS4B	37	2013-08-20	20.8833	3459877000		Sanidine	29	Iain Mason	Cuba Mesa	129.138.12.160	7.875	H2 Baseline = A @ 8/21/13 9:26 AM @ argonlab; H1 Baseline = A @ 8/21/13 9:26 AM @ argonlab; AX Baseline = A @ 8/21/13 9:26 AM @ argonlab; L1 Baseline = A @ 8/21/13 9:26 AM @ argonlab; L2 Baseline = A @ 8/21/13 9:26 AM @ argonlab; CDD Baseline = A @ 8/21/13 9:26 AM @ argonlab; Ar41 = A @ 8/21/13 9:26 AM @ argonlab; Ar40 = P @ 8/21/13 9:26 AM @ argonlab; Ar39 = P @ 8/21/13 9:26 AM @ argonlab; Ar38 …	Hole 29 (103)	ALLLLLAAAAAA	1	Pychron Script	1	Fusions CO2	4	4	0	4	0	30	30	190			0	-0.0011848
	81	4	24.6821	0.051583	0.00136723	0.293325	9.89093	100.014	372.227	1.45428								61748-81	CM-SS4B	37	2013-08-20	21.6	3459879000		Sanidine	29	Iain Mason	Cuba Mesa	129.138.12.160	7.875	H2 Baseline = A @ 8/21/13 9:26 AM @ argonlab; H1 Baseline = A @ 8/21/13 9:26 AM @ argonlab; AX Baseline = A @ 8/21/13 9:26 AM @ argonlab; L1 Baseline = A @ 8/21/13 9:26 AM @ argonlab; L2 Baseline = A @ 8/21/13 9:26 AM @ argonlab; CDD Baseline = A @ 8/21/13 9:26 AM @ argonlab; Ar41 = A @ 8/21/13 9:26 AM @ argonlab; Ar40 = P @ 8/21/13 9:26 AM @ argonlab; Ar39 = P @ 8/21/13 9:26 AM @ argonlab; Ar38 …	Hole 29 (103)	ALLLLLAAAAAA	1	Pychron Script	1	Fusions CO2	4	4	0	4	0	30	30	195			0	0.0469152
	44	4	25.1277	0.0264925	0.1797	0.178461	19.2584	99.7956	377.547	2.42238								61748-44	CM-SS4B	37	2013-08-20	15.3167	3459857000		Sanidine	29	Iain Mason	Cuba Mesa	129.138.12.160	7.875	H2 Baseline = A @ 8/21/13 9:26 AM @ argonlab; H1 Baseline = A @ 8/21/13 9:26 AM @ argonlab; AX Baseline = A @ 8/21/13 9:26 AM @ argonlab; L1 Baseline = A @ 8/21/13 9:26 AM @ argonlab; L2 Baseline = A @ 8/21/13 9:26 AM @ argonlab; CDD Baseline = A @ 8/21/13 9:26 AM @ argonlab; Ar41 = A @ 8/21/13 9:26 AM @ argonlab; Ar40 = P @ 8/21/13 9:26 AM @ argonlab; Ar39 = P @ 8/21/13 9:26 AM @ argonlab; Ar38 …	Hole 29 (103)	ALLLLLAAAAAA	1	Pychron Script	1	Fusions CO2	4	4	0	4	0	30	30	158			0	-0.0172194
	78	4	25.3243	0.0186412	-0.0271	0.183661	27.3697	100.038	381.046	2.46751								61748-78	CM-SS4B	37	2013-08-20	21.3	3459878000		Sanidine	29	Iain Mason	Cuba Mesa	129.138.12.160	7.875	H2 Baseline = A @ 8/21/13 9:26 AM @ argonlab; H1 Baseline = A @ 8/21/13 9:26 AM @ argonlab; AX Baseline = A @ 8/21/13 9:26 AM @ argonlab; L1 Baseline = A @ 8/21/13 9:26 AM @ argonlab; L2 Baseline = A @ 8/21/13 9:26 AM @ argonlab; CDD Baseline = A @ 8/21/13 9:26 AM @ argonlab; Ar41 = A @ 8/21/13 9:26 AM @ argonlab; Ar40 = P @ 8/21/13 9:26 AM @ argonlab; Ar39 = P @ 8/21/13 9:26 AM @ argonlab; Ar38 …	Hole 29 (103)	ALLLLLAAAAAA	1	Pychron Script	1	Fusions CO2	4	4	0	4	0	30	30	192			0	-0.0051848
	106	4	25.9055	-0.0100821	0.0222	0.952931	-	99.971	388.686	0.575843								61748-106	CM-SS4B	37	2013-08-21	1.75	3459894000		Sanidine	29	Iain Mason	Cuba Mesa	129.138.12.160	7.875	H2 Baseline = A @ 8/21/13 9:26 AM @ argonlab; H1 Baseline = A @ 8/21/13 9:26 AM @ argonlab; AX Baseline = A @ 8/21/13 9:26 AM @ argonlab; L1 Baseline = A @ 8/21/13 9:26 AM @ argonlab; L2 Baseline = A @ 8/21/13 9:26 AM @ argonlab; CDD Baseline = A @ 8/21/13 9:26 AM @ argonlab; Ar41 = A @ 8/21/13 9:26 AM @ argonlab; Ar40 = P @ 8/21/13 9:26 AM @ argonlab; Ar39 = P @ 8/21/13 9:26 AM @ argonlab; Ar38 …	Hole 29 (103)	ALLLLLAAAAAA	1	Pychron Script	1	Fusions CO2	4	4	0	4	0	30	30	220			0	-0.0059166
	46	4	26.2686	0.0157877	0.0777	0.460291	32.3166	99.9159	393.4	1.12621								61748-46	CM-SS4B	37	2013-08-20	15.5333	3459858000		Sanidine	29	Iain Mason	Cuba Mesa	129.138.12.160	7.875	H2 Baseline = A @ 8/21/13 9:26 AM @ argonlab; H1 Baseline = A @ 8/21/13 9:26 AM @ argonlab; AX Baseline = A @ 8/21/13 9:26 AM @ argonlab; L1 Baseline = A @ 8/21/13 9:26 AM @ argonlab; L2 Baseline = A @ 8/21/13 9:26 AM @ argonlab; CDD Baseline = A @ 8/21/13 9:26 AM @ argonlab; Ar41 = A @ 8/21/13 9:26 AM @ argonlab; Ar40 = P @ 8/21/13 9:26 AM @ argonlab; Ar39 = P @ 8/21/13 9:26 AM @ argonlab; Ar38 …	Hole 29 (103)	ALLLLLAAAAAA	1	Pychron Script	1	Fusions CO2	4	4	0	4	0	30	30	160			0	0.0276806
	42	4	27.4899	-0.00185	0.0866	1.63426	-	99.9057	409.748	0.364089								61748-42	CM-SS4B	37	2013-08-20	14.8833	3459855000		Sanidine	29	Iain Mason	Cuba Mesa	129.138.12.160	7.875	H2 Baseline = A @ 8/21/13 9:26 AM @ argonlab; H1 Baseline = A @ 8/21/13 9:26 AM @ argonlab; AX Baseline = A @ 8/21/13 9:26 AM @ argonlab; L1 Baseline = A @ 8/21/13 9:26 AM @ argonlab; L2 Baseline = A @ 8/21/13 9:26 AM @ argonlab; CDD Baseline = A @ 8/21/13 9:26 AM @ argonlab; Ar41 = A @ 8/21/13 9:26 AM @ argonlab; Ar40 = P @ 8/21/13 9:26 AM @ argonlab; Ar39 = P @ 8/21/13 9:26 AM @ argonlab; Ar38 …	Hole 29 (103)	ALLLLLAAAAAA	1	Pychron Script	1	Fusions CO2	4	4	0	4	0	30	30	156			0	0.0702138
	56	4	27.9503	0.0090428	0.099	0.539077	56.421	99.8965	415.857	0.976678								61748-56	CM-SS4B	37	2013-08-20	17.2667	3459864000		Sanidine	29	Iain Mason	Cuba Mesa	129.138.12.160	7.875	H2 Baseline = A @ 8/21/13 9:26 AM @ argonlab; H1 Baseline = A @ 8/21/13 9:26 AM @ argonlab; AX Baseline = A @ 8/21/13 9:26 AM @ argonlab; L1 Baseline = A @ 8/21/13 9:26 AM @ argonlab; L2 Baseline = A @ 8/21/13 9:26 AM @ argonlab; CDD Baseline = A @ 8/21/13 9:26 AM @ argonlab; Ar41 = A @ 8/21/13 9:26 AM @ argonlab; Ar40 = P @ 8/21/13 9:26 AM @ argonlab; Ar39 = P @ 8/21/13 9:26 AM @ argonlab; Ar38 …	Hole 29 (103)	ALLLLLAAAAAA	1	Pychron Script	1	Fusions CO2	4	4	0	4	0	30	30	170			0	-0.0306416
	09	4	28.3893	-0.0066986	0.0738	0.996655	-	99.9208	421.779	0.479559								61748-09	CM-SS4B	37	2013-08-20	9.26667	3459835000		Sanidine	29	Iain Mason	Cuba Mesa	129.138.12.160	7.875	H2 Baseline = A @ 8/21/13 9:26 AM @ argonlab; H1 Baseline = A @ 8/21/13 9:26 AM @ argonlab; AX Baseline = A @ 8/21/13 9:26 AM @ argonlab; L1 Baseline = A @ 8/21/13 9:26 AM @ argonlab; L2 Baseline = A @ 8/21/13 9:26 AM @ argonlab; CDD Baseline = A @ 8/21/13 9:26 AM @ argonlab; Ar41 = A @ 8/21/13 9:26 AM @ argonlab; Ar40 = P @ 8/21/13 9:26 AM @ argonlab; Ar39 = P @ 8/21/13 9:26 AM @ argonlab; Ar38 …	Hole 29 (103)	ALLLLLAAAAAA	1	Pychron Script	1	Fusions CO2	4	4	0	4	0	30	30	123			0	0.0421
	29	4	32.4011	0.0173937	0.0789	0.73988	29.3327	99.9313	474.319	0.911569								61748-29	CM-SS4B	37	2013-08-20	12.6667	3459847000		Sanidine	29	Iain Mason	Cuba Mesa	129.138.12.160	7.875	H2 Baseline = A @ 8/21/13 9:26 AM @ argonlab; H1 Baseline = A @ 8/21/13 9:26 AM @ argonlab; AX Baseline = A @ 8/21/13 9:26 AM @ argonlab; L1 Baseline = A @ 8/21/13 9:26 AM @ argonlab; L2 Baseline = A @ 8/21/13 9:26 AM @ argonlab; CDD Baseline = A @ 8/21/13 9:26 AM @ argonlab; Ar41 = A @ 8/21/13 9:26 AM @ argonlab; Ar40 = P @ 8/21/13 9:26 AM @ argonlab; Ar39 = P @ 8/21/13 9:26 AM @ argonlab; Ar38 …	Hole 29 (103)	ALLLLLAAAAAA	1	Pychron Script	1	Fusions CO2	4	4	0	4	0	30	30	143			0	-0.0291174
	70	4	33.0435	0.0456409	0.1382	0.191123	11.1787	99.8889	482.414	2.69432								61748-70	CM-SS4B	37	2013-08-20	19.8167	3459873000		Sanidine	29	Iain Mason	Cuba Mesa	129.138.12.160	7.875	H2 Baseline = A @ 8/21/13 9:26 AM @ argonlab; H1 Baseline = A @ 8/21/13 9:26 AM @ argonlab; AX Baseline = A @ 8/21/13 9:26 AM @ argonlab; L1 Baseline = A @ 8/21/13 9:26 AM @ argonlab; L2 Baseline = A @ 8/21/13 9:26 AM @ argonlab; CDD Baseline = A @ 8/21/13 9:26 AM @ argonlab; Ar41 = A @ 8/21/13 9:26 AM @ argonlab; Ar40 = P @ 8/21/13 9:26 AM @ argonlab; Ar39 = P @ 8/21/13 9:26 AM @ argonlab; Ar38 …	Hole 29 (103)	ALLLLLAAAAAA	1	Pychron Script	1	Fusions CO2	4	4	0	4	0	30	30	184			0	-0.029261
	02	4	39.0225	0.0101148	0.0977	1.07949	50.4413	99.928	557.777	0.696346								61748-02	CM-SS4B	37	2013-08-20	7.93333	3459830000		Sanidine	29	Iain Mason	Cuba Mesa	129.138.12.160	7.875	H2 Baseline = A @ 8/21/13 9:25 AM @ argonlab; H1 Baseline = A @ 8/21/13 9:25 AM @ argonlab; AX Baseline = A @ 8/21/13 9:25 AM @ argonlab; L1 Baseline = A @ 8/21/13 9:25 AM @ argonlab; L2 Baseline = A @ 8/21/13 9:25 AM @ argonlab; CDD Baseline = A @ 8/21/13 9:25 AM @ argonlab; Ar41 = A @ 8/21/13 9:25 AM @ argonlab; Ar40 = P @ 8/21/13 9:25 AM @ argonlab; Ar39 = P @ 8/21/13 9:25 AM @ argonlab; Ar38 …	Hole 29 (103)	ALLLLLAAAAAA	1	Pychron Script	1	Fusions CO2	4	4	0	4	0	30	30	116			0	0.0341003
	13	4	40.9946	-0.0038731	0.0866	0.357439	-	99.9371	581.963	2.03747								61748-13	CM-SS4B	37	2013-08-20	9.9	3459837000		Sanidine	29	Iain Mason	Cuba Mesa	129.138.12.160	7.875	H2 Baseline = A @ 8/21/13 9:26 AM @ argonlab; H1 Baseline = A @ 8/21/13 9:26 AM @ argonlab; AX Baseline = A @ 8/21/13 9:26 AM @ argonlab; L1 Baseline = A @ 8/21/13 9:26 AM @ argonlab; L2 Baseline = A @ 8/21/13 9:26 AM @ argonlab; CDD Baseline = A @ 8/21/13 9:26 AM @ argonlab; Ar41 = A @ 8/21/13 9:26 AM @ argonlab; Ar40 = P @ 8/21/13 9:26 AM @ argonlab; Ar39 = P @ 8/21/13 9:26 AM @ argonlab; Ar38 …	Hole 29 (103)	ALLLLLAAAAAA	1	Pychron Script	1	Fusions CO2	4	4	0	4	0	30	30	127			0	0.004725
	05	4	42.3041	0.0050887	0.0417	0.849156	100.262	99.972	598.002	1.17765								61748-05	CM-SS4B	37	2013-08-20	8.46667	3459832000		Sanidine	29	Iain Mason	Cuba Mesa	129.138.12.160	7.875	H2 Baseline = A @ 8/21/13 9:26 AM @ argonlab; H1 Baseline = A @ 8/21/13 9:26 AM @ argonlab; AX Baseline = A @ 8/21/13 9:26 AM @ argonlab; L1 Baseline = A @ 8/21/13 9:26 AM @ argonlab; L2 Baseline = A @ 8/21/13 9:26 AM @ argonlab; CDD Baseline = A @ 8/21/13 9:26 AM @ argonlab; Ar41 = A @ 8/21/13 9:26 AM @ argonlab; Ar40 = P @ 8/21/13 9:26 AM @ argonlab; Ar39 = P @ 8/21/13 9:26 AM @ argonlab; Ar38 …	Hole 29 (103)	ALLLLLAAAAAA	1	Pychron Script	1	Fusions CO2	4	4	0	4	0	30	30	119			0	-0.0165372
	48	4	42.5799	-0.0079454	0.0147	0.188247	-	99.988	601.403	3.7046								61748-48	CM-SS4B	37	2013-08-20	15.9833	3459859000		Sanidine	29	Iain Mason	Cuba Mesa	129.138.12.160	7.875	H2 Baseline = A @ 8/21/13 9:26 AM @ argonlab; H1 Baseline = A @ 8/21/13 9:26 AM @ argonlab; AX Baseline = A @ 8/21/13 9:26 AM @ argonlab; L1 Baseline = A @ 8/21/13 9:26 AM @ argonlab; L2 Baseline = A @ 8/21/13 9:26 AM @ argonlab; CDD Baseline = A @ 8/21/13 9:26 AM @ argonlab; Ar41 = A @ 8/21/13 9:26 AM @ argonlab; Ar40 = P @ 8/21/13 9:26 AM @ argonlab; Ar39 = P @ 8/21/13 9:26 AM @ argonlab; Ar38 …	Hole 29 (103)	ALLLLLAAAAAA	1	Pychron Script	1	Fusions CO2	4	4	0	4	0	30	30	162			0	-0.0301
	22	4	45.5385	0.0349252	0.0989	0.500091	14.6085	99.9414	636.448	1.30334								61748-22	CM-SS4B	37	2013-08-20	11.5	3459843000		Sanidine	29	Iain Mason	Cuba Mesa	129.138.12.160	7.875	H2 Baseline = A @ 8/21/13 9:26 AM @ argonlab; H1 Baseline = A @ 8/21/13 9:26 AM @ argonlab; AX Baseline = A @ 8/21/13 9:26 AM @ argonlab; L1 Baseline = A @ 8/21/13 9:26 AM @ argonlab; L2 Baseline = A @ 8/21/13 9:26 AM @ argonlab; CDD Baseline = A @ 8/21/13 9:26 AM @ argonlab; Ar41 = A @ 8/21/13 9:26 AM @ argonlab; Ar40 = P @ 8/21/13 9:26 AM @ argonlab; Ar39 = P @ 8/21/13 9:26 AM @ argonlab; Ar38 …	Hole 29 (103)	ALLLLLAAAAAA	1	Pychron Script	1	Fusions CO2	4	4	0	4	0	30	30	136			0	0.0215333
	107	4	46.0636	-0.013279	-0.0499	0.32482	-	100.03	643.103	2.68678								61748-107	CM-SS4B	37	2013-08-21	1.85	3459895000		Sanidine	29	Iain Mason	Cuba Mesa	129.138.12.160	7.875	H2 Baseline = A @ 8/21/13 9:26 AM @ argonlab; H1 Baseline = A @ 8/21/13 9:26 AM @ argonlab; AX Baseline = A @ 8/21/13 9:26 AM @ argonlab; L1 Baseline = A @ 8/21/13 9:26 AM @ argonlab; L2 Baseline = A @ 8/21/13 9:26 AM @ argonlab; CDD Baseline = A @ 8/21/13 9:26 AM @ argonlab; Ar41 = A @ 8/21/13 9:26 AM @ argonlab; Ar40 = P @ 8/21/13 9:26 AM @ argonlab; Ar39 = P @ 8/21/13 9:26 AM @ argonlab; Ar38 …	Hole 29 (103)	ALLLLLAAAAAA	1	Pychron Script	1	Fusions CO2	4	4	0	4	0	30	30	221			0	-0.0239166
	18	4	46.1959	0.015749	0.062	0.362818	32.396	99.962	644.299	1.81404								61748-18	CM-SS4B	37	2013-08-20	10.6333	3459840000		Sanidine	29	Iain Mason	Cuba Mesa	129.138.12.160	7.875	H2 Baseline = A @ 8/21/13 9:26 AM @ argonlab; H1 Baseline = A @ 8/21/13 9:26 AM @ argonlab; AX Baseline = A @ 8/21/13 9:26 AM @ argonlab; L1 Baseline = A @ 8/21/13 9:26 AM @ argonlab; L2 Baseline = A @ 8/21/13 9:26 AM @ argonlab; CDD Baseline = A @ 8/21/13 9:26 AM @ argonlab; Ar41 = A @ 8/21/13 9:26 AM @ argonlab; Ar40 = P @ 8/21/13 9:26 AM @ argonlab; Ar39 = P @ 8/21/13 9:26 AM @ argonlab; Ar38 …	Hole 29 (103)	ALLLLLAAAAAA	1	Pychron Script	1	Fusions CO2	4	4	0	4	0	30	30	132			0	-0.015375
	69	4	48.2766	-0.0371984	0.1167	0.517758	-	99.9215	668.357	1.4184								61748-69	CM-SS4B	37	2013-08-20	19.7	3459873000		Sanidine	29	Iain Mason	Cuba Mesa	129.138.12.160	7.875	H2 Baseline = A @ 8/21/13 9:26 AM @ argonlab; H1 Baseline = A @ 8/21/13 9:26 AM @ argonlab; AX Baseline = A @ 8/21/13 9:26 AM @ argonlab; L1 Baseline = A @ 8/21/13 9:26 AM @ argonlab; L2 Baseline = A @ 8/21/13 9:26 AM @ argonlab; CDD Baseline = A @ 8/21/13 9:26 AM @ argonlab; Ar41 = A @ 8/21/13 9:26 AM @ argonlab; Ar40 = P @ 8/21/13 9:26 AM @ argonlab; Ar39 = P @ 8/21/13 9:26 AM @ argonlab; Ar38 …	Hole 29 (103)	ALLLLLAAAAAA	1	Pychron Script	1	Fusions CO2	4	4	0	4	0	30	30	183			0	0.024539
	67	4	49.7992	-0.0019167	-0.0112	0.236515	-	100.006	686.432	2.93097								61748-67	CM-SS4B	37	2013-08-20	19.0667	3459870000		Sanidine	29	Iain Mason	Cuba Mesa	129.138.12.160	7.875	H2 Baseline = A @ 8/21/13 9:26 AM @ argonlab; H1 Baseline = A @ 8/21/13 9:26 AM @ argonlab; AX Baseline = A @ 8/21/13 9:26 AM @ argonlab; L1 Baseline = A @ 8/21/13 9:26 AM @ argonlab; L2 Baseline = A @ 8/21/13 9:26 AM @ argonlab; CDD Baseline = A @ 8/21/13 9:26 AM @ argonlab; Ar41 = A @ 8/21/13 9:26 AM @ argonlab; Ar40 = P @ 8/21/13 9:26 AM @ argonlab; Ar39 = P @ 8/21/13 9:26 AM @ argonlab; Ar38 …	Hole 29 (103)	ALLLLLAAAAAA	1	Pychron Script	1	Fusions CO2	4	4	0	4	0	30	30	181			0	0.0108585
	92	4	50.3976	0.0124725	0.1164	1.01872	40.9063	99.9334	692.885	0.968952								61748-92	CM-SS4B	37	2013-08-20	23.6333	3459887000		Sanidine	29	Iain Mason	Cuba Mesa	129.138.12.160	7.875	H2 Baseline = A @ 8/21/13 9:26 AM @ argonlab; H1 Baseline = A @ 8/21/13 9:26 AM @ argonlab; AX Baseline = A @ 8/21/13 9:26 AM @ argonlab; L1 Baseline = A @ 8/21/13 9:26 AM @ argonlab; L2 Baseline = A @ 8/21/13 9:26 AM @ argonlab; CDD Baseline = A @ 8/21/13 9:26 AM @ argonlab; Ar41 = A @ 8/21/13 9:26 AM @ argonlab; Ar40 = P @ 8/21/13 9:26 AM @ argonlab; Ar39 = P @ 8/21/13 9:26 AM @ argonlab; Ar38 …	Hole 29 (103)	ALLLLLAAAAAA	1	Pychron Script	1	Fusions CO2	4	4	0	4	0	30	30	206			0	-0.0052245
	101	4	50.4636	0.0211079	0.2892	0.765464	24.1712	99.8324	693.06	1.06437								61748-101	CM-SS4B	37	2013-08-21	1.21667	3459892000		Sanidine	29	Iain Mason	Cuba Mesa	129.138.12.160	7.875	H2 Baseline = A @ 8/21/13 9:26 AM @ argonlab; H1 Baseline = A @ 8/21/13 9:26 AM @ argonlab; AX Baseline = A @ 8/21/13 9:26 AM @ argonlab; L1 Baseline = A @ 8/21/13 9:26 AM @ argonlab; L2 Baseline = A @ 8/21/13 9:26 AM @ argonlab; CDD Baseline = A @ 8/21/13 9:26 AM @ argonlab; Ar41 = A @ 8/21/13 9:26 AM @ argonlab; Ar40 = P @ 8/21/13 9:26 AM @ argonlab; Ar39 = P @ 8/21/13 9:26 AM @ argonlab; Ar38 …	Hole 29 (103)	ALLLLLAAAAAA	1	Pychron Script	1	Fusions CO2	4	4	0	4	0	30	30	215			0	0.0450834
	82	4	51.3217	0.0570492	0.0674	0.417771	8.94323	99.9701	703.664	1.90339								61748-82	CM-SS4B	37	2013-08-20	21.7167	3459880000		Sanidine	29	Iain Mason	Cuba Mesa	129.138.12.160	7.875	H2 Baseline = A @ 8/21/13 9:26 AM @ argonlab; H1 Baseline = A @ 8/21/13 9:26 AM @ argonlab; AX Baseline = A @ 8/21/13 9:26 AM @ argonlab; L1 Baseline = A @ 8/21/13 9:26 AM @ argonlab; L2 Baseline = A @ 8/21/13 9:26 AM @ argonlab; CDD Baseline = A @ 8/21/13 9:26 AM @ argonlab; Ar41 = A @ 8/21/13 9:26 AM @ argonlab; Ar40 = P @ 8/21/13 9:26 AM @ argonlab; Ar39 = P @ 8/21/13 9:26 AM @ argonlab; Ar38 …	Hole 29 (103)	ALLLLLAAAAAA	1	Pychron Script	1	Fusions CO2	4	4	0	4	0	30	30	196			0	0.0319152
	59	4	51.7269	0.0225576	0.2288	0.833892	22.6178	99.8714	707.678	0.889702								61748-59	CM-SS4B	37	2013-08-20	17.7833	3459866000		Sanidine	29	Iain Mason	Cuba Mesa	129.138.12.160	7.875	H2 Baseline = A @ 8/21/13 9:26 AM @ argonlab; H1 Baseline = A @ 8/21/13 9:26 AM @ argonlab; AX Baseline = A @ 8/21/13 9:26 AM @ argonlab; L1 Baseline = A @ 8/21/13 9:26 AM @ argonlab; L2 Baseline = A @ 8/21/13 9:26 AM @ argonlab; CDD Baseline = A @ 8/21/13 9:26 AM @ argonlab; Ar41 = A @ 8/21/13 9:26 AM @ argonlab; Ar40 = P @ 8/21/13 9:26 AM @ argonlab; Ar39 = P @ 8/21/13 9:26 AM @ argonlab; Ar38 …	Hole 29 (103)	ALLLLLAAAAAA	1	Pychron Script	1	Fusions CO2	4	4	0	4	0	30	30	173			0	0.0032584
	53	4	52.4386	-0.0121434	0.0495	0.450072	-	99.9696	716.307	1.7258								61748-53	CM-SS4B	37	2013-08-20	16.95	3459863000		Sanidine	29	Iain Mason	Cuba Mesa	129.138.12.160	7.875	H2 Baseline = A @ 8/21/13 9:26 AM @ argonlab; H1 Baseline = A @ 8/21/13 9:26 AM @ argonlab; AX Baseline = A @ 8/21/13 9:26 AM @ argonlab; L1 Baseline = A @ 8/21/13 9:26 AM @ argonlab; L2 Baseline = A @ 8/21/13 9:26 AM @ argonlab; CDD Baseline = A @ 8/21/13 9:26 AM @ argonlab; Ar41 = A @ 8/21/13 9:26 AM @ argonlab; Ar40 = P @ 8/21/13 9:26 AM @ argonlab; Ar39 = P @ 8/21/13 9:26 AM @ argonlab; Ar38 …	Hole 29 (103)	ALLLLLAAAAAA	1	Pychron Script	1	Fusions CO2	4	4	0	4	0	30	30	167			0	-0.0076416
	23	4	55.394	-0.0117469	0.2474	0.457316	-	99.8654	748.778	1.82883								61748-23	CM-SS4B	37	2013-08-20	11.6	3459843000		Sanidine	29	Iain Mason	Cuba Mesa	129.138.12.160	7.875	H2 Baseline = A @ 8/21/13 9:26 AM @ argonlab; H1 Baseline = A @ 8/21/13 9:26 AM @ argonlab; AX Baseline = A @ 8/21/13 9:26 AM @ argonlab; L1 Baseline = A @ 8/21/13 9:26 AM @ argonlab; L2 Baseline = A @ 8/21/13 9:26 AM @ argonlab; CDD Baseline = A @ 8/21/13 9:26 AM @ argonlab; Ar41 = A @ 8/21/13 9:26 AM @ argonlab; Ar40 = P @ 8/21/13 9:26 AM @ argonlab; Ar39 = P @ 8/21/13 9:26 AM @ argonlab; Ar38 …	Hole 29 (103)	ALLLLLAAAAAA	1	Pychron Script	1	Fusions CO2	4	4	0	4	0	30	30	137			0	0.0186333
	62	4	57.7438	0.0120984	0.0956	1.46909	42.1712	99.9525	775.226	0.843239								61748-62	CM-SS4B	37	2013-08-20	18.3333	3459868000		Sanidine	29	Iain Mason	Cuba Mesa	129.138.12.160	7.875	H2 Baseline = A @ 8/21/13 9:26 AM @ argonlab; H1 Baseline = A @ 8/21/13 9:26 AM @ argonlab; AX Baseline = A @ 8/21/13 9:26 AM @ argonlab; L1 Baseline = A @ 8/21/13 9:26 AM @ argonlab; L2 Baseline = A @ 8/21/13 9:26 AM @ argonlab; CDD Baseline = A @ 8/21/13 9:26 AM @ argonlab; Ar41 = A @ 8/21/13 9:26 AM @ argonlab; Ar40 = P @ 8/21/13 9:26 AM @ argonlab; Ar39 = P @ 8/21/13 9:26 AM @ argonlab; Ar38 …	Hole 29 (103)	ALLLLLAAAAAA	1	Pychron Script	1	Fusions CO2	4	4	0	4	0	30	30	176			0	-0.0184315
	65	4	57.7792	-0.0087168	0.0337	0.25599	-	99.9813	775.788	3.11342								61748-65	CM-SS4B	37	2013-08-20	18.85	3459869000		Sanidine	29	Iain Mason	Cuba Mesa	129.138.12.160	7.875	H2 Baseline = A @ 8/21/13 9:26 AM @ argonlab; H1 Baseline = A @ 8/21/13 9:26 AM @ argonlab; AX Baseline = A @ 8/21/13 9:26 AM @ argonlab; L1 Baseline = A @ 8/21/13 9:26 AM @ argonlab; L2 Baseline = A @ 8/21/13 9:26 AM @ argonlab; CDD Baseline = A @ 8/21/13 9:26 AM @ argonlab; Ar41 = A @ 8/21/13 9:26 AM @ argonlab; Ar40 = P @ 8/21/13 9:26 AM @ argonlab; Ar39 = P @ 8/21/13 9:26 AM @ argonlab; Ar38 …	Hole 29 (103)	ALLLLLAAAAAA	1	Pychron Script	1	Fusions CO2	4	4	0	4	0	30	30	179			0	0.0215285
	84	4	58.0729	0.0252508	0.041	0.872239	20.2055	99.9826	779.022	1.09856								61748-84	CM-SS4B	37	2013-08-20	22.15	3459881000		Sanidine	29	Iain Mason	Cuba Mesa	129.138.12.160	7.875	H2 Baseline = A @ 8/21/13 9:26 AM @ argonlab; H1 Baseline = A @ 8/21/13 9:26 AM @ argonlab; AX Baseline = A @ 8/21/13 9:26 AM @ argonlab; L1 Baseline = A @ 8/21/13 9:26 AM @ argonlab; L2 Baseline = A @ 8/21/13 9:26 AM @ argonlab; CDD Baseline = A @ 8/21/13 9:26 AM @ argonlab; Ar41 = A @ 8/21/13 9:26 AM @ argonlab; Ar40 = P @ 8/21/13 9:26 AM @ argonlab; Ar39 = P @ 8/21/13 9:26 AM @ argonlab; Ar38 …	Hole 29 (103)	ALLLLLAAAAAA	1	Pychron Script	1	Fusions CO2	4	4	0	4	0	30	30	198			0	0.0719807
	72	4	58.2424	0.0538129	0.1511	0.608297	9.48107	99.9301	780.55	1.73299								61748-72	CM-SS4B	37	2013-08-20	20.0167	3459874000		Sanidine	29	Iain Mason	Cuba Mesa	129.138.12.160	7.875	H2 Baseline = A @ 8/21/13 9:26 AM @ argonlab; H1 Baseline = A @ 8/21/13 9:26 AM @ argonlab; AX Baseline = A @ 8/21/13 9:26 AM @ argonlab; L1 Baseline = A @ 8/21/13 9:26 AM @ argonlab; L2 Baseline = A @ 8/21/13 9:26 AM @ argonlab; CDD Baseline = A @ 8/21/13 9:26 AM @ argonlab; Ar41 = A @ 8/21/13 9:26 AM @ argonlab; Ar40 = P @ 8/21/13 9:26 AM @ argonlab; Ar39 = P @ 8/21/13 9:26 AM @ argonlab; Ar38 …	Hole 29 (103)	ALLLLLAAAAAA	1	Pychron Script	1	Fusions CO2	4	4	0	4	0	30	30	186			0	0.008539
	89	4	59.5266	0.0637355	0.0729	0.323317	8.00502	99.971	794.778	2.90991								61748-89	CM-SS4B	37	2013-08-20	23.1	3459885000		Sanidine	29	Iain Mason	Cuba Mesa	129.138.12.160	7.875	H2 Baseline = A @ 8/21/13 9:26 AM @ argonlab; H1 Baseline = A @ 8/21/13 9:26 AM @ argonlab; AX Baseline = A @ 8/21/13 9:26 AM @ argonlab; L1 Baseline = A @ 8/21/13 9:26 AM @ argonlab; L2 Baseline = A @ 8/21/13 9:26 AM @ argonlab; CDD Baseline = A @ 8/21/13 9:26 AM @ argonlab; Ar41 = A @ 8/21/13 9:26 AM @ argonlab; Ar40 = P @ 8/21/13 9:26 AM @ argonlab; Ar39 = P @ 8/21/13 9:26 AM @ argonlab; Ar38 …	Hole 29 (103)	ALLLLLAAAAAA	1	Pychron Script	1	Fusions CO2	4	4	0	4	0	30	30	203			0	0.0340807
	28	4	59.7474	-0.0304316	0.0455	0.221123	-	99.9719	797.135	4.55457								61748-28	CM-SS4B	37	2013-08-20	12.5667	3459847000		Sanidine	29	Iain Mason	Cuba Mesa	129.138.12.160	7.875	H2 Baseline = A @ 8/21/13 9:26 AM @ argonlab; H1 Baseline = A @ 8/21/13 9:26 AM @ argonlab; AX Baseline = A @ 8/21/13 9:26 AM @ argonlab; L1 Baseline = A @ 8/21/13 9:26 AM @ argonlab; L2 Baseline = A @ 8/21/13 9:26 AM @ argonlab; CDD Baseline = A @ 8/21/13 9:26 AM @ argonlab; Ar41 = A @ 8/21/13 9:26 AM @ argonlab; Ar40 = P @ 8/21/13 9:26 AM @ argonlab; Ar39 = P @ 8/21/13 9:26 AM @ argonlab; Ar38 …	Hole 29 (103)	ALLLLLAAAAAA	1	Pychron Script	1	Fusions CO2	4	4	0	4	0	30	30	142			0	-0.0232174
	25	4	60.1901	0.000477	0.2716	0.726709	1069.61	99.8653	801.239	1.34855								61748-25	CM-SS4B	37	2013-08-20	11.8167	3459844000		Sanidine	29	Iain Mason	Cuba Mesa	129.138.12.160	7.875	H2 Baseline = A @ 8/21/13 9:26 AM @ argonlab; H1 Baseline = A @ 8/21/13 9:26 AM @ argonlab; AX Baseline = A @ 8/21/13 9:26 AM @ argonlab; L1 Baseline = A @ 8/21/13 9:26 AM @ argonlab; L2 Baseline = A @ 8/21/13 9:26 AM @ argonlab; CDD Baseline = A @ 8/21/13 9:26 AM @ argonlab; Ar41 = A @ 8/21/13 9:26 AM @ argonlab; Ar40 = P @ 8/21/13 9:26 AM @ argonlab; Ar39 = P @ 8/21/13 9:26 AM @ argonlab; Ar38 …	Hole 29 (103)	ALLLLLAAAAAA	1	Pychron Script	1	Fusions CO2	4	4	0	4	0	30	30	139			0	0.0131333
	88	4	61.8753	0.0289499	0.0948	0.603004	17.6237	99.9584	819.947	1.65434								61748-88	CM-SS4B	37	2013-08-20	22.9833	3459884000		Sanidine	29	Iain Mason	Cuba Mesa	129.138.12.160	7.875	H2 Baseline = A @ 8/21/13 9:26 AM @ argonlab; H1 Baseline = A @ 8/21/13 9:26 AM @ argonlab; AX Baseline = A @ 8/21/13 9:26 AM @ argonlab; L1 Baseline = A @ 8/21/13 9:26 AM @ argonlab; L2 Baseline = A @ 8/21/13 9:26 AM @ argonlab; CDD Baseline = A @ 8/21/13 9:26 AM @ argonlab; Ar41 = A @ 8/21/13 9:26 AM @ argonlab; Ar40 = P @ 8/21/13 9:26 AM @ argonlab; Ar39 = P @ 8/21/13 9:26 AM @ argonlab; Ar38 …	Hole 29 (103)	ALLLLLAAAAAA	1	Pychron Script	1	Fusions CO2	4	4	0	4	0	30	30	202			0	0.0356807
	35	4	62.8809	0.0085723	0.0369	0.903002	59.5177	99.9837	830.817	1.26451								61748-35	CM-SS4B	37	2013-08-20	13.5	3459850000		Sanidine	29	Iain Mason	Cuba Mesa	129.138.12.160	7.875	H2 Baseline = A @ 8/21/13 9:26 AM @ argonlab; H1 Baseline = A @ 8/21/13 9:26 AM @ argonlab; AX Baseline = A @ 8/21/13 9:26 AM @ argonlab; L1 Baseline = A @ 8/21/13 9:26 AM @ argonlab; L2 Baseline = A @ 8/21/13 9:26 AM @ argonlab; CDD Baseline = A @ 8/21/13 9:26 AM @ argonlab; Ar41 = A @ 8/21/13 9:26 AM @ argonlab; Ar40 = P @ 8/21/13 9:26 AM @ argonlab; Ar39 = P @ 8/21/13 9:26 AM @ argonlab; Ar38 …	Hole 29 (103)	ALLLLLAAAAAA	1	Pychron Script	1	Fusions CO2	4	4	0	4	0	30	30	149			0	0.0170826
	14	4	69.1702	0.0003571	0.0768	0.6784	1428.74	99.9671	896.311	1.57604								61748-14	CM-SS4B	37	2013-08-20	10.0167	3459838000		Sanidine	29	Iain Mason	Cuba Mesa	129.138.12.160	7.875	H2 Baseline = A @ 8/21/13 9:26 AM @ argonlab; H1 Baseline = A @ 8/21/13 9:26 AM @ argonlab; AX Baseline = A @ 8/21/13 9:26 AM @ argonlab; L1 Baseline = A @ 8/21/13 9:26 AM @ argonlab; L2 Baseline = A @ 8/21/13 9:26 AM @ argonlab; CDD Baseline = A @ 8/21/13 9:26 AM @ argonlab; Ar41 = A @ 8/21/13 9:26 AM @ argonlab; Ar40 = P @ 8/21/13 9:26 AM @ argonlab; Ar39 = P @ 8/21/13 9:26 AM @ argonlab; Ar38 …	Hole 29 (103)	ALLLLLAAAAAA	1	Pychron Script	1	Fusions CO2	4	4	0	4	0	30	30	128			0	-0.024075
	64	4	69.5394	0.0370574	0.0333	0.399819	13.7679	99.9898	900.268	2.50575								61748-64	CM-SS4B	37	2013-08-20	18.75	3459869000		Sanidine	29	Iain Mason	Cuba Mesa	129.138.12.160	7.875	H2 Baseline = A @ 8/21/13 9:26 AM @ argonlab; H1 Baseline = A @ 8/21/13 9:26 AM @ argonlab; AX Baseline = A @ 8/21/13 9:26 AM @ argonlab; L1 Baseline = A @ 8/21/13 9:26 AM @ argonlab; L2 Baseline = A @ 8/21/13 9:26 AM @ argonlab; CDD Baseline = A @ 8/21/13 9:26 AM @ argonlab; Ar41 = A @ 8/21/13 9:26 AM @ argonlab; Ar40 = P @ 8/21/13 9:26 AM @ argonlab; Ar39 = P @ 8/21/13 9:26 AM @ argonlab; Ar38 …	Hole 29 (103)	ALLLLLAAAAAA	1	Pychron Script	1	Fusions CO2	4	4	0	4	0	30	30	178			0	0.0251585
	39	4	71.3216	-0.0207603	0.2352	0.480225	-	99.8994	917.725	1.96858								61748-39	CM-SS4B	37	2013-08-20	14.35	3459853000		Sanidine	29	Iain Mason	Cuba Mesa	129.138.12.160	7.875	H2 Baseline = A @ 8/21/13 9:26 AM @ argonlab; H1 Baseline = A @ 8/21/13 9:26 AM @ argonlab; AX Baseline = A @ 8/21/13 9:26 AM @ argonlab; L1 Baseline = A @ 8/21/13 9:26 AM @ argonlab; L2 Baseline = A @ 8/21/13 9:26 AM @ argonlab; CDD Baseline = A @ 8/21/13 9:26 AM @ argonlab; Ar41 = A @ 8/21/13 9:26 AM @ argonlab; Ar40 = P @ 8/21/13 9:26 AM @ argonlab; Ar39 = P @ 8/21/13 9:26 AM @ argonlab; Ar38 …	Hole 29 (103)	ALLLLLAAAAAA	1	Pychron Script	1	Fusions CO2	4	4	0	4	0	30	30	153			0	-0.0021862
	80	4	74.0284	-0.0018773	0.0653	1.09816	-	99.9735	945.474	0.915182								61748-80	CM-SS4B	37	2013-08-20	21.5	3459879000		Sanidine	29	Iain Mason	Cuba Mesa	129.138.12.160	7.875	H2 Baseline = A @ 8/21/13 9:26 AM @ argonlab; H1 Baseline = A @ 8/21/13 9:26 AM @ argonlab; AX Baseline = A @ 8/21/13 9:26 AM @ argonlab; L1 Baseline = A @ 8/21/13 9:26 AM @ argonlab; L2 Baseline = A @ 8/21/13 9:26 AM @ argonlab; CDD Baseline = A @ 8/21/13 9:26 AM @ argonlab; Ar41 = A @ 8/21/13 9:26 AM @ argonlab; Ar40 = P @ 8/21/13 9:26 AM @ argonlab; Ar39 = P @ 8/21/13 9:26 AM @ argonlab; Ar38 …	Hole 29 (103)	ALLLLLAAAAAA	1	Pychron Script	1	Fusions CO2	4	4	0	4	0	30	30	194			0	0.0116152
	49	4	74.2354	-0.0073552	0.0457	0.624297	-	99.9809	947.589	1.84611								61748-49	CM-SS4B	37	2013-08-20	16.1	3459860000		Sanidine	29	Iain Mason	Cuba Mesa	129.138.12.160	7.875	H2 Baseline = A @ 8/21/13 9:26 AM @ argonlab; H1 Baseline = A @ 8/21/13 9:26 AM @ argonlab; AX Baseline = A @ 8/21/13 9:26 AM @ argonlab; L1 Baseline = A @ 8/21/13 9:26 AM @ argonlab; L2 Baseline = A @ 8/21/13 9:26 AM @ argonlab; CDD Baseline = A @ 8/21/13 9:26 AM @ argonlab; Ar41 = A @ 8/21/13 9:26 AM @ argonlab; Ar40 = P @ 8/21/13 9:26 AM @ argonlab; Ar39 = P @ 8/21/13 9:26 AM @ argonlab; Ar38 …	Hole 29 (103)	ALLLLLAAAAAA	1	Pychron Script	1	Fusions CO2	4	4	0	4	0	30	30	163			0	0.0017
	27	4	75.664	-0.0026435	0.0451	0.550838	-	99.982	961.781	1.84602								61748-27	CM-SS4B	37	2013-08-20	12.0167	3459845000		Sanidine	29	Iain Mason	Cuba Mesa	129.138.12.160	7.875	H2 Baseline = A @ 8/21/13 9:26 AM @ argonlab; H1 Baseline = A @ 8/21/13 9:26 AM @ argonlab; AX Baseline = A @ 8/21/13 9:26 AM @ argonlab; L1 Baseline = A @ 8/21/13 9:26 AM @ argonlab; L2 Baseline = A @ 8/21/13 9:26 AM @ argonlab; CDD Baseline = A @ 8/21/13 9:26 AM @ argonlab; Ar41 = A @ 8/21/13 9:26 AM @ argonlab; Ar40 = P @ 8/21/13 9:26 AM @ argonlab; Ar39 = P @ 8/21/13 9:26 AM @ argonlab; Ar38 …	Hole 29 (103)	ALLLLLAAAAAA	1	Pychron Script	1	Fusions CO2	4	4	0	4	0	30	30	141			0	0.0257333
	41	4	75.6982	0.0031931	0.0263	0.554909	159.783	99.9899	962.181	1.83279								61748-41	CM-SS4B	37	2013-08-20	14.5667	3459854000		Sanidine	29	Iain Mason	Cuba Mesa	129.138.12.160	7.875	H2 Baseline = A @ 8/21/13 9:26 AM @ argonlab; H1 Baseline = A @ 8/21/13 9:26 AM @ argonlab; AX Baseline = A @ 8/21/13 9:26 AM @ argonlab; L1 Baseline = A @ 8/21/13 9:26 AM @ argonlab; L2 Baseline = A @ 8/21/13 9:26 AM @ argonlab; CDD Baseline = A @ 8/21/13 9:26 AM @ argonlab; Ar41 = A @ 8/21/13 9:26 AM @ argonlab; Ar40 = P @ 8/21/13 9:26 AM @ argonlab; Ar39 = P @ 8/21/13 9:26 AM @ argonlab; Ar38 …	Hole 29 (103)	ALLLLLAAAAAA	1	Pychron Script	1	Fusions CO2	4	4	0	4	0	30	30	155			0	0.0067138
	50	4	75.8024	-0.0445768	0.1155	0.228676	-	99.9493	962.883	3.9596								61748-50	CM-SS4B	37	2013-08-20	16.2	3459860000		Sanidine	29	Iain Mason	Cuba Mesa	129.138.12.160	7.875	H2 Baseline = A @ 8/21/13 9:26 AM @ argonlab; H1 Baseline = A @ 8/21/13 9:26 AM @ argonlab; AX Baseline = A @ 8/21/13 9:26 AM @ argonlab; L1 Baseline = A @ 8/21/13 9:26 AM @ argonlab; L2 Baseline = A @ 8/21/13 9:26 AM @ argonlab; CDD Baseline = A @ 8/21/13 9:26 AM @ argonlab; Ar41 = A @ 8/21/13 9:26 AM @ argonlab; Ar40 = P @ 8/21/13 9:26 AM @ argonlab; Ar39 = P @ 8/21/13 9:26 AM @ argonlab; Ar38 …	Hole 29 (103)	ALLLLLAAAAAA	1	Pychron Script	1	Fusions CO2	4	4	0	4	0	30	30	164			0	-0.0144
	43	4	81.5321	0.0340446	0.2287	0.295024	14.9863	99.9194	1018.43	3.59706								61748-43	CM-SS4B	37	2013-08-20	14.9833	3459856000		Sanidine	29	Iain Mason	Cuba Mesa	129.138.12.160	7.875	H2 Baseline = A @ 8/21/13 9:26 AM @ argonlab; H1 Baseline = A @ 8/21/13 9:26 AM @ argonlab; AX Baseline = A @ 8/21/13 9:26 AM @ argonlab; L1 Baseline = A @ 8/21/13 9:26 AM @ argonlab; L2 Baseline = A @ 8/21/13 9:26 AM @ argonlab; CDD Baseline = A @ 8/21/13 9:26 AM @ argonlab; Ar41 = A @ 8/21/13 9:26 AM @ argonlab; Ar40 = P @ 8/21/13 9:26 AM @ argonlab; Ar39 = P @ 8/21/13 9:26 AM @ argonlab; Ar38 …	Hole 29 (103)	ALLLLLAAAAAA	1	Pychron Script	1	Fusions CO2	4	4	0	4	0	30	30	157			0	-0.0446862
	01	4	84.1794	0.0089561	0.00867198	0.204461	56.9672	99.9978	1044.24	5.67418								61748-01	CM-SS4B	37	2013-08-20	7.81667	3459830000		Sanidine	29	Iain Mason	Cuba Mesa	129.138.12.160	7.875	H2 Baseline = A @ 8/21/13 9:25 AM @ argonlab; H1 Baseline = A @ 8/21/13 9:25 AM @ argonlab; AX Baseline = A @ 8/21/13 9:25 AM @ argonlab; L1 Baseline = A @ 8/21/13 9:25 AM @ argonlab; L2 Baseline = A @ 8/21/13 9:25 AM @ argonlab; CDD Baseline = A @ 8/21/13 9:25 AM @ argonlab; Ar41 = A @ 8/21/13 9:25 AM @ argonlab; Ar40 = P @ 8/21/13 9:25 AM @ argonlab; Ar39 = P @ 8/21/13 9:25 AM @ argonlab; Ar38 …	Hole 29 (103)	ALLLLLAAAAAA	1	Pychron Script	1	Fusions CO2	4	4	0	4	0	30	30	115			0	0.0514003
	04	4	84.9135	0.0209233	0.0279	0.840876	24.3845	99.9923	1051.12	1.43472								61748-04	CM-SS4B	37	2013-08-20	8.36667	3459832000		Sanidine	29	Iain Mason	Cuba Mesa	129.138.12.160	7.875	H2 Baseline = A @ 8/21/13 9:26 AM @ argonlab; H1 Baseline = A @ 8/21/13 9:26 AM @ argonlab; AX Baseline = A @ 8/21/13 9:26 AM @ argonlab; L1 Baseline = A @ 8/21/13 9:26 AM @ argonlab; L2 Baseline = A @ 8/21/13 9:26 AM @ argonlab; CDD Baseline = A @ 8/21/13 9:26 AM @ argonlab; Ar41 = A @ 8/21/13 9:26 AM @ argonlab; Ar40 = P @ 8/21/13 9:26 AM @ argonlab; Ar39 = P @ 8/21/13 9:26 AM @ argonlab; Ar38 …	Hole 29 (103)	ALLLLLAAAAAA	1	Pychron Script	1	Fusions CO2	4	4	0	4	0	30	30	118			0	0.0189628
	36	4	85.8792	0.0120779	0.1198	0.868191	42.2428	99.9596	1059.93	1.6295								61748-36	CM-SS4B	37	2013-08-20	13.8333	3459851000		Sanidine	29	Iain Mason	Cuba Mesa	129.138.12.160	7.875	H2 Baseline = A @ 8/21/13 9:26 AM @ argonlab; H1 Baseline = A @ 8/21/13 9:26 AM @ argonlab; AX Baseline = A @ 8/21/13 9:26 AM @ argonlab; L1 Baseline = A @ 8/21/13 9:26 AM @ argonlab; L2 Baseline = A @ 8/21/13 9:26 AM @ argonlab; CDD Baseline = A @ 8/21/13 9:26 AM @ argonlab; Ar41 = A @ 8/21/13 9:26 AM @ argonlab; Ar40 = P @ 8/21/13 9:26 AM @ argonlab; Ar39 = P @ 8/21/13 9:26 AM @ argonlab; Ar38 …	Hole 29 (103)	ALLLLLAAAAAA	1	Pychron Script	1	Fusions CO2	4	4	0	4	0	30	30	150			0	0.0098138
	26	4	86.899	-0.0238181	0.2132	0.707382	-	99.9249	1069.16	1.49918								61748-26	CM-SS4B	37	2013-08-20	11.9167	3459845000		Sanidine	29	Iain Mason	Cuba Mesa	129.138.12.160	7.875	H2 Baseline = A @ 8/21/13 9:26 AM @ argonlab; H1 Baseline = A @ 8/21/13 9:26 AM @ argonlab; AX Baseline = A @ 8/21/13 9:26 AM @ argonlab; L1 Baseline = A @ 8/21/13 9:26 AM @ argonlab; L2 Baseline = A @ 8/21/13 9:26 AM @ argonlab; CDD Baseline = A @ 8/21/13 9:26 AM @ argonlab; Ar41 = A @ 8/21/13 9:26 AM @ argonlab; Ar40 = P @ 8/21/13 9:26 AM @ argonlab; Ar39 = P @ 8/21/13 9:26 AM @ argonlab; Ar38 …	Hole 29 (103)	ALLLLLAAAAAA	1	Pychron Script	1	Fusions CO2	4	4	0	4	0	30	30	140			0	0.0526333
	90	4	87.7224	0.0107679	0.1162	1.61175	47.3819	99.9616	1077.14	0.763184								61748-90	CM-SS4B	37	2013-08-20	23.2	3459885000		Sanidine	29	Iain Mason	Cuba Mesa	129.138.12.160	7.875	H2 Baseline = A @ 8/21/13 9:26 AM @ argonlab; H1 Baseline = A @ 8/21/13 9:26 AM @ argonlab; AX Baseline = A @ 8/21/13 9:26 AM @ argonlab; L1 Baseline = A @ 8/21/13 9:26 AM @ argonlab; L2 Baseline = A @ 8/21/13 9:26 AM @ argonlab; CDD Baseline = A @ 8/21/13 9:26 AM @ argonlab; Ar41 = A @ 8/21/13 9:26 AM @ argonlab; Ar40 = P @ 8/21/13 9:26 AM @ argonlab; Ar39 = P @ 8/21/13 9:26 AM @ argonlab; Ar38 …	Hole 29 (103)	ALLLLLAAAAAA	1	Pychron Script	1	Fusions CO2	4	4	0	4	0	30	30	204			0	0.0764807
	94	4	94.3411	-0.0005	0.0447	0.840271	-	99.9857	1137.76	1.52081								61748-94	CM-SS4B	37	2013-08-20	23.85	3459887000		Sanidine	29	Iain Mason	Cuba Mesa	129.138.12.160	7.875	H2 Baseline = A @ 8/21/13 9:26 AM @ argonlab; H1 Baseline = A @ 8/21/13 9:26 AM @ argonlab; AX Baseline = A @ 8/21/13 9:26 AM @ argonlab; L1 Baseline = A @ 8/21/13 9:26 AM @ argonlab; L2 Baseline = A @ 8/21/13 9:26 AM @ argonlab; CDD Baseline = A @ 8/21/13 9:26 AM @ argonlab; Ar41 = A @ 8/21/13 9:26 AM @ argonlab; Ar40 = P @ 8/21/13 9:26 AM @ argonlab; Ar39 = P @ 8/21/13 9:26 AM @ argonlab; Ar38 …	Hole 29 (103)	ALLLLLAAAAAA	1	Pychron Script	1	Fusions CO2	4	4	0	4	0	30	30	208			0	0.0378655
	75	4	97.9377	0.0074768	0.0721	0.579035	68.2383	99.9786	1169.73	2.25104								61748-75	CM-SS4B	37	2013-08-20	20.55	3459876000		Sanidine	29	Iain Mason	Cuba Mesa	129.138.12.160	7.875	H2 Baseline = A @ 8/21/13 9:26 AM @ argonlab; H1 Baseline = A @ 8/21/13 9:26 AM @ argonlab; AX Baseline = A @ 8/21/13 9:26 AM @ argonlab; L1 Baseline = A @ 8/21/13 9:26 AM @ argonlab; L2 Baseline = A @ 8/21/13 9:26 AM @ argonlab; CDD Baseline = A @ 8/21/13 9:26 AM @ argonlab; Ar41 = A @ 8/21/13 9:26 AM @ argonlab; Ar40 = P @ 8/21/13 9:26 AM @ argonlab; Ar39 = P @ 8/21/13 9:26 AM @ argonlab; Ar38 …	Hole 29 (103)	ALLLLLAAAAAA	1	Pychron Script	1	Fusions CO2	4	4	0	4	0	30	30	189			0	0.035239
	30	4	100.503	-0.102691	0.0829	0.253724	-	99.9675	1192.08	4.00232								61748-30	CM-SS4B	37	2013-08-20	12.7667	3459848000		Sanidine	29	Iain Mason	Cuba Mesa	129.138.12.160	7.875	H2 Baseline = A @ 8/21/13 9:26 AM @ argonlab; H1 Baseline = A @ 8/21/13 9:26 AM @ argonlab; AX Baseline = A @ 8/21/13 9:26 AM @ argonlab; L1 Baseline = A @ 8/21/13 9:26 AM @ argonlab; L2 Baseline = A @ 8/21/13 9:26 AM @ argonlab; CDD Baseline = A @ 8/21/13 9:26 AM @ argonlab; Ar41 = A @ 8/21/13 9:26 AM @ argonlab; Ar40 = P @ 8/21/13 9:26 AM @ argonlab; Ar39 = P @ 8/21/13 9:26 AM @ argonlab; Ar38 …	Hole 29 (103)	ALLLLLAAAAAA	1	Pychron Script	1	Fusions CO2	4	4	0	4	0	30	30	144			0	0.0140826
	19	4	105.611	-0.0178548	-0.0248	0.508218	-	100.006	1236.46	2.93191								61748-19	CM-SS4B	37	2013-08-20	10.75	3459840000		Sanidine	29	Iain Mason	Cuba Mesa	129.138.12.160	7.875	H2 Baseline = A @ 8/21/13 9:26 AM @ argonlab; H1 Baseline = A @ 8/21/13 9:26 AM @ argonlab; AX Baseline = A @ 8/21/13 9:26 AM @ argonlab; L1 Baseline = A @ 8/21/13 9:26 AM @ argonlab; L2 Baseline = A @ 8/21/13 9:26 AM @ argonlab; CDD Baseline = A @ 8/21/13 9:26 AM @ argonlab; Ar41 = A @ 8/21/13 9:26 AM @ argonlab; Ar40 = P @ 8/21/13 9:26 AM @ argonlab; Ar39 = P @ 8/21/13 9:26 AM @ argonlab; Ar38 …	Hole 29 (103)	ALLLLLAAAAAA	1	Pychron Script	1	Fusions CO2	4	4	0	4	0	30	30	133			0	-0.063475
	37	4	110.328	0.0435108	0.1514	0.584174	11.7259	99.9623	1275.82	2.44971								61748-37	CM-SS4B	37	2013-08-20	13.9333	3459852000		Sanidine	29	Iain Mason	Cuba Mesa	129.138.12.160	7.875	H2 Baseline = A @ 8/21/13 9:26 AM @ argonlab; H1 Baseline = A @ 8/21/13 9:26 AM @ argonlab; AX Baseline = A @ 8/21/13 9:26 AM @ argonlab; L1 Baseline = A @ 8/21/13 9:26 AM @ argonlab; L2 Baseline = A @ 8/21/13 9:26 AM @ argonlab; CDD Baseline = A @ 8/21/13 9:26 AM @ argonlab; Ar41 = A @ 8/21/13 9:26 AM @ argonlab; Ar40 = P @ 8/21/13 9:26 AM @ argonlab; Ar39 = P @ 8/21/13 9:26 AM @ argonlab; Ar38 …	Hole 29 (103)	ALLLLLAAAAAA	1	Pychron Script	1	Fusions CO2	4	4	0	4	0	30	30	151			0	0.0556138
	99	4	115.635	0.0193699	0.1763	0.417826	26.34	99.9557	1319.41	3.39239								61748-99	CM-SS4B	37	2013-08-21	0.783333	3459891000		Sanidine	29	Iain Mason	Cuba Mesa	129.138.12.160	7.875	H2 Baseline = A @ 8/21/13 9:26 AM @ argonlab; H1 Baseline = A @ 8/21/13 9:26 AM @ argonlab; AX Baseline = A @ 8/21/13 9:26 AM @ argonlab; L1 Baseline = A @ 8/21/13 9:26 AM @ argonlab; L2 Baseline = A @ 8/21/13 9:26 AM @ argonlab; CDD Baseline = A @ 8/21/13 9:26 AM @ argonlab; Ar41 = A @ 8/21/13 9:26 AM @ argonlab; Ar40 = P @ 8/21/13 9:26 AM @ argonlab; Ar39 = P @ 8/21/13 9:26 AM @ argonlab; Ar38 …	Hole 29 (103)	ALLLLLAAAAAA	1	Pychron Script	1	Fusions CO2	4	4	0	4	0	30	30	213			0	0.0787655
	105	4	131.784	-0.0352649	0.1111	0.272422	-	99.9729	1446.36	5.16658								61748-105	CM-SS4B	37	2013-08-21	1.63333	3459894000		Sanidine	29	Iain Mason	Cuba Mesa	129.138.12.160	7.875	H2 Baseline = A @ 8/21/13 9:26 AM @ argonlab; H1 Baseline = A @ 8/21/13 9:26 AM @ argonlab; AX Baseline = A @ 8/21/13 9:26 AM @ argonlab; L1 Baseline = A @ 8/21/13 9:26 AM @ argonlab; L2 Baseline = A @ 8/21/13 9:26 AM @ argonlab; CDD Baseline = A @ 8/21/13 9:26 AM @ argonlab; Ar41 = A @ 8/21/13 9:26 AM @ argonlab; Ar40 = P @ 8/21/13 9:26 AM @ argonlab; Ar39 = P @ 8/21/13 9:26 AM @ argonlab; Ar38 …	Hole 29 (103)	ALLLLLAAAAAA	1	Pychron Script	1	Fusions CO2	4	4	0	4	0	30	30	219			0	0.0579834
	57	4	132.825	0.0299621	-0.0124	1.02391	17.0283	100.005	1454.61	1.5269								61748-57	CM-SS4B	37	2013-08-20	17.3667	3459864000		Sanidine	29	Iain Mason	Cuba Mesa	129.138.12.160	7.875	H2 Baseline = A @ 8/21/13 9:26 AM @ argonlab; H1 Baseline = A @ 8/21/13 9:26 AM @ argonlab; AX Baseline = A @ 8/21/13 9:26 AM @ argonlab; L1 Baseline = A @ 8/21/13 9:26 AM @ argonlab; L2 Baseline = A @ 8/21/13 9:26 AM @ argonlab; CDD Baseline = A @ 8/21/13 9:26 AM @ argonlab; Ar41 = A @ 8/21/13 9:26 AM @ argonlab; Ar40 = P @ 8/21/13 9:26 AM @ argonlab; Ar39 = P @ 8/21/13 9:26 AM @ argonlab; Ar38 …	Hole 29 (103)	ALLLLLAAAAAA	1	Pychron Script	1	Fusions CO2	4	4	0	4	0	30	30	171			0	0.0721084
	66	4	139.982	0.0413404	0.2428	0.187241	12.3415	99.9508	1507.36	8.54099								61748-66	CM-SS4B	37	2013-08-20	18.95	3459870000		Sanidine	29	Iain Mason	Cuba Mesa	129.138.12.160	7.875	H2 Baseline = A @ 8/21/13 9:26 AM @ argonlab; H1 Baseline = A @ 8/21/13 9:26 AM @ argonlab; AX Baseline = A @ 8/21/13 9:26 AM @ argonlab; L1 Baseline = A @ 8/21/13 9:26 AM @ argonlab; L2 Baseline = A @ 8/21/13 9:26 AM @ argonlab; CDD Baseline = A @ 8/21/13 9:26 AM @ argonlab; Ar41 = A @ 8/21/13 9:26 AM @ argonlab; Ar40 = P @ 8/21/13 9:26 AM @ argonlab; Ar39 = P @ 8/21/13 9:26 AM @ argonlab; Ar38 …	Hole 29 (103)	ALLLLLAAAAAA	1	Pychron Script	1	Fusions CO2	4	4	0	4	0	30	30	180			0	0.0121585
	38	4	203.563	0.0305667	0.00552137	0.493158	16.6915	100	1923.52	3.51814								61748-38	CM-SS4B	37	2013-08-20	14.25	3459853000		Sanidine	29	Iain Mason	Cuba Mesa	129.138.12.160	7.875	H2 Baseline = A @ 8/21/13 9:26 AM @ argonlab; H1 Baseline = A @ 8/21/13 9:26 AM @ argonlab; AX Baseline = A @ 8/21/13 9:26 AM @ argonlab; L1 Baseline = A @ 8/21/13 9:26 AM @ argonlab; L2 Baseline = A @ 8/21/13 9:26 AM @ argonlab; CDD Baseline = A @ 8/21/13 9:26 AM @ argonlab; Ar41 = A @ 8/21/13 9:26 AM @ argonlab; Ar40 = P @ 8/21/13 9:26 AM @ argonlab; Ar39 = P @ 8/21/13 9:26 AM @ argonlab; Ar38 …	Hole 29 (103)	ALLLLLAAAAAA	1	Pychron Script	1	Fusions CO2	4	4	0	4	0	30	30	152			0	0.0244138
	CM-SS4, Sanidine, J=0.009546±0.12%, IC=1.058206±0.0009102, NM-254E, Lab#=61414, Argus VI
	72B	3	4.36766	0.0046101	0.025	2.33595	110.671	99.8372	74.5179	0.06733								61414-72B	CM-SS4	35	2012-12-11	1.05	3438033000		Sanidine	5	Iain Mason		129.138.12.160	7.875	H1 Baseline = A @ 12/11/12 1:10 AM @ argus1; AX Baseline = A @ 12/11/12 1:10 AM @ argus1; L1 Baseline = A @ 12/11/12 1:10 AM @ argus1; L2 Baseline = A @ 12/11/12 1:10 AM @ argus1; CDD Baseline = A @ 12/11/12 1:10 AM @ argus1; H2 Baseline = A @ 12/11/12 1:10 AM @ argus1; Ar40 = L @ 12/11/12 1:10 AM @ argus1; Ar39 = L @ 12/11/12 1:10 AM @ argus1; Ar38 = L @ 12/11/12 1:10 AM @ argus1; Ar37 = L @ 12/…		LLLLLLAAAAAA	1	Unknown CO2	1.46234e-23	Pychron CO2	3	3	0	3	0	33	31	206			0	204.053
	29B	3	4.37021	0.0049022	0.0126	17.3998	104.077	99.923	74.6233	0.0132612								61414-29B	CM-SS4	35	2012-12-10	16.15	3438001000		Sanidine	5	Iain Mason		129.138.12.160	7.875	H1 Baseline = A @ 12/10/12 4:16 PM @ argus1; AX Baseline = A @ 12/10/12 4:16 PM @ argus1; L1 Baseline = A @ 12/10/12 4:16 PM @ argus1; L2 Baseline = A @ 12/10/12 4:16 PM @ argus1; CDD Baseline = A @ 12/10/12 4:16 PM @ argus1; H2 Baseline = A @ 12/10/12 4:16 PM @ argus1; Ar40 = L @ 12/10/12 4:16 PM @ argus1; Ar39 = L @ 12/10/12 4:16 PM @ argus1; Ar38 = L @ 12/10/12 4:16 PM @ argus1; Ar37 = L @ 12/…		LLLLLLAAAAAA	1	Unknown CO2	1.45609e-08	Pychron CO2	3	3	0	3	0	33	31	163			0	1520.82
	28B	3	4.37014	0.0040691	0.0104	10.2044	125.385	99.9361	74.6317	0.0189511								61414-28B	CM-SS4	35	2012-12-10	16.0333	3438000000		Sanidine	5	Iain Mason		129.138.12.160	7.875	H1 Baseline = A @ 12/10/12 4:09 PM @ argus1; AX Baseline = A @ 12/10/12 4:09 PM @ argus1; L1 Baseline = A @ 12/10/12 4:09 PM @ argus1; L2 Baseline = A @ 12/10/12 4:09 PM @ argus1; CDD Baseline = A @ 12/10/12 4:09 PM @ argus1; H2 Baseline = A @ 12/10/12 4:09 PM @ argus1; Ar40 = L @ 12/10/12 4:09 PM @ argus1; Ar39 = L @ 12/10/12 4:09 PM @ argus1; Ar38 = L @ 12/10/12 4:09 PM @ argus1; Ar37 = L @ 12/…		LLLLLLAAAAAA	1	Unknown CO2	2.60751e-08	Pychron CO2	3	3	0	3	0	33	31	162			0	891.895
	49B	3	4.3802	0.004137	0.000529222	1.9527	123.327	100.003	74.8493	0.0765478								61414-49B	CM-SS4	35	2012-12-10	20.3	3438015000		Sanidine	5	Iain Mason		129.138.12.160	7.875	H1 Baseline = A @ 12/10/12 8:24 PM @ argus1; AX Baseline = A @ 12/10/12 8:24 PM @ argus1; L1 Baseline = A @ 12/10/12 8:24 PM @ argus1; L2 Baseline = A @ 12/10/12 8:24 PM @ argus1; CDD Baseline = A @ 12/10/12 8:24 PM @ argus1; H2 Baseline = A @ 12/10/12 8:24 PM @ argus1; Ar40 = L @ 12/10/12 8:24 PM @ argus1; Ar39 = L @ 12/10/12 8:24 PM @ argus1; Ar38 = L @ 12/10/12 8:24 PM @ argus1; Ar37 = L @ 12/…		LLLLLLAAAAAA	1	Unknown CO2	1.10579e-15	Pychron CO2	3	3	0	3	0	33	31	183			0	171.065
	30B	3	4.41027	0.0060068	0.0477	2.96539	84.9377	99.6857	75.1196	0.0547335								61414-30B	CM-SS4	35	2012-12-10	16.4833	3438002000		Sanidine	5	Iain Mason		129.138.12.160	7.875	H1 Baseline = A @ 12/10/12 4:36 PM @ argus1; AX Baseline = A @ 12/10/12 4:36 PM @ argus1; L1 Baseline = A @ 12/10/12 4:36 PM @ argus1; L2 Baseline = A @ 12/10/12 4:36 PM @ argus1; CDD Baseline = A @ 12/10/12 4:36 PM @ argus1; H2 Baseline = A @ 12/10/12 4:36 PM @ argus1; Ar40 = L @ 12/10/12 4:36 PM @ argus1; Ar39 = L @ 12/10/12 4:36 PM @ argus1; Ar38 = L @ 12/10/12 4:36 PM @ argus1; Ar37 = L @ 12/…		LLLLLLAAAAAA	1	Unknown CO2	3.84797e-09	Pychron CO2	3	3	0	3	0	33	31	164			0	261.565
	64B	3	4.419	0.0068623	0.00218565	1.23436	74.3488	99.9955	75.4948	0.114222								61414-64B	CM-SS4	35	2012-12-10	23.6333	3438028000		Sanidine	5	Iain Mason		129.138.12.160	7.875	H1 Baseline = A @ 12/10/12 11:46 PM @ argus1; AX Baseline = A @ 12/10/12 11:46 PM @ argus1; L1 Baseline = A @ 12/10/12 11:46 PM @ argus1; L2 Baseline = A @ 12/10/12 11:46 PM @ argus1; CDD Baseline = A @ 12/10/12 11:46 PM @ argus1; H2 Baseline = A @ 12/10/12 11:46 PM @ argus1; Ar40 = L @ 12/10/12 11:46 PM @ argus1; Ar39 = L @ 12/10/12 11:46 PM @ argus1; Ar38 = L @ 12/10/12 11:46 PM @ argus1; Ar37 …		LLLLLLAAAAAA	1	Unknown CO2	5.85186e-21	Pychron CO2	3	3	0	3	0	33	31	198			0	109.093
	75B	3	4.47019	0.0050888	0.002897	2.56531	100.26	99.9888	76.3478	0.0609337								61414-75B	CM-SS4	35	2012-12-11	1.63333	3438035000		Sanidine	5	Iain Mason		129.138.12.160	7.875	H1 Baseline = A @ 12/11/12 1:45 AM @ argus1; AX Baseline = A @ 12/11/12 1:45 AM @ argus1; L1 Baseline = A @ 12/11/12 1:45 AM @ argus1; L2 Baseline = A @ 12/11/12 1:45 AM @ argus1; CDD Baseline = A @ 12/11/12 1:45 AM @ argus1; H2 Baseline = A @ 12/11/12 1:45 AM @ argus1; Ar40 = L @ 12/11/12 1:45 AM @ argus1; Ar39 = L @ 12/11/12 1:45 AM @ argus1; Ar38 = L @ 12/11/12 1:45 AM @ argus1; Ar37 = L @ 12/…		LLLLLLAAAAAA	1	Unknown CO2	1.42201e-24	Pychron CO2	3	3	0	3	0	33	31	209			0	229.35
	50B	3	6.01121	0.0064494	0.0191	4.07784	79.1088	99.9141	101.918	0.0486903								61414-50B	CM-SS4	35	2012-12-10	20.4167	3438016000		Sanidine	5	Iain Mason		129.138.12.160	7.875	H1 Baseline = A @ 12/10/12 8:32 PM @ argus1; AX Baseline = A @ 12/10/12 8:32 PM @ argus1; L1 Baseline = A @ 12/10/12 8:32 PM @ argus1; L2 Baseline = A @ 12/10/12 8:32 PM @ argus1; CDD Baseline = A @ 12/10/12 8:32 PM @ argus1; H2 Baseline = A @ 12/10/12 8:32 PM @ argus1; Ar40 = L @ 12/10/12 8:32 PM @ argus1; Ar39 = L @ 12/10/12 8:32 PM @ argus1; Ar38 = L @ 12/10/12 8:32 PM @ argus1; Ar37 = L @ 12/…		LLLLLLAAAAAA	1	Unknown CO2	6.175e-16	Pychron CO2	3	3	0	3	0	33	31	184			0	490.258
	66B	3	11.8244	0.0002214	0.00108165	3.34233	2304.44	99.9969	195.634	0.0775126								61414-66B	CM-SS4	35	2012-12-10	23.9	3438028000		Sanidine	5	Iain Mason		129.138.12.160	7.875	H1 Baseline = A @ 12/11/12 12:01 AM @ argus1; AX Baseline = A @ 12/11/12 12:01 AM @ argus1; L1 Baseline = A @ 12/11/12 12:01 AM @ argus1; L2 Baseline = A @ 12/11/12 12:01 AM @ argus1; CDD Baseline = A @ 12/11/12 12:01 AM @ argus1; H2 Baseline = A @ 12/11/12 12:01 AM @ argus1; Ar40 = L @ 12/11/12 12:01 AM @ argus1; Ar39 = L @ 12/11/12 12:01 AM @ argus1; Ar38 = L @ 12/11/12 12:01 AM @ argus1; Ar37 …		LLLLLLAAAAAA	1	Unknown CO2	1.82483e-21	Pychron CO2	3	3	0	3	0	33	31	200			0	790.42
	76B	3	64.1737	0.0019478	0.1049	3.35621	261.939	99.9515	874.278	0.264536								61414-76B	CM-SS4	35	2012-12-11	1.75	3438035000		Sanidine	5	Iain Mason		129.138.12.160	7.875	H1 Baseline = A @ 12/11/12 1:52 AM @ argus1; AX Baseline = A @ 12/11/12 1:52 AM @ argus1; L1 Baseline = A @ 12/11/12 1:52 AM @ argus1; L2 Baseline = A @ 12/11/12 1:52 AM @ argus1; CDD Baseline = A @ 12/11/12 1:52 AM @ argus1; H2 Baseline = A @ 12/11/12 1:52 AM @ argus1; Ar40 = L @ 12/11/12 1:52 AM @ argus1; Ar39 = L @ 12/11/12 1:52 AM @ argus1; Ar38 = L @ 12/11/12 1:52 AM @ argus1; Ar37 = L @ 12/…		LLLLLLAAAAAA	1	Unknown CO2	7.94087e-25	Pychron CO2	3	3	0	3	0	33	31	210			0	4307.62
	CM-SS3, Sanidine, J=0.0095261±0.12%, IC=1±0, NM-254E, Lab#=61413, Argus VI
	12	3	3.85347	0.0051026	-0.0115	0.58482	99.989	100.099	65.9198	0.207337								61413-12	CM-SS3	35	2012-12-07	22.9333	3437766000		Sanidine	4	Iain Mason		129.138.12.160	7.875	H1 Baseline = A @ 12/7/12 11:08 PM @ argus1; AX Baseline = A @ 12/7/12 11:08 PM @ argus1; L1 Baseline = A @ 12/7/12 11:08 PM @ argus1; L2 Baseline = A @ 12/7/12 11:08 PM @ argus1; CDD Baseline = A @ 12/7/12 11:08 PM @ argus1; H2 Baseline = A @ 12/7/12 11:08 PM @ argus1; Ar40 = P @ 12/7/12 11:08 PM @ argus1; Ar39 = P @ 12/7/12 11:08 PM @ argus1; Ar38 = L @ 12/7/12 11:08 PM @ argus1; Ar37 = L @ 12/…		PPLLPLAAAAAA	1	Unknown CO2	3.53834e-12	Pychron CO2	3	3	0	3	0	33	31	37			0	45.0719
	14	3	4.12626	0.0041228	0.4587	1.12334	123.752	96.6896	68.1495	0.126496								61413-14	CM-SS3	35	2012-12-07	23.7667	3437769000		Sanidine	4	Iain Mason		129.138.12.160	7.875	H1 Baseline = A @ 12/7/12 11:59 PM @ argus1; AX Baseline = A @ 12/7/12 11:59 PM @ argus1; L1 Baseline = A @ 12/7/12 11:59 PM @ argus1; L2 Baseline = A @ 12/7/12 11:59 PM @ argus1; CDD Baseline = A @ 12/7/12 11:59 PM @ argus1; H2 Baseline = A @ 12/7/12 11:59 PM @ argus1; Ar40 = P @ 12/7/12 11:59 PM @ argus1; Ar39 = P @ 12/7/12 11:59 PM @ argus1; Ar38 = L @ 12/7/12 11:59 PM @ argus1; Ar37 = L @ 12/…		PPLLPLAAAAAA	1	Unknown CO2	2.91588e-13	Pychron CO2	3	3	0	3	0	33	31	39			0	92.7039
	27	3	4.08237	0.0160201	0.00549411	0.184057	31.8477	99.9864	69.693	0.638439								61413-27	CM-SS3	35	2012-12-08	2.71667	3437779000		Sanidine	4	Iain Mason		129.138.12.160	7.875	H1 Baseline = A @ 12/8/12 2:56 AM @ argus1; AX Baseline = A @ 12/8/12 2:56 AM @ argus1; L1 Baseline = A @ 12/8/12 2:56 AM @ argus1; L2 Baseline = A @ 12/8/12 2:56 AM @ argus1; CDD Baseline = A @ 12/8/12 2:56 AM @ argus1; H2 Baseline = A @ 12/8/12 2:56 AM @ argus1; Ar40 = P @ 12/8/12 2:56 AM @ argus1; Ar39 = P @ 12/8/12 2:56 AM @ argus1; Ar38 = L @ 12/8/12 2:56 AM @ argus1; Ar37 = L @ 12/8/12 2:56…		PPLLPLAAAAAA	1	Unknown CO2	1.23387e-17	Pychron CO2	3	3	0	3	0	33	31	52			0	15.028
	07	3	4.48792	0.0460755	1.18	0.0775141	11.0732	92.2527	70.6852	3.86467								61413-07	CM-SS3	35	2012-12-07	22.1833	3437763000		Sanidine	4	Iain Mason		129.138.12.160	7.875	H1 Baseline = A @ 12/7/12 10:18 PM @ argus1; AX Baseline = A @ 12/7/12 10:18 PM @ argus1; L1 Baseline = A @ 12/7/12 10:18 PM @ argus1; L2 Baseline = A @ 12/7/12 10:18 PM @ argus1; CDD Baseline = A @ 12/7/12 10:18 PM @ argus1; H2 Baseline = A @ 12/7/12 10:18 PM @ argus1; Ar40 = P @ 12/7/12 10:18 PM @ argus1; Ar39 = P @ 12/7/12 10:18 PM @ argus1; Ar38 = L @ 12/7/12 10:18 PM @ argus1; Ar37 = L @ 12/…		PPLLPLAAAAAA	1	Unknown CO2	6.51597e-11	Pychron CO2	3	3	0	3	0	33	31	32			0	6.95776
	17	3	4.42098	0.0113214	0.115	0.231487	45.0655	99.2451	74.8197	0.502564								61413-17	CM-SS3	35	2012-12-08	0.3	3437771000		Sanidine	4	Iain Mason		129.138.12.160	7.875	H1 Baseline = A @ 12/8/12 12:31 AM @ argus1; AX Baseline = A @ 12/8/12 12:31 AM @ argus1; L1 Baseline = A @ 12/8/12 12:31 AM @ argus1; L2 Baseline = A @ 12/8/12 12:31 AM @ argus1; CDD Baseline = A @ 12/8/12 12:31 AM @ argus1; H2 Baseline = A @ 12/8/12 12:31 AM @ argus1; Ar40 = P @ 12/8/12 12:31 AM @ argus1; Ar39 = P @ 12/8/12 12:31 AM @ argus1; Ar38 = L @ 12/8/12 12:31 AM @ argus1; Ar37 = L @ 12/…		PPLLPLAAAAAA	1	Unknown CO2	5.07763e-14	Pychron CO2	3	3	0	3	0	33	31	42			0	20.4682
	11	3	4.49245	0.0319075	-0.5586	0.194022	15.9901	103.781	79.4077	2.87595								61413-11	CM-SS3	35	2012-12-07	22.7833	3437765000		Sanidine	4	Iain Mason		129.138.12.160	7.875	H1 Baseline = A @ 12/7/12 10:54 PM @ argus1; AX Baseline = A @ 12/7/12 10:54 PM @ argus1; L1 Baseline = A @ 12/7/12 10:54 PM @ argus1; L2 Baseline = A @ 12/7/12 10:54 PM @ argus1; CDD Baseline = A @ 12/7/12 10:54 PM @ argus1; H2 Baseline = A @ 12/7/12 10:54 PM @ argus1; Ar40 = P @ 12/7/12 10:54 PM @ argus1; Ar39 = P @ 12/7/12 10:54 PM @ argus1; Ar38 = L @ 12/7/12 10:54 PM @ argus1; Ar37 = L @ 12/…		PPLLPLAAAAAA	1	Unknown CO2	6.33629e-12	Pychron CO2	3	3	0	3	0	33	31	36			0	17.433
	16	3	4.83627	-0.0099378	0.4134	0.309587	-	97.4361	80.2477	1.78613								61413-16	CM-SS3	35	2012-12-08	0.166667	3437770000		Sanidine	4	Iain Mason		129.138.12.160	7.875	H1 Baseline = A @ 12/8/12 12:16 AM @ argus1; AX Baseline = A @ 12/8/12 12:16 AM @ argus1; L1 Baseline = A @ 12/8/12 12:16 AM @ argus1; L2 Baseline = A @ 12/8/12 12:16 AM @ argus1; CDD Baseline = A @ 12/8/12 12:16 AM @ argus1; H2 Baseline = A @ 12/8/12 12:16 AM @ argus1; Ar40 = P @ 12/8/12 12:16 AM @ argus1; Ar39 = P @ 12/8/12 12:16 AM @ argus1; Ar38 = L @ 12/8/12 12:16 AM @ argus1; Ar37 = L @ 12/…		PPLLPLAAAAAA	1	Unknown CO2	9.09279e-14	Pychron CO2	3	3	0	3	0	33	31	41			0	29.9448
	20	3	6.76833	0.0073563	0.1485	0.582864	69.3561	99.3538	113.527	1.25551								61413-20	CM-SS3	35	2012-12-08	1.23333	3437774000		Sanidine	4	Iain Mason		129.138.12.160	7.875	H1 Baseline = A @ 12/8/12 1:20 AM @ argus1; AX Baseline = A @ 12/8/12 1:20 AM @ argus1; L1 Baseline = A @ 12/8/12 1:20 AM @ argus1; L2 Baseline = A @ 12/8/12 1:20 AM @ argus1; CDD Baseline = A @ 12/8/12 1:20 AM @ argus1; H2 Baseline = A @ 12/8/12 1:20 AM @ argus1; Ar40 = P @ 12/8/12 1:20 AM @ argus1; Ar39 = P @ 12/8/12 1:20 AM @ argus1; Ar38 = L @ 12/8/12 1:20 AM @ argus1; Ar37 = L @ 12/8/12 1:20…		PPLLPLAAAAAA	1	Unknown CO2	2.75728e-15	Pychron CO2	3	3	0	3	0	33	31	45			0	78.9008
	26	3	7.03219	0.0108209	0.7355	0.329602	47.1499	96.887	114.983	1.87844								61413-26	CM-SS3	35	2012-12-08	2.56667	3437779000		Sanidine	4	Iain Mason		129.138.12.160	7.875	H1 Baseline = A @ 12/8/12 2:41 AM @ argus1; AX Baseline = A @ 12/8/12 2:41 AM @ argus1; L1 Baseline = A @ 12/8/12 2:41 AM @ argus1; L2 Baseline = A @ 12/8/12 2:41 AM @ argus1; CDD Baseline = A @ 12/8/12 2:41 AM @ argus1; H2 Baseline = A @ 12/8/12 2:41 AM @ argus1; Ar40 = P @ 12/8/12 2:41 AM @ argus1; Ar39 = P @ 12/8/12 2:41 AM @ argus1; Ar38 = L @ 12/8/12 2:41 AM @ argus1; Ar37 = L @ 12/8/12 2:41…		PPLLPLAAAAAA	1	Unknown CO2	2.20957e-17	Pychron CO2	3	3	0	3	0	33	31	51			0	46.3569
	24	3	7.99837	0.047964	0.4136	0.169225	10.6372	98.498	132.341	3.92873								61413-24	CM-SS3	35	2012-12-08	2.28333	3437778000		Sanidine	4	Iain Mason		129.138.12.160	7.875	H1 Baseline = A @ 12/8/12 2:23 AM @ argus1; AX Baseline = A @ 12/8/12 2:23 AM @ argus1; L1 Baseline = A @ 12/8/12 2:23 AM @ argus1; L2 Baseline = A @ 12/8/12 2:23 AM @ argus1; CDD Baseline = A @ 12/8/12 2:23 AM @ argus1; H2 Baseline = A @ 12/8/12 2:23 AM @ argus1; Ar40 = P @ 12/8/12 2:23 AM @ argus1; Ar39 = P @ 12/8/12 2:23 AM @ argus1; Ar38 = L @ 12/8/12 2:23 AM @ argus1; Ar37 = L @ 12/8/12 2:23…		PPLLPLAAAAAA	1	Unknown CO2	7.08564e-17	Pychron CO2	3	3	0	3	0	33	31	49			0	27.0714
	19	3	8.61679	0.0031694	0.2133	1.60683	160.978	99.2644	143.256	0.597059								61413-19	CM-SS3	35	2012-12-08	1.08333	3437774000		Sanidine	4	Iain Mason		129.138.12.160	7.875	H1 Baseline = A @ 12/8/12 1:12 AM @ argus1; AX Baseline = A @ 12/8/12 1:12 AM @ argus1; L1 Baseline = A @ 12/8/12 1:12 AM @ argus1; L2 Baseline = A @ 12/8/12 1:12 AM @ argus1; CDD Baseline = A @ 12/8/12 1:12 AM @ argus1; H2 Baseline = A @ 12/8/12 1:12 AM @ argus1; Ar40 = P @ 12/8/12 1:12 AM @ argus1; Ar39 = P @ 12/8/12 1:12 AM @ argus1; Ar38 = L @ 12/8/12 1:12 AM @ argus1; Ar37 = L @ 12/8/12 1:12…		PPLLPLAAAAAA	1	Unknown CO2	4.93761e-15	Pychron CO2	3	3	0	3	0	33	31	44			0	276.915
	35	3	8.68115	0.0106224	0.4272	0.461419	48.031	98.5416	143.276	1.75668								61413-35	CM-SS3	35	2012-12-08	4.68333	3437787000		Sanidine	4	Iain Mason		129.138.12.160	7.875	H1 Baseline = A @ 12/8/12 4:48 AM @ argus1; AX Baseline = A @ 12/8/12 4:48 AM @ argus1; L1 Baseline = A @ 12/8/12 4:48 AM @ argus1; L2 Baseline = A @ 12/8/12 4:48 AM @ argus1; CDD Baseline = A @ 12/8/12 4:48 AM @ argus1; H2 Baseline = A @ 12/8/12 4:48 AM @ argus1; Ar40 = P @ 12/8/12 4:48 AM @ argus1; Ar39 = P @ 12/8/12 4:48 AM @ argus1; Ar38 = L @ 12/8/12 4:48 AM @ argus1; Ar37 = L @ 12/8/12 4:48…		PPLLPLAAAAAA	1	Unknown CO2	1.72182e-20	Pychron CO2	3	3	0	3	0	33	31	60			0	80.1135
	18	3	11.8439	-0.0132908	1.4316	0.298931	-	96.3869	188.843	2.87277								61413-18	CM-SS3	35	2012-12-08	0.783333	3437772000		Sanidine	4	Iain Mason		129.138.12.160	7.875	H1 Baseline = A @ 12/8/12 12:54 AM @ argus1; AX Baseline = A @ 12/8/12 12:54 AM @ argus1; L1 Baseline = A @ 12/8/12 12:54 AM @ argus1; L2 Baseline = A @ 12/8/12 12:54 AM @ argus1; CDD Baseline = A @ 12/8/12 12:54 AM @ argus1; H2 Baseline = A @ 12/8/12 12:54 AM @ argus1; Ar40 = P @ 12/8/12 12:54 AM @ argus1; Ar39 = P @ 12/8/12 12:54 AM @ argus1; Ar38 = L @ 12/8/12 12:54 AM @ argus1; Ar37 = L @ 12/…		PPLLPLAAAAAA	1	Unknown CO2	1.58339e-14	Pychron CO2	3	3	0	3	0	33	31	43			0	70.8092
	09	3	11.5005	0.0089528	0.0457	0.570621	56.9882	99.8879	189.969	1.56155								61413-09	CM-SS3	35	2012-12-07	22.4833	3437764000		Sanidine	4	Iain Mason		129.138.12.160	7.875	H1 Baseline = A @ 12/7/12 10:36 PM @ argus1; AX Baseline = A @ 12/7/12 10:36 PM @ argus1; L1 Baseline = A @ 12/7/12 10:36 PM @ argus1; L2 Baseline = A @ 12/7/12 10:36 PM @ argus1; CDD Baseline = A @ 12/7/12 10:36 PM @ argus1; H2 Baseline = A @ 12/7/12 10:36 PM @ argus1; Ar40 = P @ 12/7/12 10:36 PM @ argus1; Ar39 = P @ 12/7/12 10:36 PM @ argus1; Ar38 = L @ 12/7/12 10:36 PM @ argus1; Ar37 = L @ 12/…		PPLLPLAAAAAA	1	Unknown CO2	2.03192e-11	Pychron CO2	3	3	0	3	0	33	31	34			0	131.25
	28	3	13.4834	-0.0073194	0.1058	0.335637	-	99.7628	220.577	2.85703								61413-28	CM-SS3	35	2012-12-08	3.2	3437781000		Sanidine	4	Iain Mason		129.138.12.160	7.875	H1 Baseline = A @ 12/8/12 3:19 AM @ argus1; AX Baseline = A @ 12/8/12 3:19 AM @ argus1; L1 Baseline = A @ 12/8/12 3:19 AM @ argus1; L2 Baseline = A @ 12/8/12 3:19 AM @ argus1; CDD Baseline = A @ 12/8/12 3:19 AM @ argus1; H2 Baseline = A @ 12/8/12 3:19 AM @ argus1; Ar40 = P @ 12/8/12 3:19 AM @ argus1; Ar39 = P @ 12/8/12 3:19 AM @ argus1; Ar38 = L @ 12/8/12 3:19 AM @ argus1; Ar37 = L @ 12/8/12 3:19…		PPLLPLAAAAAA	1	Unknown CO2	3.84768e-18	Pychron CO2	3	3	0	3	0	33	31	53			0	90.5103
	04	3	13.8135	0.0087156	0.0595	1.12712	58.5392	99.8771	225.907	1.11425								61413-04	CM-SS3	35	2012-12-07	21.2833	3437760000		Sanidine	4	Iain Mason		129.138.12.160	7.875	H1 Baseline = A @ 12/7/12 9:24 PM @ argus1; AX Baseline = A @ 12/7/12 9:24 PM @ argus1; L1 Baseline = A @ 12/7/12 9:24 PM @ argus1; L2 Baseline = A @ 12/7/12 9:24 PM @ argus1; CDD Baseline = A @ 12/7/12 9:24 PM @ argus1; H2 Baseline = A @ 12/7/12 9:24 PM @ argus1; Ar40 = P @ 12/7/12 9:24 PM @ argus1; Ar39 = P @ 12/7/12 9:24 PM @ argus1; Ar38 = L @ 12/7/12 9:24 PM @ argus1; Ar37 = L @ 12/7/12 9:24…		PPLLPLAAAAAA	1	Unknown CO2	1.41594e-09	Pychron CO2	3	3	0	3	0	33	31	29			0	311.393
	15	3	18.024	-0.011352	0.2946	0.308797	-	99.508	288.609	3.91499								61413-15	CM-SS3	35	2012-12-08	0.0166667	3437770000		Sanidine	4	Iain Mason		129.138.12.160	7.875	H1 Baseline = A @ 12/8/12 12:07 AM @ argus1; AX Baseline = A @ 12/8/12 12:07 AM @ argus1; L1 Baseline = A @ 12/8/12 12:07 AM @ argus1; L2 Baseline = A @ 12/8/12 12:07 AM @ argus1; CDD Baseline = A @ 12/8/12 12:07 AM @ argus1; H2 Baseline = A @ 12/8/12 12:07 AM @ argus1; Ar40 = P @ 12/8/12 12:07 AM @ argus1; Ar39 = P @ 12/8/12 12:07 AM @ argus1; Ar38 = L @ 12/8/12 12:07 AM @ argus1; Ar37 = L @ 12/…		PPLLPLAAAAAA	1	Unknown CO2	1.62829e-13	Pychron CO2	3	3	0	3	0	33	31	40			0	111.315
	10	3	18.503	-0.0134258	0.1628	0.345301	-	99.7353	296.317	3.5276								61413-10	CM-SS3	35	2012-12-07	22.6333	3437765000		Sanidine	4	Iain Mason		129.138.12.160	7.875	H1 Baseline = A @ 12/7/12 10:45 PM @ argus1; AX Baseline = A @ 12/7/12 10:45 PM @ argus1; L1 Baseline = A @ 12/7/12 10:45 PM @ argus1; L2 Baseline = A @ 12/7/12 10:45 PM @ argus1; CDD Baseline = A @ 12/7/12 10:45 PM @ argus1; H2 Baseline = A @ 12/7/12 10:45 PM @ argus1; Ar40 = P @ 12/7/12 10:45 PM @ argus1; Ar39 = P @ 12/7/12 10:45 PM @ argus1; Ar38 = L @ 12/7/12 10:45 PM @ argus1; Ar37 = L @ 12/…		PPLLPLAAAAAA	1	Unknown CO2	1.13467e-11	Pychron CO2	3	3	0	3	0	33	31	35			0	127.781
	03	3	21.3094	0.0100881	0.3045	0.494345	50.5748	99.5786	336.886	3.49102								61413-03	CM-SS3	35	2012-12-07	21.1333	3437759000		Sanidine	4	Iain Mason		129.138.12.160	7.875	H1 Baseline = A @ 12/7/12 9:15 PM @ argus1; AX Baseline = A @ 12/7/12 9:15 PM @ argus1; L1 Baseline = A @ 12/7/12 9:15 PM @ argus1; L2 Baseline = A @ 12/7/12 9:15 PM @ argus1; CDD Baseline = A @ 12/7/12 9:15 PM @ argus1; H2 Baseline = A @ 12/7/12 9:15 PM @ argus1; Ar40 = P @ 12/7/12 9:15 PM @ argus1; Ar39 = P @ 12/7/12 9:15 PM @ argus1; Ar38 = L @ 12/7/12 9:15 PM @ argus1; Ar37 = L @ 12/7/12 9:15…		PPLLPLAAAAAA	1	Unknown CO2	2.5356e-09	Pychron CO2	3	3	0	3	0	33	31	28			0	210.685
	47	3	22.8014	0.0252607	0.3505	0.231885	20.1975	99.5483	358.217	5.09276								61413-47	CM-SS3	35	2012-12-08	7.53333	3437797000		Sanidine	4	Iain Mason		129.138.12.160	7.875	H1 Baseline = A @ 12/8/12 7:39 AM @ argus1; AX Baseline = A @ 12/8/12 7:39 AM @ argus1; L1 Baseline = A @ 12/8/12 7:39 AM @ argus1; L2 Baseline = A @ 12/8/12 7:39 AM @ argus1; CDD Baseline = A @ 12/8/12 7:39 AM @ argus1; H2 Baseline = A @ 12/8/12 7:39 AM @ argus1; Ar40 = P @ 12/8/12 7:39 AM @ argus1; Ar39 = P @ 12/8/12 7:39 AM @ argus1; Ar38 = L @ 12/8/12 7:39 AM @ argus1; Ar37 = L @ 12/8/12 7:39…		PPLLPLAAAAAA	1	Unknown CO2	6.17454e-25	Pychron CO2	3	3	0	3	0	33	31	72			0	105.748
	23	3	23.712	-0.0417698	0.208	0.184014	-	99.7259	371.751	7.10361								61413-23	CM-SS3	35	2012-12-08	2.13333	3437777000		Sanidine	4	Iain Mason		129.138.12.160	7.875	H1 Baseline = A @ 12/8/12 2:14 AM @ argus1; AX Baseline = A @ 12/8/12 2:14 AM @ argus1; L1 Baseline = A @ 12/8/12 2:14 AM @ argus1; L2 Baseline = A @ 12/8/12 2:14 AM @ argus1; CDD Baseline = A @ 12/8/12 2:14 AM @ argus1; H2 Baseline = A @ 12/8/12 2:14 AM @ argus1; Ar40 = P @ 12/8/12 2:14 AM @ argus1; Ar39 = P @ 12/8/12 2:14 AM @ argus1; Ar38 = L @ 12/8/12 2:14 AM @ argus1; Ar37 = L @ 12/8/12 2:14…		PPLLPLAAAAAA	1	Unknown CO2	1.26886e-16	Pychron CO2	3	3	0	3	0	33	31	48			0	87.2642
	42	3	27.1846	0.0112595	0.1882	0.441435	45.3132	99.7967	420.668	4.75948								61413-42	CM-SS3	35	2012-12-08	6.18333	3437792000		Sanidine	4	Iain Mason		129.138.12.160	7.875	H1 Baseline = A @ 12/8/12 6:18 AM @ argus1; AX Baseline = A @ 12/8/12 6:18 AM @ argus1; L1 Baseline = A @ 12/8/12 6:18 AM @ argus1; L2 Baseline = A @ 12/8/12 6:18 AM @ argus1; CDD Baseline = A @ 12/8/12 6:18 AM @ argus1; H2 Baseline = A @ 12/8/12 6:18 AM @ argus1; Ar40 = P @ 12/8/12 6:18 AM @ argus1; Ar39 = P @ 12/8/12 6:18 AM @ argus1; Ar38 = L @ 12/8/12 6:18 AM @ argus1; Ar37 = L @ 12/8/12 6:18…		PPLLPLAAAAAA	1	Unknown CO2	7.70511e-23	Pychron CO2	3	3	0	3	0	33	31	67			0	240.007
	41	3	28.0857	-0.0407495	0.0732	0.239072	-	99.9083	433.504	5.91838								61413-41	CM-SS3	35	2012-12-08	6.03333	3437791000		Sanidine	4	Iain Mason		129.138.12.160	7.875	H1 Baseline = A @ 12/8/12 6:09 AM @ argus1; AX Baseline = A @ 12/8/12 6:09 AM @ argus1; L1 Baseline = A @ 12/8/12 6:09 AM @ argus1; L2 Baseline = A @ 12/8/12 6:09 AM @ argus1; CDD Baseline = A @ 12/8/12 6:09 AM @ argus1; H2 Baseline = A @ 12/8/12 6:09 AM @ argus1; Ar40 = P @ 12/8/12 6:09 AM @ argus1; Ar39 = P @ 12/8/12 6:09 AM @ argus1; Ar38 = L @ 12/8/12 6:09 AM @ argus1; Ar37 = L @ 12/8/12 6:09…		PPLLPLAAAAAA	1	Unknown CO2	1.3798e-22	Pychron CO2	3	3	0	3	0	33	31	66			0	134.286
	34	3	40.5376	-0.0001688	0.0961	1.27581	-	99.9294	597.271	2.81759								61413-34	CM-SS3	35	2012-12-08	4.53333	3437786000		Sanidine	4	Iain Mason		129.138.12.160	7.875	H1 Baseline = A @ 12/8/12 4:39 AM @ argus1; AX Baseline = A @ 12/8/12 4:39 AM @ argus1; L1 Baseline = A @ 12/8/12 4:39 AM @ argus1; L2 Baseline = A @ 12/8/12 4:39 AM @ argus1; CDD Baseline = A @ 12/8/12 4:39 AM @ argus1; H2 Baseline = A @ 12/8/12 4:39 AM @ argus1; Ar40 = P @ 12/8/12 4:39 AM @ argus1; Ar39 = P @ 12/8/12 4:39 AM @ argus1; Ar38 = L @ 12/8/12 4:39 AM @ argus1; Ar37 = L @ 12/8/12 4:39…		PPLLPLAAAAAA	1	Unknown CO2	3.08336e-20	Pychron CO2	3	3	0	3	0	33	31	59			0	1034.37
	06	3	51.8942	-0.0099043	0.0451	0.515516	-	99.9724	735.028	4.94312								61413-06	CM-SS3	35	2012-12-07	21.8	3437762000		Sanidine	4	Iain Mason		129.138.12.160	7.875	H1 Baseline = A @ 12/7/12 9:55 PM @ argus1; AX Baseline = A @ 12/7/12 9:55 PM @ argus1; L1 Baseline = A @ 12/7/12 9:55 PM @ argus1; L2 Baseline = A @ 12/7/12 9:55 PM @ argus1; CDD Baseline = A @ 12/7/12 9:55 PM @ argus1; H2 Baseline = A @ 12/7/12 9:55 PM @ argus1; Ar40 = P @ 12/7/12 9:55 PM @ argus1; Ar39 = P @ 12/7/12 9:55 PM @ argus1; Ar38 = L @ 12/7/12 9:55 PM @ argus1; Ar37 = L @ 12/7/12 9:55…		PPLLPLAAAAAA	1	Unknown CO2	2.08954e-10	Pychron CO2	3	3	0	3	0	33	31	31			0	535.042
	32	3	52.8672	0.0193691	0.0662	0.513691	26.3411	99.9657	746.317	5.42545								61413-32	CM-SS3	35	2012-12-08	4	3437784000		Sanidine	4	Iain Mason		129.138.12.160	7.875	H1 Baseline = A @ 12/8/12 4:07 AM @ argus1; AX Baseline = A @ 12/8/12 4:07 AM @ argus1; L1 Baseline = A @ 12/8/12 4:07 AM @ argus1; L2 Baseline = A @ 12/8/12 4:07 AM @ argus1; CDD Baseline = A @ 12/8/12 4:07 AM @ argus1; H2 Baseline = A @ 12/8/12 4:07 AM @ argus1; Ar40 = P @ 12/8/12 4:07 AM @ argus1; Ar39 = P @ 12/8/12 4:07 AM @ argus1; Ar38 = L @ 12/8/12 4:07 AM @ argus1; Ar37 = L @ 12/8/12 4:07…		PPLLPLAAAAAA	1	Unknown CO2	1.77065e-19	Pychron CO2	3	3	0	3	0	33	31	57			0	543.156
	36	3	58.8434	0.002594	-0.2266	0.398028	196.686	100.115	815.304	7.32932								61413-36	CM-SS3	35	2012-12-08	4.83333	3437787000		Sanidine	4	Iain Mason		129.138.12.160	7.875	H1 Baseline = A @ 12/8/12 4:57 AM @ argus1; AX Baseline = A @ 12/8/12 4:57 AM @ argus1; L1 Baseline = A @ 12/8/12 4:57 AM @ argus1; L2 Baseline = A @ 12/8/12 4:57 AM @ argus1; CDD Baseline = A @ 12/8/12 4:57 AM @ argus1; H2 Baseline = A @ 12/8/12 4:57 AM @ argus1; Ar40 = P @ 12/8/12 4:57 AM @ argus1; Ar39 = P @ 12/8/12 4:57 AM @ argus1; Ar38 = L @ 12/8/12 4:57 AM @ argus1; Ar37 = L @ 12/8/12 4:57…		PPLLPLAAAAAA	1	Unknown CO2	9.61508e-21	Pychron CO2	3	3	0	3	0	33	31	61			0	468.428
	08	3	59.4754	-0.0100665	-0.1966	0.553565	-	100.097	822.235	6.62149								61413-08	CM-SS3	35	2012-12-07	22.3333	3437764000		Sanidine	4	Iain Mason		129.138.12.160	7.875	H1 Baseline = A @ 12/7/12 10:27 PM @ argus1; AX Baseline = A @ 12/7/12 10:27 PM @ argus1; L1 Baseline = A @ 12/7/12 10:27 PM @ argus1; L2 Baseline = A @ 12/7/12 10:27 PM @ argus1; CDD Baseline = A @ 12/7/12 10:27 PM @ argus1; H2 Baseline = A @ 12/7/12 10:27 PM @ argus1; Ar40 = P @ 12/7/12 10:27 PM @ argus1; Ar39 = P @ 12/7/12 10:27 PM @ argus1; Ar38 = L @ 12/7/12 10:27 PM @ argus1; Ar37 = L @ 12/…		PPLLPLAAAAAA	1	Unknown CO2	3.63867e-11	Pychron CO2	3	3	0	3	0	33	31	33			0	658.465
	44	3	65.8572	-0.0166969	0.3874	0.235373	-	99.8222	890.03	13.4436								61413-44	CM-SS3	35	2012-12-08	6.86667	3437794000		Sanidine	4	Iain Mason		129.138.12.160	7.875	H1 Baseline = A @ 12/8/12 6:59 AM @ argus1; AX Baseline = A @ 12/8/12 6:59 AM @ argus1; L1 Baseline = A @ 12/8/12 6:59 AM @ argus1; L2 Baseline = A @ 12/8/12 6:59 AM @ argus1; CDD Baseline = A @ 12/8/12 6:59 AM @ argus1; H2 Baseline = A @ 12/8/12 6:59 AM @ argus1; Ar40 = P @ 12/8/12 6:59 AM @ argus1; Ar39 = P @ 12/8/12 6:59 AM @ argus1; Ar38 = L @ 12/8/12 6:59 AM @ argus1; Ar37 = L @ 12/8/12 6:59…		PPLLPLAAAAAA	1	Unknown CO2	7.49264e-24	Pychron CO2	3	3	0	3	0	33	31	69			0	310.016
	46	3	72.2706	0.284087	5.3967	0.0257058	1.79594	97.8049	942.448	89.8138								61413-46	CM-SS3	35	2012-12-08	7.16667	3437795000		Sanidine	4	Iain Mason		129.138.12.160	7.875	H1 Baseline = A @ 12/8/12 7:17 AM @ argus1; AX Baseline = A @ 12/8/12 7:17 AM @ argus1; L1 Baseline = A @ 12/8/12 7:17 AM @ argus1; L2 Baseline = A @ 12/8/12 7:17 AM @ argus1; CDD Baseline = A @ 12/8/12 7:17 AM @ argus1; H2 Baseline = A @ 12/8/12 7:17 AM @ argus1; Ar40 = P @ 12/8/12 7:17 AM @ argus1; Ar39 = P @ 12/8/12 7:17 AM @ argus1; Ar38 = L @ 12/8/12 7:17 AM @ argus1; Ar37 = L @ 12/8/12 7:17…		PPLLPLAAAAAA	1	Unknown CO2	2.33648e-24	Pychron CO2	3	3	0	3	0	33	31	71			0	37.1629
	45	3	74.725	0.0216029	-0.1711	0.317663	23.6174	100.071	984.485	8.58092								61413-45	CM-SS3	35	2012-12-08	7.01667	3437795000		Sanidine	4	Iain Mason		129.138.12.160	7.875	H1 Baseline = A @ 12/8/12 7:08 AM @ argus1; AX Baseline = A @ 12/8/12 7:08 AM @ argus1; L1 Baseline = A @ 12/8/12 7:08 AM @ argus1; L2 Baseline = A @ 12/8/12 7:08 AM @ argus1; CDD Baseline = A @ 12/8/12 7:08 AM @ argus1; H2 Baseline = A @ 12/8/12 7:08 AM @ argus1; Ar40 = P @ 12/8/12 7:08 AM @ argus1; Ar39 = P @ 12/8/12 7:08 AM @ argus1; Ar38 = L @ 12/8/12 7:08 AM @ argus1; Ar37 = L @ 12/8/12 7:08…		PPLLPLAAAAAA	1	Unknown CO2	4.18407e-24	Pychron CO2	3	3	0	3	0	33	31	70			0	474.754
	13	3	75.7868	-0.0022442	-0.1834	0.302684	-	100.072	995.268	8.45675								61413-13	CM-SS3	35	2012-12-07	23.4	3437767000		Sanidine	4	Iain Mason		129.138.12.160	7.875	H1 Baseline = A @ 12/7/12 11:31 PM @ argus1; AX Baseline = A @ 12/7/12 11:31 PM @ argus1; L1 Baseline = A @ 12/7/12 11:31 PM @ argus1; L2 Baseline = A @ 12/7/12 11:31 PM @ argus1; CDD Baseline = A @ 12/7/12 11:31 PM @ argus1; H2 Baseline = A @ 12/7/12 11:31 PM @ argus1; Ar40 = P @ 12/7/12 11:31 PM @ argus1; Ar39 = P @ 12/7/12 11:31 PM @ argus1; Ar38 = L @ 12/7/12 11:31 PM @ argus1; Ar37 = L @ 12/…		PPLLPLAAAAAA	1	Unknown CO2	1.10339e-12	Pychron CO2	3	3	0	3	0	33	31	38			0	458.788
	33	3	76.6145	0.0028064	0.136	0.59802	181.8	99.9474	1002.68	7.1308								61413-33	CM-SS3	35	2012-12-08	4.4	3437785000		Sanidine	4	Iain Mason		129.138.12.160	7.875	H1 Baseline = A @ 12/8/12 4:30 AM @ argus1; AX Baseline = A @ 12/8/12 4:30 AM @ argus1; L1 Baseline = A @ 12/8/12 4:30 AM @ argus1; L2 Baseline = A @ 12/8/12 4:30 AM @ argus1; CDD Baseline = A @ 12/8/12 4:30 AM @ argus1; H2 Baseline = A @ 12/8/12 4:30 AM @ argus1; Ar40 = P @ 12/8/12 4:30 AM @ argus1; Ar39 = P @ 12/8/12 4:30 AM @ argus1; Ar38 = L @ 12/8/12 4:30 AM @ argus1; Ar37 = L @ 12/8/12 4:30…		PPLLPLAAAAAA	1	Unknown CO2	5.52155e-20	Pychron CO2	3	3	0	3	0	33	31	58			0	916.342
	40	3	80.478	0.0494913	-0.3395	0.189909	10.309	100.131	1042.69	17.0672								61413-40	CM-SS3	35	2012-12-08	5.88333	3437791000		Sanidine	4	Iain Mason		129.138.12.160	7.875	H1 Baseline = A @ 12/8/12 6:00 AM @ argus1; AX Baseline = A @ 12/8/12 6:00 AM @ argus1; L1 Baseline = A @ 12/8/12 6:00 AM @ argus1; L2 Baseline = A @ 12/8/12 6:00 AM @ argus1; CDD Baseline = A @ 12/8/12 6:00 AM @ argus1; H2 Baseline = A @ 12/8/12 6:00 AM @ argus1; Ar40 = P @ 12/8/12 6:00 AM @ argus1; Ar39 = P @ 12/8/12 6:00 AM @ argus1; Ar38 = L @ 12/8/12 6:00 AM @ argus1; Ar37 = L @ 12/8/12 6:00…		PPLLPLAAAAAA	1	Unknown CO2	2.47087e-22	Pychron CO2	3	3	0	3	0	33	31	65			0	305.68
	02	3	81.5325	0.0029659	0.5994	1.45114	172.023	99.7812	1050.25	0.554356								61413-02	CM-SS3	35	2012-12-07	14.6667	3437736000		Sanidine	4	Iain Mason		129.138.12.160	7.875	H1 Baseline = A @ 12/7/12 2:53 PM @ argus1; AX Baseline = A @ 12/7/12 2:53 PM @ argus1; L1 Baseline = A @ 12/7/12 2:53 PM @ argus1; L2 Baseline = A @ 12/7/12 2:53 PM @ argus1; CDD Baseline = A @ 12/7/12 2:53 PM @ argus1; H2 Baseline = A @ 12/7/12 2:53 PM @ argus1; Ar40 = P @ 12/7/12 2:53 PM @ argus1; Ar39 = P @ 12/7/12 2:53 PM @ argus1; Ar38 = L @ 12/7/12 2:53 PM @ argus1; Ar37 = L @ 12/7/12 2:53…	Test Signal Strength	PPLLPLAAAAAA	1	Unknown CO2	0.246587	Pychron CO2	3	3	0	3	0	33	31	27			0	2366.3
	39	3	81.4038	0.0058139	-0.1275	0.505335	87.7559	100.047	1051.12	7.95134								61413-39	CM-SS3	35	2012-12-08	5.73333	3437790000		Sanidine	4	Iain Mason		129.138.12.160	7.875	H1 Baseline = A @ 12/8/12 5:51 AM @ argus1; AX Baseline = A @ 12/8/12 5:51 AM @ argus1; L1 Baseline = A @ 12/8/12 5:51 AM @ argus1; L2 Baseline = A @ 12/8/12 5:51 AM @ argus1; CDD Baseline = A @ 12/8/12 5:51 AM @ argus1; H2 Baseline = A @ 12/8/12 5:51 AM @ argus1; Ar40 = P @ 12/8/12 5:51 AM @ argus1; Ar39 = P @ 12/8/12 5:51 AM @ argus1; Ar38 = L @ 12/8/12 5:51 AM @ argus1; Ar37 = L @ 12/8/12 5:51…		PPLLPLAAAAAA	1	Unknown CO2	4.42473e-22	Pychron CO2	3	3	0	3	0	33	31	64			0	822.726
	05	3	85.4919	0.0212977	0.5586	0.217452	23.9558	99.8073	1088.88	14.0594								61413-05	CM-SS3	35	2012-12-07	21.4333	3437760000		Sanidine	4	Iain Mason		129.138.12.160	7.875	H1 Baseline = A @ 12/7/12 9:33 PM @ argus1; AX Baseline = A @ 12/7/12 9:33 PM @ argus1; L1 Baseline = A @ 12/7/12 9:33 PM @ argus1; L2 Baseline = A @ 12/7/12 9:33 PM @ argus1; CDD Baseline = A @ 12/7/12 9:33 PM @ argus1; H2 Baseline = A @ 12/7/12 9:33 PM @ argus1; Ar40 = P @ 12/7/12 9:33 PM @ argus1; Ar39 = P @ 12/7/12 9:33 PM @ argus1; Ar38 = L @ 12/7/12 9:33 PM @ argus1; Ar37 = L @ 12/7/12 9:33…		PPLLPLAAAAAA	1	Unknown CO2	7.90696e-10	Pychron CO2	3	3	0	3	0	33	31	30			0	371.814
	31	3	90.1092	0.0050508	0.1748	0.303718	101.014	99.9425	1133.82	12.7223								61413-31	CM-SS3	35	2012-12-08	3.86667	3437784000		Sanidine	4	Iain Mason		129.138.12.160	7.875	H1 Baseline = A @ 12/8/12 3:58 AM @ argus1; AX Baseline = A @ 12/8/12 3:58 AM @ argus1; L1 Baseline = A @ 12/8/12 3:58 AM @ argus1; L2 Baseline = A @ 12/8/12 3:58 AM @ argus1; CDD Baseline = A @ 12/8/12 3:58 AM @ argus1; H2 Baseline = A @ 12/8/12 3:58 AM @ argus1; Ar40 = P @ 12/8/12 3:58 AM @ argus1; Ar39 = P @ 12/8/12 3:58 AM @ argus1; Ar38 = L @ 12/8/12 3:58 AM @ argus1; Ar37 = L @ 12/8/12 3:58…		PPLLPLAAAAAA	1	Unknown CO2	3.1708e-19	Pychron CO2	3	3	0	3	0	33	31	56			0	547.358
	38	3	92.0638	0.0181755	0.1368	0.361172	28.071	99.9575	1152.2	9.05425								61413-38	CM-SS3	35	2012-12-08	5.13333	3437788000		Sanidine	4	Iain Mason		129.138.12.160	7.875	H1 Baseline = A @ 12/8/12 5:15 AM @ argus1; AX Baseline = A @ 12/8/12 5:15 AM @ argus1; L1 Baseline = A @ 12/8/12 5:15 AM @ argus1; L2 Baseline = A @ 12/8/12 5:15 AM @ argus1; CDD Baseline = A @ 12/8/12 5:15 AM @ argus1; H2 Baseline = A @ 12/8/12 5:15 AM @ argus1; Ar40 = P @ 12/8/12 5:15 AM @ argus1; Ar39 = P @ 12/8/12 5:15 AM @ argus1; Ar38 = L @ 12/8/12 5:15 AM @ argus1; Ar37 = L @ 12/8/12 5:15…		PPLLPLAAAAAA	1	Unknown CO2	2.99834e-21	Pychron CO2	3	3	0	3	0	33	31	63			0	665.025
	21	3	94.4706	0.0043274	0.00385168	0.217225	117.901	99.9994	1174.77	16.8492								61413-21	CM-SS3	35	2012-12-08	1.36667	3437775000		Sanidine	4	Iain Mason		129.138.12.160	7.875	H1 Baseline = A @ 12/8/12 1:29 AM @ argus1; AX Baseline = A @ 12/8/12 1:29 AM @ argus1; L1 Baseline = A @ 12/8/12 1:29 AM @ argus1; L2 Baseline = A @ 12/8/12 1:29 AM @ argus1; CDD Baseline = A @ 12/8/12 1:29 AM @ argus1; H2 Baseline = A @ 12/8/12 1:29 AM @ argus1; Ar40 = P @ 12/8/12 1:29 AM @ argus1; Ar39 = P @ 12/8/12 1:29 AM @ argus1; Ar38 = L @ 12/8/12 1:29 AM @ argus1; Ar37 = L @ 12/8/12 1:29…		PPLLPLAAAAAA	1	Unknown CO2	1.53973e-15	Pychron CO2	3	3	0	3	0	33	31	46			0	410.429
	25	3	95.8152	0.0139132	0.1682	0.24923	36.6705	99.9488	1186.64	11.9978								61413-25	CM-SS3	35	2012-12-08	2.41667	3437778000		Sanidine	4	Iain Mason		129.138.12.160	7.875	H1 Baseline = A @ 12/8/12 2:32 AM @ argus1; AX Baseline = A @ 12/8/12 2:32 AM @ argus1; L1 Baseline = A @ 12/8/12 2:32 AM @ argus1; L2 Baseline = A @ 12/8/12 2:32 AM @ argus1; CDD Baseline = A @ 12/8/12 2:32 AM @ argus1; H2 Baseline = A @ 12/8/12 2:32 AM @ argus1; Ar40 = P @ 12/8/12 2:32 AM @ argus1; Ar39 = P @ 12/8/12 2:32 AM @ argus1; Ar38 = L @ 12/8/12 2:32 AM @ argus1; Ar37 = L @ 12/8/12 2:32…		PPLLPLAAAAAA	1	Unknown CO2	3.95679e-17	Pychron CO2	3	3	0	3	0	33	31	50			0	477.606
	01	3	102.207	0.0084346	1.1482	0.744664	60.4894	99.6659	1241.43	4.84705								61413-01	CM-SS3	35	2012-12-07	14.3167	3437735000		Sanidine	4	Iain Mason		129.138.12.160	7.875	H2 Baseline = A @ 12/7/12 2:32 PM @ argus1; H1 Baseline = A @ 12/7/12 2:32 PM @ argus1; AX Baseline = A @ 12/7/12 2:32 PM @ argus1; L1 Baseline = A @ 12/7/12 2:32 PM @ argus1; L2 Baseline = A @ 12/7/12 2:32 PM @ argus1; CDD Baseline = A @ 12/7/12 2:32 PM @ argus1; Ar40 = P @ 12/7/12 2:32 PM @ argus1; Ar39 = P @ 12/7/12 2:32 PM @ argus1; Ar38 = L @ 12/7/12 2:32 PM @ argus1; Ar37 = L @ 12/7/12 2:32…	Test Signal Strenght	PPLLPLAAAAAA	1	Unknown CO2	0.441576	Pychron CO2	3	3	0	3	0	34	32	26			0	1522.21
	37	3	110.237	7.36e-05	0.097	0.487743	6932.12	99.9739	1313.81	8.39918								61413-37	CM-SS3	35	2012-12-08	4.98333	3437788000		Sanidine	4	Iain Mason		129.138.12.160	7.875	H1 Baseline = A @ 12/8/12 5:06 AM @ argus1; AX Baseline = A @ 12/8/12 5:06 AM @ argus1; L1 Baseline = A @ 12/8/12 5:06 AM @ argus1; L2 Baseline = A @ 12/8/12 5:06 AM @ argus1; CDD Baseline = A @ 12/8/12 5:06 AM @ argus1; H2 Baseline = A @ 12/8/12 5:06 AM @ argus1; Ar40 = P @ 12/8/12 5:06 AM @ argus1; Ar39 = P @ 12/8/12 5:06 AM @ argus1; Ar38 = L @ 12/8/12 5:06 AM @ argus1; Ar37 = L @ 12/8/12 5:06…		PPLLPLAAAAAA	1	Unknown CO2	5.36929e-21	Pychron CO2	3	3	0	3	0	33	31	62			0	1075.35
	CM-SS3, Sanidine, J=0.0091862±0.04%, IC=1.05445±0.0011591, NM-258C, Lab#=61734, Argus VI
	22	4	4.00755	0.0026654	0.0111	1.44224	191.417	99.9237	66.0059	0.0421547								61734-22	CM-SS3	37	2013-08-13	0.783333	3459200000		Sanidine	26	Iain Mason		129.138.12.160	7.875	H2 Baseline = A @ 8/14/13 11:22 AM @ argonlab; H1 Baseline = A @ 8/14/13 11:22 AM @ argonlab; AX Baseline = A @ 8/14/13 11:22 AM @ argonlab; L1 Baseline = A @ 8/14/13 11:22 AM @ argonlab; L2 Baseline = A @ 8/14/13 11:22 AM @ argonlab; CDD Baseline = A @ 8/14/13 11:22 AM @ argonlab; Ar41 = A @ 8/14/13 11:22 AM @ argonlab; Ar40 = P @ 8/14/13 11:22 AM @ argonlab; Ar39 = P @ 8/14/13 11:22 AM @ argonl…	Hole 26 (80-100 Mesh)	APPLLPAAAAAA	1	Pychron Script	1	Fusions CO2	4	4	0	4	0	30	30	58			0	115.597
	40	4	4.21811	0.0054199	0.2034	0.880235	94.1353	98.5716	68.4935	0.0723976								61734-40	CM-SS3	37	2013-08-13	4.4	3459213000		Sanidine	26	Iain Mason		129.138.12.160	7.875	H2 Baseline = A @ 8/14/13 11:23 AM @ argonlab; H1 Baseline = A @ 8/14/13 11:23 AM @ argonlab; AX Baseline = A @ 8/14/13 11:23 AM @ argonlab; L1 Baseline = A @ 8/14/13 11:23 AM @ argonlab; L2 Baseline = A @ 8/14/13 11:23 AM @ argonlab; CDD Baseline = A @ 8/14/13 11:23 AM @ argonlab; Ar41 = A @ 8/14/13 11:23 AM @ argonlab; Ar40 = P @ 8/14/13 11:23 AM @ argonlab; Ar39 = P @ 8/14/13 11:23 AM @ argonl…	Hole 26 (80-100 Mesh)	APPLLPAAAAAA	1	Pychron Script	1	Fusions CO2	4	4	0	4	0	30	30	76			0	74.2588
	53	4	4.17429	0.013779	0.00870857	0.443156	37.0277	99.9622	68.7327	0.124729								61734-53	CM-SS3	37	2013-08-13	6.85	3459221000		Sanidine	26	Iain Mason		129.138.12.160	7.875	H2 Baseline = A @ 8/14/13 11:23 AM @ argonlab; H1 Baseline = A @ 8/14/13 11:23 AM @ argonlab; AX Baseline = A @ 8/14/13 11:23 AM @ argonlab; L1 Baseline = A @ 8/14/13 11:23 AM @ argonlab; L2 Baseline = A @ 8/14/13 11:23 AM @ argonlab; CDD Baseline = A @ 8/14/13 11:23 AM @ argonlab; Ar41 = A @ 8/14/13 11:23 AM @ argonlab; Ar40 = P @ 8/14/13 11:23 AM @ argonlab; Ar39 = P @ 8/14/13 11:23 AM @ argonl…	Hole 26 (80-100 Mesh)	APPLLPAAAAAA	1	Pychron Script	1	Fusions CO2	4	4	0	4	0	30	30	89			0	36.9975
	02	4	4.30227	0.0003206	0.3618	0.901523	1591.4	97.4899	69.0844	0.0749923								61734-02	CM-SS3	37	2013-08-12	20.1333	3459183000		Sanidine	26	Iain Mason		129.138.12.160	7.875	H2 Baseline = A @ 8/14/13 11:22 AM @ argonlab; H1 Baseline = A @ 8/14/13 11:22 AM @ argonlab; AX Baseline = A @ 8/14/13 11:22 AM @ argonlab; L1 Baseline = A @ 8/14/13 11:22 AM @ argonlab; L2 Baseline = A @ 8/14/13 11:22 AM @ argonlab; CDD Baseline = A @ 8/14/13 11:22 AM @ argonlab; Ar41 = A @ 8/14/13 11:22 AM @ argonlab; Ar40 = P @ 8/14/13 11:22 AM @ argonlab; Ar39 = P @ 8/14/13 11:22 AM @ argonl…	Hole 26 (80-100 Mesh)	APPLLPAAAAAA	1	Pychron Script	1	Fusions CO2	4	4	0	4	0	30	30	38			0	77.5719
	19	4	4.22541	0.0014588	-0.00156693	0.90174	349.742	100.014	69.5948	0.0635618								61734-19	CM-SS3	37	2013-08-13	0.05	3459197000		Sanidine	26	Iain Mason		129.138.12.160	7.875	H2 Baseline = A @ 8/14/13 11:22 AM @ argonlab; H1 Baseline = A @ 8/14/13 11:22 AM @ argonlab; AX Baseline = A @ 8/14/13 11:22 AM @ argonlab; L1 Baseline = A @ 8/14/13 11:22 AM @ argonlab; L2 Baseline = A @ 8/14/13 11:22 AM @ argonlab; CDD Baseline = A @ 8/14/13 11:22 AM @ argonlab; Ar41 = A @ 8/14/13 11:22 AM @ argonlab; Ar40 = P @ 8/14/13 11:22 AM @ argonlab; Ar39 = P @ 8/14/13 11:22 AM @ argonl…	Hole 26 (80-100 Mesh)	APPLLPAAAAAA	1	Pychron Script	1	Fusions CO2	4	4	0	4	0	30	30	55			0	76.2044
	15	4	4.2557	-0.0025002	0.085	1.01795	-	99.3974	69.6612	0.0564694								61734-15	CM-SS3	37	2013-08-12	22.9833	3459193000		Sanidine	26	Iain Mason		129.138.12.160	7.875	H2 Baseline = A @ 8/14/13 11:22 AM @ argonlab; H1 Baseline = A @ 8/14/13 11:22 AM @ argonlab; AX Baseline = A @ 8/14/13 11:22 AM @ argonlab; L1 Baseline = A @ 8/14/13 11:22 AM @ argonlab; L2 Baseline = A @ 8/14/13 11:22 AM @ argonlab; CDD Baseline = A @ 8/14/13 11:22 AM @ argonlab; Ar41 = A @ 8/14/13 11:22 AM @ argonlab; Ar40 = P @ 8/14/13 11:22 AM @ argonlab; Ar39 = P @ 8/14/13 11:22 AM @ argonl…	Hole 26 (80-100 Mesh)	APPLLPAAAAAA	1	Pychron Script	1	Fusions CO2	4	4	0	4	0	30	30	51			0	86.6416
	36	4	4.24326	0.0048633	0.0153	1.17757	104.909	99.9014	69.8069	0.0512309								61734-36	CM-SS3	37	2013-08-13	3.55	3459210000		Sanidine	26	Iain Mason		129.138.12.160	7.875	H2 Baseline = A @ 8/14/13 11:22 AM @ argonlab; H1 Baseline = A @ 8/14/13 11:22 AM @ argonlab; AX Baseline = A @ 8/14/13 11:22 AM @ argonlab; L1 Baseline = A @ 8/14/13 11:22 AM @ argonlab; L2 Baseline = A @ 8/14/13 11:22 AM @ argonlab; CDD Baseline = A @ 8/14/13 11:22 AM @ argonlab; Ar41 = A @ 8/14/13 11:22 AM @ argonlab; Ar40 = P @ 8/14/13 11:22 AM @ argonlab; Ar39 = P @ 8/14/13 11:22 AM @ argonl…	Hole 26 (80-100 Mesh)	APPLLPAAAAAA	1	Pychron Script	1	Fusions CO2	4	4	0	4	0	30	30	72			0	99.9345
	13	4	4.2912	0.0080515	0.1656	0.568919	63.3676	98.8607	69.8607	0.102887								61734-13	CM-SS3	37	2013-08-12	22.5667	3459192000		Sanidine	26	Iain Mason		129.138.12.160	7.875	H2 Baseline = A @ 8/14/13 11:22 AM @ argonlab; H1 Baseline = A @ 8/14/13 11:22 AM @ argonlab; AX Baseline = A @ 8/14/13 11:22 AM @ argonlab; L1 Baseline = A @ 8/14/13 11:22 AM @ argonlab; L2 Baseline = A @ 8/14/13 11:22 AM @ argonlab; CDD Baseline = A @ 8/14/13 11:22 AM @ argonlab; Ar41 = A @ 8/14/13 11:22 AM @ argonlab; Ar40 = P @ 8/14/13 11:22 AM @ argonlab; Ar39 = P @ 8/14/13 11:22 AM @ argonl…	Hole 26 (80-100 Mesh)	APPLLPAAAAAA	1	Pychron Script	1	Fusions CO2	4	4	0	4	0	30	30	49			0	48.8272
	06	4	4.27605	0.0119421	0.0593	2.0553	42.7231	99.6099	70.136	0.0751657								61734-06	CM-SS3	37	2013-08-12	21.0333	3459186000		Sanidine	26	Iain Mason		129.138.12.160	7.875	H2 Baseline = A @ 8/14/13 11:22 AM @ argonlab; H1 Baseline = A @ 8/14/13 11:22 AM @ argonlab; AX Baseline = A @ 8/14/13 11:22 AM @ argonlab; L1 Baseline = A @ 8/14/13 11:22 AM @ argonlab; L2 Baseline = A @ 8/14/13 11:22 AM @ argonlab; CDD Baseline = A @ 8/14/13 11:22 AM @ argonlab; Ar41 = A @ 8/14/13 11:22 AM @ argonlab; Ar40 = P @ 8/14/13 11:22 AM @ argonlab; Ar39 = P @ 8/14/13 11:22 AM @ argonl…	Hole 26 (80-100 Mesh)	APPLLPAAAAAA	1	Pychron Script	1	Fusions CO2	4	4	0	4	0	30	30	42			0	175.773
	58	4	4.29116	0.0172604	0.0326	0.334757	29.5592	99.7875	70.5029	0.430558								61734-58	CM-SS3	37	2013-08-13	8.01667	3459226000		Sanidine	26	Iain Mason		129.138.12.160	7.875	H2 Baseline = A @ 8/14/13 11:22 AM @ argonlab; H1 Baseline = A @ 8/14/13 11:22 AM @ argonlab; AX Baseline = A @ 8/14/13 11:22 AM @ argonlab; L1 Baseline = A @ 8/14/13 11:22 AM @ argonlab; L2 Baseline = A @ 8/14/13 11:22 AM @ argonlab; CDD Baseline = A @ 8/14/13 11:22 AM @ argonlab; Ar41 = A @ 8/14/13 11:22 AM @ argonlab; Ar40 = P @ 8/14/13 11:22 AM @ argonlab; Ar39 = P @ 8/14/13 11:22 AM @ argonl…	Hole 26 (80-100 Mesh)	APPLLPAAAAAA	1	Pychron Script	1	Fusions CO2	4	4	0	4	0	30	30	94			0	28.7302
	39	4	4.30389	0.0036676	-0.0108	1.55401	139.111	100.081	70.912	0.122462								61734-39	CM-SS3	37	2013-08-13	4.08333	3459212000		Sanidine	26	Iain Mason		129.138.12.160	7.875	H2 Baseline = A @ 8/14/13 11:23 AM @ argonlab; H1 Baseline = A @ 8/14/13 11:23 AM @ argonlab; AX Baseline = A @ 8/14/13 11:23 AM @ argonlab; L1 Baseline = A @ 8/14/13 11:23 AM @ argonlab; L2 Baseline = A @ 8/14/13 11:23 AM @ argonlab; CDD Baseline = A @ 8/14/13 11:23 AM @ argonlab; Ar41 = A @ 8/14/13 11:23 AM @ argonlab; Ar40 = P @ 8/14/13 11:23 AM @ argonlab; Ar39 = P @ 8/14/13 11:23 AM @ argonl…	Hole 26 (80-100 Mesh)	APPLLPAAAAAA	1	Pychron Script	1	Fusions CO2	4	4	0	4	0	30	30	75			0	133.766
	55	4	4.3602	0.0282245	0.1643	0.273851	18.0766	98.9153	71.0039	0.612431								61734-55	CM-SS3	37	2013-08-13	7.26667	3459223000		Sanidine	26	Iain Mason		129.138.12.160	7.875	H2 Baseline = A @ 8/14/13 11:23 AM @ argonlab; H1 Baseline = A @ 8/14/13 11:23 AM @ argonlab; AX Baseline = A @ 8/14/13 11:23 AM @ argonlab; L1 Baseline = A @ 8/14/13 11:23 AM @ argonlab; L2 Baseline = A @ 8/14/13 11:23 AM @ argonlab; CDD Baseline = A @ 8/14/13 11:23 AM @ argonlab; Ar41 = A @ 8/14/13 11:23 AM @ argonlab; Ar40 = P @ 8/14/13 11:23 AM @ argonlab; Ar39 = P @ 8/14/13 11:23 AM @ argonl…	Hole 26 (80-100 Mesh)	APPLLPAAAAAA	1	Pychron Script	1	Fusions CO2	4	4	0	4	0	30	30	91			0	23.8814
	44	4	4.36016	0.0301569	0.00564207	0.684006	16.9183	100.018	71.7793	0.227948								61734-44	CM-SS3	37	2013-08-13	5.26667	3459216000		Sanidine	26	Iain Mason		129.138.12.160	7.875	H2 Baseline = A @ 8/14/13 11:23 AM @ argonlab; H1 Baseline = A @ 8/14/13 11:23 AM @ argonlab; AX Baseline = A @ 8/14/13 11:23 AM @ argonlab; L1 Baseline = A @ 8/14/13 11:23 AM @ argonlab; L2 Baseline = A @ 8/14/13 11:23 AM @ argonlab; CDD Baseline = A @ 8/14/13 11:23 AM @ argonlab; Ar41 = A @ 8/14/13 11:23 AM @ argonlab; Ar40 = P @ 8/14/13 11:23 AM @ argonlab; Ar39 = P @ 8/14/13 11:23 AM @ argonl…	Hole 26 (80-100 Mesh)	APPLLPAAAAAA	1	Pychron Script	1	Fusions CO2	4	4	0	4	0	30	30	80			0	59.6487
	08	4	4.51318	-0.0014662	0.0095322	0.935845	-	99.9339	74.1898	0.177862								61734-08	CM-SS3	37	2013-08-12	21.25	3459187000		Sanidine	26	Iain Mason		129.138.12.160	7.875	H2 Baseline = A @ 8/14/13 11:22 AM @ argonlab; H1 Baseline = A @ 8/14/13 11:22 AM @ argonlab; AX Baseline = A @ 8/14/13 11:22 AM @ argonlab; L1 Baseline = A @ 8/14/13 11:22 AM @ argonlab; L2 Baseline = A @ 8/14/13 11:22 AM @ argonlab; CDD Baseline = A @ 8/14/13 11:22 AM @ argonlab; Ar41 = A @ 8/14/13 11:22 AM @ argonlab; Ar40 = P @ 8/14/13 11:22 AM @ argonlab; Ar39 = P @ 8/14/13 11:22 AM @ argonl…	Hole 26 (80-100 Mesh)	APPLLPAAAAAA	1	Pychron Script	1	Fusions CO2	4	4	0	4	0	30	30	44			0	84.4727
	34	4	4.5223	0.0070536	0.0239	1.01117	72.3324	99.855	74.2799	0.173207								61734-34	CM-SS3	37	2013-08-13	2.91667	3459207000		Sanidine	26	Iain Mason		129.138.12.160	7.875	H2 Baseline = A @ 8/14/13 11:22 AM @ argonlab; H1 Baseline = A @ 8/14/13 11:22 AM @ argonlab; AX Baseline = A @ 8/14/13 11:22 AM @ argonlab; L1 Baseline = A @ 8/14/13 11:22 AM @ argonlab; L2 Baseline = A @ 8/14/13 11:22 AM @ argonlab; CDD Baseline = A @ 8/14/13 11:22 AM @ argonlab; Ar41 = A @ 8/14/13 11:22 AM @ argonlab; Ar40 = P @ 8/14/13 11:22 AM @ argonlab; Ar39 = P @ 8/14/13 11:22 AM @ argonl…	Hole 26 (80-100 Mesh)	APPLLPAAAAAA	1	Pychron Script	1	Fusions CO2	4	4	0	4	0	30	30	70			0	91.4571
	54	4	4.56259	0.0168209	0.1455	1.36387	30.3316	99.0767	74.3574	0.151592								61734-54	CM-SS3	37	2013-08-13	6.95	3459222000		Sanidine	26	Iain Mason		129.138.12.160	7.875	H2 Baseline = A @ 8/14/13 11:23 AM @ argonlab; H1 Baseline = A @ 8/14/13 11:23 AM @ argonlab; AX Baseline = A @ 8/14/13 11:23 AM @ argonlab; L1 Baseline = A @ 8/14/13 11:23 AM @ argonlab; L2 Baseline = A @ 8/14/13 11:23 AM @ argonlab; CDD Baseline = A @ 8/14/13 11:23 AM @ argonlab; Ar41 = A @ 8/14/13 11:23 AM @ argonlab; Ar40 = P @ 8/14/13 11:23 AM @ argonlab; Ar39 = P @ 8/14/13 11:23 AM @ argonl…	Hole 26 (80-100 Mesh)	APPLLPAAAAAA	1	Pychron Script	1	Fusions CO2	4	4	0	4	0	30	30	90			0	124.457
	17	4	4.51861	-0.0105225	-0.0139	0.383443	-	100.078	74.3818	0.415529								61734-17	CM-SS3	37	2013-08-12	23.6333	3459195000		Sanidine	26	Iain Mason		129.138.12.160	7.875	H2 Baseline = A @ 8/14/13 11:22 AM @ argonlab; H1 Baseline = A @ 8/14/13 11:22 AM @ argonlab; AX Baseline = A @ 8/14/13 11:22 AM @ argonlab; L1 Baseline = A @ 8/14/13 11:22 AM @ argonlab; L2 Baseline = A @ 8/14/13 11:22 AM @ argonlab; CDD Baseline = A @ 8/14/13 11:22 AM @ argonlab; Ar41 = A @ 8/14/13 11:22 AM @ argonlab; Ar40 = P @ 8/14/13 11:22 AM @ argonlab; Ar39 = P @ 8/14/13 11:22 AM @ argonl…	Hole 26 (80-100 Mesh)	APPLLPAAAAAA	1	Pychron Script	1	Fusions CO2	4	4	0	4	0	30	30	53			0	34.6524
	51	4	4.59223	0.0170355	-0.00944155	0.730391	29.9495	100.089	75.5806	0.217063								61734-51	CM-SS3	37	2013-08-13	6.43333	3459220000		Sanidine	26	Iain Mason		129.138.12.160	7.875	H2 Baseline = A @ 8/14/13 11:23 AM @ argonlab; H1 Baseline = A @ 8/14/13 11:23 AM @ argonlab; AX Baseline = A @ 8/14/13 11:23 AM @ argonlab; L1 Baseline = A @ 8/14/13 11:23 AM @ argonlab; L2 Baseline = A @ 8/14/13 11:23 AM @ argonlab; CDD Baseline = A @ 8/14/13 11:23 AM @ argonlab; Ar41 = A @ 8/14/13 11:23 AM @ argonlab; Ar40 = P @ 8/14/13 11:23 AM @ argonlab; Ar39 = P @ 8/14/13 11:23 AM @ argonl…	Hole 26 (80-100 Mesh)	APPLLPAAAAAA	1	Pychron Script	1	Fusions CO2	4	4	0	4	0	30	30	87			0	67.0833
	35	4	4.66249	0.0023367	-0.00287741	0.820865	218.344	100.022	76.6636	0.219621								61734-35	CM-SS3	37	2013-08-13	3.01667	3459208000		Sanidine	26	Iain Mason		129.138.12.160	7.875	H2 Baseline = A @ 8/14/13 11:22 AM @ argonlab; H1 Baseline = A @ 8/14/13 11:22 AM @ argonlab; AX Baseline = A @ 8/14/13 11:22 AM @ argonlab; L1 Baseline = A @ 8/14/13 11:22 AM @ argonlab; L2 Baseline = A @ 8/14/13 11:22 AM @ argonlab; CDD Baseline = A @ 8/14/13 11:22 AM @ argonlab; Ar41 = A @ 8/14/13 11:22 AM @ argonlab; Ar40 = P @ 8/14/13 11:22 AM @ argonlab; Ar39 = P @ 8/14/13 11:22 AM @ argonl…	Hole 26 (80-100 Mesh)	APPLLPAAAAAA	1	Pychron Script	1	Fusions CO2	4	4	0	4	0	30	30	71			0	76.5457
	30	4	5.29782	0.0022891	1.093	0.863432	222.884	93.8455	81.6354	0.306111								61734-30	CM-SS3	37	2013-08-13	2.06667	3459204000		Sanidine	26	Iain Mason		129.138.12.160	7.875	H2 Baseline = A @ 8/14/13 11:22 AM @ argonlab; H1 Baseline = A @ 8/14/13 11:22 AM @ argonlab; AX Baseline = A @ 8/14/13 11:22 AM @ argonlab; L1 Baseline = A @ 8/14/13 11:22 AM @ argonlab; L2 Baseline = A @ 8/14/13 11:22 AM @ argonlab; CDD Baseline = A @ 8/14/13 11:22 AM @ argonlab; Ar41 = A @ 8/14/13 11:22 AM @ argonlab; Ar40 = P @ 8/14/13 11:22 AM @ argonlab; Ar39 = P @ 8/14/13 11:22 AM @ argonl…	Hole 26 (80-100 Mesh)	APPLLPAAAAAA	1	Pychron Script	1	Fusions CO2	4	4	0	4	0	30	30	66			0	91.4864
	01	4	6.12976	0.0101853	0.0517	0.693254	50.0922	99.7591	99.9222	0.263064								61734-01	CM-SS3	37	2013-08-12	19.8	3459182000		Sanidine	26	Iain Mason		129.138.12.160	7.875	H2 Baseline = A @ 8/14/13 11:22 AM @ argonlab; H1 Baseline = A @ 8/14/13 11:22 AM @ argonlab; AX Baseline = A @ 8/14/13 11:22 AM @ argonlab; L1 Baseline = A @ 8/14/13 11:22 AM @ argonlab; L2 Baseline = A @ 8/14/13 11:22 AM @ argonlab; CDD Baseline = A @ 8/14/13 11:22 AM @ argonlab; Ar41 = A @ 8/14/13 11:22 AM @ argonlab; Ar40 = P @ 8/14/13 11:22 AM @ argonlab; Ar39 = P @ 8/14/13 11:22 AM @ argonl…	Hole 26 (80-100 Mesh)	APPLLPAAAAAA	1	Pychron Script	1	Fusions CO2	4	4	0	4	0	30	30	37			0	84.9901
	47	4	6.89311	0.0098518	0.0498	1.48185	51.7879	99.7977	112.049	0.156897								61734-47	CM-SS3	37	2013-08-13	5.78333	3459218000		Sanidine	26	Iain Mason		129.138.12.160	7.875	H2 Baseline = A @ 8/14/13 11:23 AM @ argonlab; H1 Baseline = A @ 8/14/13 11:23 AM @ argonlab; AX Baseline = A @ 8/14/13 11:23 AM @ argonlab; L1 Baseline = A @ 8/14/13 11:23 AM @ argonlab; L2 Baseline = A @ 8/14/13 11:23 AM @ argonlab; CDD Baseline = A @ 8/14/13 11:23 AM @ argonlab; Ar41 = A @ 8/14/13 11:23 AM @ argonlab; Ar40 = P @ 8/14/13 11:23 AM @ argonlab; Ar39 = P @ 8/14/13 11:23 AM @ argonl…	Hole 26 (80-100 Mesh)	APPLLPAAAAAA	1	Pychron Script	1	Fusions CO2	4	4	0	4	0	30	30	83			0	204.292
	27	4	8.49955	0.0007193	0.2694	3.24679	709.306	99.0567	136.25	0.103939								61734-27	CM-SS3	37	2013-08-13	1.75	3459203000		Sanidine	26	Iain Mason		129.138.12.160	7.875	H2 Baseline = A @ 8/14/13 11:22 AM @ argonlab; H1 Baseline = A @ 8/14/13 11:22 AM @ argonlab; AX Baseline = A @ 8/14/13 11:22 AM @ argonlab; L1 Baseline = A @ 8/14/13 11:22 AM @ argonlab; L2 Baseline = A @ 8/14/13 11:22 AM @ argonlab; CDD Baseline = A @ 8/14/13 11:22 AM @ argonlab; Ar41 = A @ 8/14/13 11:22 AM @ argonlab; Ar40 = P @ 8/14/13 11:22 AM @ argonlab; Ar39 = P @ 8/14/13 11:22 AM @ argonl…	Hole 26 (80-100 Mesh)	APPLLPAAAAAA	1	Pychron Script	1	Fusions CO2	4	4	0	4	0	30	30	63			0	551.926
	14	4	10.0715	0.0130405	0.197	1.05342	39.1246	99.4256	160.968	0.258925								61734-14	CM-SS3	37	2013-08-12	22.6667	3459192000		Sanidine	26	Iain Mason		129.138.12.160	7.875	H2 Baseline = A @ 8/14/13 11:22 AM @ argonlab; H1 Baseline = A @ 8/14/13 11:22 AM @ argonlab; AX Baseline = A @ 8/14/13 11:22 AM @ argonlab; L1 Baseline = A @ 8/14/13 11:22 AM @ argonlab; L2 Baseline = A @ 8/14/13 11:22 AM @ argonlab; CDD Baseline = A @ 8/14/13 11:22 AM @ argonlab; Ar41 = A @ 8/14/13 11:22 AM @ argonlab; Ar40 = P @ 8/14/13 11:22 AM @ argonlab; Ar39 = P @ 8/14/13 11:22 AM @ argonl…	Hole 26 (80-100 Mesh)	APPLLPAAAAAA	1	Pychron Script	1	Fusions CO2	4	4	0	4	0	30	30	50			0	212.192
	52	4	12.1182	-0.0026943	0.13	3.05679	-	99.679	192.504	0.139854								61734-52	CM-SS3	37	2013-08-13	6.53333	3459220000		Sanidine	26	Iain Mason		129.138.12.160	7.875	H2 Baseline = A @ 8/14/13 11:23 AM @ argonlab; H1 Baseline = A @ 8/14/13 11:23 AM @ argonlab; AX Baseline = A @ 8/14/13 11:23 AM @ argonlab; L1 Baseline = A @ 8/14/13 11:23 AM @ argonlab; L2 Baseline = A @ 8/14/13 11:23 AM @ argonlab; CDD Baseline = A @ 8/14/13 11:23 AM @ argonlab; Ar41 = A @ 8/14/13 11:23 AM @ argonlab; Ar40 = P @ 8/14/13 11:23 AM @ argonlab; Ar39 = P @ 8/14/13 11:23 AM @ argonl…	Hole 26 (80-100 Mesh)	APPLLPAAAAAA	1	Pychron Script	1	Fusions CO2	4	4	0	4	0	30	30	88			0	740.852
	05	4	13.309	-0.006482	1.0794	1.26489	-	97.5771	206.187	0.344258								61734-05	CM-SS3	37	2013-08-12	20.6667	3459185000		Sanidine	26	Iain Mason		129.138.12.160	7.875	H2 Baseline = A @ 8/14/13 11:22 AM @ argonlab; H1 Baseline = A @ 8/14/13 11:22 AM @ argonlab; AX Baseline = A @ 8/14/13 11:22 AM @ argonlab; L1 Baseline = A @ 8/14/13 11:22 AM @ argonlab; L2 Baseline = A @ 8/14/13 11:22 AM @ argonlab; CDD Baseline = A @ 8/14/13 11:22 AM @ argonlab; Ar41 = A @ 8/14/13 11:22 AM @ argonlab; Ar40 = P @ 8/14/13 11:22 AM @ argonlab; Ar39 = P @ 8/14/13 11:22 AM @ argonl…	Hole 26 (80-100 Mesh)	APPLLPAAAAAA	1	Pychron Script	1	Fusions CO2	4	4	0	4	0	30	30	41			0	336.686
	23	4	13.4029	-0.0377412	0.2639	0.492293	-	99.3919	211.205	0.582742								61734-23	CM-SS3	37	2013-08-13	0.9	3459200000		Sanidine	26	Iain Mason		129.138.12.160	7.875	H2 Baseline = A @ 8/14/13 11:22 AM @ argonlab; H1 Baseline = A @ 8/14/13 11:22 AM @ argonlab; AX Baseline = A @ 8/14/13 11:22 AM @ argonlab; L1 Baseline = A @ 8/14/13 11:22 AM @ argonlab; L2 Baseline = A @ 8/14/13 11:22 AM @ argonlab; CDD Baseline = A @ 8/14/13 11:22 AM @ argonlab; Ar41 = A @ 8/14/13 11:22 AM @ argonlab; Ar40 = P @ 8/14/13 11:22 AM @ argonlab; Ar39 = P @ 8/14/13 11:22 AM @ argonl…	Hole 26 (80-100 Mesh)	APPLLPAAAAAA	1	Pychron Script	1	Fusions CO2	4	4	0	4	0	30	30	59			0	131.96
	33	4	14.5005	-0.007936	0.0912	0.996844	-	99.8084	228.377	0.386901								61734-33	CM-SS3	37	2013-08-13	2.81667	3459207000		Sanidine	26	Iain Mason		129.138.12.160	7.875	H2 Baseline = A @ 8/14/13 11:22 AM @ argonlab; H1 Baseline = A @ 8/14/13 11:22 AM @ argonlab; AX Baseline = A @ 8/14/13 11:22 AM @ argonlab; L1 Baseline = A @ 8/14/13 11:22 AM @ argonlab; L2 Baseline = A @ 8/14/13 11:22 AM @ argonlab; CDD Baseline = A @ 8/14/13 11:22 AM @ argonlab; Ar41 = A @ 8/14/13 11:22 AM @ argonlab; Ar40 = P @ 8/14/13 11:22 AM @ argonlab; Ar39 = P @ 8/14/13 11:22 AM @ argonl…	Hole 26 (80-100 Mesh)	APPLLPAAAAAA	1	Pychron Script	1	Fusions CO2	4	4	0	4	0	30	30	69			0	289.093
	32	4	14.801	-0.0052747	0.1381	0.886006	-	99.7185	232.627	0.396112								61734-32	CM-SS3	37	2013-08-13	2.5	3459206000		Sanidine	26	Iain Mason		129.138.12.160	7.875	H2 Baseline = A @ 8/14/13 11:22 AM @ argonlab; H1 Baseline = A @ 8/14/13 11:22 AM @ argonlab; AX Baseline = A @ 8/14/13 11:22 AM @ argonlab; L1 Baseline = A @ 8/14/13 11:22 AM @ argonlab; L2 Baseline = A @ 8/14/13 11:22 AM @ argonlab; CDD Baseline = A @ 8/14/13 11:22 AM @ argonlab; Ar41 = A @ 8/14/13 11:22 AM @ argonlab; Ar40 = P @ 8/14/13 11:22 AM @ argonlab; Ar39 = P @ 8/14/13 11:22 AM @ argonl…	Hole 26 (80-100 Mesh)	APPLLPAAAAAA	1	Pychron Script	1	Fusions CO2	4	4	0	4	0	30	30	68			0	262.275
	28	4	16.1726	0.0241441	0.0666	0.907763	21.1316	99.8888	253.178	0.466394								61734-28	CM-SS3	37	2013-08-13	1.85	3459203000		Sanidine	26	Iain Mason		129.138.12.160	7.875	H2 Baseline = A @ 8/14/13 11:22 AM @ argonlab; H1 Baseline = A @ 8/14/13 11:22 AM @ argonlab; AX Baseline = A @ 8/14/13 11:22 AM @ argonlab; L1 Baseline = A @ 8/14/13 11:22 AM @ argonlab; L2 Baseline = A @ 8/14/13 11:22 AM @ argonlab; CDD Baseline = A @ 8/14/13 11:22 AM @ argonlab; Ar41 = A @ 8/14/13 11:22 AM @ argonlab; Ar40 = P @ 8/14/13 11:22 AM @ argonlab; Ar39 = P @ 8/14/13 11:22 AM @ argonl…	Hole 26 (80-100 Mesh)	APPLLPAAAAAA	1	Pychron Script	1	Fusions CO2	4	4	0	4	0	30	30	64			0	293.622
	12	4	16.3985	0.0044819	0.075	0.965815	113.837	99.8662	256.423	0.432327								61734-12	CM-SS3	37	2013-08-12	22.25	3459190000		Sanidine	26	Iain Mason		129.138.12.160	7.875	H2 Baseline = A @ 8/14/13 11:22 AM @ argonlab; H1 Baseline = A @ 8/14/13 11:22 AM @ argonlab; AX Baseline = A @ 8/14/13 11:22 AM @ argonlab; L1 Baseline = A @ 8/14/13 11:22 AM @ argonlab; L2 Baseline = A @ 8/14/13 11:22 AM @ argonlab; CDD Baseline = A @ 8/14/13 11:22 AM @ argonlab; Ar41 = A @ 8/14/13 11:22 AM @ argonlab; Ar40 = P @ 8/14/13 11:22 AM @ argonlab; Ar39 = P @ 8/14/13 11:22 AM @ argonl…	Hole 26 (80-100 Mesh)	APPLLPAAAAAA	1	Pychron Script	1	Fusions CO2	4	4	0	4	0	30	30	48			0	316.76
	31	4	19.775	0.0227867	0.3688	0.640196	22.3904	99.4534	303.9	0.77375								61734-31	CM-SS3	37	2013-08-13	2.38333	3459205000		Sanidine	26	Iain Mason		129.138.12.160	7.875	H2 Baseline = A @ 8/14/13 11:22 AM @ argonlab; H1 Baseline = A @ 8/14/13 11:22 AM @ argonlab; AX Baseline = A @ 8/14/13 11:22 AM @ argonlab; L1 Baseline = A @ 8/14/13 11:22 AM @ argonlab; L2 Baseline = A @ 8/14/13 11:22 AM @ argonlab; CDD Baseline = A @ 8/14/13 11:22 AM @ argonlab; Ar41 = A @ 8/14/13 11:22 AM @ argonlab; Ar40 = P @ 8/14/13 11:22 AM @ argonlab; Ar39 = P @ 8/14/13 11:22 AM @ argonl…	Hole 26 (80-100 Mesh)	APPLLPAAAAAA	1	Pychron Script	1	Fusions CO2	4	4	0	4	0	30	30	67			0	253.201
	60	4	22.2794	-0.0092585	0.1171	1.15412	-	99.8406	340.235	0.435885								61734-60	CM-SS3	37	2013-08-13	8.23333	3459226000		Sanidine	26	Iain Mason		129.138.12.160	7.875	H2 Baseline = A @ 8/14/13 11:22 AM @ argonlab; H1 Baseline = A @ 8/14/13 11:22 AM @ argonlab; AX Baseline = A @ 8/14/13 11:22 AM @ argonlab; L1 Baseline = A @ 8/14/13 11:22 AM @ argonlab; L2 Baseline = A @ 8/14/13 11:22 AM @ argonlab; CDD Baseline = A @ 8/14/13 11:22 AM @ argonlab; Ar41 = A @ 8/14/13 11:22 AM @ argonlab; Ar40 = P @ 8/14/13 11:22 AM @ argonlab; Ar39 = P @ 8/14/13 11:22 AM @ argonl…	Hole 26 (80-100 Mesh)	APPLLPAAAAAA	1	Pychron Script	1	Fusions CO2	4	4	0	4	0	30	30	96			0	514.258
	04	4	22.3652	0.0146599	0.0477	0.536859	34.8027	99.941	341.749	0.869568								61734-04	CM-SS3	37	2013-08-12	20.5667	3459184000		Sanidine	26	Iain Mason		129.138.12.160	7.875	H2 Baseline = A @ 8/14/13 11:22 AM @ argonlab; H1 Baseline = A @ 8/14/13 11:22 AM @ argonlab; AX Baseline = A @ 8/14/13 11:22 AM @ argonlab; L1 Baseline = A @ 8/14/13 11:22 AM @ argonlab; L2 Baseline = A @ 8/14/13 11:22 AM @ argonlab; CDD Baseline = A @ 8/14/13 11:22 AM @ argonlab; Ar41 = A @ 8/14/13 11:22 AM @ argonlab; Ar40 = P @ 8/14/13 11:22 AM @ argonlab; Ar39 = P @ 8/14/13 11:22 AM @ argonl…	Hole 26 (80-100 Mesh)	APPLLPAAAAAA	1	Pychron Script	1	Fusions CO2	4	4	0	4	0	30	30	40			0	240.141
	18	4	23.2601	0.0043792	0.0581	1.23539	116.506	99.927	354.137	0.42259								61734-18	CM-SS3	37	2013-08-12	23.7333	3459196000		Sanidine	26	Iain Mason		129.138.12.160	7.875	H2 Baseline = A @ 8/14/13 11:22 AM @ argonlab; H1 Baseline = A @ 8/14/13 11:22 AM @ argonlab; AX Baseline = A @ 8/14/13 11:22 AM @ argonlab; L1 Baseline = A @ 8/14/13 11:22 AM @ argonlab; L2 Baseline = A @ 8/14/13 11:22 AM @ argonlab; CDD Baseline = A @ 8/14/13 11:22 AM @ argonlab; Ar41 = A @ 8/14/13 11:22 AM @ argonlab; Ar40 = P @ 8/14/13 11:22 AM @ argonlab; Ar39 = P @ 8/14/13 11:22 AM @ argonl…	Hole 26 (80-100 Mesh)	APPLLPAAAAAA	1	Pychron Script	1	Fusions CO2	4	4	0	4	0	30	30	54			0	574.708
	49	4	24.8416	0.0230675	-0.037	0.774941	22.1179	100.052	376.336	0.635861								61734-49	CM-SS3	37	2013-08-13	5.98333	3459218000		Sanidine	26	Iain Mason		129.138.12.160	7.875	H2 Baseline = A @ 8/14/13 11:23 AM @ argonlab; H1 Baseline = A @ 8/14/13 11:23 AM @ argonlab; AX Baseline = A @ 8/14/13 11:23 AM @ argonlab; L1 Baseline = A @ 8/14/13 11:23 AM @ argonlab; L2 Baseline = A @ 8/14/13 11:23 AM @ argonlab; CDD Baseline = A @ 8/14/13 11:23 AM @ argonlab; Ar41 = A @ 8/14/13 11:23 AM @ argonlab; Ar40 = P @ 8/14/13 11:23 AM @ argonlab; Ar39 = P @ 8/14/13 11:23 AM @ argonl…	Hole 26 (80-100 Mesh)	APPLLPAAAAAA	1	Pychron Script	1	Fusions CO2	4	4	0	4	0	30	30	85			0	385.022
	26	4	24.9683	0.0041946	0.2134	1.14906	121.634	99.7465	377.024	0.497116								61734-26	CM-SS3	37	2013-08-13	1.65	3459203000		Sanidine	26	Iain Mason		129.138.12.160	7.875	H2 Baseline = A @ 8/14/13 11:22 AM @ argonlab; H1 Baseline = A @ 8/14/13 11:22 AM @ argonlab; AX Baseline = A @ 8/14/13 11:22 AM @ argonlab; L1 Baseline = A @ 8/14/13 11:22 AM @ argonlab; L2 Baseline = A @ 8/14/13 11:22 AM @ argonlab; CDD Baseline = A @ 8/14/13 11:22 AM @ argonlab; Ar41 = A @ 8/14/13 11:22 AM @ argonlab; Ar40 = P @ 8/14/13 11:22 AM @ argonlab; Ar39 = P @ 8/14/13 11:22 AM @ argonl…	Hole 26 (80-100 Mesh)	APPLLPAAAAAA	1	Pychron Script	1	Fusions CO2	4	4	0	4	0	30	30	62			0	573.802
	16	4	27.0672	0.0104196	0.164	0.705422	48.9658	99.8223	405.731	0.750584								61734-16	CM-SS3	37	2013-08-12	23.3	3459194000		Sanidine	26	Iain Mason		129.138.12.160	7.875	H2 Baseline = A @ 8/14/13 11:22 AM @ argonlab; H1 Baseline = A @ 8/14/13 11:22 AM @ argonlab; AX Baseline = A @ 8/14/13 11:22 AM @ argonlab; L1 Baseline = A @ 8/14/13 11:22 AM @ argonlab; L2 Baseline = A @ 8/14/13 11:22 AM @ argonlab; CDD Baseline = A @ 8/14/13 11:22 AM @ argonlab; Ar41 = A @ 8/14/13 11:22 AM @ argonlab; Ar40 = P @ 8/14/13 11:22 AM @ argonlab; Ar39 = P @ 8/14/13 11:22 AM @ argonl…	Hole 26 (80-100 Mesh)	APPLLPAAAAAA	1	Pychron Script	1	Fusions CO2	4	4	0	4	0	30	30	52			0	381.879
	09	4	27.6695	0.0127239	0.1551	1.51455	40.0981	99.837	413.868	0.40757								61734-09	CM-SS3	37	2013-08-12	21.35	3459187000		Sanidine	26	Iain Mason		129.138.12.160	7.875	H2 Baseline = A @ 8/14/13 11:22 AM @ argonlab; H1 Baseline = A @ 8/14/13 11:22 AM @ argonlab; AX Baseline = A @ 8/14/13 11:22 AM @ argonlab; L1 Baseline = A @ 8/14/13 11:22 AM @ argonlab; L2 Baseline = A @ 8/14/13 11:22 AM @ argonlab; CDD Baseline = A @ 8/14/13 11:22 AM @ argonlab; Ar41 = A @ 8/14/13 11:22 AM @ argonlab; Ar40 = P @ 8/14/13 11:22 AM @ argonlab; Ar39 = P @ 8/14/13 11:22 AM @ argonl…	Hole 26 (80-100 Mesh)	APPLLPAAAAAA	1	Pychron Script	1	Fusions CO2	4	4	0	4	0	30	30	45			0	838.142
	37	4	27.8581	-0.0014615	0.0287	3.91961	-	99.9693	416.882	0.202739								61734-37	CM-SS3	37	2013-08-13	3.88333	3459211000		Sanidine	26	Iain Mason		129.138.12.160	7.875	H2 Baseline = A @ 8/14/13 11:23 AM @ argonlab; H1 Baseline = A @ 8/14/13 11:23 AM @ argonlab; AX Baseline = A @ 8/14/13 11:23 AM @ argonlab; L1 Baseline = A @ 8/14/13 11:23 AM @ argonlab; L2 Baseline = A @ 8/14/13 11:23 AM @ argonlab; CDD Baseline = A @ 8/14/13 11:23 AM @ argonlab; Ar41 = A @ 8/14/13 11:23 AM @ argonlab; Ar40 = P @ 8/14/13 11:23 AM @ argonlab; Ar39 = P @ 8/14/13 11:23 AM @ argonl…	Hole 26 (80-100 Mesh)	APPLLPAAAAAA	1	Pychron Script	1	Fusions CO2	4	4	0	4	0	30	30	73			0	2183.86
	38	4	32.1931	0.0081914	0.0305	1.18273	62.2853	99.9742	474.035	0.494144								61734-38	CM-SS3	37	2013-08-13	3.98333	3459211000		Sanidine	26	Iain Mason		129.138.12.160	7.875	H2 Baseline = A @ 8/14/13 11:23 AM @ argonlab; H1 Baseline = A @ 8/14/13 11:23 AM @ argonlab; AX Baseline = A @ 8/14/13 11:23 AM @ argonlab; L1 Baseline = A @ 8/14/13 11:23 AM @ argonlab; L2 Baseline = A @ 8/14/13 11:23 AM @ argonlab; CDD Baseline = A @ 8/14/13 11:23 AM @ argonlab; Ar41 = A @ 8/14/13 11:23 AM @ argonlab; Ar40 = P @ 8/14/13 11:23 AM @ argonlab; Ar39 = P @ 8/14/13 11:23 AM @ argonl…	Hole 26 (80-100 Mesh)	APPLLPAAAAAA	1	Pychron Script	1	Fusions CO2	4	4	0	4	0	30	30	74			0	761.518
	42	4	33.4216	0.0217089	0.1307	0.702241	23.5021	99.8882	489.54	0.968571								61734-42	CM-SS3	37	2013-08-13	4.61667	3459213000		Sanidine	26	Iain Mason		129.138.12.160	7.875	H2 Baseline = A @ 8/14/13 11:23 AM @ argonlab; H1 Baseline = A @ 8/14/13 11:23 AM @ argonlab; AX Baseline = A @ 8/14/13 11:23 AM @ argonlab; L1 Baseline = A @ 8/14/13 11:23 AM @ argonlab; L2 Baseline = A @ 8/14/13 11:23 AM @ argonlab; CDD Baseline = A @ 8/14/13 11:23 AM @ argonlab; Ar41 = A @ 8/14/13 11:23 AM @ argonlab; Ar40 = P @ 8/14/13 11:23 AM @ argonlab; Ar39 = P @ 8/14/13 11:23 AM @ argonl…	Hole 26 (80-100 Mesh)	APPLLPAAAAAA	1	Pychron Script	1	Fusions CO2	4	4	0	4	0	30	30	78			0	469.407
	43	4	33.6626	-0.0022323	0.041	0.69913	-	99.9626	492.95	0.974109								61734-43	CM-SS3	37	2013-08-13	4.71667	3459214000		Sanidine	26	Iain Mason		129.138.12.160	7.875	H2 Baseline = A @ 8/14/13 11:23 AM @ argonlab; H1 Baseline = A @ 8/14/13 11:23 AM @ argonlab; AX Baseline = A @ 8/14/13 11:23 AM @ argonlab; L1 Baseline = A @ 8/14/13 11:23 AM @ argonlab; L2 Baseline = A @ 8/14/13 11:23 AM @ argonlab; CDD Baseline = A @ 8/14/13 11:23 AM @ argonlab; Ar41 = A @ 8/14/13 11:23 AM @ argonlab; Ar40 = P @ 8/14/13 11:23 AM @ argonlab; Ar39 = P @ 8/14/13 11:23 AM @ argonl…	Hole 26 (80-100 Mesh)	APPLLPAAAAAA	1	Pychron Script	1	Fusions CO2	4	4	0	4	0	30	30	79			0	470.69
	07	4	38.6742	0.0064804	0.0639	2.25984	78.7303	99.9522	556.15	0.328497								61734-07	CM-SS3	37	2013-08-12	21.15	3459187000		Sanidine	26	Iain Mason		129.138.12.160	7.875	H2 Baseline = A @ 8/14/13 11:22 AM @ argonlab; H1 Baseline = A @ 8/14/13 11:22 AM @ argonlab; AX Baseline = A @ 8/14/13 11:22 AM @ argonlab; L1 Baseline = A @ 8/14/13 11:22 AM @ argonlab; L2 Baseline = A @ 8/14/13 11:22 AM @ argonlab; CDD Baseline = A @ 8/14/13 11:22 AM @ argonlab; Ar41 = A @ 8/14/13 11:22 AM @ argonlab; Ar40 = P @ 8/14/13 11:22 AM @ argonlab; Ar39 = P @ 8/14/13 11:22 AM @ argonl…	Hole 26 (80-100 Mesh)	APPLLPAAAAAA	1	Pychron Script	1	Fusions CO2	4	4	0	4	0	30	30	43			0	1747.95
	25	4	51.4309	0.0035218	0.0143	2.41352	144.87	99.9925	708.146	0.423265								61734-25	CM-SS3	37	2013-08-13	1.33333	3459202000		Sanidine	26	Iain Mason		129.138.12.160	7.875	H2 Baseline = A @ 8/14/13 11:22 AM @ argonlab; H1 Baseline = A @ 8/14/13 11:22 AM @ argonlab; AX Baseline = A @ 8/14/13 11:22 AM @ argonlab; L1 Baseline = A @ 8/14/13 11:22 AM @ argonlab; L2 Baseline = A @ 8/14/13 11:22 AM @ argonlab; CDD Baseline = A @ 8/14/13 11:22 AM @ argonlab; Ar41 = A @ 8/14/13 11:22 AM @ argonlab; Ar40 = P @ 8/14/13 11:22 AM @ argonlab; Ar39 = P @ 8/14/13 11:22 AM @ argonl…	Hole 26 (80-100 Mesh)	APPLLPAAAAAA	1	Pychron Script	1	Fusions CO2	4	4	0	4	0	30	30	61			0	2482.59
	48	4	53.0082	0.0163653	-0.033	0.780158	31.176	100.021	726.246	1.24196								61734-48	CM-SS3	37	2013-08-13	5.88333	3459218000		Sanidine	26	Iain Mason		129.138.12.160	7.875	H2 Baseline = A @ 8/14/13 11:23 AM @ argonlab; H1 Baseline = A @ 8/14/13 11:23 AM @ argonlab; AX Baseline = A @ 8/14/13 11:23 AM @ argonlab; L1 Baseline = A @ 8/14/13 11:23 AM @ argonlab; L2 Baseline = A @ 8/14/13 11:23 AM @ argonlab; CDD Baseline = A @ 8/14/13 11:23 AM @ argonlab; Ar41 = A @ 8/14/13 11:23 AM @ argonlab; Ar40 = P @ 8/14/13 11:23 AM @ argonlab; Ar39 = P @ 8/14/13 11:23 AM @ argonl…	Hole 26 (80-100 Mesh)	APPLLPAAAAAA	1	Pychron Script	1	Fusions CO2	4	4	0	4	0	30	30	84			0	827.104
	11	4	53.3741	0.0105666	0.7205	0.615775	48.2846	99.5995	727.838	1.48891								61734-11	CM-SS3	37	2013-08-12	22	3459190000		Sanidine	26	Iain Mason		129.138.12.160	7.875	H2 Baseline = A @ 8/14/13 11:22 AM @ argonlab; H1 Baseline = A @ 8/14/13 11:22 AM @ argonlab; AX Baseline = A @ 8/14/13 11:22 AM @ argonlab; L1 Baseline = A @ 8/14/13 11:22 AM @ argonlab; L2 Baseline = A @ 8/14/13 11:22 AM @ argonlab; CDD Baseline = A @ 8/14/13 11:22 AM @ argonlab; Ar41 = A @ 8/14/13 11:22 AM @ argonlab; Ar40 = P @ 8/14/13 11:22 AM @ argonlab; Ar39 = P @ 8/14/13 11:22 AM @ argonl…	Hole 26 (80-100 Mesh)	APPLLPAAAAAA	1	Pychron Script	1	Fusions CO2	4	4	0	4	0	30	30	47			0	657.333
	24	4	55.2094	0.0108653	0.00580895	0.873114	46.9572	99.9983	750.835	1.10847								61734-24	CM-SS3	37	2013-08-13	1.21667	3459201000		Sanidine	26	Iain Mason		129.138.12.160	7.875	H2 Baseline = A @ 8/14/13 11:22 AM @ argonlab; H1 Baseline = A @ 8/14/13 11:22 AM @ argonlab; AX Baseline = A @ 8/14/13 11:22 AM @ argonlab; L1 Baseline = A @ 8/14/13 11:22 AM @ argonlab; L2 Baseline = A @ 8/14/13 11:22 AM @ argonlab; CDD Baseline = A @ 8/14/13 11:22 AM @ argonlab; Ar41 = A @ 8/14/13 11:22 AM @ argonlab; Ar40 = P @ 8/14/13 11:22 AM @ argonlab; Ar39 = P @ 8/14/13 11:22 AM @ argonl…	Hole 26 (80-100 Mesh)	APPLLPAAAAAA	1	Pychron Script	1	Fusions CO2	4	4	0	4	0	30	30	60			0	964.089
	10	4	60.0807	0.0038061	0.1575	2.06935	134.049	99.9223	803.896	0.698833								61734-10	CM-SS3	37	2013-08-12	21.45	3459188000		Sanidine	26	Iain Mason		129.138.12.160	7.875	H2 Baseline = A @ 8/14/13 11:22 AM @ argonlab; H1 Baseline = A @ 8/14/13 11:22 AM @ argonlab; AX Baseline = A @ 8/14/13 11:22 AM @ argonlab; L1 Baseline = A @ 8/14/13 11:22 AM @ argonlab; L2 Baseline = A @ 8/14/13 11:22 AM @ argonlab; CDD Baseline = A @ 8/14/13 11:22 AM @ argonlab; Ar41 = A @ 8/14/13 11:22 AM @ argonlab; Ar40 = P @ 8/14/13 11:22 AM @ argonlab; Ar39 = P @ 8/14/13 11:22 AM @ argonl…	Hole 26 (80-100 Mesh)	APPLLPAAAAAA	1	Pychron Script	1	Fusions CO2	4	4	0	4	0	30	30	46			0	2486.56
	50	4	64.3483	-0.005926	0.1808	0.755478	-	99.9155	849.491	1.31845								61734-50	CM-SS3	37	2013-08-13	6.1	3459219000		Sanidine	26	Iain Mason		129.138.12.160	7.875	H2 Baseline = A @ 8/14/13 11:23 AM @ argonlab; H1 Baseline = A @ 8/14/13 11:23 AM @ argonlab; AX Baseline = A @ 8/14/13 11:23 AM @ argonlab; L1 Baseline = A @ 8/14/13 11:23 AM @ argonlab; L2 Baseline = A @ 8/14/13 11:23 AM @ argonlab; CDD Baseline = A @ 8/14/13 11:23 AM @ argonlab; Ar41 = A @ 8/14/13 11:23 AM @ argonlab; Ar40 = P @ 8/14/13 11:23 AM @ argonlab; Ar39 = P @ 8/14/13 11:23 AM @ argonl…	Hole 26 (80-100 Mesh)	APPLLPAAAAAA	1	Pychron Script	1	Fusions CO2	4	4	0	4	0	30	30	86			0	972.271
	21	4	70.1451	0.0044738	0.1391	2.3795	114.043	99.9416	909.914	0.595082								61734-21	CM-SS3	37	2013-08-13	0.266667	3459198000		Sanidine	26	Iain Mason		129.138.12.160	7.875	H2 Baseline = A @ 8/14/13 11:22 AM @ argonlab; H1 Baseline = A @ 8/14/13 11:22 AM @ argonlab; AX Baseline = A @ 8/14/13 11:22 AM @ argonlab; L1 Baseline = A @ 8/14/13 11:22 AM @ argonlab; L2 Baseline = A @ 8/14/13 11:22 AM @ argonlab; CDD Baseline = A @ 8/14/13 11:22 AM @ argonlab; Ar41 = A @ 8/14/13 11:22 AM @ argonlab; Ar40 = P @ 8/14/13 11:22 AM @ argonlab; Ar39 = P @ 8/14/13 11:22 AM @ argonl…	Hole 26 (80-100 Mesh)	APPLLPAAAAAA	1	Pychron Script	1	Fusions CO2	4	4	0	4	0	30	30	57			0	3338.21
	20	4	70.4634	0.0070822	0.0692	1.62541	72.0403	99.9715	913.38	0.75841								61734-20	CM-SS3	37	2013-08-13	0.15	3459197000		Sanidine	26	Iain Mason		129.138.12.160	7.875	H2 Baseline = A @ 8/14/13 11:22 AM @ argonlab; H1 Baseline = A @ 8/14/13 11:22 AM @ argonlab; AX Baseline = A @ 8/14/13 11:22 AM @ argonlab; L1 Baseline = A @ 8/14/13 11:22 AM @ argonlab; L2 Baseline = A @ 8/14/13 11:22 AM @ argonlab; CDD Baseline = A @ 8/14/13 11:22 AM @ argonlab; Ar41 = A @ 8/14/13 11:22 AM @ argonlab; Ar40 = P @ 8/14/13 11:22 AM @ argonlab; Ar39 = P @ 8/14/13 11:22 AM @ argonl…	Hole 26 (80-100 Mesh)	APPLLPAAAAAA	1	Pychron Script	1	Fusions CO2	4	4	0	4	0	30	30	56			0	2290.65
	46	4	71.6861	-0.0077365	0.4735	1.18802	-	99.8026	924.583	0.900132								61734-46	CM-SS3	37	2013-08-13	5.68333	3459217000		Sanidine	26	Iain Mason		129.138.12.160	7.875	H2 Baseline = A @ 8/14/13 11:23 AM @ argonlab; H1 Baseline = A @ 8/14/13 11:23 AM @ argonlab; AX Baseline = A @ 8/14/13 11:23 AM @ argonlab; L1 Baseline = A @ 8/14/13 11:23 AM @ argonlab; L2 Baseline = A @ 8/14/13 11:23 AM @ argonlab; CDD Baseline = A @ 8/14/13 11:23 AM @ argonlab; Ar41 = A @ 8/14/13 11:23 AM @ argonlab; Ar40 = P @ 8/14/13 11:23 AM @ argonlab; Ar39 = P @ 8/14/13 11:23 AM @ argonl…	Hole 26 (80-100 Mesh)	APPLLPAAAAAA	1	Pychron Script	1	Fusions CO2	4	4	0	4	0	30	30	82			0	1703.29
	56	4	71.9489	0.159054	0.5456	0.0567361	3.20773	99.7925	927.248	16.7839								61734-56	CM-SS3	37	2013-08-13	7.58333	3459224000		Sanidine	26	Iain Mason		129.138.12.160	7.875	H2 Baseline = A @ 8/14/13 11:23 AM @ argonlab; H1 Baseline = A @ 8/14/13 11:23 AM @ argonlab; AX Baseline = A @ 8/14/13 11:23 AM @ argonlab; L1 Baseline = A @ 8/14/13 11:23 AM @ argonlab; L2 Baseline = A @ 8/14/13 11:23 AM @ argonlab; CDD Baseline = A @ 8/14/13 11:23 AM @ argonlab; Ar41 = A @ 8/14/13 11:23 AM @ argonlab; Ar40 = P @ 8/14/13 11:23 AM @ argonlab; Ar39 = P @ 8/14/13 11:23 AM @ argonl…	Hole 26 (80-100 Mesh)	APPLLPAAAAAA	1	Pychron Script	1	Fusions CO2	4	4	0	4	0	30	30	92			0	81.6504
	29	4	81.7387	0.0086779	0.0453	1.98413	58.7935	99.9845	1025.09	0.66042								61734-29	CM-SS3	37	2013-08-13	1.95	3459204000		Sanidine	26	Iain Mason		129.138.12.160	7.875	H2 Baseline = A @ 8/14/13 11:22 AM @ argonlab; H1 Baseline = A @ 8/14/13 11:22 AM @ argonlab; AX Baseline = A @ 8/14/13 11:22 AM @ argonlab; L1 Baseline = A @ 8/14/13 11:22 AM @ argonlab; L2 Baseline = A @ 8/14/13 11:22 AM @ argonlab; CDD Baseline = A @ 8/14/13 11:22 AM @ argonlab; Ar41 = A @ 8/14/13 11:22 AM @ argonlab; Ar40 = P @ 8/14/13 11:22 AM @ argonlab; Ar39 = P @ 8/14/13 11:22 AM @ argonl…	Hole 26 (80-100 Mesh)	APPLLPAAAAAA	1	Pychron Script	1	Fusions CO2	4	4	0	4	0	30	30	65			0	3243.62
	45	4	85.1345	-0.0089602	0.0365	1.2467	-	99.9865	1057.42	1.04055								61734-45	CM-SS3	37	2013-08-13	5.36667	3459216000		Sanidine	26	Iain Mason		129.138.12.160	7.875	H2 Baseline = A @ 8/14/13 11:23 AM @ argonlab; H1 Baseline = A @ 8/14/13 11:23 AM @ argonlab; AX Baseline = A @ 8/14/13 11:23 AM @ argonlab; L1 Baseline = A @ 8/14/13 11:23 AM @ argonlab; L2 Baseline = A @ 8/14/13 11:23 AM @ argonlab; CDD Baseline = A @ 8/14/13 11:23 AM @ argonlab; Ar41 = A @ 8/14/13 11:23 AM @ argonlab; Ar40 = P @ 8/14/13 11:23 AM @ argonlab; Ar39 = P @ 8/14/13 11:23 AM @ argonl…	Hole 26 (80-100 Mesh)	APPLLPAAAAAA	1	Pychron Script	1	Fusions CO2	4	4	0	4	0	30	30	81			0	2122.74
	59	4	87.7707	0.0014004	0.3082	0.537295	364.327	99.8954	1081.39	2.29437								61734-59	CM-SS3	37	2013-08-13	8.11667	3459226000		Sanidine	26	Iain Mason		129.138.12.160	7.875	H2 Baseline = A @ 8/14/13 11:22 AM @ argonlab; H1 Baseline = A @ 8/14/13 11:22 AM @ argonlab; AX Baseline = A @ 8/14/13 11:22 AM @ argonlab; L1 Baseline = A @ 8/14/13 11:22 AM @ argonlab; L2 Baseline = A @ 8/14/13 11:22 AM @ argonlab; CDD Baseline = A @ 8/14/13 11:22 AM @ argonlab; Ar41 = A @ 8/14/13 11:22 AM @ argonlab; Ar40 = P @ 8/14/13 11:22 AM @ argonlab; Ar39 = P @ 8/14/13 11:22 AM @ argonl…	Hole 26 (80-100 Mesh)	APPLLPAAAAAA	1	Pychron Script	1	Fusions CO2	4	4	0	4	0	30	30	95			0	943.176
	03	4	98.7128	-3.2274	26.9317	0.00467331	-	91.6272	1105.26	196.737								61734-03	CM-SS3	37	2013-08-12	20.2333	3459183000		Sanidine	26	Iain Mason		129.138.12.160	7.875	H2 Baseline = A @ 8/14/13 11:22 AM @ argonlab; H1 Baseline = A @ 8/14/13 11:22 AM @ argonlab; AX Baseline = A @ 8/14/13 11:22 AM @ argonlab; L1 Baseline = A @ 8/14/13 11:22 AM @ argonlab; L2 Baseline = A @ 8/14/13 11:22 AM @ argonlab; CDD Baseline = A @ 8/14/13 11:22 AM @ argonlab; Ar41 = A @ 8/14/13 11:22 AM @ argonlab; Ar40 = P @ 8/14/13 11:22 AM @ argonlab; Ar39 = P @ 8/14/13 11:22 AM @ argonl…	Hole 26 (80-100 Mesh)	APPLLPAAAAAA	1	Pychron Script	1	Fusions CO2	4	4	0	4	0	30	30	39			0	9.2069
	41	4	150.187	-0.0438318	0.0614	0.538116	-	99.9855	1586.71	2.6741								61734-41	CM-SS3	37	2013-08-13	4.51667	3459213000		Sanidine	26	Iain Mason		129.138.12.160	7.875	H2 Baseline = A @ 8/14/13 11:23 AM @ argonlab; H1 Baseline = A @ 8/14/13 11:23 AM @ argonlab; AX Baseline = A @ 8/14/13 11:23 AM @ argonlab; L1 Baseline = A @ 8/14/13 11:23 AM @ argonlab; L2 Baseline = A @ 8/14/13 11:23 AM @ argonlab; CDD Baseline = A @ 8/14/13 11:23 AM @ argonlab; Ar41 = A @ 8/14/13 11:23 AM @ argonlab; Ar40 = P @ 8/14/13 11:23 AM @ argonlab; Ar39 = P @ 8/14/13 11:23 AM @ argonl…	Hole 26 (80-100 Mesh)	APPLLPAAAAAA	1	Pychron Script	1	Fusions CO2	4	4	0	4	0	30	30	77			0	1616.31
	CM-SS3, Sanidine, J=0.0091634±0.02%, IC=1.05445±0.0011591, NM-258C, Lab#=61735, Argus VI
X	34	4	3.99852	0.003874	0.0127	0.702236	131.7	99.9112	65.6908	0.0810402								61735-34	CM-SS3	37	2013-08-13	14.7167	3459250000		Sanidine	27	Iain Mason		129.138.12.160	7.875	H2 Baseline = A @ 8/14/13 11:22 AM @ argonlab; H1 Baseline = A @ 8/14/13 11:22 AM @ argonlab; AX Baseline = A @ 8/14/13 11:22 AM @ argonlab; L1 Baseline = A @ 8/14/13 11:22 AM @ argonlab; L2 Baseline = A @ 8/14/13 11:22 AM @ argonlab; CDD Baseline = A @ 8/14/13 11:22 AM @ argonlab; Ar41 = A @ 8/14/13 11:22 AM @ argonlab; Ar40 = P @ 8/14/13 11:22 AM @ argonlab; Ar39 = P @ 8/14/13 11:22 AM @ argonl…	Hole 28 (80-100 Mesh)	APPLLPAAAAAA	1	Pychron Script	1	Fusions CO2	4	4	0	4	0	30	30	131			0	56.1582
	28	4	4.14071	0.0143952	0.0273	0.641005	35.4426	99.8312	67.9355	0.089932								61735-28	CM-SS3	37	2013-08-13	13.65	3459246000		Sanidine	27	Iain Mason		129.138.12.160	7.875	H2 Baseline = A @ 8/14/13 11:22 AM @ argonlab; H1 Baseline = A @ 8/14/13 11:22 AM @ argonlab; AX Baseline = A @ 8/14/13 11:22 AM @ argonlab; L1 Baseline = A @ 8/14/13 11:22 AM @ argonlab; L2 Baseline = A @ 8/14/13 11:22 AM @ argonlab; CDD Baseline = A @ 8/14/13 11:22 AM @ argonlab; Ar41 = A @ 8/14/13 11:22 AM @ argonlab; Ar40 = P @ 8/14/13 11:22 AM @ argonlab; Ar39 = P @ 8/14/13 11:22 AM @ argonl…	Hole 28 (80-100 Mesh)	APPLLPAAAAAA	1	Pychron Script	1	Fusions CO2	4	4	0	4	0	30	30	125			0	53.0848
	12	4	4.6445	0.0201975	0.1011	0.888265	25.2608	99.3817	75.7111	0.187563								61735-12	CM-SS3	37	2013-08-13	10.3833	3459234000		Sanidine	27	Iain Mason		129.138.12.160	7.875	H2 Baseline = A @ 8/14/13 11:22 AM @ argonlab; H1 Baseline = A @ 8/14/13 11:22 AM @ argonlab; AX Baseline = A @ 8/14/13 11:22 AM @ argonlab; L1 Baseline = A @ 8/14/13 11:22 AM @ argonlab; L2 Baseline = A @ 8/14/13 11:22 AM @ argonlab; CDD Baseline = A @ 8/14/13 11:22 AM @ argonlab; Ar41 = A @ 8/14/13 11:22 AM @ argonlab; Ar40 = P @ 8/14/13 11:22 AM @ argonlab; Ar39 = P @ 8/14/13 11:22 AM @ argonl…	Hole 28 (80-100 Mesh)	APPLLPAAAAAA	1	Pychron Script	1	Fusions CO2	4	4	0	4	0	30	30	108			0	82.512
	08	4	4.65126	0.0142801	0.1098	0.48117	35.7283	99.3153	75.7694	0.331536								61735-08	CM-SS3	37	2013-08-13	9.73333	3459232000		Sanidine	27	Iain Mason		129.138.12.160	7.875	H2 Baseline = A @ 8/14/13 11:22 AM @ argonlab; H1 Baseline = A @ 8/14/13 11:22 AM @ argonlab; AX Baseline = A @ 8/14/13 11:22 AM @ argonlab; L1 Baseline = A @ 8/14/13 11:22 AM @ argonlab; L2 Baseline = A @ 8/14/13 11:22 AM @ argonlab; CDD Baseline = A @ 8/14/13 11:22 AM @ argonlab; Ar41 = A @ 8/14/13 11:22 AM @ argonlab; Ar40 = P @ 8/14/13 11:22 AM @ argonlab; Ar39 = P @ 8/14/13 11:22 AM @ argonl…	Hole 28 (80-100 Mesh)	APPLLPAAAAAA	1	Pychron Script	1	Fusions CO2	4	4	0	4	0	30	30	104			0	44.7614
	03	4	4.83374	0.0087229	0.0211	0.852523	58.4902	99.8868	79.1265	0.190807								61735-03	CM-SS3	37	2013-08-13	8.53333	3459228000		Sanidine	27	Iain Mason		129.138.12.160	7.875	H2 Baseline = A @ 8/14/13 11:22 AM @ argonlab; H1 Baseline = A @ 8/14/13 11:22 AM @ argonlab; AX Baseline = A @ 8/14/13 11:22 AM @ argonlab; L1 Baseline = A @ 8/14/13 11:22 AM @ argonlab; L2 Baseline = A @ 8/14/13 11:22 AM @ argonlab; CDD Baseline = A @ 8/14/13 11:22 AM @ argonlab; Ar41 = A @ 8/14/13 11:22 AM @ argonlab; Ar40 = P @ 8/14/13 11:22 AM @ argonlab; Ar39 = P @ 8/14/13 11:22 AM @ argonl…	Hole 28 (80-100 Mesh)	APPLLPAAAAAA	1	Pychron Script	1	Fusions CO2	4	4	0	4	0	30	30	99			0	82.418
	43	4	5.42426	-0.019934	0.1432	0.887869	-	99.1835	87.9669	0.213299								61735-43	CM-SS3	37	2013-08-13	16.5333	3459256000		Sanidine	27	Iain Mason		129.138.12.160	7.875	H2 Baseline = A @ 8/14/13 11:22 AM @ argonlab; H1 Baseline = A @ 8/14/13 11:22 AM @ argonlab; AX Baseline = A @ 8/14/13 11:22 AM @ argonlab; L1 Baseline = A @ 8/14/13 11:22 AM @ argonlab; L2 Baseline = A @ 8/14/13 11:22 AM @ argonlab; CDD Baseline = A @ 8/14/13 11:22 AM @ argonlab; Ar41 = A @ 8/14/13 11:22 AM @ argonlab; Ar40 = P @ 8/14/13 11:22 AM @ argonlab; Ar39 = P @ 8/14/13 11:22 AM @ argonl…	Hole 28 (80-100 Mesh)	APPLLPAAAAAA	1	Pychron Script	1	Fusions CO2	4	4	0	4	0	30	30	140			0	96.3194
	25	4	5.41741	0.0101962	0.0483	0.468219	50.0386	99.7462	88.3465	0.410253								61735-25	CM-SS3	37	2013-08-13	12.9167	3459243000		Sanidine	27	Iain Mason		129.138.12.160	7.875	H2 Baseline = A @ 8/14/13 11:22 AM @ argonlab; H1 Baseline = A @ 8/14/13 11:22 AM @ argonlab; AX Baseline = A @ 8/14/13 11:22 AM @ argonlab; L1 Baseline = A @ 8/14/13 11:22 AM @ argonlab; L2 Baseline = A @ 8/14/13 11:22 AM @ argonlab; CDD Baseline = A @ 8/14/13 11:22 AM @ argonlab; Ar41 = A @ 8/14/13 11:22 AM @ argonlab; Ar40 = P @ 8/14/13 11:22 AM @ argonlab; Ar39 = P @ 8/14/13 11:22 AM @ argonl…	Hole 28 (80-100 Mesh)	APPLLPAAAAAA	1	Pychron Script	1	Fusions CO2	4	4	0	4	0	30	30	122			0	50.731
	16	4	5.8881	-0.0125947	1.1524	0.84346	-	94.1457	90.5841	0.328611								61735-16	CM-SS3	37	2013-08-13	11.4333	3459238000		Sanidine	27	Iain Mason		129.138.12.160	7.875	H2 Baseline = A @ 8/14/13 11:22 AM @ argonlab; H1 Baseline = A @ 8/14/13 11:22 AM @ argonlab; AX Baseline = A @ 8/14/13 11:22 AM @ argonlab; L1 Baseline = A @ 8/14/13 11:22 AM @ argonlab; L2 Baseline = A @ 8/14/13 11:22 AM @ argonlab; CDD Baseline = A @ 8/14/13 11:22 AM @ argonlab; Ar41 = A @ 8/14/13 11:22 AM @ argonlab; Ar40 = P @ 8/14/13 11:22 AM @ argonlab; Ar39 = P @ 8/14/13 11:22 AM @ argonl…	Hole 28 (80-100 Mesh)	APPLLPAAAAAA	1	Pychron Script	1	Fusions CO2	4	4	0	4	0	30	30	113			0	99.3267
	06	4	5.59834	0.0208741	-0.00633872	0.447477	24.442	100.066	91.5148	0.363285								61735-06	CM-SS3	37	2013-08-13	9.53333	3459231000		Sanidine	27	Iain Mason		129.138.12.160	7.875	H2 Baseline = A @ 8/14/13 11:22 AM @ argonlab; H1 Baseline = A @ 8/14/13 11:22 AM @ argonlab; AX Baseline = A @ 8/14/13 11:22 AM @ argonlab; L1 Baseline = A @ 8/14/13 11:22 AM @ argonlab; L2 Baseline = A @ 8/14/13 11:22 AM @ argonlab; CDD Baseline = A @ 8/14/13 11:22 AM @ argonlab; Ar41 = A @ 8/14/13 11:22 AM @ argonlab; Ar40 = P @ 8/14/13 11:22 AM @ argonlab; Ar39 = P @ 8/14/13 11:22 AM @ argonl…	Hole 28 (80-100 Mesh)	APPLLPAAAAAA	1	Pychron Script	1	Fusions CO2	4	4	0	4	0	30	30	102			0	50.1033
	09	4	5.74819	-0.0437782	0.1611	0.398628	-	99.1012	93.0191	0.486551								61735-09	CM-SS3	37	2013-08-13	9.83333	3459232000		Sanidine	27	Iain Mason		129.138.12.160	7.875	H2 Baseline = A @ 8/14/13 11:22 AM @ argonlab; H1 Baseline = A @ 8/14/13 11:22 AM @ argonlab; AX Baseline = A @ 8/14/13 11:22 AM @ argonlab; L1 Baseline = A @ 8/14/13 11:22 AM @ argonlab; L2 Baseline = A @ 8/14/13 11:22 AM @ argonlab; CDD Baseline = A @ 8/14/13 11:22 AM @ argonlab; Ar41 = A @ 8/14/13 11:22 AM @ argonlab; Ar40 = P @ 8/14/13 11:22 AM @ argonlab; Ar39 = P @ 8/14/13 11:22 AM @ argonl…	Hole 28 (80-100 Mesh)	APPLLPAAAAAA	1	Pychron Script	1	Fusions CO2	4	4	0	4	0	30	30	105			0	45.8265
	10	4	8.5606	-0.0055084	0.165	0.771555	-	99.4179	137.346	0.321128								61735-10	CM-SS3	37	2013-08-13	9.95	3459233000		Sanidine	27	Iain Mason		129.138.12.160	7.875	H2 Baseline = A @ 8/14/13 11:22 AM @ argonlab; H1 Baseline = A @ 8/14/13 11:22 AM @ argonlab; AX Baseline = A @ 8/14/13 11:22 AM @ argonlab; L1 Baseline = A @ 8/14/13 11:22 AM @ argonlab; L2 Baseline = A @ 8/14/13 11:22 AM @ argonlab; CDD Baseline = A @ 8/14/13 11:22 AM @ argonlab; Ar41 = A @ 8/14/13 11:22 AM @ argonlab; Ar40 = P @ 8/14/13 11:22 AM @ argonlab; Ar39 = P @ 8/14/13 11:22 AM @ argonl…	Hole 28 (80-100 Mesh)	APPLLPAAAAAA	1	Pychron Script	1	Fusions CO2	4	4	0	4	0	30	30	106			0	132.099
	59	4	8.57468	0.0211643	0.1445	0.834378	24.1068	99.5174	137.698	0.31097								61735-59	CM-SS3	37	2013-08-13	20.0833	3459269000		Sanidine	27	Iain Mason		129.138.12.160	7.875	H2 Baseline = A @ 8/14/13 11:22 AM @ argonlab; H1 Baseline = A @ 8/14/13 11:22 AM @ argonlab; AX Baseline = A @ 8/14/13 11:22 AM @ argonlab; L1 Baseline = A @ 8/14/13 11:22 AM @ argonlab; L2 Baseline = A @ 8/14/13 11:22 AM @ argonlab; CDD Baseline = A @ 8/14/13 11:22 AM @ argonlab; Ar41 = A @ 8/14/13 11:22 AM @ argonlab; Ar40 = P @ 8/14/13 11:22 AM @ argonlab; Ar39 = P @ 8/14/13 11:22 AM @ argonl…	Hole 28 (80-100 Mesh)	APPLLPAAAAAA	1	Pychron Script	1	Fusions CO2	4	4	0	4	0	30	30	156			0	143.092
	57	4	11.3352	0.189817	7.2297	0.069942	2.68787	81.1068	147.981	3.78714								61735-57	CM-SS3	37	2013-08-13	19.6667	3459268000		Sanidine	27	Iain Mason		129.138.12.160	7.875	H2 Baseline = A @ 8/14/13 11:22 AM @ argonlab; H1 Baseline = A @ 8/14/13 11:22 AM @ argonlab; AX Baseline = A @ 8/14/13 11:22 AM @ argonlab; L1 Baseline = A @ 8/14/13 11:22 AM @ argonlab; L2 Baseline = A @ 8/14/13 11:22 AM @ argonlab; CDD Baseline = A @ 8/14/13 11:22 AM @ argonlab; Ar41 = A @ 8/14/13 11:22 AM @ argonlab; Ar40 = P @ 8/14/13 11:22 AM @ argonlab; Ar39 = P @ 8/14/13 11:22 AM @ argonl…	Hole 28 (80-100 Mesh)	APPLLPAAAAAA	1	Pychron Script	1	Fusions CO2	4	4	0	4	0	30	30	154			0	15.8581
	18	4	9.97237	0.010967	2.548	1.09266	46.5217	92.3887	148.256	0.390528								61735-18	CM-SS3	37	2013-08-13	11.65	3459239000		Sanidine	27	Iain Mason		129.138.12.160	7.875	H2 Baseline = A @ 8/14/13 11:22 AM @ argonlab; H1 Baseline = A @ 8/14/13 11:22 AM @ argonlab; AX Baseline = A @ 8/14/13 11:22 AM @ argonlab; L1 Baseline = A @ 8/14/13 11:22 AM @ argonlab; L2 Baseline = A @ 8/14/13 11:22 AM @ argonlab; CDD Baseline = A @ 8/14/13 11:22 AM @ argonlab; Ar41 = A @ 8/14/13 11:22 AM @ argonlab; Ar40 = P @ 8/14/13 11:22 AM @ argonlab; Ar39 = P @ 8/14/13 11:22 AM @ argonl…	Hole 28 (80-100 Mesh)	APPLLPAAAAAA	1	Pychron Script	1	Fusions CO2	4	4	0	4	0	30	30	115			0	217.93
	39	4	9.6257	0.0068701	0.2835	4.29429	74.2644	99.1283	153.321	0.103294								61735-39	CM-SS3	37	2013-08-13	15.8833	3459254000		Sanidine	27	Iain Mason		129.138.12.160	7.875	H2 Baseline = A @ 8/14/13 11:22 AM @ argonlab; H1 Baseline = A @ 8/14/13 11:22 AM @ argonlab; AX Baseline = A @ 8/14/13 11:22 AM @ argonlab; L1 Baseline = A @ 8/14/13 11:22 AM @ argonlab; L2 Baseline = A @ 8/14/13 11:22 AM @ argonlab; CDD Baseline = A @ 8/14/13 11:22 AM @ argonlab; Ar41 = A @ 8/14/13 11:22 AM @ argonlab; Ar40 = P @ 8/14/13 11:22 AM @ argonlab; Ar39 = P @ 8/14/13 11:22 AM @ argonl…	Hole 28 (80-100 Mesh)	APPLLPAAAAAA	1	Pychron Script	1	Fusions CO2	4	4	0	4	0	30	30	136			0	826.715
	19	4	11.6309	0.0493383	0.7104	0.283884	10.3409	98.2101	182.115	1.12219								61735-19	CM-SS3	37	2013-08-13	11.7667	3459239000		Sanidine	27	Iain Mason		129.138.12.160	7.875	H2 Baseline = A @ 8/14/13 11:22 AM @ argonlab; H1 Baseline = A @ 8/14/13 11:22 AM @ argonlab; AX Baseline = A @ 8/14/13 11:22 AM @ argonlab; L1 Baseline = A @ 8/14/13 11:22 AM @ argonlab; L2 Baseline = A @ 8/14/13 11:22 AM @ argonlab; CDD Baseline = A @ 8/14/13 11:22 AM @ argonlab; Ar41 = A @ 8/14/13 11:22 AM @ argonlab; Ar40 = P @ 8/14/13 11:22 AM @ argonlab; Ar39 = P @ 8/14/13 11:22 AM @ argonl…	Hole 28 (80-100 Mesh)	APPLLPAAAAAA	1	Pychron Script	1	Fusions CO2	4	4	0	4	0	30	30	116			0	66.0389
	29	4	14.0809	0.0240693	0.2045	1.02633	21.1973	99.5797	221.157	0.318699								61735-29	CM-SS3	37	2013-08-13	13.75	3459246000		Sanidine	27	Iain Mason		129.138.12.160	7.875	H2 Baseline = A @ 8/14/13 11:22 AM @ argonlab; H1 Baseline = A @ 8/14/13 11:22 AM @ argonlab; AX Baseline = A @ 8/14/13 11:22 AM @ argonlab; L1 Baseline = A @ 8/14/13 11:22 AM @ argonlab; L2 Baseline = A @ 8/14/13 11:22 AM @ argonlab; CDD Baseline = A @ 8/14/13 11:22 AM @ argonlab; Ar41 = A @ 8/14/13 11:22 AM @ argonlab; Ar40 = P @ 8/14/13 11:22 AM @ argonlab; Ar39 = P @ 8/14/13 11:22 AM @ argonl…	Hole 28 (80-100 Mesh)	APPLLPAAAAAA	1	Pychron Script	1	Fusions CO2	4	4	0	4	0	30	30	126			0	289.037
	23	4	14.34	0.0057355	0.1724	0.668708	88.9555	99.6443	225.123	0.471842								61735-23	CM-SS3	37	2013-08-13	12.2667	3459241000		Sanidine	27	Iain Mason		129.138.12.160	7.875	H2 Baseline = A @ 8/14/13 11:22 AM @ argonlab; H1 Baseline = A @ 8/14/13 11:22 AM @ argonlab; AX Baseline = A @ 8/14/13 11:22 AM @ argonlab; L1 Baseline = A @ 8/14/13 11:22 AM @ argonlab; L2 Baseline = A @ 8/14/13 11:22 AM @ argonlab; CDD Baseline = A @ 8/14/13 11:22 AM @ argonlab; Ar41 = A @ 8/14/13 11:22 AM @ argonlab; Ar40 = P @ 8/14/13 11:22 AM @ argonlab; Ar39 = P @ 8/14/13 11:22 AM @ argonl…	Hole 28 (80-100 Mesh)	APPLLPAAAAAA	1	Pychron Script	1	Fusions CO2	4	4	0	4	0	30	30	120			0	191.786
	14	4	14.3775	-0.0009459	0.1114	2.9014	-	99.7693	225.944	0.170321								61735-14	CM-SS3	37	2013-08-13	10.5833	3459235000		Sanidine	27	Iain Mason		129.138.12.160	7.875	H2 Baseline = A @ 8/14/13 11:22 AM @ argonlab; H1 Baseline = A @ 8/14/13 11:22 AM @ argonlab; AX Baseline = A @ 8/14/13 11:22 AM @ argonlab; L1 Baseline = A @ 8/14/13 11:22 AM @ argonlab; L2 Baseline = A @ 8/14/13 11:22 AM @ argonlab; CDD Baseline = A @ 8/14/13 11:22 AM @ argonlab; Ar41 = A @ 8/14/13 11:22 AM @ argonlab; Ar40 = P @ 8/14/13 11:22 AM @ argonlab; Ar39 = P @ 8/14/13 11:22 AM @ argonl…	Hole 28 (80-100 Mesh)	APPLLPAAAAAA	1	Pychron Script	1	Fusions CO2	4	4	0	4	0	30	30	110			0	834.301
	40	4	15.0324	-0.0056966	1.0879	0.914638	-	97.8387	231.322	0.434038								61735-40	CM-SS3	37	2013-08-13	16	3459254000		Sanidine	27	Iain Mason		129.138.12.160	7.875	H2 Baseline = A @ 8/14/13 11:22 AM @ argonlab; H1 Baseline = A @ 8/14/13 11:22 AM @ argonlab; AX Baseline = A @ 8/14/13 11:22 AM @ argonlab; L1 Baseline = A @ 8/14/13 11:22 AM @ argonlab; L2 Baseline = A @ 8/14/13 11:22 AM @ argonlab; CDD Baseline = A @ 8/14/13 11:22 AM @ argonlab; Ar41 = A @ 8/14/13 11:22 AM @ argonlab; Ar40 = P @ 8/14/13 11:22 AM @ argonlab; Ar39 = P @ 8/14/13 11:22 AM @ argonl…	Hole 28 (80-100 Mesh)	APPLLPAAAAAA	1	Pychron Script	1	Fusions CO2	4	4	0	4	0	30	30	137			0	274.984
	24	4	16.0079	-0.0081457	0.0654	0.923415	-	99.8745	250.147	0.405347								61735-24	CM-SS3	37	2013-08-13	12.6	3459242000		Sanidine	27	Iain Mason		129.138.12.160	7.875	H2 Baseline = A @ 8/14/13 11:22 AM @ argonlab; H1 Baseline = A @ 8/14/13 11:22 AM @ argonlab; AX Baseline = A @ 8/14/13 11:22 AM @ argonlab; L1 Baseline = A @ 8/14/13 11:22 AM @ argonlab; L2 Baseline = A @ 8/14/13 11:22 AM @ argonlab; CDD Baseline = A @ 8/14/13 11:22 AM @ argonlab; Ar41 = A @ 8/14/13 11:22 AM @ argonlab; Ar40 = P @ 8/14/13 11:22 AM @ argonlab; Ar39 = P @ 8/14/13 11:22 AM @ argonl…	Hole 28 (80-100 Mesh)	APPLLPAAAAAA	1	Pychron Script	1	Fusions CO2	4	4	0	4	0	30	30	121			0	295.637
	33	4	16.2141	0.0257386	0.3034	1.05665	19.8225	99.4547	252.168	0.380648								61735-33	CM-SS3	37	2013-08-13	14.4	3459249000		Sanidine	27	Iain Mason		129.138.12.160	7.875	H2 Baseline = A @ 8/14/13 11:22 AM @ argonlab; H1 Baseline = A @ 8/14/13 11:22 AM @ argonlab; AX Baseline = A @ 8/14/13 11:22 AM @ argonlab; L1 Baseline = A @ 8/14/13 11:22 AM @ argonlab; L2 Baseline = A @ 8/14/13 11:22 AM @ argonlab; CDD Baseline = A @ 8/14/13 11:22 AM @ argonlab; Ar41 = A @ 8/14/13 11:22 AM @ argonlab; Ar40 = P @ 8/14/13 11:22 AM @ argonlab; Ar39 = P @ 8/14/13 11:22 AM @ argonl…	Hole 28 (80-100 Mesh)	APPLLPAAAAAA	1	Pychron Script	1	Fusions CO2	4	4	0	4	0	30	30	130			0	342.659
	17	4	17.1512	0.0171325	1.3957	1.20145	29.7799	97.5821	261.075	0.388502								61735-17	CM-SS3	37	2013-08-13	11.55	3459238000		Sanidine	27	Iain Mason		129.138.12.160	7.875	H2 Baseline = A @ 8/14/13 11:22 AM @ argonlab; H1 Baseline = A @ 8/14/13 11:22 AM @ argonlab; AX Baseline = A @ 8/14/13 11:22 AM @ argonlab; L1 Baseline = A @ 8/14/13 11:22 AM @ argonlab; L2 Baseline = A @ 8/14/13 11:22 AM @ argonlab; CDD Baseline = A @ 8/14/13 11:22 AM @ argonlab; Ar41 = A @ 8/14/13 11:22 AM @ argonlab; Ar40 = P @ 8/14/13 11:22 AM @ argonlab; Ar39 = P @ 8/14/13 11:22 AM @ argonl…	Hole 28 (80-100 Mesh)	APPLLPAAAAAA	1	Pychron Script	1	Fusions CO2	4	4	0	4	0	30	30	114			0	412.13
	35	4	17.4118	0.0129302	0.1949	1.0534	39.4583	99.6727	270.043	0.397417								61735-35	CM-SS3	37	2013-08-13	15.0333	3459251000		Sanidine	27	Iain Mason		129.138.12.160	7.875	H2 Baseline = A @ 8/14/13 11:22 AM @ argonlab; H1 Baseline = A @ 8/14/13 11:22 AM @ argonlab; AX Baseline = A @ 8/14/13 11:22 AM @ argonlab; L1 Baseline = A @ 8/14/13 11:22 AM @ argonlab; L2 Baseline = A @ 8/14/13 11:22 AM @ argonlab; CDD Baseline = A @ 8/14/13 11:22 AM @ argonlab; Ar41 = A @ 8/14/13 11:22 AM @ argonlab; Ar40 = P @ 8/14/13 11:22 AM @ argonlab; Ar39 = P @ 8/14/13 11:22 AM @ argonl…	Hole 28 (80-100 Mesh)	APPLLPAAAAAA	1	Pychron Script	1	Fusions CO2	4	4	0	4	0	30	30	132			0	366.836
	13	4	18.9034	0.0012921	1.1659	1.51701	394.864	98.162	287.345	0.515708								61735-13	CM-SS3	37	2013-08-13	10.4833	3459235000		Sanidine	27	Iain Mason		129.138.12.160	7.875	H2 Baseline = A @ 8/14/13 11:22 AM @ argonlab; H1 Baseline = A @ 8/14/13 11:22 AM @ argonlab; AX Baseline = A @ 8/14/13 11:22 AM @ argonlab; L1 Baseline = A @ 8/14/13 11:22 AM @ argonlab; L2 Baseline = A @ 8/14/13 11:22 AM @ argonlab; CDD Baseline = A @ 8/14/13 11:22 AM @ argonlab; Ar41 = A @ 8/14/13 11:22 AM @ argonlab; Ar40 = P @ 8/14/13 11:22 AM @ argonlab; Ar39 = P @ 8/14/13 11:22 AM @ argonl…	Hole 28 (80-100 Mesh)	APPLLPAAAAAA	1	Pychron Script	1	Fusions CO2	4	4	0	4	0	30	30	109			0	573.532
	45	4	21.2133	0.003585	0.0496	0.871166	142.316	99.9312	324.845	0.503468								61735-45	CM-SS3	37	2013-08-13	17.1667	3459259000		Sanidine	27	Iain Mason		129.138.12.160	7.875	H2 Baseline = A @ 8/14/13 11:22 AM @ argonlab; H1 Baseline = A @ 8/14/13 11:22 AM @ argonlab; AX Baseline = A @ 8/14/13 11:22 AM @ argonlab; L1 Baseline = A @ 8/14/13 11:22 AM @ argonlab; L2 Baseline = A @ 8/14/13 11:22 AM @ argonlab; CDD Baseline = A @ 8/14/13 11:22 AM @ argonlab; Ar41 = A @ 8/14/13 11:22 AM @ argonlab; Ar40 = P @ 8/14/13 11:22 AM @ argonlab; Ar39 = P @ 8/14/13 11:22 AM @ argonl…	Hole 28 (80-100 Mesh)	APPLLPAAAAAA	1	Pychron Script	1	Fusions CO2	4	4	0	4	0	30	30	142			0	369.607
	02	4	21.4484	0.0031279	0.4186	1.54953	163.114	99.42	326.604	0.346288								61735-02	CM-SS3	37	2013-08-13	8.43333	3459227000		Sanidine	27	Iain Mason		129.138.12.160	7.875	H2 Baseline = A @ 8/14/13 11:22 AM @ argonlab; H1 Baseline = A @ 8/14/13 11:22 AM @ argonlab; AX Baseline = A @ 8/14/13 11:22 AM @ argonlab; L1 Baseline = A @ 8/14/13 11:22 AM @ argonlab; L2 Baseline = A @ 8/14/13 11:22 AM @ argonlab; CDD Baseline = A @ 8/14/13 11:22 AM @ argonlab; Ar41 = A @ 8/14/13 11:22 AM @ argonlab; Ar40 = P @ 8/14/13 11:22 AM @ argonlab; Ar39 = P @ 8/14/13 11:22 AM @ argonl…	Hole 28 (80-100 Mesh)	APPLLPAAAAAA	1	Pychron Script	1	Fusions CO2	4	4	0	4	0	30	30	98			0	664.701
	47	4	23.2015	-0.0003248	0.0556	0.653703	-	99.9283	352.532	0.735271								61735-47	CM-SS3	37	2013-08-13	17.4333	3459260000		Sanidine	27	Iain Mason		129.138.12.160	7.875	H2 Baseline = A @ 8/14/13 11:22 AM @ argonlab; H1 Baseline = A @ 8/14/13 11:22 AM @ argonlab; AX Baseline = A @ 8/14/13 11:22 AM @ argonlab; L1 Baseline = A @ 8/14/13 11:22 AM @ argonlab; L2 Baseline = A @ 8/14/13 11:22 AM @ argonlab; CDD Baseline = A @ 8/14/13 11:22 AM @ argonlab; Ar41 = A @ 8/14/13 11:22 AM @ argonlab; Ar40 = P @ 8/14/13 11:22 AM @ argonlab; Ar39 = P @ 8/14/13 11:22 AM @ argonl…	Hole 28 (80-100 Mesh)	APPLLPAAAAAA	1	Pychron Script	1	Fusions CO2	4	4	0	4	0	30	30	144			0	303.338
	58	4	25.3269	-0.0134766	0.0837	0.99211	-	99.8973	381.573	0.574911								61735-58	CM-SS3	37	2013-08-13	19.7667	3459268000		Sanidine	27	Iain Mason		129.138.12.160	7.875	H2 Baseline = A @ 8/14/13 11:22 AM @ argonlab; H1 Baseline = A @ 8/14/13 11:22 AM @ argonlab; AX Baseline = A @ 8/14/13 11:22 AM @ argonlab; L1 Baseline = A @ 8/14/13 11:22 AM @ argonlab; L2 Baseline = A @ 8/14/13 11:22 AM @ argonlab; CDD Baseline = A @ 8/14/13 11:22 AM @ argonlab; Ar41 = A @ 8/14/13 11:22 AM @ argonlab; Ar40 = P @ 8/14/13 11:22 AM @ argonlab; Ar39 = P @ 8/14/13 11:22 AM @ argonl…	Hole 28 (80-100 Mesh)	APPLLPAAAAAA	1	Pychron Script	1	Fusions CO2	4	4	0	4	0	30	30	155			0	502.537
	36	4	25.464	0.0167069	0.2649	1.28099	30.5385	99.6953	382.744	0.46562								61735-36	CM-SS3	37	2013-08-13	15.1333	3459251000		Sanidine	27	Iain Mason		129.138.12.160	7.875	H2 Baseline = A @ 8/14/13 11:22 AM @ argonlab; H1 Baseline = A @ 8/14/13 11:22 AM @ argonlab; AX Baseline = A @ 8/14/13 11:22 AM @ argonlab; L1 Baseline = A @ 8/14/13 11:22 AM @ argonlab; L2 Baseline = A @ 8/14/13 11:22 AM @ argonlab; CDD Baseline = A @ 8/14/13 11:22 AM @ argonlab; Ar41 = A @ 8/14/13 11:22 AM @ argonlab; Ar40 = P @ 8/14/13 11:22 AM @ argonlab; Ar39 = P @ 8/14/13 11:22 AM @ argonl…	Hole 28 (80-100 Mesh)	APPLLPAAAAAA	1	Pychron Script	1	Fusions CO2	4	4	0	4	0	30	30	133			0	652.391
	41	4	26.7153	0.0662965	0.349	0.0959582	7.69579	99.6296	399.418	5.00181								61735-41	CM-SS3	37	2013-08-13	16.1	3459255000		Sanidine	27	Iain Mason		129.138.12.160	7.875	H2 Baseline = A @ 8/14/13 11:22 AM @ argonlab; H1 Baseline = A @ 8/14/13 11:22 AM @ argonlab; AX Baseline = A @ 8/14/13 11:22 AM @ argonlab; L1 Baseline = A @ 8/14/13 11:22 AM @ argonlab; L2 Baseline = A @ 8/14/13 11:22 AM @ argonlab; CDD Baseline = A @ 8/14/13 11:22 AM @ argonlab; Ar41 = A @ 8/14/13 11:22 AM @ argonlab; Ar40 = P @ 8/14/13 11:22 AM @ argonlab; Ar39 = P @ 8/14/13 11:22 AM @ argonl…	Hole 28 (80-100 Mesh)	APPLLPAAAAAA	1	Pychron Script	1	Fusions CO2	4	4	0	4	0	30	30	138			0	51.2733
	32	4	30.8102	-0.0082199	0.0057953	1.30276	-	99.9924	455.069	0.58383								61735-32	CM-SS3	37	2013-08-13	14.3	3459248000		Sanidine	27	Iain Mason		129.138.12.160	7.875	H2 Baseline = A @ 8/14/13 11:22 AM @ argonlab; H1 Baseline = A @ 8/14/13 11:22 AM @ argonlab; AX Baseline = A @ 8/14/13 11:22 AM @ argonlab; L1 Baseline = A @ 8/14/13 11:22 AM @ argonlab; L2 Baseline = A @ 8/14/13 11:22 AM @ argonlab; CDD Baseline = A @ 8/14/13 11:22 AM @ argonlab; Ar41 = A @ 8/14/13 11:22 AM @ argonlab; Ar40 = P @ 8/14/13 11:22 AM @ argonlab; Ar39 = P @ 8/14/13 11:22 AM @ argonl…	Hole 28 (80-100 Mesh)	APPLLPAAAAAA	1	Pychron Script	1	Fusions CO2	4	4	0	4	0	30	30	129			0	802.763
	07	4	36.511	0.0158334	0.00503252	0.913528	32.2233	99.9995	528.198	0.742952								61735-07	CM-SS3	37	2013-08-13	9.63333	3459232000		Sanidine	27	Iain Mason		129.138.12.160	7.875	H2 Baseline = A @ 8/14/13 11:22 AM @ argonlab; H1 Baseline = A @ 8/14/13 11:22 AM @ argonlab; AX Baseline = A @ 8/14/13 11:22 AM @ argonlab; L1 Baseline = A @ 8/14/13 11:22 AM @ argonlab; L2 Baseline = A @ 8/14/13 11:22 AM @ argonlab; CDD Baseline = A @ 8/14/13 11:22 AM @ argonlab; Ar41 = A @ 8/14/13 11:22 AM @ argonlab; Ar40 = P @ 8/14/13 11:22 AM @ argonlab; Ar39 = P @ 8/14/13 11:22 AM @ argonl…	Hole 28 (80-100 Mesh)	APPLLPAAAAAA	1	Pychron Script	1	Fusions CO2	4	4	0	4	0	30	30	103			0	667.083
	01	4	37.3965	0.0060811	0.0739	1.37118	83.9	99.9427	539.026	0.590286								61735-01	CM-SS3	37	2013-08-13	8.33333	3459227000		Sanidine	27	Iain Mason		129.138.12.160	7.875	H2 Baseline = A @ 8/14/13 11:22 AM @ argonlab; H1 Baseline = A @ 8/14/13 11:22 AM @ argonlab; AX Baseline = A @ 8/14/13 11:22 AM @ argonlab; L1 Baseline = A @ 8/14/13 11:22 AM @ argonlab; L2 Baseline = A @ 8/14/13 11:22 AM @ argonlab; CDD Baseline = A @ 8/14/13 11:22 AM @ argonlab; Ar41 = A @ 8/14/13 11:22 AM @ argonlab; Ar40 = P @ 8/14/13 11:22 AM @ argonlab; Ar39 = P @ 8/14/13 11:22 AM @ argonl…	Hole 28 (80-100 Mesh)	APPLLPAAAAAA	1	Pychron Script	1	Fusions CO2	4	4	0	4	0	30	30	97			0	1025.55
	38	4	38.3168	0.0018385	0.3275	1.92744	277.511	99.7461	549.547	0.491432								61735-38	CM-SS3	37	2013-08-13	15.7833	3459254000		Sanidine	27	Iain Mason		129.138.12.160	7.875	H2 Baseline = A @ 8/14/13 11:22 AM @ argonlab; H1 Baseline = A @ 8/14/13 11:22 AM @ argonlab; AX Baseline = A @ 8/14/13 11:22 AM @ argonlab; L1 Baseline = A @ 8/14/13 11:22 AM @ argonlab; L2 Baseline = A @ 8/14/13 11:22 AM @ argonlab; CDD Baseline = A @ 8/14/13 11:22 AM @ argonlab; Ar41 = A @ 8/14/13 11:22 AM @ argonlab; Ar40 = P @ 8/14/13 11:22 AM @ argonlab; Ar39 = P @ 8/14/13 11:22 AM @ argonl…	Hole 28 (80-100 Mesh)	APPLLPAAAAAA	1	Pychron Script	1	Fusions CO2	4	4	0	4	0	30	30	135			0	1477.07
	31	4	39.3368	0.0120752	2.1733	0.688849	42.2522	98.3557	555.387	1.06706								61735-31	CM-SS3	37	2013-08-13	14.2	3459248000		Sanidine	27	Iain Mason		129.138.12.160	7.875	H2 Baseline = A @ 8/14/13 11:22 AM @ argonlab; H1 Baseline = A @ 8/14/13 11:22 AM @ argonlab; AX Baseline = A @ 8/14/13 11:22 AM @ argonlab; L1 Baseline = A @ 8/14/13 11:22 AM @ argonlab; L2 Baseline = A @ 8/14/13 11:22 AM @ argonlab; CDD Baseline = A @ 8/14/13 11:22 AM @ argonlab; Ar41 = A @ 8/14/13 11:22 AM @ argonlab; Ar40 = P @ 8/14/13 11:22 AM @ argonlab; Ar39 = P @ 8/14/13 11:22 AM @ argonl…	Hole 28 (80-100 Mesh)	APPLLPAAAAAA	1	Pychron Script	1	Fusions CO2	4	4	0	4	0	30	30	128			0	541.947
	05	4	41.157	0.0075008	0.1313	1.39735	68.0199	99.9063	585.213	0.51641								61735-05	CM-SS3	37	2013-08-13	9	3459229000		Sanidine	27	Iain Mason		129.138.12.160	7.875	H2 Baseline = A @ 8/14/13 11:22 AM @ argonlab; H1 Baseline = A @ 8/14/13 11:22 AM @ argonlab; AX Baseline = A @ 8/14/13 11:22 AM @ argonlab; L1 Baseline = A @ 8/14/13 11:22 AM @ argonlab; L2 Baseline = A @ 8/14/13 11:22 AM @ argonlab; CDD Baseline = A @ 8/14/13 11:22 AM @ argonlab; Ar41 = A @ 8/14/13 11:22 AM @ argonlab; Ar40 = P @ 8/14/13 11:22 AM @ argonlab; Ar39 = P @ 8/14/13 11:22 AM @ argonl…	Hole 28 (80-100 Mesh)	APPLLPAAAAAA	1	Pychron Script	1	Fusions CO2	4	4	0	4	0	30	30	101			0	1150.22
	44	4	43.2203	-0.016355	0.1149	1.14918	-	99.9176	610.209	0.77908								61735-44	CM-SS3	37	2013-08-13	16.85	3459258000		Sanidine	27	Iain Mason		129.138.12.160	7.875	H2 Baseline = A @ 8/14/13 11:22 AM @ argonlab; H1 Baseline = A @ 8/14/13 11:22 AM @ argonlab; AX Baseline = A @ 8/14/13 11:22 AM @ argonlab; L1 Baseline = A @ 8/14/13 11:22 AM @ argonlab; L2 Baseline = A @ 8/14/13 11:22 AM @ argonlab; CDD Baseline = A @ 8/14/13 11:22 AM @ argonlab; Ar41 = A @ 8/14/13 11:22 AM @ argonlab; Ar40 = P @ 8/14/13 11:22 AM @ argonlab; Ar39 = P @ 8/14/13 11:22 AM @ argonl…	Hole 28 (80-100 Mesh)	APPLLPAAAAAA	1	Pychron Script	1	Fusions CO2	4	4	0	4	0	30	30	141			0	993.352
	51	4	52.0349	0.0135244	0.00880536	0.983147	37.7247	99.9969	713.591	1.06257								61735-51	CM-SS3	37	2013-08-13	18.6	3459264000		Sanidine	27	Iain Mason		129.138.12.160	7.875	H2 Baseline = A @ 8/14/13 11:22 AM @ argonlab; H1 Baseline = A @ 8/14/13 11:22 AM @ argonlab; AX Baseline = A @ 8/14/13 11:22 AM @ argonlab; L1 Baseline = A @ 8/14/13 11:22 AM @ argonlab; L2 Baseline = A @ 8/14/13 11:22 AM @ argonlab; CDD Baseline = A @ 8/14/13 11:22 AM @ argonlab; Ar41 = A @ 8/14/13 11:22 AM @ argonlab; Ar40 = P @ 8/14/13 11:22 AM @ argonlab; Ar39 = P @ 8/14/13 11:22 AM @ argonl…	Hole 28 (80-100 Mesh)	APPLLPAAAAAA	1	Pychron Script	1	Fusions CO2	4	4	0	4	0	30	30	148			0	1023.17
	20	4	55.3556	0.0155355	0.0624	0.773415	32.8412	99.9685	750.751	1.36546								61735-20	CM-SS3	37	2013-08-13	11.8667	3459240000		Sanidine	27	Iain Mason		129.138.12.160	7.875	H2 Baseline = A @ 8/14/13 11:22 AM @ argonlab; H1 Baseline = A @ 8/14/13 11:22 AM @ argonlab; AX Baseline = A @ 8/14/13 11:22 AM @ argonlab; L1 Baseline = A @ 8/14/13 11:22 AM @ argonlab; L2 Baseline = A @ 8/14/13 11:22 AM @ argonlab; CDD Baseline = A @ 8/14/13 11:22 AM @ argonlab; Ar41 = A @ 8/14/13 11:22 AM @ argonlab; Ar40 = P @ 8/14/13 11:22 AM @ argonlab; Ar39 = P @ 8/14/13 11:22 AM @ argonl…	Hole 28 (80-100 Mesh)	APPLLPAAAAAA	1	Pychron Script	1	Fusions CO2	4	4	0	4	0	30	30	117			0	856.267
	54	4	61.8068	0.0121607	0.5257	0.819013	41.9552	99.7482	819.702	1.2269								61735-54	CM-SS3	37	2013-08-13	18.9167	3459265000		Sanidine	27	Iain Mason		129.138.12.160	7.875	H2 Baseline = A @ 8/14/13 11:22 AM @ argonlab; H1 Baseline = A @ 8/14/13 11:22 AM @ argonlab; AX Baseline = A @ 8/14/13 11:22 AM @ argonlab; L1 Baseline = A @ 8/14/13 11:22 AM @ argonlab; L2 Baseline = A @ 8/14/13 11:22 AM @ argonlab; CDD Baseline = A @ 8/14/13 11:22 AM @ argonlab; Ar41 = A @ 8/14/13 11:22 AM @ argonlab; Ar40 = P @ 8/14/13 11:22 AM @ argonlab; Ar39 = P @ 8/14/13 11:22 AM @ argonl…	Hole 28 (80-100 Mesh)	APPLLPAAAAAA	1	Pychron Script	1	Fusions CO2	4	4	0	4	0	30	30	151			0	1012.42
	56	4	65.9343	-0.0308345	0.3095	0.248256	-	99.8573	864.042	3.50034								61735-56	CM-SS3	37	2013-08-13	19.3333	3459266000		Sanidine	27	Iain Mason		129.138.12.160	7.875	H2 Baseline = A @ 8/14/13 11:22 AM @ argonlab; H1 Baseline = A @ 8/14/13 11:22 AM @ argonlab; AX Baseline = A @ 8/14/13 11:22 AM @ argonlab; L1 Baseline = A @ 8/14/13 11:22 AM @ argonlab; L2 Baseline = A @ 8/14/13 11:22 AM @ argonlab; CDD Baseline = A @ 8/14/13 11:22 AM @ argonlab; Ar41 = A @ 8/14/13 11:22 AM @ argonlab; Ar40 = P @ 8/14/13 11:22 AM @ argonlab; Ar39 = P @ 8/14/13 11:22 AM @ argonl…	Hole 28 (80-100 Mesh)	APPLLPAAAAAA	1	Pychron Script	1	Fusions CO2	4	4	0	4	0	30	30	153			0	327.365
	42	4	68.9375	-0.0027294	0.6031	1.39864	-	99.7391	894.325	0.823105								61735-42	CM-SS3	37	2013-08-13	16.2	3459255000		Sanidine	27	Iain Mason		129.138.12.160	7.875	H2 Baseline = A @ 8/14/13 11:22 AM @ argonlab; H1 Baseline = A @ 8/14/13 11:22 AM @ argonlab; AX Baseline = A @ 8/14/13 11:22 AM @ argonlab; L1 Baseline = A @ 8/14/13 11:22 AM @ argonlab; L2 Baseline = A @ 8/14/13 11:22 AM @ argonlab; CDD Baseline = A @ 8/14/13 11:22 AM @ argonlab; Ar41 = A @ 8/14/13 11:22 AM @ argonlab; Ar40 = P @ 8/14/13 11:22 AM @ argonlab; Ar39 = P @ 8/14/13 11:22 AM @ argonl…	Hole 28 (80-100 Mesh)	APPLLPAAAAAA	1	Pychron Script	1	Fusions CO2	4	4	0	4	0	30	30	139			0	1928.38
	27	4	70.5131	0.0191568	0.074	0.594836	26.633	99.9707	912.102	1.76733								61735-27	CM-SS3	37	2013-08-13	13.3333	3459245000		Sanidine	27	Iain Mason		129.138.12.160	7.875	H2 Baseline = A @ 8/14/13 11:22 AM @ argonlab; H1 Baseline = A @ 8/14/13 11:22 AM @ argonlab; AX Baseline = A @ 8/14/13 11:22 AM @ argonlab; L1 Baseline = A @ 8/14/13 11:22 AM @ argonlab; L2 Baseline = A @ 8/14/13 11:22 AM @ argonlab; CDD Baseline = A @ 8/14/13 11:22 AM @ argonlab; Ar41 = A @ 8/14/13 11:22 AM @ argonlab; Ar40 = P @ 8/14/13 11:22 AM @ argonlab; Ar39 = P @ 8/14/13 11:22 AM @ argonl…	Hole 28 (80-100 Mesh)	APPLLPAAAAAA	1	Pychron Script	1	Fusions CO2	4	4	0	4	0	30	30	124			0	838.886
	37	4	78.649	0.0129896	0.4815	0.962883	39.2779	99.8189	992.003	1.24635								61735-37	CM-SS3	37	2013-08-13	15.6833	3459253000		Sanidine	27	Iain Mason		129.138.12.160	7.875	H2 Baseline = A @ 8/14/13 11:22 AM @ argonlab; H1 Baseline = A @ 8/14/13 11:22 AM @ argonlab; AX Baseline = A @ 8/14/13 11:22 AM @ argonlab; L1 Baseline = A @ 8/14/13 11:22 AM @ argonlab; L2 Baseline = A @ 8/14/13 11:22 AM @ argonlab; CDD Baseline = A @ 8/14/13 11:22 AM @ argonlab; Ar41 = A @ 8/14/13 11:22 AM @ argonlab; Ar40 = P @ 8/14/13 11:22 AM @ argonlab; Ar39 = P @ 8/14/13 11:22 AM @ argonl…	Hole 28 (80-100 Mesh)	APPLLPAAAAAA	1	Pychron Script	1	Fusions CO2	4	4	0	4	0	30	30	134			0	1514.61
	30	4	81.024	0.016837	0.2076	0.582009	30.3025	99.925	1015.82	2.15863								61735-30	CM-SS3	37	2013-08-13	14.0833	3459248000		Sanidine	27	Iain Mason		129.138.12.160	7.875	H2 Baseline = A @ 8/14/13 11:22 AM @ argonlab; H1 Baseline = A @ 8/14/13 11:22 AM @ argonlab; AX Baseline = A @ 8/14/13 11:22 AM @ argonlab; L1 Baseline = A @ 8/14/13 11:22 AM @ argonlab; L2 Baseline = A @ 8/14/13 11:22 AM @ argonlab; CDD Baseline = A @ 8/14/13 11:22 AM @ argonlab; Ar41 = A @ 8/14/13 11:22 AM @ argonlab; Ar40 = P @ 8/14/13 11:22 AM @ argonlab; Ar39 = P @ 8/14/13 11:22 AM @ argonl…	Hole 28 (80-100 Mesh)	APPLLPAAAAAA	1	Pychron Script	1	Fusions CO2	4	4	0	4	0	30	30	127			0	943.145
	48	4	81.7154	0.0490977	0.2187	0.755639	10.3916	99.9252	1022.48	1.56892								61735-48	CM-SS3	37	2013-08-13	17.75	3459261000		Sanidine	27	Iain Mason		129.138.12.160	7.875	H2 Baseline = A @ 8/14/13 11:22 AM @ argonlab; H1 Baseline = A @ 8/14/13 11:22 AM @ argonlab; AX Baseline = A @ 8/14/13 11:22 AM @ argonlab; L1 Baseline = A @ 8/14/13 11:22 AM @ argonlab; L2 Baseline = A @ 8/14/13 11:22 AM @ argonlab; CDD Baseline = A @ 8/14/13 11:22 AM @ argonlab; Ar41 = A @ 8/14/13 11:22 AM @ argonlab; Ar40 = P @ 8/14/13 11:22 AM @ argonlab; Ar39 = P @ 8/14/13 11:22 AM @ argonl…	Hole 28 (80-100 Mesh)	APPLLPAAAAAA	1	Pychron Script	1	Fusions CO2	4	4	0	4	0	30	30	145			0	1234.99
	21	4	85.2141	0.0163262	0.8314	0.588078	31.2506	99.7105	1053.98	2.19787								61735-21	CM-SS3	37	2013-08-13	11.9667	3459240000		Sanidine	27	Iain Mason		129.138.12.160	7.875	H2 Baseline = A @ 8/14/13 11:22 AM @ argonlab; H1 Baseline = A @ 8/14/13 11:22 AM @ argonlab; AX Baseline = A @ 8/14/13 11:22 AM @ argonlab; L1 Baseline = A @ 8/14/13 11:22 AM @ argonlab; L2 Baseline = A @ 8/14/13 11:22 AM @ argonlab; CDD Baseline = A @ 8/14/13 11:22 AM @ argonlab; Ar41 = A @ 8/14/13 11:22 AM @ argonlab; Ar40 = P @ 8/14/13 11:22 AM @ argonlab; Ar39 = P @ 8/14/13 11:22 AM @ argonl…	Hole 28 (80-100 Mesh)	APPLLPAAAAAA	1	Pychron Script	1	Fusions CO2	4	4	0	4	0	30	30	118			0	1002.26
	15	4	85.5105	0.0052537	0.3664	1.09687	97.1133	99.8728	1058.06	1.14569								61735-15	CM-SS3	37	2013-08-13	11.1167	3459237000		Sanidine	27	Iain Mason		129.138.12.160	7.875	H2 Baseline = A @ 8/14/13 11:22 AM @ argonlab; H1 Baseline = A @ 8/14/13 11:22 AM @ argonlab; AX Baseline = A @ 8/14/13 11:22 AM @ argonlab; L1 Baseline = A @ 8/14/13 11:22 AM @ argonlab; L2 Baseline = A @ 8/14/13 11:22 AM @ argonlab; CDD Baseline = A @ 8/14/13 11:22 AM @ argonlab; Ar41 = A @ 8/14/13 11:22 AM @ argonlab; Ar40 = P @ 8/14/13 11:22 AM @ argonlab; Ar39 = P @ 8/14/13 11:22 AM @ argonl…	Hole 28 (80-100 Mesh)	APPLLPAAAAAA	1	Pychron Script	1	Fusions CO2	4	4	0	4	0	30	30	112			0	1875.88
	53	4	89.0624	0.022701	0.2535	0.868028	22.475	99.9172	1091.52	1.29181								61735-53	CM-SS3	37	2013-08-13	18.8167	3459265000		Sanidine	27	Iain Mason		129.138.12.160	7.875	H2 Baseline = A @ 8/14/13 11:22 AM @ argonlab; H1 Baseline = A @ 8/14/13 11:22 AM @ argonlab; AX Baseline = A @ 8/14/13 11:22 AM @ argonlab; L1 Baseline = A @ 8/14/13 11:22 AM @ argonlab; L2 Baseline = A @ 8/14/13 11:22 AM @ argonlab; CDD Baseline = A @ 8/14/13 11:22 AM @ argonlab; Ar41 = A @ 8/14/13 11:22 AM @ argonlab; Ar40 = P @ 8/14/13 11:22 AM @ argonlab; Ar39 = P @ 8/14/13 11:22 AM @ argonl…	Hole 28 (80-100 Mesh)	APPLLPAAAAAA	1	Pychron Script	1	Fusions CO2	4	4	0	4	0	30	30	150			0	1546.2
	52	4	95.2274	0.0040592	0.2878	1.48837	125.691	99.9103	1147.5	0.982544								61735-52	CM-SS3	37	2013-08-13	18.7	3459264000		Sanidine	27	Iain Mason		129.138.12.160	7.875	H2 Baseline = A @ 8/14/13 11:22 AM @ argonlab; H1 Baseline = A @ 8/14/13 11:22 AM @ argonlab; AX Baseline = A @ 8/14/13 11:22 AM @ argonlab; L1 Baseline = A @ 8/14/13 11:22 AM @ argonlab; L2 Baseline = A @ 8/14/13 11:22 AM @ argonlab; CDD Baseline = A @ 8/14/13 11:22 AM @ argonlab; Ar41 = A @ 8/14/13 11:22 AM @ argonlab; Ar40 = P @ 8/14/13 11:22 AM @ argonlab; Ar39 = P @ 8/14/13 11:22 AM @ argonl…	Hole 28 (80-100 Mesh)	APPLLPAAAAAA	1	Pychron Script	1	Fusions CO2	4	4	0	4	0	30	30	149			0	2834.68
	26	4	103.096	0.0109762	0.1728	1.50618	46.4828	99.951	1216.99	1.0401								61735-26	CM-SS3	37	2013-08-13	13.2333	3459244000		Sanidine	27	Iain Mason		129.138.12.160	7.875	H2 Baseline = A @ 8/14/13 11:22 AM @ argonlab; H1 Baseline = A @ 8/14/13 11:22 AM @ argonlab; AX Baseline = A @ 8/14/13 11:22 AM @ argonlab; L1 Baseline = A @ 8/14/13 11:22 AM @ argonlab; L2 Baseline = A @ 8/14/13 11:22 AM @ argonlab; CDD Baseline = A @ 8/14/13 11:22 AM @ argonlab; Ar41 = A @ 8/14/13 11:22 AM @ argonlab; Ar40 = P @ 8/14/13 11:22 AM @ argonlab; Ar39 = P @ 8/14/13 11:22 AM @ argonl…	Hole 28 (80-100 Mesh)	APPLLPAAAAAA	1	Pychron Script	1	Fusions CO2	4	4	0	4	0	30	30	123			0	3105.66
	11	4	104.012	0.0018041	0.1239	1.20329	282.803	99.9647	1224.99	1.1973								61735-11	CM-SS3	37	2013-08-13	10.2833	3459234000		Sanidine	27	Iain Mason		129.138.12.160	7.875	H2 Baseline = A @ 8/14/13 11:22 AM @ argonlab; H1 Baseline = A @ 8/14/13 11:22 AM @ argonlab; AX Baseline = A @ 8/14/13 11:22 AM @ argonlab; L1 Baseline = A @ 8/14/13 11:22 AM @ argonlab; L2 Baseline = A @ 8/14/13 11:22 AM @ argonlab; CDD Baseline = A @ 8/14/13 11:22 AM @ argonlab; Ar41 = A @ 8/14/13 11:22 AM @ argonlab; Ar40 = P @ 8/14/13 11:22 AM @ argonlab; Ar39 = P @ 8/14/13 11:22 AM @ argonl…	Hole 28 (80-100 Mesh)	APPLLPAAAAAA	1	Pychron Script	1	Fusions CO2	4	4	0	4	0	30	30	107			0	2503.15
	55	4	107.856	-0.0681798	0.4734	0.214288	-	99.8641	1256.75	5.75856								61735-55	CM-SS3	37	2013-08-13	19.2333	3459266000		Sanidine	27	Iain Mason		129.138.12.160	7.875	H2 Baseline = A @ 8/14/13 11:22 AM @ argonlab; H1 Baseline = A @ 8/14/13 11:22 AM @ argonlab; AX Baseline = A @ 8/14/13 11:22 AM @ argonlab; L1 Baseline = A @ 8/14/13 11:22 AM @ argonlab; L2 Baseline = A @ 8/14/13 11:22 AM @ argonlab; CDD Baseline = A @ 8/14/13 11:22 AM @ argonlab; Ar41 = A @ 8/14/13 11:22 AM @ argonlab; Ar40 = P @ 8/14/13 11:22 AM @ argonlab; Ar39 = P @ 8/14/13 11:22 AM @ argonl…	Hole 28 (80-100 Mesh)	APPLLPAAAAAA	1	Pychron Script	1	Fusions CO2	4	4	0	4	0	30	30	152			0	462.225
	04	4	129.643	0.0065845	0.7106	1.62336	77.4856	99.8374	1431.56	0.926797								61735-04	CM-SS3	37	2013-08-13	8.65	3459228000		Sanidine	27	Iain Mason		129.138.12.160	7.875	H2 Baseline = A @ 8/14/13 11:22 AM @ argonlab; H1 Baseline = A @ 8/14/13 11:22 AM @ argonlab; AX Baseline = A @ 8/14/13 11:22 AM @ argonlab; L1 Baseline = A @ 8/14/13 11:22 AM @ argonlab; L2 Baseline = A @ 8/14/13 11:22 AM @ argonlab; CDD Baseline = A @ 8/14/13 11:22 AM @ argonlab; Ar41 = A @ 8/14/13 11:22 AM @ argonlab; Ar40 = P @ 8/14/13 11:22 AM @ argonlab; Ar39 = P @ 8/14/13 11:22 AM @ argonl…	Hole 28 (80-100 Mesh)	APPLLPAAAAAA	1	Pychron Script	1	Fusions CO2	4	4	0	4	0	30	30	100			0	4209.16
	CM-SS3, Sanidine , J=0.0091716±0.01%, IC=1.05445±0.0011591, NM-258C, Lab#=61726, Argus VI
X	45	4	4.06213	-0.0027978	0.2746	0.502296	-	97.9767	65.5072	0.11965								61726-45	CM-SS3	37	2013-08-14	4.95	3459301000		Sanidine	2	Iain Mason		129.138.12.160	7.875	H2 Baseline = A @ 8/14/13 11:22 AM @ argonlab; H1 Baseline = A @ 8/14/13 11:22 AM @ argonlab; AX Baseline = A @ 8/14/13 11:22 AM @ argonlab; L1 Baseline = A @ 8/14/13 11:22 AM @ argonlab; L2 Baseline = A @ 8/14/13 11:22 AM @ argonlab; CDD Baseline = A @ 8/14/13 11:22 AM @ argonlab; Ar41 = A @ 8/14/13 11:22 AM @ argonlab; Ar40 = P @ 8/14/13 11:22 AM @ argonlab; Ar39 = P @ 8/14/13 11:22 AM @ argonl…	Hole 02 (80-100 Mesh)	APPLLPAAAAAA	1	Pychron Script	1	Fusions CO2	4	4	0	4	0	30	30	201			0	40.8077
	17	4	4.12587	0.0035857	0.1199	1.07418	142.289	99.1394	67.294	0.0572962								61726-17	CM-SS3	37	2013-08-13	23.1833	3459280000		Sanidine	2	Iain Mason		129.138.12.160	7.875	H2 Baseline = A @ 8/14/13 11:22 AM @ argonlab; H1 Baseline = A @ 8/14/13 11:22 AM @ argonlab; AX Baseline = A @ 8/14/13 11:22 AM @ argonlab; L1 Baseline = A @ 8/14/13 11:22 AM @ argonlab; L2 Baseline = A @ 8/14/13 11:22 AM @ argonlab; CDD Baseline = A @ 8/14/13 11:22 AM @ argonlab; Ar41 = A @ 8/14/13 11:22 AM @ argonlab; Ar40 = P @ 8/14/13 11:22 AM @ argonlab; Ar39 = P @ 8/14/13 11:22 AM @ argonl…	Hole 02 (80-100 Mesh)	APPLLPAAAAAA	1	Pychron Script	1	Fusions CO2	4	4	0	4	0	30	30	173			0	88.6392
	34	4	4.13826	0.0102951	0.00581677	1.24356	49.5579	99.9793	68.0543	0.0479623								61726-34	CM-SS3	37	2013-08-14	2.5	3459292000		Sanidine	2	Iain Mason		129.138.12.160	7.875	H2 Baseline = A @ 8/14/13 11:22 AM @ argonlab; H1 Baseline = A @ 8/14/13 11:22 AM @ argonlab; AX Baseline = A @ 8/14/13 11:22 AM @ argonlab; L1 Baseline = A @ 8/14/13 11:22 AM @ argonlab; L2 Baseline = A @ 8/14/13 11:22 AM @ argonlab; CDD Baseline = A @ 8/14/13 11:22 AM @ argonlab; Ar41 = A @ 8/14/13 11:22 AM @ argonlab; Ar40 = P @ 8/14/13 11:22 AM @ argonlab; Ar39 = P @ 8/14/13 11:22 AM @ argonl…	Hole 02 (80-100 Mesh)	APPLLPAAAAAA	1	Pychron Script	1	Fusions CO2	4	4	0	4	0	30	30	190			0	102.924
	35	4	4.23374	-0.0031966	0.0388	0.746727	-	99.7182	69.4188	0.0796569								61726-35	CM-SS3	37	2013-08-14	2.81667	3459293000		Sanidine	2	Iain Mason		129.138.12.160	7.875	H2 Baseline = A @ 8/14/13 11:22 AM @ argonlab; H1 Baseline = A @ 8/14/13 11:22 AM @ argonlab; AX Baseline = A @ 8/14/13 11:22 AM @ argonlab; L1 Baseline = A @ 8/14/13 11:22 AM @ argonlab; L2 Baseline = A @ 8/14/13 11:22 AM @ argonlab; CDD Baseline = A @ 8/14/13 11:22 AM @ argonlab; Ar41 = A @ 8/14/13 11:22 AM @ argonlab; Ar40 = P @ 8/14/13 11:22 AM @ argonlab; Ar39 = P @ 8/14/13 11:22 AM @ argonl…	Hole 02 (80-100 Mesh)	APPLLPAAAAAA	1	Pychron Script	1	Fusions CO2	4	4	0	4	0	30	30	191			0	63.2288
	28	4	4.31586	0.0153177	0.0499	0.91662	33.3081	99.6819	70.7176	0.190405								61726-28	CM-SS3	37	2013-08-14	1.21667	3459288000		Sanidine	2	Iain Mason		129.138.12.160	7.875	H2 Baseline = A @ 8/14/13 11:22 AM @ argonlab; H1 Baseline = A @ 8/14/13 11:22 AM @ argonlab; AX Baseline = A @ 8/14/13 11:22 AM @ argonlab; L1 Baseline = A @ 8/14/13 11:22 AM @ argonlab; L2 Baseline = A @ 8/14/13 11:22 AM @ argonlab; CDD Baseline = A @ 8/14/13 11:22 AM @ argonlab; Ar41 = A @ 8/14/13 11:22 AM @ argonlab; Ar40 = P @ 8/14/13 11:22 AM @ argonlab; Ar39 = P @ 8/14/13 11:22 AM @ argonl…	Hole 02 (80-100 Mesh)	APPLLPAAAAAA	1	Pychron Script	1	Fusions CO2	4	4	0	4	0	30	30	184			0	79.1208
	24	4	4.50391	0.0331173	0.1105	0.544311	15.406	99.3312	73.4894	0.32448								61726-24	CM-SS3	37	2013-08-14	0.35	3459285000		Sanidine	2	Iain Mason		129.138.12.160	7.875	H2 Baseline = A @ 8/14/13 11:22 AM @ argonlab; H1 Baseline = A @ 8/14/13 11:22 AM @ argonlab; AX Baseline = A @ 8/14/13 11:22 AM @ argonlab; L1 Baseline = A @ 8/14/13 11:22 AM @ argonlab; L2 Baseline = A @ 8/14/13 11:22 AM @ argonlab; CDD Baseline = A @ 8/14/13 11:22 AM @ argonlab; Ar41 = A @ 8/14/13 11:22 AM @ argonlab; Ar40 = P @ 8/14/13 11:22 AM @ argonlab; Ar39 = P @ 8/14/13 11:22 AM @ argonl…	Hole 02 (80-100 Mesh)	APPLLPAAAAAA	1	Pychron Script	1	Fusions CO2	4	4	0	4	0	30	30	180			0	49.0316
	30	4	4.5408	0.0075196	0.051	0.929693	67.8499	99.6807	74.3346	0.181857								61726-30	CM-SS3	37	2013-08-14	1.41667	3459288000		Sanidine	2	Iain Mason		129.138.12.160	7.875	H2 Baseline = A @ 8/14/13 11:22 AM @ argonlab; H1 Baseline = A @ 8/14/13 11:22 AM @ argonlab; AX Baseline = A @ 8/14/13 11:22 AM @ argonlab; L1 Baseline = A @ 8/14/13 11:22 AM @ argonlab; L2 Baseline = A @ 8/14/13 11:22 AM @ argonlab; CDD Baseline = A @ 8/14/13 11:22 AM @ argonlab; Ar41 = A @ 8/14/13 11:22 AM @ argonlab; Ar40 = P @ 8/14/13 11:22 AM @ argonlab; Ar39 = P @ 8/14/13 11:22 AM @ argonl…	Hole 02 (80-100 Mesh)	APPLLPAAAAAA	1	Pychron Script	1	Fusions CO2	4	4	0	4	0	30	30	186			0	84.4315
	33	4	4.59991	0.0012551	0.0306	0.584108	406.505	99.8	75.3722	0.288634								61726-33	CM-SS3	37	2013-08-14	2.16667	3459291000		Sanidine	2	Iain Mason		129.138.12.160	7.875	H2 Baseline = A @ 8/14/13 11:22 AM @ argonlab; H1 Baseline = A @ 8/14/13 11:22 AM @ argonlab; AX Baseline = A @ 8/14/13 11:22 AM @ argonlab; L1 Baseline = A @ 8/14/13 11:22 AM @ argonlab; L2 Baseline = A @ 8/14/13 11:22 AM @ argonlab; CDD Baseline = A @ 8/14/13 11:22 AM @ argonlab; Ar41 = A @ 8/14/13 11:22 AM @ argonlab; Ar40 = P @ 8/14/13 11:22 AM @ argonlab; Ar39 = P @ 8/14/13 11:22 AM @ argonl…	Hole 02 (80-100 Mesh)	APPLLPAAAAAA	1	Pychron Script	1	Fusions CO2	4	4	0	4	0	30	30	189			0	53.737
	44	4	4.62338	0.0250713	0.00577945	0.685994	20.3501	100.007	75.9045	0.239295								61726-44	CM-SS3	37	2013-08-14	4.4	3459299000		Sanidine	2	Iain Mason		129.138.12.160	7.875	H2 Baseline = A @ 8/14/13 11:22 AM @ argonlab; H1 Baseline = A @ 8/14/13 11:22 AM @ argonlab; AX Baseline = A @ 8/14/13 11:22 AM @ argonlab; L1 Baseline = A @ 8/14/13 11:22 AM @ argonlab; L2 Baseline = A @ 8/14/13 11:22 AM @ argonlab; CDD Baseline = A @ 8/14/13 11:22 AM @ argonlab; Ar41 = A @ 8/14/13 11:22 AM @ argonlab; Ar40 = P @ 8/14/13 11:22 AM @ argonlab; Ar39 = P @ 8/14/13 11:22 AM @ argonl…	Hole 02 (80-100 Mesh)	APPLLPAAAAAA	1	Pychron Script	1	Fusions CO2	4	4	0	4	0	30	30	200			0	63.4332
	21	4	4.84631	9.22e-05	0.0437	0.992003	5533.67	99.7315	79.2764	0.200067								61726-21	CM-SS3	37	2013-08-13	23.8333	3459283000		Sanidine	2	Iain Mason		129.138.12.160	7.875	H2 Baseline = A @ 8/14/13 11:22 AM @ argonlab; H1 Baseline = A @ 8/14/13 11:22 AM @ argonlab; AX Baseline = A @ 8/14/13 11:22 AM @ argonlab; L1 Baseline = A @ 8/14/13 11:22 AM @ argonlab; L2 Baseline = A @ 8/14/13 11:22 AM @ argonlab; CDD Baseline = A @ 8/14/13 11:22 AM @ argonlab; Ar41 = A @ 8/14/13 11:22 AM @ argonlab; Ar40 = P @ 8/14/13 11:22 AM @ argonlab; Ar39 = P @ 8/14/13 11:22 AM @ argonl…	Hole 02 (80-100 Mesh)	APPLLPAAAAAA	1	Pychron Script	1	Fusions CO2	4	4	0	4	0	30	30	177			0	96.151
	25	4	4.96119	-0.0150719	0.071	0.285428	-	99.5459	80.969	0.629461								61726-25	CM-SS3	37	2013-08-14	0.683333	3459286000		Sanidine	2	Iain Mason		129.138.12.160	7.875	H2 Baseline = A @ 8/14/13 11:22 AM @ argonlab; H1 Baseline = A @ 8/14/13 11:22 AM @ argonlab; AX Baseline = A @ 8/14/13 11:22 AM @ argonlab; L1 Baseline = A @ 8/14/13 11:22 AM @ argonlab; L2 Baseline = A @ 8/14/13 11:22 AM @ argonlab; CDD Baseline = A @ 8/14/13 11:22 AM @ argonlab; Ar41 = A @ 8/14/13 11:22 AM @ argonlab; Ar40 = P @ 8/14/13 11:22 AM @ argonlab; Ar39 = P @ 8/14/13 11:22 AM @ argonl…	Hole 02 (80-100 Mesh)	APPLLPAAAAAA	1	Pychron Script	1	Fusions CO2	4	4	0	4	0	30	30	181			0	28.321
	52	4	5.59581	-0.0010373	0.228	1.12271	-	98.7839	90.4084	0.216306								61726-52	CM-SS3	37	2013-08-14	6.11667	3459305000		Sanidine	2	Iain Mason		129.138.12.160	7.875	H2 Baseline = A @ 8/14/13 11:22 AM @ argonlab; H1 Baseline = A @ 8/14/13 11:22 AM @ argonlab; AX Baseline = A @ 8/14/13 11:22 AM @ argonlab; L1 Baseline = A @ 8/14/13 11:22 AM @ argonlab; L2 Baseline = A @ 8/14/13 11:22 AM @ argonlab; CDD Baseline = A @ 8/14/13 11:22 AM @ argonlab; Ar41 = A @ 8/14/13 11:22 AM @ argonlab; Ar40 = P @ 8/14/13 11:22 AM @ argonlab; Ar39 = P @ 8/14/13 11:22 AM @ argonl…	Hole 02 (80-100 Mesh)	APPLLPAAAAAA	1	Pychron Script	1	Fusions CO2	4	4	0	4	0	30	30	208			0	125.65
	08	4	6.51964	0.0055923	0.5669	1.19698	91.2333	97.4163	103.522	0.214195								61726-08	CM-SS3	37	2013-08-13	21.3667	3459274000		Sanidine	2	Iain Mason		129.138.12.160	7.875	H2 Baseline = A @ 8/14/13 11:22 AM @ argonlab; H1 Baseline = A @ 8/14/13 11:22 AM @ argonlab; AX Baseline = A @ 8/14/13 11:22 AM @ argonlab; L1 Baseline = A @ 8/14/13 11:22 AM @ argonlab; L2 Baseline = A @ 8/14/13 11:22 AM @ argonlab; CDD Baseline = A @ 8/14/13 11:22 AM @ argonlab; Ar41 = A @ 8/14/13 11:22 AM @ argonlab; Ar40 = P @ 8/14/13 11:22 AM @ argonlab; Ar39 = P @ 8/14/13 11:22 AM @ argonl…	Hole 02 (80-100 Mesh)	APPLLPAAAAAA	1	Pychron Script	1	Fusions CO2	4	4	0	4	0	30	30	164			0	156.078
	53	4	7.2031	0.00804	0.8299	0.716672	63.4582	96.5709	113.095	0.327294								61726-53	CM-SS3	37	2013-08-14	6.21667	3459306000		Sanidine	2	Iain Mason		129.138.12.160	7.875	H2 Baseline = A @ 8/14/13 11:22 AM @ argonlab; H1 Baseline = A @ 8/14/13 11:22 AM @ argonlab; AX Baseline = A @ 8/14/13 11:22 AM @ argonlab; L1 Baseline = A @ 8/14/13 11:22 AM @ argonlab; L2 Baseline = A @ 8/14/13 11:22 AM @ argonlab; CDD Baseline = A @ 8/14/13 11:22 AM @ argonlab; Ar41 = A @ 8/14/13 11:22 AM @ argonlab; Ar40 = P @ 8/14/13 11:22 AM @ argonlab; Ar39 = P @ 8/14/13 11:22 AM @ argonl…	Hole 02 (80-100 Mesh)	APPLLPAAAAAA	1	Pychron Script	1	Fusions CO2	4	4	0	4	0	30	30	209			0	103.246
	65	4	8.75048	-0.0913323	0.7834	0.168735	-	97.2494	137.444	1.43623								61726-65	CM-SS3	37	2013-08-14	8.13333	3459312000		Sanidine	2	Iain Mason		129.138.12.160	7.875	H2 Baseline = A @ 8/14/13 11:22 AM @ argonlab; H1 Baseline = A @ 8/14/13 11:22 AM @ argonlab; AX Baseline = A @ 8/14/13 11:22 AM @ argonlab; L1 Baseline = A @ 8/14/13 11:22 AM @ argonlab; L2 Baseline = A @ 8/14/13 11:22 AM @ argonlab; CDD Baseline = A @ 8/14/13 11:22 AM @ argonlab; Ar41 = A @ 8/14/13 11:22 AM @ argonlab; Ar40 = P @ 8/14/13 11:22 AM @ argonlab; Ar39 = P @ 8/14/13 11:22 AM @ argonl…	Hole 02 (80-100 Mesh)	APPLLPAAAAAA	1	Pychron Script	1	Fusions CO2	4	4	0	4	0	30	30	221			0	29.5285
	23	4	8.77082	0.0165826	0.0491	1.2341	30.7674	99.8493	141.306	0.21787								61726-23	CM-SS3	37	2013-08-14	0.25	3459284000		Sanidine	2	Iain Mason		129.138.12.160	7.875	H2 Baseline = A @ 8/14/13 11:22 AM @ argonlab; H1 Baseline = A @ 8/14/13 11:22 AM @ argonlab; AX Baseline = A @ 8/14/13 11:22 AM @ argonlab; L1 Baseline = A @ 8/14/13 11:22 AM @ argonlab; L2 Baseline = A @ 8/14/13 11:22 AM @ argonlab; CDD Baseline = A @ 8/14/13 11:22 AM @ argonlab; Ar41 = A @ 8/14/13 11:22 AM @ argonlab; Ar40 = P @ 8/14/13 11:22 AM @ argonlab; Ar39 = P @ 8/14/13 11:22 AM @ argonl…	Hole 02 (80-100 Mesh)	APPLLPAAAAAA	1	Pychron Script	1	Fusions CO2	4	4	0	4	0	30	30	179			0	216.484
	14	4	10.3044	7.19e-05	0.2128	1.27101	7096.02	99.385	164.215	0.209803								61726-14	CM-SS3	37	2013-08-13	22.45	3459278000		Sanidine	2	Iain Mason		129.138.12.160	7.875	H2 Baseline = A @ 8/14/13 11:22 AM @ argonlab; H1 Baseline = A @ 8/14/13 11:22 AM @ argonlab; AX Baseline = A @ 8/14/13 11:22 AM @ argonlab; L1 Baseline = A @ 8/14/13 11:22 AM @ argonlab; L2 Baseline = A @ 8/14/13 11:22 AM @ argonlab; CDD Baseline = A @ 8/14/13 11:22 AM @ argonlab; Ar41 = A @ 8/14/13 11:22 AM @ argonlab; Ar40 = P @ 8/14/13 11:22 AM @ argonlab; Ar39 = P @ 8/14/13 11:22 AM @ argonl…	Hole 02 (80-100 Mesh)	APPLLPAAAAAA	1	Pychron Script	1	Fusions CO2	4	4	0	4	0	30	30	170			0	261.939
	56	4	10.448	0.0029175	0.3487	1.15628	174.877	99.0076	165.801	0.246822								61726-56	CM-SS3	37	2013-08-14	6.95	3459308000		Sanidine	2	Iain Mason		129.138.12.160	7.875	H2 Baseline = A @ 8/14/13 11:22 AM @ argonlab; H1 Baseline = A @ 8/14/13 11:22 AM @ argonlab; AX Baseline = A @ 8/14/13 11:22 AM @ argonlab; L1 Baseline = A @ 8/14/13 11:22 AM @ argonlab; L2 Baseline = A @ 8/14/13 11:22 AM @ argonlab; CDD Baseline = A @ 8/14/13 11:22 AM @ argonlab; Ar41 = A @ 8/14/13 11:22 AM @ argonlab; Ar40 = P @ 8/14/13 11:22 AM @ argonlab; Ar39 = P @ 8/14/13 11:22 AM @ argonl…	Hole 02 (80-100 Mesh)	APPLLPAAAAAA	1	Pychron Script	1	Fusions CO2	4	4	0	4	0	30	30	212			0	241.618
	58	4	12.3285	0.0033018	0.0304	1.92332	154.523	99.9296	195.845	0.210544								61726-58	CM-SS3	37	2013-08-14	7.38333	3459310000		Sanidine	2	Iain Mason		129.138.12.160	7.875	H2 Baseline = A @ 8/14/13 11:22 AM @ argonlab; H1 Baseline = A @ 8/14/13 11:22 AM @ argonlab; AX Baseline = A @ 8/14/13 11:22 AM @ argonlab; L1 Baseline = A @ 8/14/13 11:22 AM @ argonlab; L2 Baseline = A @ 8/14/13 11:22 AM @ argonlab; CDD Baseline = A @ 8/14/13 11:22 AM @ argonlab; Ar41 = A @ 8/14/13 11:22 AM @ argonlab; Ar40 = P @ 8/14/13 11:22 AM @ argonlab; Ar39 = P @ 8/14/13 11:22 AM @ argonl…	Hole 02 (80-100 Mesh)	APPLLPAAAAAA	1	Pychron Script	1	Fusions CO2	4	4	0	4	0	30	30	214			0	474.232
	26	4	12.7992	0.0077495	0.2503	1.01207	65.837	99.422	201.952	0.331223								61726-26	CM-SS3	37	2013-08-14	1	3459287000		Sanidine	2	Iain Mason		129.138.12.160	7.875	H2 Baseline = A @ 8/14/13 11:22 AM @ argonlab; H1 Baseline = A @ 8/14/13 11:22 AM @ argonlab; AX Baseline = A @ 8/14/13 11:22 AM @ argonlab; L1 Baseline = A @ 8/14/13 11:22 AM @ argonlab; L2 Baseline = A @ 8/14/13 11:22 AM @ argonlab; CDD Baseline = A @ 8/14/13 11:22 AM @ argonlab; Ar41 = A @ 8/14/13 11:22 AM @ argonlab; Ar40 = P @ 8/14/13 11:22 AM @ argonlab; Ar39 = P @ 8/14/13 11:22 AM @ argonl…	Hole 02 (80-100 Mesh)	APPLLPAAAAAA	1	Pychron Script	1	Fusions CO2	4	4	0	4	0	30	30	182			0	259.075
	36	4	13.1494	-0.007703	0.145	0.853288	-	99.6659	207.658	0.385897								61726-36	CM-SS3	37	2013-08-14	3.11667	3459294000		Sanidine	2	Iain Mason		129.138.12.160	7.875	H2 Baseline = A @ 8/14/13 11:22 AM @ argonlab; H1 Baseline = A @ 8/14/13 11:22 AM @ argonlab; AX Baseline = A @ 8/14/13 11:22 AM @ argonlab; L1 Baseline = A @ 8/14/13 11:22 AM @ argonlab; L2 Baseline = A @ 8/14/13 11:22 AM @ argonlab; CDD Baseline = A @ 8/14/13 11:22 AM @ argonlab; Ar41 = A @ 8/14/13 11:22 AM @ argonlab; Ar40 = P @ 8/14/13 11:22 AM @ argonlab; Ar39 = P @ 8/14/13 11:22 AM @ argonl…	Hole 02 (80-100 Mesh)	APPLLPAAAAAA	1	Pychron Script	1	Fusions CO2	4	4	0	4	0	30	30	192			0	224.403
	63	4	13.3676	-0.0104911	0.1613	1.28431	-	99.6353	210.853	0.316051								61726-63	CM-SS3	37	2013-08-14	7.91667	3459312000		Sanidine	2	Iain Mason		129.138.12.160	7.875	H2 Baseline = A @ 8/14/13 11:22 AM @ argonlab; H1 Baseline = A @ 8/14/13 11:22 AM @ argonlab; AX Baseline = A @ 8/14/13 11:22 AM @ argonlab; L1 Baseline = A @ 8/14/13 11:22 AM @ argonlab; L2 Baseline = A @ 8/14/13 11:22 AM @ argonlab; CDD Baseline = A @ 8/14/13 11:22 AM @ argonlab; Ar41 = A @ 8/14/13 11:22 AM @ argonlab; Ar40 = P @ 8/14/13 11:22 AM @ argonlab; Ar39 = P @ 8/14/13 11:22 AM @ argonl…	Hole 02 (80-100 Mesh)	APPLLPAAAAAA	1	Pychron Script	1	Fusions CO2	4	4	0	4	0	30	30	219			0	343.361
	57	4	13.7496	0.0102325	0.00350908	1.18994	49.8611	99.998	217.285	0.292767								61726-57	CM-SS3	37	2013-08-14	7.06667	3459309000		Sanidine	2	Iain Mason		129.138.12.160	7.875	H2 Baseline = A @ 8/14/13 11:22 AM @ argonlab; H1 Baseline = A @ 8/14/13 11:22 AM @ argonlab; AX Baseline = A @ 8/14/13 11:22 AM @ argonlab; L1 Baseline = A @ 8/14/13 11:22 AM @ argonlab; L2 Baseline = A @ 8/14/13 11:22 AM @ argonlab; CDD Baseline = A @ 8/14/13 11:22 AM @ argonlab; Ar41 = A @ 8/14/13 11:22 AM @ argonlab; Ar40 = P @ 8/14/13 11:22 AM @ argonlab; Ar39 = P @ 8/14/13 11:22 AM @ argonl…	Hole 02 (80-100 Mesh)	APPLLPAAAAAA	1	Pychron Script	1	Fusions CO2	4	4	0	4	0	30	30	213			0	327.226
	41	4	14.6297	0.0023411	0.349	1.0584	217.933	99.2902	228.826	0.364185								61726-41	CM-SS3	37	2013-08-14	3.88333	3459297000		Sanidine	2	Iain Mason		129.138.12.160	7.875	H2 Baseline = A @ 8/14/13 11:22 AM @ argonlab; H1 Baseline = A @ 8/14/13 11:22 AM @ argonlab; AX Baseline = A @ 8/14/13 11:22 AM @ argonlab; L1 Baseline = A @ 8/14/13 11:22 AM @ argonlab; L2 Baseline = A @ 8/14/13 11:22 AM @ argonlab; CDD Baseline = A @ 8/14/13 11:22 AM @ argonlab; Ar41 = A @ 8/14/13 11:22 AM @ argonlab; Ar40 = P @ 8/14/13 11:22 AM @ argonlab; Ar39 = P @ 8/14/13 11:22 AM @ argonl…	Hole 02 (80-100 Mesh)	APPLLPAAAAAA	1	Pychron Script	1	Fusions CO2	4	4	0	4	0	30	30	197			0	309.682
	27	4	17.5472	-0.0205275	0.1194	1.19987	-	99.7882	272.51	0.362675								61726-27	CM-SS3	37	2013-08-14	1.1	3459287000		Sanidine	2	Iain Mason		129.138.12.160	7.875	H2 Baseline = A @ 8/14/13 11:22 AM @ argonlab; H1 Baseline = A @ 8/14/13 11:22 AM @ argonlab; AX Baseline = A @ 8/14/13 11:22 AM @ argonlab; L1 Baseline = A @ 8/14/13 11:22 AM @ argonlab; L2 Baseline = A @ 8/14/13 11:22 AM @ argonlab; CDD Baseline = A @ 8/14/13 11:22 AM @ argonlab; Ar41 = A @ 8/14/13 11:22 AM @ argonlab; Ar40 = P @ 8/14/13 11:22 AM @ argonlab; Ar39 = P @ 8/14/13 11:22 AM @ argonl…	Hole 02 (80-100 Mesh)	APPLLPAAAAAA	1	Pychron Script	1	Fusions CO2	4	4	0	4	0	30	30	183			0	421.084
	05	4	19.0071	0.0070725	0.3351	1.09657	72.1391	99.4776	292.624	0.401012								61726-05	CM-SS3	37	2013-08-13	20.85	3459272000		Sanidine	2	Iain Mason		129.138.12.160	7.875	H2 Baseline = A @ 8/14/13 11:22 AM @ argonlab; H1 Baseline = A @ 8/14/13 11:22 AM @ argonlab; AX Baseline = A @ 8/14/13 11:22 AM @ argonlab; L1 Baseline = A @ 8/14/13 11:22 AM @ argonlab; L2 Baseline = A @ 8/14/13 11:22 AM @ argonlab; CDD Baseline = A @ 8/14/13 11:22 AM @ argonlab; Ar41 = A @ 8/14/13 11:22 AM @ argonlab; Ar40 = P @ 8/14/13 11:22 AM @ argonlab; Ar39 = P @ 8/14/13 11:22 AM @ argonl…	Hole 02 (80-100 Mesh)	APPLLPAAAAAA	1	Pychron Script	1	Fusions CO2	4	4	0	4	0	30	30	161			0	416.855
	22	4	19.359	0.0120408	0.0692	1.07135	42.3729	99.8985	298.789	0.484072								61726-22	CM-SS3	37	2013-08-14	0.15	3459284000		Sanidine	2	Iain Mason		129.138.12.160	7.875	H2 Baseline = A @ 8/14/13 11:22 AM @ argonlab; H1 Baseline = A @ 8/14/13 11:22 AM @ argonlab; AX Baseline = A @ 8/14/13 11:22 AM @ argonlab; L1 Baseline = A @ 8/14/13 11:22 AM @ argonlab; L2 Baseline = A @ 8/14/13 11:22 AM @ argonlab; CDD Baseline = A @ 8/14/13 11:22 AM @ argonlab; Ar41 = A @ 8/14/13 11:22 AM @ argonlab; Ar40 = P @ 8/14/13 11:22 AM @ argonlab; Ar39 = P @ 8/14/13 11:22 AM @ argonl…	Hole 02 (80-100 Mesh)	APPLLPAAAAAA	1	Pychron Script	1	Fusions CO2	4	4	0	4	0	30	30	178			0	414.81
	47	4	20.0549	0.0036535	0.0414	0.905371	139.648	99.9405	308.794	0.507433								61726-47	CM-SS3	37	2013-08-14	5.36667	3459303000		Sanidine	2	Iain Mason		129.138.12.160	7.875	H2 Baseline = A @ 8/14/13 11:22 AM @ argonlab; H1 Baseline = A @ 8/14/13 11:22 AM @ argonlab; AX Baseline = A @ 8/14/13 11:22 AM @ argonlab; L1 Baseline = A @ 8/14/13 11:22 AM @ argonlab; L2 Baseline = A @ 8/14/13 11:22 AM @ argonlab; CDD Baseline = A @ 8/14/13 11:22 AM @ argonlab; Ar41 = A @ 8/14/13 11:22 AM @ argonlab; Ar40 = P @ 8/14/13 11:22 AM @ argonlab; Ar39 = P @ 8/14/13 11:22 AM @ argonl…	Hole 02 (80-100 Mesh)	APPLLPAAAAAA	1	Pychron Script	1	Fusions CO2	4	4	0	4	0	30	30	203			0	363.144
	54	4	21.3221	0.0094776	0.0585	1.12224	53.8326	99.922	326.613	0.442758								61726-54	CM-SS3	37	2013-08-14	6.33333	3459306000		Sanidine	2	Iain Mason		129.138.12.160	7.875	H2 Baseline = A @ 8/14/13 11:22 AM @ argonlab; H1 Baseline = A @ 8/14/13 11:22 AM @ argonlab; AX Baseline = A @ 8/14/13 11:22 AM @ argonlab; L1 Baseline = A @ 8/14/13 11:22 AM @ argonlab; L2 Baseline = A @ 8/14/13 11:22 AM @ argonlab; CDD Baseline = A @ 8/14/13 11:22 AM @ argonlab; Ar41 = A @ 8/14/13 11:22 AM @ argonlab; Ar40 = P @ 8/14/13 11:22 AM @ argonlab; Ar39 = P @ 8/14/13 11:22 AM @ argonl…	Hole 02 (80-100 Mesh)	APPLLPAAAAAA	1	Pychron Script	1	Fusions CO2	4	4	0	4	0	30	30	210			0	478.572
	19	4	24.4133	-0.001597	0.0562	1.88976	-	99.9314	369.519	0.338787								61726-19	CM-SS3	37	2013-08-13	23.6167	3459282000		Sanidine	2	Iain Mason		129.138.12.160	7.875	H2 Baseline = A @ 8/14/13 11:22 AM @ argonlab; H1 Baseline = A @ 8/14/13 11:22 AM @ argonlab; AX Baseline = A @ 8/14/13 11:22 AM @ argonlab; L1 Baseline = A @ 8/14/13 11:22 AM @ argonlab; L2 Baseline = A @ 8/14/13 11:22 AM @ argonlab; CDD Baseline = A @ 8/14/13 11:22 AM @ argonlab; Ar41 = A @ 8/14/13 11:22 AM @ argonlab; Ar40 = P @ 8/14/13 11:22 AM @ argonlab; Ar39 = P @ 8/14/13 11:22 AM @ argonl…	Hole 02 (80-100 Mesh)	APPLLPAAAAAA	1	Pychron Script	1	Fusions CO2	4	4	0	4	0	30	30	175			0	922.704
	15	4	25.269	0.0066375	0.797	0.380845	76.8669	99.0616	378.216	1.35576								61726-15	CM-SS3	37	2013-08-13	22.55	3459278000		Sanidine	2	Iain Mason		129.138.12.160	7.875	H2 Baseline = A @ 8/14/13 11:22 AM @ argonlab; H1 Baseline = A @ 8/14/13 11:22 AM @ argonlab; AX Baseline = A @ 8/14/13 11:22 AM @ argonlab; L1 Baseline = A @ 8/14/13 11:22 AM @ argonlab; L2 Baseline = A @ 8/14/13 11:22 AM @ argonlab; CDD Baseline = A @ 8/14/13 11:22 AM @ argonlab; Ar41 = A @ 8/14/13 11:22 AM @ argonlab; Ar40 = P @ 8/14/13 11:22 AM @ argonlab; Ar39 = P @ 8/14/13 11:22 AM @ argonl…	Hole 02 (80-100 Mesh)	APPLLPAAAAAA	1	Pychron Script	1	Fusions CO2	4	4	0	4	0	30	30	171			0	192.472
	03	4	28.7621	-0.0096359	0.0398	0.801419	-	99.9553	428.28	0.826693								61726-03	CM-SS3	37	2013-08-13	20.4167	3459270000		Sanidine	2	Iain Mason		129.138.12.160	7.875	H2 Baseline = A @ 8/14/13 11:22 AM @ argonlab; H1 Baseline = A @ 8/14/13 11:22 AM @ argonlab; AX Baseline = A @ 8/14/13 11:22 AM @ argonlab; L1 Baseline = A @ 8/14/13 11:22 AM @ argonlab; L2 Baseline = A @ 8/14/13 11:22 AM @ argonlab; CDD Baseline = A @ 8/14/13 11:22 AM @ argonlab; Ar41 = A @ 8/14/13 11:22 AM @ argonlab; Ar40 = P @ 8/14/13 11:22 AM @ argonlab; Ar39 = P @ 8/14/13 11:22 AM @ argonl…	Hole 02 (80-100 Mesh)	APPLLPAAAAAA	1	Pychron Script	1	Fusions CO2	4	4	0	4	0	30	30	159			0	461.007
	20	4	29.2012	0.0488575	0.0658	0.301371	10.4427	99.9449	434.076	2.0318								61726-20	CM-SS3	37	2013-08-13	23.7333	3459282000		Sanidine	2	Iain Mason		129.138.12.160	7.875	H2 Baseline = A @ 8/14/13 11:22 AM @ argonlab; H1 Baseline = A @ 8/14/13 11:22 AM @ argonlab; AX Baseline = A @ 8/14/13 11:22 AM @ argonlab; L1 Baseline = A @ 8/14/13 11:22 AM @ argonlab; L2 Baseline = A @ 8/14/13 11:22 AM @ argonlab; CDD Baseline = A @ 8/14/13 11:22 AM @ argonlab; Ar41 = A @ 8/14/13 11:22 AM @ argonlab; Ar40 = P @ 8/14/13 11:22 AM @ argonlab; Ar39 = P @ 8/14/13 11:22 AM @ argonl…	Hole 02 (80-100 Mesh)	APPLLPAAAAAA	1	Pychron Script	1	Fusions CO2	4	4	0	4	0	30	30	176			0	176.013
	04	4	30.5405	-0.0037819	0.000874359	1.39893	-	99.9982	451.92	0.429867								61726-04	CM-SS3	37	2013-08-13	20.5167	3459271000		Sanidine	2	Iain Mason		129.138.12.160	7.875	H2 Baseline = A @ 8/14/13 11:22 AM @ argonlab; H1 Baseline = A @ 8/14/13 11:22 AM @ argonlab; AX Baseline = A @ 8/14/13 11:22 AM @ argonlab; L1 Baseline = A @ 8/14/13 11:22 AM @ argonlab; L2 Baseline = A @ 8/14/13 11:22 AM @ argonlab; CDD Baseline = A @ 8/14/13 11:22 AM @ argonlab; Ar41 = A @ 8/14/13 11:22 AM @ argonlab; Ar40 = P @ 8/14/13 11:22 AM @ argonlab; Ar39 = P @ 8/14/13 11:22 AM @ argonl…	Hole 02 (80-100 Mesh)	APPLLPAAAAAA	1	Pychron Script	1	Fusions CO2	4	4	0	4	0	30	30	160			0	854.478
	31	4	32.0119	-0.0013964	0.0815	1.07136	-	99.9234	470.807	0.616131								61726-31	CM-SS3	37	2013-08-14	1.53333	3459289000		Sanidine	2	Iain Mason		129.138.12.160	7.875	H2 Baseline = A @ 8/14/13 11:22 AM @ argonlab; H1 Baseline = A @ 8/14/13 11:22 AM @ argonlab; AX Baseline = A @ 8/14/13 11:22 AM @ argonlab; L1 Baseline = A @ 8/14/13 11:22 AM @ argonlab; L2 Baseline = A @ 8/14/13 11:22 AM @ argonlab; CDD Baseline = A @ 8/14/13 11:22 AM @ argonlab; Ar41 = A @ 8/14/13 11:22 AM @ argonlab; Ar40 = P @ 8/14/13 11:22 AM @ argonlab; Ar39 = P @ 8/14/13 11:22 AM @ argonl…	Hole 02 (80-100 Mesh)	APPLLPAAAAAA	1	Pychron Script	1	Fusions CO2	4	4	0	4	0	30	30	187			0	685.926
	38	4	34.7004	-0.0027877	0.069	2.30382	-	99.9403	505.427	0.354803								61726-38	CM-SS3	37	2013-08-14	3.56667	3459296000		Sanidine	2	Iain Mason		129.138.12.160	7.875	H2 Baseline = A @ 8/14/13 11:22 AM @ argonlab; H1 Baseline = A @ 8/14/13 11:22 AM @ argonlab; AX Baseline = A @ 8/14/13 11:22 AM @ argonlab; L1 Baseline = A @ 8/14/13 11:22 AM @ argonlab; L2 Baseline = A @ 8/14/13 11:22 AM @ argonlab; CDD Baseline = A @ 8/14/13 11:22 AM @ argonlab; Ar41 = A @ 8/14/13 11:22 AM @ argonlab; Ar40 = P @ 8/14/13 11:22 AM @ argonlab; Ar39 = P @ 8/14/13 11:22 AM @ argonl…	Hole 02 (80-100 Mesh)	APPLLPAAAAAA	1	Pychron Script	1	Fusions CO2	4	4	0	4	0	30	30	194			0	1598.87
	51	4	35.0418	0.0028416	0.0528	0.991937	179.548	99.956	509.839	0.77633								61726-51	CM-SS3	37	2013-08-14	5.78333	3459304000		Sanidine	2	Iain Mason		129.138.12.160	7.875	H2 Baseline = A @ 8/14/13 11:22 AM @ argonlab; H1 Baseline = A @ 8/14/13 11:22 AM @ argonlab; AX Baseline = A @ 8/14/13 11:22 AM @ argonlab; L1 Baseline = A @ 8/14/13 11:22 AM @ argonlab; L2 Baseline = A @ 8/14/13 11:22 AM @ argonlab; CDD Baseline = A @ 8/14/13 11:22 AM @ argonlab; Ar41 = A @ 8/14/13 11:22 AM @ argonlab; Ar40 = P @ 8/14/13 11:22 AM @ argonlab; Ar39 = P @ 8/14/13 11:22 AM @ argonl…	Hole 02 (80-100 Mesh)	APPLLPAAAAAA	1	Pychron Script	1	Fusions CO2	4	4	0	4	0	30	30	207			0	695.187
	43	4	35.2212	0.0100872	0.0436	1.57416	50.5793	99.9658	512.162	0.505647								61726-43	CM-SS3	37	2013-08-14	4.08333	3459298000		Sanidine	2	Iain Mason		129.138.12.160	7.875	H2 Baseline = A @ 8/14/13 11:22 AM @ argonlab; H1 Baseline = A @ 8/14/13 11:22 AM @ argonlab; AX Baseline = A @ 8/14/13 11:22 AM @ argonlab; L1 Baseline = A @ 8/14/13 11:22 AM @ argonlab; L2 Baseline = A @ 8/14/13 11:22 AM @ argonlab; CDD Baseline = A @ 8/14/13 11:22 AM @ argonlab; Ar41 = A @ 8/14/13 11:22 AM @ argonlab; Ar40 = P @ 8/14/13 11:22 AM @ argonlab; Ar39 = P @ 8/14/13 11:22 AM @ argonl…	Hole 02 (80-100 Mesh)	APPLLPAAAAAA	1	Pychron Script	1	Fusions CO2	4	4	0	4	0	30	30	199			0	1108.88
	39	4	36.6787	0.0223634	0.4547	0.541574	22.8142	99.6354	529.041	1.38433								61726-39	CM-SS3	37	2013-08-14	3.66667	3459296000		Sanidine	2	Iain Mason		129.138.12.160	7.875	H2 Baseline = A @ 8/14/13 11:22 AM @ argonlab; H1 Baseline = A @ 8/14/13 11:22 AM @ argonlab; AX Baseline = A @ 8/14/13 11:22 AM @ argonlab; L1 Baseline = A @ 8/14/13 11:22 AM @ argonlab; L2 Baseline = A @ 8/14/13 11:22 AM @ argonlab; CDD Baseline = A @ 8/14/13 11:22 AM @ argonlab; Ar41 = A @ 8/14/13 11:22 AM @ argonlab; Ar40 = P @ 8/14/13 11:22 AM @ argonlab; Ar39 = P @ 8/14/13 11:22 AM @ argonl…	Hole 02 (80-100 Mesh)	APPLLPAAAAAA	1	Pychron Script	1	Fusions CO2	4	4	0	4	0	30	30	195			0	397.29
	50	4	40.4035	0.0024508	0.0528	2.32504	208.179	99.9618	576.734	0.423403								61726-50	CM-SS3	37	2013-08-14	5.68333	3459304000		Sanidine	2	Iain Mason		129.138.12.160	7.875	H2 Baseline = A @ 8/14/13 11:22 AM @ argonlab; H1 Baseline = A @ 8/14/13 11:22 AM @ argonlab; AX Baseline = A @ 8/14/13 11:22 AM @ argonlab; L1 Baseline = A @ 8/14/13 11:22 AM @ argonlab; L2 Baseline = A @ 8/14/13 11:22 AM @ argonlab; CDD Baseline = A @ 8/14/13 11:22 AM @ argonlab; Ar41 = A @ 8/14/13 11:22 AM @ argonlab; Ar40 = P @ 8/14/13 11:22 AM @ argonlab; Ar39 = P @ 8/14/13 11:22 AM @ argonl…	Hole 02 (80-100 Mesh)	APPLLPAAAAAA	1	Pychron Script	1	Fusions CO2	4	4	0	4	0	30	30	206			0	1878.8
	49	4	42.99	0.0088701	0.1841	0.56637	57.5195	99.8743	607.687	1.48343								61726-49	CM-SS3	37	2013-08-14	5.56667	3459303000		Sanidine	2	Iain Mason		129.138.12.160	7.875	H2 Baseline = A @ 8/14/13 11:22 AM @ argonlab; H1 Baseline = A @ 8/14/13 11:22 AM @ argonlab; AX Baseline = A @ 8/14/13 11:22 AM @ argonlab; L1 Baseline = A @ 8/14/13 11:22 AM @ argonlab; L2 Baseline = A @ 8/14/13 11:22 AM @ argonlab; CDD Baseline = A @ 8/14/13 11:22 AM @ argonlab; Ar41 = A @ 8/14/13 11:22 AM @ argonlab; Ar40 = P @ 8/14/13 11:22 AM @ argonlab; Ar39 = P @ 8/14/13 11:22 AM @ argonl…	Hole 02 (80-100 Mesh)	APPLLPAAAAAA	1	Pychron Script	1	Fusions CO2	4	4	0	4	0	30	30	205			0	486.967
	59	4	44.7434	-0.0217531	0.2284	1.0254	-	99.8444	628.492	0.766976								61726-59	CM-SS3	37	2013-08-14	7.5	3459310000		Sanidine	2	Iain Mason		129.138.12.160	7.875	H2 Baseline = A @ 8/14/13 11:22 AM @ argonlab; H1 Baseline = A @ 8/14/13 11:22 AM @ argonlab; AX Baseline = A @ 8/14/13 11:22 AM @ argonlab; L1 Baseline = A @ 8/14/13 11:22 AM @ argonlab; L2 Baseline = A @ 8/14/13 11:22 AM @ argonlab; CDD Baseline = A @ 8/14/13 11:22 AM @ argonlab; Ar41 = A @ 8/14/13 11:22 AM @ argonlab; Ar40 = P @ 8/14/13 11:22 AM @ argonlab; Ar39 = P @ 8/14/13 11:22 AM @ argonl…	Hole 02 (80-100 Mesh)	APPLLPAAAAAA	1	Pychron Script	1	Fusions CO2	4	4	0	4	0	30	30	215			0	917.585
	13	4	46.9831	0.0018672	0.0428	0.848033	273.246	99.9732	655.651	1.02184								61726-13	CM-SS3	37	2013-08-13	22.3333	3459277000		Sanidine	2	Iain Mason		129.138.12.160	7.875	H2 Baseline = A @ 8/14/13 11:22 AM @ argonlab; H1 Baseline = A @ 8/14/13 11:22 AM @ argonlab; AX Baseline = A @ 8/14/13 11:22 AM @ argonlab; L1 Baseline = A @ 8/14/13 11:22 AM @ argonlab; L2 Baseline = A @ 8/14/13 11:22 AM @ argonlab; CDD Baseline = A @ 8/14/13 11:22 AM @ argonlab; Ar41 = A @ 8/14/13 11:22 AM @ argonlab; Ar40 = P @ 8/14/13 11:22 AM @ argonlab; Ar39 = P @ 8/14/13 11:22 AM @ argonl…	Hole 02 (80-100 Mesh)	APPLLPAAAAAA	1	Pychron Script	1	Fusions CO2	4	4	0	4	0	30	30	169			0	796.866
	60	4	49.0063	0.0084058	0.4353	1.04399	60.6967	99.7366	677.892	0.725119								61726-60	CM-SS3	37	2013-08-14	7.6	3459311000		Sanidine	2	Iain Mason		129.138.12.160	7.875	H2 Baseline = A @ 8/14/13 11:22 AM @ argonlab; H1 Baseline = A @ 8/14/13 11:22 AM @ argonlab; AX Baseline = A @ 8/14/13 11:22 AM @ argonlab; L1 Baseline = A @ 8/14/13 11:22 AM @ argonlab; L2 Baseline = A @ 8/14/13 11:22 AM @ argonlab; CDD Baseline = A @ 8/14/13 11:22 AM @ argonlab; Ar41 = A @ 8/14/13 11:22 AM @ argonlab; Ar40 = P @ 8/14/13 11:22 AM @ argonlab; Ar39 = P @ 8/14/13 11:22 AM @ argonl…	Hole 02 (80-100 Mesh)	APPLLPAAAAAA	1	Pychron Script	1	Fusions CO2	4	4	0	4	0	30	30	216			0	1023.25
	10	4	50.8211	-0.0175565	0.0434	0.738426	-	99.9717	700.114	1.15755								61726-10	CM-SS3	37	2013-08-13	21.5833	3459275000		Sanidine	2	Iain Mason		129.138.12.160	7.875	H2 Baseline = A @ 8/14/13 11:22 AM @ argonlab; H1 Baseline = A @ 8/14/13 11:22 AM @ argonlab; AX Baseline = A @ 8/14/13 11:22 AM @ argonlab; L1 Baseline = A @ 8/14/13 11:22 AM @ argonlab; L2 Baseline = A @ 8/14/13 11:22 AM @ argonlab; CDD Baseline = A @ 8/14/13 11:22 AM @ argonlab; Ar41 = A @ 8/14/13 11:22 AM @ argonlab; Ar40 = P @ 8/14/13 11:22 AM @ argonlab; Ar39 = P @ 8/14/13 11:22 AM @ argonl…	Hole 02 (80-100 Mesh)	APPLLPAAAAAA	1	Pychron Script	1	Fusions CO2	4	4	0	4	0	30	30	166			0	750.544
	37	4	53.566	-0.0012665	0.1763	2.77607	-	99.9019	730.861	0.43169								61726-37	CM-SS3	37	2013-08-14	3.23333	3459295000		Sanidine	2	Iain Mason		129.138.12.160	7.875	H2 Baseline = A @ 8/14/13 11:22 AM @ argonlab; H1 Baseline = A @ 8/14/13 11:22 AM @ argonlab; AX Baseline = A @ 8/14/13 11:22 AM @ argonlab; L1 Baseline = A @ 8/14/13 11:22 AM @ argonlab; L2 Baseline = A @ 8/14/13 11:22 AM @ argonlab; CDD Baseline = A @ 8/14/13 11:22 AM @ argonlab; Ar41 = A @ 8/14/13 11:22 AM @ argonlab; Ar40 = P @ 8/14/13 11:22 AM @ argonlab; Ar39 = P @ 8/14/13 11:22 AM @ argonl…	Hole 02 (80-100 Mesh)	APPLLPAAAAAA	1	Pychron Script	1	Fusions CO2	4	4	0	4	0	30	30	193			0	2974.06
	48	4	54.5577	-0.0064783	0.7284	1.48936	-	99.6016	740.147	0.735121								61726-48	CM-SS3	37	2013-08-14	5.46667	3459303000		Sanidine	2	Iain Mason		129.138.12.160	7.875	H2 Baseline = A @ 8/14/13 11:22 AM @ argonlab; H1 Baseline = A @ 8/14/13 11:22 AM @ argonlab; AX Baseline = A @ 8/14/13 11:22 AM @ argonlab; L1 Baseline = A @ 8/14/13 11:22 AM @ argonlab; L2 Baseline = A @ 8/14/13 11:22 AM @ argonlab; CDD Baseline = A @ 8/14/13 11:22 AM @ argonlab; Ar41 = A @ 8/14/13 11:22 AM @ argonlab; Ar40 = P @ 8/14/13 11:22 AM @ argonlab; Ar39 = P @ 8/14/13 11:22 AM @ argonl…	Hole 02 (80-100 Mesh)	APPLLPAAAAAA	1	Pychron Script	1	Fusions CO2	4	4	0	4	0	30	30	204			0	1625.11
	62	4	56.6864	-0.0002894	0.0228	1.48486	-	99.9882	766.176	0.725867								61726-62	CM-SS3	37	2013-08-14	7.81667	3459311000		Sanidine	2	Iain Mason		129.138.12.160	7.875	H2 Baseline = A @ 8/14/13 11:22 AM @ argonlab; H1 Baseline = A @ 8/14/13 11:22 AM @ argonlab; AX Baseline = A @ 8/14/13 11:22 AM @ argonlab; L1 Baseline = A @ 8/14/13 11:22 AM @ argonlab; L2 Baseline = A @ 8/14/13 11:22 AM @ argonlab; CDD Baseline = A @ 8/14/13 11:22 AM @ argonlab; Ar41 = A @ 8/14/13 11:22 AM @ argonlab; Ar40 = P @ 8/14/13 11:22 AM @ argonlab; Ar39 = P @ 8/14/13 11:22 AM @ argonl…	Hole 02 (80-100 Mesh)	APPLLPAAAAAA	1	Pychron Script	1	Fusions CO2	4	4	0	4	0	30	30	218			0	1683.43
	46	4	59.2545	-0.0047056	0.1202	1.65961	-	99.939	794.005	0.746107								61726-46	CM-SS3	37	2013-08-14	5.26667	3459302000		Sanidine	2	Iain Mason		129.138.12.160	7.875	H2 Baseline = A @ 8/14/13 11:22 AM @ argonlab; H1 Baseline = A @ 8/14/13 11:22 AM @ argonlab; AX Baseline = A @ 8/14/13 11:22 AM @ argonlab; L1 Baseline = A @ 8/14/13 11:22 AM @ argonlab; L2 Baseline = A @ 8/14/13 11:22 AM @ argonlab; CDD Baseline = A @ 8/14/13 11:22 AM @ argonlab; Ar41 = A @ 8/14/13 11:22 AM @ argonlab; Ar40 = P @ 8/14/13 11:22 AM @ argonlab; Ar39 = P @ 8/14/13 11:22 AM @ argonl…	Hole 02 (80-100 Mesh)	APPLLPAAAAAA	1	Pychron Script	1	Fusions CO2	4	4	0	4	0	30	30	202			0	1966.78
	64	4	62.4642	-0.005206	0.2421	1.87493	-	99.8839	828.21	0.613306								61726-64	CM-SS3	37	2013-08-14	8.01667	3459312000		Sanidine	2	Iain Mason		129.138.12.160	7.875	H2 Baseline = A @ 8/14/13 11:22 AM @ argonlab; H1 Baseline = A @ 8/14/13 11:22 AM @ argonlab; AX Baseline = A @ 8/14/13 11:22 AM @ argonlab; L1 Baseline = A @ 8/14/13 11:22 AM @ argonlab; L2 Baseline = A @ 8/14/13 11:22 AM @ argonlab; CDD Baseline = A @ 8/14/13 11:22 AM @ argonlab; Ar41 = A @ 8/14/13 11:22 AM @ argonlab; Ar40 = P @ 8/14/13 11:22 AM @ argonlab; Ar39 = P @ 8/14/13 11:22 AM @ argonl…	Hole 02 (80-100 Mesh)	APPLLPAAAAAA	1	Pychron Script	1	Fusions CO2	4	4	0	4	0	30	30	220			0	2342.31
	06	4	63.3187	-0.018431	0.1112	0.660235	-	99.9455	837.71	1.29087								61726-06	CM-SS3	37	2013-08-13	21.1667	3459273000		Sanidine	2	Iain Mason		129.138.12.160	7.875	H2 Baseline = A @ 8/14/13 11:22 AM @ argonlab; H1 Baseline = A @ 8/14/13 11:22 AM @ argonlab; AX Baseline = A @ 8/14/13 11:22 AM @ argonlab; L1 Baseline = A @ 8/14/13 11:22 AM @ argonlab; L2 Baseline = A @ 8/14/13 11:22 AM @ argonlab; CDD Baseline = A @ 8/14/13 11:22 AM @ argonlab; Ar41 = A @ 8/14/13 11:22 AM @ argonlab; Ar40 = P @ 8/14/13 11:22 AM @ argonlab; Ar39 = P @ 8/14/13 11:22 AM @ argonl…	Hole 02 (80-100 Mesh)	APPLLPAAAAAA	1	Pychron Script	1	Fusions CO2	4	4	0	4	0	30	30	162			0	836.095
	40	4	65.628	0.0092478	0.465	1.9845	55.1703	99.7902	861.01	0.68238								61726-40	CM-SS3	37	2013-08-14	3.76667	3459297000		Sanidine	2	Iain Mason		129.138.12.160	7.875	H2 Baseline = A @ 8/14/13 11:22 AM @ argonlab; H1 Baseline = A @ 8/14/13 11:22 AM @ argonlab; AX Baseline = A @ 8/14/13 11:22 AM @ argonlab; L1 Baseline = A @ 8/14/13 11:22 AM @ argonlab; L2 Baseline = A @ 8/14/13 11:22 AM @ argonlab; CDD Baseline = A @ 8/14/13 11:22 AM @ argonlab; Ar41 = A @ 8/14/13 11:22 AM @ argonlab; Ar40 = P @ 8/14/13 11:22 AM @ argonlab; Ar39 = P @ 8/14/13 11:22 AM @ argonl…	Hole 02 (80-100 Mesh)	APPLLPAAAAAA	1	Pychron Script	1	Fusions CO2	4	4	0	4	0	30	30	196			0	2604.79
	55	4	67.0627	0.004644	0.1906	2.12584	109.863	99.916	876.841	0.629705								61726-55	CM-SS3	37	2013-08-14	6.63333	3459307000		Sanidine	2	Iain Mason		129.138.12.160	7.875	H2 Baseline = A @ 8/14/13 11:22 AM @ argonlab; H1 Baseline = A @ 8/14/13 11:22 AM @ argonlab; AX Baseline = A @ 8/14/13 11:22 AM @ argonlab; L1 Baseline = A @ 8/14/13 11:22 AM @ argonlab; L2 Baseline = A @ 8/14/13 11:22 AM @ argonlab; CDD Baseline = A @ 8/14/13 11:22 AM @ argonlab; Ar41 = A @ 8/14/13 11:22 AM @ argonlab; Ar40 = P @ 8/14/13 11:22 AM @ argonlab; Ar39 = P @ 8/14/13 11:22 AM @ argonl…	Hole 02 (80-100 Mesh)	APPLLPAAAAAA	1	Pychron Script	1	Fusions CO2	4	4	0	4	0	30	30	211			0	2851.3
	09	4	67.3688	0.0134163	0.0778	1.10002	38.0287	99.967	880.379	1.05845								61726-09	CM-SS3	37	2013-08-13	21.4667	3459274000		Sanidine	2	Iain Mason		129.138.12.160	7.875	H2 Baseline = A @ 8/14/13 11:22 AM @ argonlab; H1 Baseline = A @ 8/14/13 11:22 AM @ argonlab; AX Baseline = A @ 8/14/13 11:22 AM @ argonlab; L1 Baseline = A @ 8/14/13 11:22 AM @ argonlab; L2 Baseline = A @ 8/14/13 11:22 AM @ argonlab; CDD Baseline = A @ 8/14/13 11:22 AM @ argonlab; Ar41 = A @ 8/14/13 11:22 AM @ argonlab; Ar40 = P @ 8/14/13 11:22 AM @ argonlab; Ar39 = P @ 8/14/13 11:22 AM @ argonl…	Hole 02 (80-100 Mesh)	APPLLPAAAAAA	1	Pychron Script	1	Fusions CO2	4	4	0	4	0	30	30	165			0	1482.15
	18	4	69.6085	0.0032699	0.1891	2.69396	156.03	99.9195	903.126	0.484488								61726-18	CM-SS3	37	2013-08-13	23.5167	3459282000		Sanidine	2	Iain Mason		129.138.12.160	7.875	H2 Baseline = A @ 8/14/13 11:22 AM @ argonlab; H1 Baseline = A @ 8/14/13 11:22 AM @ argonlab; AX Baseline = A @ 8/14/13 11:22 AM @ argonlab; L1 Baseline = A @ 8/14/13 11:22 AM @ argonlab; L2 Baseline = A @ 8/14/13 11:22 AM @ argonlab; CDD Baseline = A @ 8/14/13 11:22 AM @ argonlab; Ar41 = A @ 8/14/13 11:22 AM @ argonlab; Ar40 = P @ 8/14/13 11:22 AM @ argonlab; Ar39 = P @ 8/14/13 11:22 AM @ argonl…	Hole 02 (80-100 Mesh)	APPLLPAAAAAA	1	Pychron Script	1	Fusions CO2	4	4	0	4	0	30	30	174			0	3750.46
	29	4	70.103	0.0117857	0.2106	0.717445	43.2901	99.9119	908.135	1.61123								61726-29	CM-SS3	37	2013-08-14	1.31667	3459288000		Sanidine	2	Iain Mason		129.138.12.160	7.875	H2 Baseline = A @ 8/14/13 11:22 AM @ argonlab; H1 Baseline = A @ 8/14/13 11:22 AM @ argonlab; AX Baseline = A @ 8/14/13 11:22 AM @ argonlab; L1 Baseline = A @ 8/14/13 11:22 AM @ argonlab; L2 Baseline = A @ 8/14/13 11:22 AM @ argonlab; CDD Baseline = A @ 8/14/13 11:22 AM @ argonlab; Ar41 = A @ 8/14/13 11:22 AM @ argonlab; Ar40 = P @ 8/14/13 11:22 AM @ argonlab; Ar39 = P @ 8/14/13 11:22 AM @ argonl…	Hole 02 (80-100 Mesh)	APPLLPAAAAAA	1	Pychron Script	1	Fusions CO2	4	4	0	4	0	30	30	185			0	1005.91
	16	4	70.7973	-0.0033519	0.6439	0.990668	-	99.7285	913.882	1.24743								61726-16	CM-SS3	37	2013-08-13	22.8667	3459279000		Sanidine	2	Iain Mason		129.138.12.160	7.875	H2 Baseline = A @ 8/14/13 11:22 AM @ argonlab; H1 Baseline = A @ 8/14/13 11:22 AM @ argonlab; AX Baseline = A @ 8/14/13 11:22 AM @ argonlab; L1 Baseline = A @ 8/14/13 11:22 AM @ argonlab; L2 Baseline = A @ 8/14/13 11:22 AM @ argonlab; CDD Baseline = A @ 8/14/13 11:22 AM @ argonlab; Ar41 = A @ 8/14/13 11:22 AM @ argonlab; Ar40 = P @ 8/14/13 11:22 AM @ argonlab; Ar39 = P @ 8/14/13 11:22 AM @ argonl…	Hole 02 (80-100 Mesh)	APPLLPAAAAAA	1	Pychron Script	1	Fusions CO2	4	4	0	4	0	30	30	172			0	1402.73
	01	4	75.1713	-0.0114709	0.4802	1.08914	-	99.8083	958.395	1.17748								61726-01	CM-SS3	37	2013-08-13	20.1833	3459270000		Sanidine	2	Iain Mason		129.138.12.160	7.875	H2 Baseline = A @ 8/14/13 11:22 AM @ argonlab; H1 Baseline = A @ 8/14/13 11:22 AM @ argonlab; AX Baseline = A @ 8/14/13 11:22 AM @ argonlab; L1 Baseline = A @ 8/14/13 11:22 AM @ argonlab; L2 Baseline = A @ 8/14/13 11:22 AM @ argonlab; CDD Baseline = A @ 8/14/13 11:22 AM @ argonlab; Ar41 = A @ 8/14/13 11:22 AM @ argonlab; Ar40 = P @ 8/14/13 11:22 AM @ argonlab; Ar39 = P @ 8/14/13 11:22 AM @ argonl…	Hole 02 (80-100 Mesh)	APPLLPAAAAAA	1	Pychron Script	1	Fusions CO2	4	4	0	4	0	30	30	157			0	1637.43
	61	4	82.8821	0.0072564	0.543	2.21595	70.3109	99.8056	1033.37	0.63227								61726-61	CM-SS3	37	2013-08-14	7.7	3459311000		Sanidine	2	Iain Mason		129.138.12.160	7.875	H2 Baseline = A @ 8/14/13 11:22 AM @ argonlab; H1 Baseline = A @ 8/14/13 11:22 AM @ argonlab; AX Baseline = A @ 8/14/13 11:22 AM @ argonlab; L1 Baseline = A @ 8/14/13 11:22 AM @ argonlab; L2 Baseline = A @ 8/14/13 11:22 AM @ argonlab; CDD Baseline = A @ 8/14/13 11:22 AM @ argonlab; Ar41 = A @ 8/14/13 11:22 AM @ argonlab; Ar40 = P @ 8/14/13 11:22 AM @ argonlab; Ar39 = P @ 8/14/13 11:22 AM @ argonl…	Hole 02 (80-100 Mesh)	APPLLPAAAAAA	1	Pychron Script	1	Fusions CO2	4	4	0	4	0	30	30	217			0	3673.27
	42	4	84.4086	-0.0035919	0.6538	1.35422	-	99.769	1047.56	0.984554								61726-42	CM-SS3	37	2013-08-14	3.98333	3459298000		Sanidine	2	Iain Mason		129.138.12.160	7.875	H2 Baseline = A @ 8/14/13 11:22 AM @ argonlab; H1 Baseline = A @ 8/14/13 11:22 AM @ argonlab; AX Baseline = A @ 8/14/13 11:22 AM @ argonlab; L1 Baseline = A @ 8/14/13 11:22 AM @ argonlab; L2 Baseline = A @ 8/14/13 11:22 AM @ argonlab; CDD Baseline = A @ 8/14/13 11:22 AM @ argonlab; Ar41 = A @ 8/14/13 11:22 AM @ argonlab; Ar40 = P @ 8/14/13 11:22 AM @ argonlab; Ar39 = P @ 8/14/13 11:22 AM @ argonl…	Hole 02 (80-100 Mesh)	APPLLPAAAAAA	1	Pychron Script	1	Fusions CO2	4	4	0	4	0	30	30	198			0	2286.14
	32	4	86.9436	-0.0085585	0.1887	1.21681	-	99.9345	1072.7	0.878814								61726-32	CM-SS3	37	2013-08-14	1.85	3459290000		Sanidine	2	Iain Mason		129.138.12.160	7.875	H2 Baseline = A @ 8/14/13 11:22 AM @ argonlab; H1 Baseline = A @ 8/14/13 11:22 AM @ argonlab; AX Baseline = A @ 8/14/13 11:22 AM @ argonlab; L1 Baseline = A @ 8/14/13 11:22 AM @ argonlab; L2 Baseline = A @ 8/14/13 11:22 AM @ argonlab; CDD Baseline = A @ 8/14/13 11:22 AM @ argonlab; Ar41 = A @ 8/14/13 11:22 AM @ argonlab; Ar40 = P @ 8/14/13 11:22 AM @ argonlab; Ar39 = P @ 8/14/13 11:22 AM @ argonl…	Hole 02 (80-100 Mesh)	APPLLPAAAAAA	1	Pychron Script	1	Fusions CO2	4	4	0	4	0	30	30	188			0	2115.86
	11	4	89.0152	0.021185	0.1395	0.442631	24.0833	99.9549	1092.13	2.71036								61726-11	CM-SS3	37	2013-08-13	22.1167	3459276000		Sanidine	2	Iain Mason		129.138.12.160	7.875	H2 Baseline = A @ 8/14/13 11:22 AM @ argonlab; H1 Baseline = A @ 8/14/13 11:22 AM @ argonlab; AX Baseline = A @ 8/14/13 11:22 AM @ argonlab; L1 Baseline = A @ 8/14/13 11:22 AM @ argonlab; L2 Baseline = A @ 8/14/13 11:22 AM @ argonlab; CDD Baseline = A @ 8/14/13 11:22 AM @ argonlab; Ar41 = A @ 8/14/13 11:22 AM @ argonlab; Ar40 = P @ 8/14/13 11:22 AM @ argonlab; Ar39 = P @ 8/14/13 11:22 AM @ argonl…	Hole 02 (80-100 Mesh)	APPLLPAAAAAA	1	Pychron Script	1	Fusions CO2	4	4	0	4	0	30	30	167			0	788.028
	07	4	92.1394	0.0055907	0.0782	1.70876	91.2594	99.9753	1120.93	0.816971								61726-07	CM-SS3	37	2013-08-13	21.2667	3459273000		Sanidine	2	Iain Mason		129.138.12.160	7.875	H2 Baseline = A @ 8/14/13 11:22 AM @ argonlab; H1 Baseline = A @ 8/14/13 11:22 AM @ argonlab; AX Baseline = A @ 8/14/13 11:22 AM @ argonlab; L1 Baseline = A @ 8/14/13 11:22 AM @ argonlab; L2 Baseline = A @ 8/14/13 11:22 AM @ argonlab; CDD Baseline = A @ 8/14/13 11:22 AM @ argonlab; Ar41 = A @ 8/14/13 11:22 AM @ argonlab; Ar40 = P @ 8/14/13 11:22 AM @ argonlab; Ar39 = P @ 8/14/13 11:22 AM @ argonl…	Hole 02 (80-100 Mesh)	APPLLPAAAAAA	1	Pychron Script	1	Fusions CO2	4	4	0	4	0	30	30	163			0	3148.9
	12	4	105.645	0.0055854	0.148	0.943087	91.346	99.9587	1239.71	1.49029								61726-12	CM-SS3	37	2013-08-13	22.2333	3459277000		Sanidine	2	Iain Mason		129.138.12.160	7.875	H2 Baseline = A @ 8/14/13 11:22 AM @ argonlab; H1 Baseline = A @ 8/14/13 11:22 AM @ argonlab; AX Baseline = A @ 8/14/13 11:22 AM @ argonlab; L1 Baseline = A @ 8/14/13 11:22 AM @ argonlab; L2 Baseline = A @ 8/14/13 11:22 AM @ argonlab; CDD Baseline = A @ 8/14/13 11:22 AM @ argonlab; Ar41 = A @ 8/14/13 11:22 AM @ argonlab; Ar40 = P @ 8/14/13 11:22 AM @ argonlab; Ar39 = P @ 8/14/13 11:22 AM @ argonl…	Hole 02 (80-100 Mesh)	APPLLPAAAAAA	1	Pychron Script	1	Fusions CO2	4	4	0	4	0	30	30	168			0	1992.66
	CM-Ash2, Sanidine, J=0.0095068±0.28%, IC=1.056691±0.000774, NM-254E, Lab#=61412, Argus VI
X	11	3	3.8475	0.0045681	0.0417	0.315844	111.688	99.6834	65.42	0.218944								61412-11	CM-Ash2	35	2012-12-01	14.95	3437219000		Sanidine	3	Iain Mason		129.138.12.160	7.875	H1 Baseline = A @ 12/1/12 3:09 PM @ argus1; AX Baseline = A @ 12/1/12 3:09 PM @ argus1; L1 Baseline = A @ 12/1/12 3:09 PM @ argus1; L2 Baseline = A @ 12/1/12 3:09 PM @ argus1; CDD Baseline = A @ 12/1/12 3:09 PM @ argus1; H2 Baseline = A @ 12/1/12 3:09 PM @ argus1; Ar40 = P @ 12/1/12 3:09 PM @ argus1; Ar39 = P @ 12/1/12 3:09 PM @ argus1; Ar38 = L @ 12/1/12 3:09 PM @ argus1; Ar37 = L @ 12/1/12 3:09…		PPLLPLAAAAAA	1	Unknown CO2	1.4013e-45	Pychron CO2	3	3	0	3	0	33	31	169			0	24.3043
	06	3	4.00581	0.0025919	0.00617321	0.480141	196.846	99.9596	68.2529	0.180823								61412-06	CM-Ash2	35	2012-12-01	13.7833	3437214000		Sanidine	3	Iain Mason		129.138.12.160	7.875	H1 Baseline = A @ 12/1/12 1:59 PM @ argus1; AX Baseline = A @ 12/1/12 1:59 PM @ argus1; L1 Baseline = A @ 12/1/12 1:59 PM @ argus1; L2 Baseline = A @ 12/1/12 1:59 PM @ argus1; CDD Baseline = A @ 12/1/12 1:59 PM @ argus1; H2 Baseline = A @ 12/1/12 1:59 PM @ argus1; Ar40 = P @ 12/1/12 1:59 PM @ argus1; Ar39 = P @ 12/1/12 1:59 PM @ argus1; Ar38 = L @ 12/1/12 1:59 PM @ argus1; Ar37 = L @ 12/1/12 1:59…		PPLLPLAAAAAA	1	Unknown CO2	1.079e-43	Pychron CO2	3	3	0	3	0	33	31	161			0	38.4671
	12	3	4.24349	0.0073415	0.4529	0.363051	69.4959	96.8267	70.0108	0.251133								61412-12	CM-Ash2	35	2012-12-01	15.1667	3437219000		Sanidine	3	Iain Mason		129.138.12.160	7.875	H1 Baseline = A @ 12/1/12 3:23 PM @ argus1; AX Baseline = A @ 12/1/12 3:23 PM @ argus1; L1 Baseline = A @ 12/1/12 3:23 PM @ argus1; L2 Baseline = A @ 12/1/12 3:23 PM @ argus1; CDD Baseline = A @ 12/1/12 3:23 PM @ argus1; H2 Baseline = A @ 12/1/12 3:23 PM @ argus1; Ar40 = P @ 12/1/12 3:23 PM @ argus1; Ar39 = P @ 12/1/12 3:23 PM @ argus1; Ar38 = L @ 12/1/12 3:23 PM @ argus1; Ar37 = L @ 12/1/12 3:23…		PPLLPLAAAAAA	1	Unknown CO2	1.4013e-45	Pychron CO2	3	3	0	3	0	33	31	170			0	30.8122
	16	3	4.19174	-0.0099808	0.1413	0.12415	-	98.969	70.6719	0.753621								61412-16	CM-Ash2	35	2012-12-01	16.2167	3437223000		Sanidine	3	Iain Mason		129.138.12.160	7.875	H1 Baseline = A @ 12/1/12 4:24 PM @ argus1; AX Baseline = A @ 12/1/12 4:24 PM @ argus1; L1 Baseline = A @ 12/1/12 4:24 PM @ argus1; L2 Baseline = A @ 12/1/12 4:24 PM @ argus1; CDD Baseline = A @ 12/1/12 4:24 PM @ argus1; H2 Baseline = A @ 12/1/12 4:24 PM @ argus1; Ar40 = P @ 12/1/12 4:24 PM @ argus1; Ar39 = P @ 12/1/12 4:24 PM @ argus1; Ar38 = L @ 12/1/12 4:24 PM @ argus1; Ar37 = L @ 12/1/12 4:24…		PPLLPLAAAAAA	1	Unknown CO2	0	Pychron CO2	3	3	0	3	0	33	31	174			0	10.408
	02	3	4.50441	0.0078345	0.7379	0.273755	65.1227	95.1227	72.9568	1.28173								61412-02	CM-Ash2	35	2012-11-30	12.5667	3437124000		Sanidine	3	Iain Mason		129.138.12.160	7.875	H1 Baseline = A @ 11/30/12 12:42 PM @ argus1; AX Baseline = A @ 11/30/12 12:42 PM @ argus1; L1 Baseline = A @ 11/30/12 12:42 PM @ argus1; L2 Baseline = A @ 11/30/12 12:42 PM @ argus1; CDD Baseline = A @ 11/30/12 12:42 PM @ argus1; H2 Baseline = A @ 11/30/12 12:42 PM @ argus1; Ar40 = P @ 11/30/12 12:42 PM @ argus1; Ar39 = P @ 11/30/12 12:42 PM @ argus1; Ar38 = L @ 11/30/12 12:42 PM @ argus1; Ar37 …		PPLLPLAAAAAA	1	Unknown CO2	0.0041756	Pychron CO2	3	3	0	3	0	33	31	167			0	24.6622
	03	3	4.40886	0.003917	0.3032	0.311286	130.254	97.9581	73.5232	1.19238								61412-03	CM-Ash2	35	2012-11-30	12.9167	3437125000		Sanidine	3	Iain Mason		129.138.12.160	7.875	H1 Baseline = A @ 11/30/12 1:03 PM @ argus1; AX Baseline = A @ 11/30/12 1:03 PM @ argus1; L1 Baseline = A @ 11/30/12 1:03 PM @ argus1; L2 Baseline = A @ 11/30/12 1:03 PM @ argus1; CDD Baseline = A @ 11/30/12 1:03 PM @ argus1; H2 Baseline = A @ 11/30/12 1:03 PM @ argus1; Ar40 = P @ 11/30/12 1:03 PM @ argus1; Ar39 = P @ 11/30/12 1:03 PM @ argus1; Ar38 = L @ 11/30/12 1:03 PM @ argus1; Ar37 = L @ 11/…		PPLLPLAAAAAA	1	Unknown CO2	0.0011035	Pychron CO2	3	3	0	3	0	33	31	168			0	27.4484
	10	3	4.38808	0.0161657	-0.0192	0.918738	31.5609	100.162	74.7966	0.577759								61412-10	CM-Ash2	35	2012-12-01	14.8167	3437218000		Sanidine	3	Iain Mason		129.138.12.160	7.875	H1 Baseline = A @ 12/1/12 2:56 PM @ argus1; AX Baseline = A @ 12/1/12 2:56 PM @ argus1; L1 Baseline = A @ 12/1/12 2:56 PM @ argus1; L2 Baseline = A @ 12/1/12 2:56 PM @ argus1; CDD Baseline = A @ 12/1/12 2:56 PM @ argus1; H2 Baseline = A @ 12/1/12 2:56 PM @ argus1; Ar40 = P @ 12/1/12 2:56 PM @ argus1; Ar39 = P @ 12/1/12 2:56 PM @ argus1; Ar38 = L @ 12/1/12 2:56 PM @ argus1; Ar37 = L @ 12/1/12 2:56…		PPLLPLAAAAAA	1	Unknown CO2	2.8026e-45	Pychron CO2	3	3	0	3	0	33	31	165			0	80.6308
	05	3	4.41775	0.0091826	-0.094	1.55924	55.562	100.652	75.6534	0.389519								61412-05	CM-Ash2	35	2012-12-01	13.65	3437214000		Sanidine	3	Iain Mason		129.138.12.160	7.875	H1 Baseline = A @ 12/1/12 1:46 PM @ argus1; AX Baseline = A @ 12/1/12 1:46 PM @ argus1; L1 Baseline = A @ 12/1/12 1:46 PM @ argus1; L2 Baseline = A @ 12/1/12 1:46 PM @ argus1; CDD Baseline = A @ 12/1/12 1:46 PM @ argus1; H2 Baseline = A @ 12/1/12 1:46 PM @ argus1; Ar40 = P @ 12/1/12 1:46 PM @ argus1; Ar39 = P @ 12/1/12 1:46 PM @ argus1; Ar38 = L @ 12/1/12 1:46 PM @ argus1; Ar37 = L @ 12/1/12 1:46…		PPLLPLAAAAAA	1	Unknown CO2	1.93379e-43	Pychron CO2	3	3	0	3	0	33	31	160			0	137.768
	17	3	4.60255	0.0026447	-0.7832	0.220864	192.916	105.087	82.1498	2.35175								61412-17	CM-Ash2	35	2012-12-01	16.4167	3437224000		Sanidine	3	Iain Mason		129.138.12.160	7.875	H1 Baseline = A @ 12/1/12 4:32 PM @ argus1; AX Baseline = A @ 12/1/12 4:32 PM @ argus1; L1 Baseline = A @ 12/1/12 4:32 PM @ argus1; L2 Baseline = A @ 12/1/12 4:32 PM @ argus1; CDD Baseline = A @ 12/1/12 4:32 PM @ argus1; H2 Baseline = A @ 12/1/12 4:32 PM @ argus1; Ar40 = P @ 12/1/12 4:32 PM @ argus1; Ar39 = P @ 12/1/12 4:32 PM @ argus1; Ar38 = L @ 12/1/12 4:32 PM @ argus1; Ar37 = L @ 12/1/12 4:32…		PPLLPLAAAAAA	1	Unknown CO2	0	Pychron CO2	3	3	0	3	0	33	31	175			0	20.3308
	14	3	6.27383	0.0020522	-0.2447	0.449867	248.613	101.169	107.116	1.24268								61412-14	CM-Ash2	35	2012-12-01	15.95	3437222000		Sanidine	3	Iain Mason		129.138.12.160	7.875	H1 Baseline = A @ 12/1/12 4:04 PM @ argus1; AX Baseline = A @ 12/1/12 4:04 PM @ argus1; L1 Baseline = A @ 12/1/12 4:04 PM @ argus1; L2 Baseline = A @ 12/1/12 4:04 PM @ argus1; CDD Baseline = A @ 12/1/12 4:04 PM @ argus1; H2 Baseline = A @ 12/1/12 4:04 PM @ argus1; Ar40 = P @ 12/1/12 4:04 PM @ argus1; Ar39 = P @ 12/1/12 4:04 PM @ argus1; Ar38 = L @ 12/1/12 4:04 PM @ argus1; Ar37 = L @ 12/1/12 4:04…		PPLLPLAAAAAA	1	Unknown CO2	0	Pychron CO2	3	3	0	3	0	33	31	172			0	56.4478
	15	3	9.03253	0.0249679	-0.0874	0.449754	20.4344	100.311	151.123	1.8459								61412-15	CM-Ash2	35	2012-12-01	16.0833	3437223000		Sanidine	3	Iain Mason		129.138.12.160	7.875	H1 Baseline = A @ 12/1/12 4:12 PM @ argus1; AX Baseline = A @ 12/1/12 4:12 PM @ argus1; L1 Baseline = A @ 12/1/12 4:12 PM @ argus1; L2 Baseline = A @ 12/1/12 4:12 PM @ argus1; CDD Baseline = A @ 12/1/12 4:12 PM @ argus1; H2 Baseline = A @ 12/1/12 4:12 PM @ argus1; Ar40 = P @ 12/1/12 4:12 PM @ argus1; Ar39 = P @ 12/1/12 4:12 PM @ argus1; Ar38 = L @ 12/1/12 4:12 PM @ argus1; Ar37 = L @ 12/1/12 4:12…		PPLLPLAAAAAA	1	Unknown CO2	0	Pychron CO2	3	3	0	3	0	33	31	173			0	81.2498
	24	3	12.0352	-0.0040161	1.1029	0.411322	-	97.2651	193.029	2.18988								61412-24	CM-Ash2	35	2012-12-01	17.9667	3437230000		Sanidine	3	Iain Mason		129.138.12.160	7.875	H1 Baseline = A @ 12/1/12 6:05 PM @ argus1; AX Baseline = A @ 12/1/12 6:05 PM @ argus1; L1 Baseline = A @ 12/1/12 6:05 PM @ argus1; L2 Baseline = A @ 12/1/12 6:05 PM @ argus1; CDD Baseline = A @ 12/1/12 6:05 PM @ argus1; H2 Baseline = A @ 12/1/12 6:05 PM @ argus1; Ar40 = P @ 12/1/12 6:05 PM @ argus1; Ar39 = P @ 12/1/12 6:05 PM @ argus1; Ar38 = L @ 12/1/12 6:05 PM @ argus1; Ar37 = L @ 12/1/12 6:05…		PPLLPLAAAAAA	1	Unknown CO2	0	Pychron CO2	3	3	0	3	0	33	31	182			0	99.0068
	01	3	13.9817	0.376534	4.2263	0.0801899	1.355	91.2108	209.409	21.8039								61412-01	CM-Ash2	35	2012-11-30	12.2	3437122000		Sanidine	3	Iain Mason		129.138.12.160	7.875	H1 Baseline = A @ 11/30/12 12:19 PM @ argus1; AX Baseline = A @ 11/30/12 12:19 PM @ argus1; L1 Baseline = A @ 11/30/12 12:19 PM @ argus1; L2 Baseline = A @ 11/30/12 12:19 PM @ argus1; CDD Baseline = A @ 11/30/12 12:19 PM @ argus1; H2 Baseline = A @ 11/30/12 12:19 PM @ argus1; Ar40 = P @ 11/30/12 12:19 PM @ argus1; Ar39 = P @ 11/30/12 12:19 PM @ argus1; Ar38 = L @ 11/30/12 12:19 PM @ argus1; Ar37 …		PPLLPLAAAAAA	1	Unknown CO2	0.0133903	Pychron CO2	3	3	0	3	0	33	31	166			0	22.4298
	08	3	34.5984	-0.0032826	0.1228	1.32777	-	99.8937	519.943	1.90912								61412-08	CM-Ash2	35	2012-12-01	14.55	3437217000		Sanidine	3	Iain Mason		129.138.12.160	7.875	H1 Baseline = A @ 12/1/12 2:40 PM @ argus1; AX Baseline = A @ 12/1/12 2:40 PM @ argus1; L1 Baseline = A @ 12/1/12 2:40 PM @ argus1; L2 Baseline = A @ 12/1/12 2:40 PM @ argus1; CDD Baseline = A @ 12/1/12 2:40 PM @ argus1; H2 Baseline = A @ 12/1/12 2:40 PM @ argus1; Ar40 = P @ 12/1/12 2:40 PM @ argus1; Ar39 = P @ 12/1/12 2:40 PM @ argus1; Ar38 = L @ 12/1/12 2:40 PM @ argus1; Ar37 = L @ 12/1/12 2:40…		PPLLPLAAAAAA	1	Unknown CO2	8.40779e-45	Pychron CO2	3	3	0	3	0	33	31	163			0	918.771
	18	3	51.916	0.0068243	0.9321	0.244087	74.7628	99.4654	730.992	13.6372								61412-18	CM-Ash2	35	2012-12-01	16.55	3437224000		Sanidine	3	Iain Mason		129.138.12.160	7.875	H1 Baseline = A @ 12/1/12 4:40 PM @ argus1; AX Baseline = A @ 12/1/12 4:40 PM @ argus1; L1 Baseline = A @ 12/1/12 4:40 PM @ argus1; L2 Baseline = A @ 12/1/12 4:40 PM @ argus1; CDD Baseline = A @ 12/1/12 4:40 PM @ argus1; H2 Baseline = A @ 12/1/12 4:40 PM @ argus1; Ar40 = P @ 12/1/12 4:40 PM @ argus1; Ar39 = P @ 12/1/12 4:40 PM @ argus1; Ar38 = L @ 12/1/12 4:40 PM @ argus1; Ar37 = L @ 12/1/12 4:40…		PPLLPLAAAAAA	1	Unknown CO2	0	Pychron CO2	3	3	0	3	0	33	31	176			0	253.442
	25	3	66.1503	0.0209501	0.00409161	0.207895	24.3533	100	893.007	10.2859								61412-25	CM-Ash2	35	2012-12-01	18.1	3437230000		Sanidine	3	Iain Mason		129.138.12.160	7.875	H1 Baseline = A @ 12/1/12 6:13 PM @ argus1; AX Baseline = A @ 12/1/12 6:13 PM @ argus1; L1 Baseline = A @ 12/1/12 6:13 PM @ argus1; L2 Baseline = A @ 12/1/12 6:13 PM @ argus1; CDD Baseline = A @ 12/1/12 6:13 PM @ argus1; H2 Baseline = A @ 12/1/12 6:13 PM @ argus1; Ar40 = P @ 12/1/12 6:13 PM @ argus1; Ar39 = P @ 12/1/12 6:13 PM @ argus1; Ar38 = L @ 12/1/12 6:13 PM @ argus1; Ar37 = L @ 12/1/12 6:13…		PPLLPLAAAAAA	1	Unknown CO2	0	Pychron CO2	3	3	0	3	0	33	31	183			0	275.05
	19	3	82.0254	0.0040143	0.2803	0.387526	127.097	99.8986	1054.39	8.09832								61412-19	CM-Ash2	35	2012-12-01	16.9	3437226000		Sanidine	3	Iain Mason		129.138.12.160	7.875	H1 Baseline = A @ 12/1/12 5:01 PM @ argus1; AX Baseline = A @ 12/1/12 5:01 PM @ argus1; L1 Baseline = A @ 12/1/12 5:01 PM @ argus1; L2 Baseline = A @ 12/1/12 5:01 PM @ argus1; CDD Baseline = A @ 12/1/12 5:01 PM @ argus1; H2 Baseline = A @ 12/1/12 5:01 PM @ argus1; Ar40 = P @ 12/1/12 5:01 PM @ argus1; Ar39 = P @ 12/1/12 5:01 PM @ argus1; Ar38 = L @ 12/1/12 5:01 PM @ argus1; Ar37 = L @ 12/1/12 5:01…		PPLLPLAAAAAA	1	Unknown CO2	0	Pychron CO2	3	3	0	3	0	33	31	177			0	635.741
	20	3	84.897	-0.0315512	-0.6235	0.257076	-	100.216	1084.82	15.019								61412-20	CM-Ash2	35	2012-12-01	17.0333	3437226000		Sanidine	3	Iain Mason		129.138.12.160	7.875	H1 Baseline = A @ 12/1/12 5:08 PM @ argus1; AX Baseline = A @ 12/1/12 5:08 PM @ argus1; L1 Baseline = A @ 12/1/12 5:08 PM @ argus1; L2 Baseline = A @ 12/1/12 5:08 PM @ argus1; CDD Baseline = A @ 12/1/12 5:08 PM @ argus1; H2 Baseline = A @ 12/1/12 5:08 PM @ argus1; Ar40 = P @ 12/1/12 5:08 PM @ argus1; Ar39 = P @ 12/1/12 5:08 PM @ argus1; Ar38 = L @ 12/1/12 5:08 PM @ argus1; Ar37 = L @ 12/1/12 5:08…		PPLLPLAAAAAA	1	Unknown CO2	0	Pychron CO2	3	3	0	3	0	33	31	178			0	436.491
	22	3	119	0.0020008	0.00290483	8.84144	255	99.9994	1385.14	2.47673								61412-22	CM-Ash2	35	2012-12-01	17.5	3437228000		Sanidine	3	Iain Mason		129.138.12.160	7.875	H1 Baseline = A @ 12/1/12 5:36 PM @ argus1; AX Baseline = A @ 12/1/12 5:36 PM @ argus1; L1 Baseline = A @ 12/1/12 5:36 PM @ argus1; L2 Baseline = A @ 12/1/12 5:36 PM @ argus1; CDD Baseline = A @ 12/1/12 5:36 PM @ argus1; H2 Baseline = A @ 12/1/12 5:36 PM @ argus1; Ar40 = P @ 12/1/12 5:36 PM @ argus1; Ar39 = P @ 12/1/12 5:36 PM @ argus1; Ar38 = L @ 12/1/12 5:36 PM @ argus1; Ar37 = L @ 12/1/12 5:36…		PPLLPLAAAAAA	1	Unknown CO2	0	Pychron CO2	3	3	0	3	0	33	31	180			0	21042.7
	CM-Ash2, Sanidine, J=0.0091559±0.00%, IC=1.05521±0.0010653, NM-258C, Lab#=61736, Argus VI
X	83	4	3.98467	0.0112063	-0.0246	0.614217	45.5283	100.208	65.6056	0.134267								61736-83	CM-Ash2	37	2013-08-16	8.36667	3459486000		Sanidine	29	Iain Mason		129.138.12.160	7.875	H2 Baseline = A @ 8/19/13 1:33 PM @ argonlab; H1 Baseline = A @ 8/19/13 1:33 PM @ argonlab; AX Baseline = A @ 8/19/13 1:33 PM @ argonlab; L1 Baseline = A @ 8/19/13 1:33 PM @ argonlab; L2 Baseline = A @ 8/19/13 1:33 PM @ argonlab; CDD Baseline = A @ 8/19/13 1:33 PM @ argonlab; Ar41 = A @ 8/19/13 1:33 PM @ argonlab; Ar40 = P @ 8/19/13 1:33 PM @ argonlab; Ar39 = P @ 8/19/13 1:33 PM @ argonlab; Ar38 …	Hole 29	APPLLPAAAAAA	1	Pychron Script	1	Fusions CO2	4	4	0	4	0	30	30	113			0	48.9494
X	13	4	4.00096	0.0091285	0.0131	0.859487	55.8913	99.9191	65.6828	0.190983								61736-13	CM-Ash2	37	2013-08-15	16.35	3459428000		Sanidine	29	Iain Mason		129.138.12.160	7.875	H2 Baseline = A @ 8/19/13 1:32 PM @ argonlab; H1 Baseline = A @ 8/19/13 1:32 PM @ argonlab; AX Baseline = A @ 8/19/13 1:32 PM @ argonlab; L1 Baseline = A @ 8/19/13 1:32 PM @ argonlab; L2 Baseline = A @ 8/19/13 1:32 PM @ argonlab; CDD Baseline = A @ 8/19/13 1:32 PM @ argonlab; Ar41 = A @ 8/19/13 1:32 PM @ argonlab; Ar40 = P @ 8/19/13 1:32 PM @ argonlab; Ar39 = P @ 8/19/13 1:32 PM @ argonlab; Ar38 …	Hole 29	APPLLPAAAAAA	1	Pychron Script	1	Fusions CO2	4	4	0	4	0	30	30	43			0	68.7757
X	51	4	4.01813	0.0082808	0.00510238	0.827393	61.6129	99.9772	65.9978	0.194447								61736-51	CM-Ash2	37	2013-08-16	0.516667	3459458000		Sanidine	29	Iain Mason		129.138.12.160	7.875	H2 Baseline = A @ 8/19/13 1:32 PM @ argonlab; H1 Baseline = A @ 8/19/13 1:32 PM @ argonlab; AX Baseline = A @ 8/19/13 1:32 PM @ argonlab; L1 Baseline = A @ 8/19/13 1:32 PM @ argonlab; L2 Baseline = A @ 8/19/13 1:32 PM @ argonlab; CDD Baseline = A @ 8/19/13 1:32 PM @ argonlab; Ar41 = A @ 8/19/13 1:32 PM @ argonlab; Ar40 = P @ 8/19/13 1:32 PM @ argonlab; Ar39 = P @ 8/19/13 1:32 PM @ argonlab; Ar38 …	Hole 29	APPLLPAAAAAA	1	Pychron Script	1	Fusions CO2	4	4	0	4	0	30	30	81			0	66.4917
	37	4	4.12102	-0.0093006	0.0187	0.339406	-	99.8425	67.5699	0.459102								61736-37	CM-Ash2	37	2013-08-15	21.7167	3459448000		Sanidine	29	Iain Mason		129.138.12.160	7.875	H2 Baseline = A @ 8/19/13 1:32 PM @ argonlab; H1 Baseline = A @ 8/19/13 1:32 PM @ argonlab; AX Baseline = A @ 8/19/13 1:32 PM @ argonlab; L1 Baseline = A @ 8/19/13 1:32 PM @ argonlab; L2 Baseline = A @ 8/19/13 1:32 PM @ argonlab; CDD Baseline = A @ 8/19/13 1:32 PM @ argonlab; Ar41 = A @ 8/19/13 1:32 PM @ argonlab; Ar40 = P @ 8/19/13 1:32 PM @ argonlab; Ar39 = P @ 8/19/13 1:32 PM @ argonlab; Ar38 …	Hole 29	APPLLPAAAAAA	1	Pychron Script	1	Fusions CO2	4	4	0	4	0	30	30	67			0	27.9739
	124	4	4.15383	0.0248019	0.04	0.44724	20.5712	99.7563	68.0427	0.175007								61736-124	CM-Ash2	37	2013-08-16	17.4667	3459519000		Sanidine	29	Iain Mason		129.138.12.160	7.875	H2 Baseline = A @ 8/19/13 1:32 PM @ argonlab; H1 Baseline = A @ 8/19/13 1:32 PM @ argonlab; AX Baseline = A @ 8/19/13 1:32 PM @ argonlab; L1 Baseline = A @ 8/19/13 1:32 PM @ argonlab; L2 Baseline = A @ 8/19/13 1:32 PM @ argonlab; CDD Baseline = A @ 8/19/13 1:32 PM @ argonlab; Ar41 = A @ 8/19/13 1:32 PM @ argonlab; Ar40 = P @ 8/19/13 1:32 PM @ argonlab; Ar39 = P @ 8/19/13 1:32 PM @ argonlab; Ar38 …	Hole 29	APPLLPAAAAAA	1	Pychron Script	1	Fusions CO2	4	4	0	4	0	30	30	154			0	37.1558
	27	4	4.15109	0.0040887	0.00543206	1.38027	124.784	99.9689	68.1399	0.116473								61736-27	CM-Ash2	37	2013-08-15	19.3	3459439000		Sanidine	29	Iain Mason		129.138.12.160	7.875	H2 Baseline = A @ 8/19/13 1:32 PM @ argonlab; H1 Baseline = A @ 8/19/13 1:32 PM @ argonlab; AX Baseline = A @ 8/19/13 1:32 PM @ argonlab; L1 Baseline = A @ 8/19/13 1:32 PM @ argonlab; L2 Baseline = A @ 8/19/13 1:32 PM @ argonlab; CDD Baseline = A @ 8/19/13 1:32 PM @ argonlab; Ar41 = A @ 8/19/13 1:32 PM @ argonlab; Ar40 = P @ 8/19/13 1:32 PM @ argonlab; Ar39 = P @ 8/19/13 1:32 PM @ argonlab; Ar38 …	Hole 29	APPLLPAAAAAA	1	Pychron Script	1	Fusions CO2	4	4	0	4	0	30	30	57			0	114.593
	91	4	4.14996	0.003684	-0.00736349	0.622496	138.492	100.059	68.1816	0.139558								61736-91	CM-Ash2	37	2013-08-16	10.0333	3459492000		Sanidine	29	Iain Mason		129.138.12.160	7.875	H2 Baseline = A @ 8/19/13 1:33 PM @ argonlab; H1 Baseline = A @ 8/19/13 1:33 PM @ argonlab; AX Baseline = A @ 8/19/13 1:33 PM @ argonlab; L1 Baseline = A @ 8/19/13 1:33 PM @ argonlab; L2 Baseline = A @ 8/19/13 1:33 PM @ argonlab; CDD Baseline = A @ 8/19/13 1:33 PM @ argonlab; Ar41 = A @ 8/19/13 1:33 PM @ argonlab; Ar40 = P @ 8/19/13 1:33 PM @ argonlab; Ar39 = P @ 8/19/13 1:33 PM @ argonlab; Ar38 …	Hole 29	APPLLPAAAAAA	1	Pychron Script	1	Fusions CO2	4	4	0	4	0	30	30	121			0	51.6668
	94	4	4.15539	0.0138444	0.00792488	0.887676	36.8527	99.9684	68.2094	0.0952994								61736-94	CM-Ash2	37	2013-08-16	10.7833	3459495000		Sanidine	29	Iain Mason		129.138.12.160	7.875	H2 Baseline = A @ 8/19/13 1:33 PM @ argonlab; H1 Baseline = A @ 8/19/13 1:33 PM @ argonlab; AX Baseline = A @ 8/19/13 1:33 PM @ argonlab; L1 Baseline = A @ 8/19/13 1:33 PM @ argonlab; L2 Baseline = A @ 8/19/13 1:33 PM @ argonlab; CDD Baseline = A @ 8/19/13 1:33 PM @ argonlab; Ar41 = A @ 8/19/13 1:33 PM @ argonlab; Ar40 = P @ 8/19/13 1:33 PM @ argonlab; Ar39 = P @ 8/19/13 1:33 PM @ argonlab; Ar38 …	Hole 29	APPLLPAAAAAA	1	Pychron Script	1	Fusions CO2	4	4	0	4	0	30	30	124			0	73.7734
	152	4	4.16042	0.0125066	0.00387411	0.75171	40.7948	99.9957	68.3089	0.109482								61736-152	CM-Ash2	37	2013-08-17	1.58333	3459548000		Sanidine	29	Iain Mason		129.138.12.160	7.875	H2 Baseline = A @ 8/19/13 1:32 PM @ argonlab; H1 Baseline = A @ 8/19/13 1:32 PM @ argonlab; AX Baseline = A @ 8/19/13 1:32 PM @ argonlab; L1 Baseline = A @ 8/19/13 1:32 PM @ argonlab; L2 Baseline = A @ 8/19/13 1:32 PM @ argonlab; CDD Baseline = A @ 8/19/13 1:32 PM @ argonlab; Ar41 = A @ 8/19/13 1:32 PM @ argonlab; Ar40 = P @ 8/19/13 1:32 PM @ argonlab; Ar39 = P @ 8/19/13 1:32 PM @ argonlab; Ar38 …	Hole 29	APPLLPAAAAAA	1	Pychron Script	1	Fusions CO2	4	4	0	4	0	30	30	182			0	62.5492
	138	4	4.22087	0.0020296	0.2037	0.642597	251.382	98.5636	68.3101	0.130105								61736-138	CM-Ash2	37	2013-08-16	21.3167	3459533000		Sanidine	29	Iain Mason		129.138.12.160	7.875	H2 Baseline = A @ 8/19/13 1:32 PM @ argonlab; H1 Baseline = A @ 8/19/13 1:32 PM @ argonlab; AX Baseline = A @ 8/19/13 1:32 PM @ argonlab; L1 Baseline = A @ 8/19/13 1:32 PM @ argonlab; L2 Baseline = A @ 8/19/13 1:32 PM @ argonlab; CDD Baseline = A @ 8/19/13 1:32 PM @ argonlab; Ar41 = A @ 8/19/13 1:32 PM @ argonlab; Ar40 = P @ 8/19/13 1:32 PM @ argonlab; Ar39 = P @ 8/19/13 1:32 PM @ argonlab; Ar38 …	Hole 29	APPLLPAAAAAA	1	Pychron Script	1	Fusions CO2	4	4	0	4	0	30	30	168			0	54.2465
	140	4	4.16104	0.011276	0.00185662	0.627143	45.2469	100.007	68.3263	0.129619								61736-140	CM-Ash2	37	2013-08-16	22.1833	3459536000		Sanidine	29	Iain Mason		129.138.12.160	7.875	H2 Baseline = A @ 8/19/13 1:32 PM @ argonlab; H1 Baseline = A @ 8/19/13 1:32 PM @ argonlab; AX Baseline = A @ 8/19/13 1:32 PM @ argonlab; L1 Baseline = A @ 8/19/13 1:32 PM @ argonlab; L2 Baseline = A @ 8/19/13 1:32 PM @ argonlab; CDD Baseline = A @ 8/19/13 1:32 PM @ argonlab; Ar41 = A @ 8/19/13 1:32 PM @ argonlab; Ar40 = P @ 8/19/13 1:32 PM @ argonlab; Ar39 = P @ 8/19/13 1:32 PM @ argonlab; Ar38 …	Hole 29	APPLLPAAAAAA	1	Pychron Script	1	Fusions CO2	4	4	0	4	0	30	30	170			0	52.1918
	05	4	4.1639	0.0020872	0.00780919	1.11771	244.444	99.9468	68.3317	0.154533								61736-05	CM-Ash2	37	2013-08-15	14.8167	3459423000		Sanidine	29	Iain Mason		129.138.12.160	7.875	H2 Baseline = A @ 8/19/13 1:32 PM @ argonlab; H1 Baseline = A @ 8/19/13 1:32 PM @ argonlab; AX Baseline = A @ 8/19/13 1:32 PM @ argonlab; L1 Baseline = A @ 8/19/13 1:32 PM @ argonlab; L2 Baseline = A @ 8/19/13 1:32 PM @ argonlab; CDD Baseline = A @ 8/19/13 1:32 PM @ argonlab; Ar41 = A @ 8/19/13 1:32 PM @ argonlab; Ar40 = P @ 8/19/13 1:32 PM @ argonlab; Ar39 = P @ 8/19/13 1:32 PM @ argonlab; Ar38 …	Hole 29	APPLLPAAAAAA	1	Pychron Script	1	Fusions CO2	4	4	0	4	0	30	30	35			0	93.0807
	77	4	4.1661	0.01069	0.00481849	0.817846	47.7272	99.985	68.3933	0.0998227								61736-77	CM-Ash2	37	2013-08-16	7.13333	3459482000		Sanidine	29	Iain Mason		129.138.12.160	7.875	H2 Baseline = A @ 8/19/13 1:33 PM @ argonlab; H1 Baseline = A @ 8/19/13 1:33 PM @ argonlab; AX Baseline = A @ 8/19/13 1:33 PM @ argonlab; L1 Baseline = A @ 8/19/13 1:33 PM @ argonlab; L2 Baseline = A @ 8/19/13 1:33 PM @ argonlab; CDD Baseline = A @ 8/19/13 1:33 PM @ argonlab; Ar41 = A @ 8/19/13 1:33 PM @ argonlab; Ar40 = P @ 8/19/13 1:33 PM @ argonlab; Ar39 = P @ 8/19/13 1:33 PM @ argonlab; Ar38 …	Hole 29	APPLLPAAAAAA	1	Pychron Script	1	Fusions CO2	4	4	0	4	0	30	30	107			0	68.1451
	149	4	4.18262	0.0078767	0.0381	0.944981	64.7738	99.7427	68.4965	0.0919871								61736-149	CM-Ash2	37	2013-08-17	0.85	3459545000		Sanidine	29	Iain Mason		129.138.12.160	7.875	H2 Baseline = A @ 8/19/13 1:32 PM @ argonlab; H1 Baseline = A @ 8/19/13 1:32 PM @ argonlab; AX Baseline = A @ 8/19/13 1:32 PM @ argonlab; L1 Baseline = A @ 8/19/13 1:32 PM @ argonlab; L2 Baseline = A @ 8/19/13 1:32 PM @ argonlab; CDD Baseline = A @ 8/19/13 1:32 PM @ argonlab; Ar41 = A @ 8/19/13 1:32 PM @ argonlab; Ar40 = P @ 8/19/13 1:32 PM @ argonlab; Ar39 = P @ 8/19/13 1:32 PM @ argonlab; Ar38 …	Hole 29	APPLLPAAAAAA	1	Pychron Script	1	Fusions CO2	4	4	0	4	0	30	30	179			0	79.0504
	141	4	4.17753	0.0017445	0.00101502	0.911356	292.464	99.9942	68.5836	0.0921417								61736-141	CM-Ash2	37	2013-08-16	22.5	3459537000		Sanidine	29	Iain Mason		129.138.12.160	7.875	H2 Baseline = A @ 8/19/13 1:32 PM @ argonlab; H1 Baseline = A @ 8/19/13 1:32 PM @ argonlab; AX Baseline = A @ 8/19/13 1:32 PM @ argonlab; L1 Baseline = A @ 8/19/13 1:32 PM @ argonlab; L2 Baseline = A @ 8/19/13 1:32 PM @ argonlab; CDD Baseline = A @ 8/19/13 1:32 PM @ argonlab; Ar41 = A @ 8/19/13 1:32 PM @ argonlab; Ar40 = P @ 8/19/13 1:32 PM @ argonlab; Ar39 = P @ 8/19/13 1:32 PM @ argonlab; Ar38 …	Hole 29	APPLLPAAAAAA	1	Pychron Script	1	Fusions CO2	4	4	0	4	0	30	30	171			0	76.1445
	74	4	4.18339	0.0061336	0.0105	0.605123	83.1818	99.9362	68.6393	0.137044								61736-74	CM-Ash2	37	2013-08-16	6.31667	3459479000		Sanidine	29	Iain Mason		129.138.12.160	7.875	H2 Baseline = A @ 8/19/13 1:33 PM @ argonlab; H1 Baseline = A @ 8/19/13 1:33 PM @ argonlab; AX Baseline = A @ 8/19/13 1:33 PM @ argonlab; L1 Baseline = A @ 8/19/13 1:33 PM @ argonlab; L2 Baseline = A @ 8/19/13 1:33 PM @ argonlab; CDD Baseline = A @ 8/19/13 1:33 PM @ argonlab; Ar41 = A @ 8/19/13 1:33 PM @ argonlab; Ar40 = P @ 8/19/13 1:33 PM @ argonlab; Ar39 = P @ 8/19/13 1:33 PM @ argonlab; Ar38 …	Hole 29	APPLLPAAAAAA	1	Pychron Script	1	Fusions CO2	4	4	0	4	0	30	30	104			0	50.6295
	128	4	4.1942	0.0061352	0.0174	0.787541	83.1601	99.8881	68.7812	0.109833								61736-128	CM-Ash2	37	2013-08-16	18.6333	3459523000		Sanidine	29	Iain Mason		129.138.12.160	7.875	H2 Baseline = A @ 8/19/13 1:32 PM @ argonlab; H1 Baseline = A @ 8/19/13 1:32 PM @ argonlab; AX Baseline = A @ 8/19/13 1:32 PM @ argonlab; L1 Baseline = A @ 8/19/13 1:32 PM @ argonlab; L2 Baseline = A @ 8/19/13 1:32 PM @ argonlab; CDD Baseline = A @ 8/19/13 1:32 PM @ argonlab; Ar41 = A @ 8/19/13 1:32 PM @ argonlab; Ar40 = P @ 8/19/13 1:32 PM @ argonlab; Ar39 = P @ 8/19/13 1:32 PM @ argonlab; Ar38 …	Hole 29	APPLLPAAAAAA	1	Pychron Script	1	Fusions CO2	4	4	0	4	0	30	30	158			0	66.0624
	150	4	4.20252	0.010812	0.0261	0.986637	47.1887	99.8333	68.8784	0.0892553								61736-150	CM-Ash2	37	2013-08-17	1.16667	3459547000		Sanidine	29	Iain Mason		129.138.12.160	7.875	H2 Baseline = A @ 8/19/13 1:32 PM @ argonlab; H1 Baseline = A @ 8/19/13 1:32 PM @ argonlab; AX Baseline = A @ 8/19/13 1:32 PM @ argonlab; L1 Baseline = A @ 8/19/13 1:32 PM @ argonlab; L2 Baseline = A @ 8/19/13 1:32 PM @ argonlab; CDD Baseline = A @ 8/19/13 1:32 PM @ argonlab; Ar41 = A @ 8/19/13 1:32 PM @ argonlab; Ar40 = P @ 8/19/13 1:32 PM @ argonlab; Ar39 = P @ 8/19/13 1:32 PM @ argonlab; Ar38 …	Hole 29	APPLLPAAAAAA	1	Pychron Script	1	Fusions CO2	4	4	0	4	0	30	30	180			0	82.9278
	76	4	4.19318	0.007453	-0.0114	0.663851	68.4562	100.092	68.9024	0.12808								61736-76	CM-Ash2	37	2013-08-16	6.83333	3459481000		Sanidine	29	Iain Mason		129.138.12.160	7.875	H2 Baseline = A @ 8/19/13 1:33 PM @ argonlab; H1 Baseline = A @ 8/19/13 1:33 PM @ argonlab; AX Baseline = A @ 8/19/13 1:33 PM @ argonlab; L1 Baseline = A @ 8/19/13 1:33 PM @ argonlab; L2 Baseline = A @ 8/19/13 1:33 PM @ argonlab; CDD Baseline = A @ 8/19/13 1:33 PM @ argonlab; Ar41 = A @ 8/19/13 1:33 PM @ argonlab; Ar40 = P @ 8/19/13 1:33 PM @ argonlab; Ar39 = P @ 8/19/13 1:33 PM @ argonlab; Ar38 …	Hole 29	APPLLPAAAAAA	1	Pychron Script	1	Fusions CO2	4	4	0	4	0	30	30	106			0	55.6733
	109	4	4.20894	0.0121646	0.036	0.694666	41.9417	99.7656	68.9361	0.120054								61736-109	CM-Ash2	37	2013-08-16	14.2	3459507000		Sanidine	29	Iain Mason		129.138.12.160	7.875	H2 Baseline = A @ 8/19/13 1:32 PM @ argonlab; H1 Baseline = A @ 8/19/13 1:32 PM @ argonlab; AX Baseline = A @ 8/19/13 1:32 PM @ argonlab; L1 Baseline = A @ 8/19/13 1:32 PM @ argonlab; L2 Baseline = A @ 8/19/13 1:32 PM @ argonlab; CDD Baseline = A @ 8/19/13 1:32 PM @ argonlab; Ar41 = A @ 8/19/13 1:32 PM @ argonlab; Ar40 = P @ 8/19/13 1:32 PM @ argonlab; Ar39 = P @ 8/19/13 1:32 PM @ argonlab; Ar38 …	Hole 29	APPLLPAAAAAA	1	Pychron Script	1	Fusions CO2	4	4	0	4	0	30	30	139			0	58.4766
	135	4	4.21079	0.0188529	0.0257	0.528605	27.0624	99.8494	69.0229	0.159879								61736-135	CM-Ash2	37	2013-08-16	20.5667	3459530000		Sanidine	29	Iain Mason		129.138.12.160	7.875	H2 Baseline = A @ 8/19/13 1:32 PM @ argonlab; H1 Baseline = A @ 8/19/13 1:32 PM @ argonlab; AX Baseline = A @ 8/19/13 1:32 PM @ argonlab; L1 Baseline = A @ 8/19/13 1:32 PM @ argonlab; L2 Baseline = A @ 8/19/13 1:32 PM @ argonlab; CDD Baseline = A @ 8/19/13 1:32 PM @ argonlab; Ar41 = A @ 8/19/13 1:32 PM @ argonlab; Ar40 = P @ 8/19/13 1:32 PM @ argonlab; Ar39 = P @ 8/19/13 1:32 PM @ argonlab; Ar38 …	Hole 29	APPLLPAAAAAA	1	Pychron Script	1	Fusions CO2	4	4	0	4	0	30	30	165			0	44.5175
	67	4	4.23178	0.0063948	0.0706	1.00284	79.7842	99.5122	69.1307	0.170726								61736-67	CM-Ash2	37	2013-08-16	4	3459470000		Sanidine	29	Iain Mason		129.138.12.160	7.875	H2 Baseline = A @ 8/19/13 1:32 PM @ argonlab; H1 Baseline = A @ 8/19/13 1:32 PM @ argonlab; AX Baseline = A @ 8/19/13 1:32 PM @ argonlab; L1 Baseline = A @ 8/19/13 1:32 PM @ argonlab; L2 Baseline = A @ 8/19/13 1:32 PM @ argonlab; CDD Baseline = A @ 8/19/13 1:32 PM @ argonlab; Ar41 = A @ 8/19/13 1:32 PM @ argonlab; Ar40 = P @ 8/19/13 1:32 PM @ argonlab; Ar39 = P @ 8/19/13 1:32 PM @ argonlab; Ar38 …	Hole 29	APPLLPAAAAAA	1	Pychron Script	1	Fusions CO2	4	4	0	4	0	30	30	97			0	84.8758
	139	4	4.21487	-0.0078331	-0.00136338	0.560241	-	99.9915	69.184	0.145754								61736-139	CM-Ash2	37	2013-08-16	21.6333	3459534000		Sanidine	29	Iain Mason		129.138.12.160	7.875	H2 Baseline = A @ 8/19/13 1:32 PM @ argonlab; H1 Baseline = A @ 8/19/13 1:32 PM @ argonlab; AX Baseline = A @ 8/19/13 1:32 PM @ argonlab; L1 Baseline = A @ 8/19/13 1:32 PM @ argonlab; L2 Baseline = A @ 8/19/13 1:32 PM @ argonlab; CDD Baseline = A @ 8/19/13 1:32 PM @ argonlab; Ar41 = A @ 8/19/13 1:32 PM @ argonlab; Ar40 = P @ 8/19/13 1:32 PM @ argonlab; Ar39 = P @ 8/19/13 1:32 PM @ argonlab; Ar38 …	Hole 29	APPLLPAAAAAA	1	Pychron Script	1	Fusions CO2	4	4	0	4	0	30	30	169			0	47.2266
	47	4	4.23214	0.0022631	0.0591	0.574534	225.445	99.5853	69.1862	0.277595								61736-47	CM-Ash2	37	2013-08-15	23.6667	3459455000		Sanidine	29	Iain Mason		129.138.12.160	7.875	H2 Baseline = A @ 8/19/13 1:32 PM @ argonlab; H1 Baseline = A @ 8/19/13 1:32 PM @ argonlab; AX Baseline = A @ 8/19/13 1:32 PM @ argonlab; L1 Baseline = A @ 8/19/13 1:32 PM @ argonlab; L2 Baseline = A @ 8/19/13 1:32 PM @ argonlab; CDD Baseline = A @ 8/19/13 1:32 PM @ argonlab; Ar41 = A @ 8/19/13 1:32 PM @ argonlab; Ar40 = P @ 8/19/13 1:32 PM @ argonlab; Ar39 = P @ 8/19/13 1:32 PM @ argonlab; Ar38 …	Hole 29	APPLLPAAAAAA	1	Pychron Script	1	Fusions CO2	4	4	0	4	0	30	30	77			0	48.6303
	125	4	4.22288	0.0149285	0.0146	0.817871	34.1765	99.924	69.2683	0.0995148								61736-125	CM-Ash2	37	2013-08-16	17.8333	3459520000		Sanidine	29	Iain Mason		129.138.12.160	7.875	H2 Baseline = A @ 8/19/13 1:32 PM @ argonlab; H1 Baseline = A @ 8/19/13 1:32 PM @ argonlab; AX Baseline = A @ 8/19/13 1:32 PM @ argonlab; L1 Baseline = A @ 8/19/13 1:32 PM @ argonlab; L2 Baseline = A @ 8/19/13 1:32 PM @ argonlab; CDD Baseline = A @ 8/19/13 1:32 PM @ argonlab; Ar41 = A @ 8/19/13 1:32 PM @ argonlab; Ar40 = P @ 8/19/13 1:32 PM @ argonlab; Ar39 = P @ 8/19/13 1:32 PM @ argonlab; Ar38 …	Hole 29	APPLLPAAAAAA	1	Pychron Script	1	Fusions CO2	4	4	0	4	0	30	30	155			0	69.0761
	21	4	4.21798	0.013498	-0.0126	0.881173	37.7985	100.113	69.3178	0.183432								61736-21	CM-Ash2	37	2013-08-15	18.05	3459435000		Sanidine	29	Iain Mason		129.138.12.160	7.875	H2 Baseline = A @ 8/19/13 1:32 PM @ argonlab; H1 Baseline = A @ 8/19/13 1:32 PM @ argonlab; AX Baseline = A @ 8/19/13 1:32 PM @ argonlab; L1 Baseline = A @ 8/19/13 1:32 PM @ argonlab; L2 Baseline = A @ 8/19/13 1:32 PM @ argonlab; CDD Baseline = A @ 8/19/13 1:32 PM @ argonlab; Ar41 = A @ 8/19/13 1:32 PM @ argonlab; Ar40 = P @ 8/19/13 1:32 PM @ argonlab; Ar39 = P @ 8/19/13 1:32 PM @ argonlab; Ar38 …	Hole 29	APPLLPAAAAAA	1	Pychron Script	1	Fusions CO2	4	4	0	4	0	30	30	51			0	74.3362
	108	4	4.22505	0.0048041	0.00579616	0.59041	106.202	99.9676	69.3325	0.14123								61736-108	CM-Ash2	37	2013-08-16	13.8833	3459506000		Sanidine	29	Iain Mason		129.138.12.160	7.875	H2 Baseline = A @ 8/19/13 1:32 PM @ argonlab; H1 Baseline = A @ 8/19/13 1:32 PM @ argonlab; AX Baseline = A @ 8/19/13 1:32 PM @ argonlab; L1 Baseline = A @ 8/19/13 1:32 PM @ argonlab; L2 Baseline = A @ 8/19/13 1:32 PM @ argonlab; CDD Baseline = A @ 8/19/13 1:32 PM @ argonlab; Ar41 = A @ 8/19/13 1:32 PM @ argonlab; Ar40 = P @ 8/19/13 1:32 PM @ argonlab; Ar39 = P @ 8/19/13 1:32 PM @ argonlab; Ar38 …	Hole 29	APPLLPAAAAAA	1	Pychron Script	1	Fusions CO2	4	4	0	4	0	30	30	138			0	49.8904
	147	4	4.22585	0.0075868	0.00404029	0.895263	67.2489	99.9846	69.3571	0.0985339								61736-147	CM-Ash2	37	2013-08-17	0.2	3459543000		Sanidine	29	Iain Mason		129.138.12.160	7.875	H2 Baseline = A @ 8/19/13 1:32 PM @ argonlab; H1 Baseline = A @ 8/19/13 1:32 PM @ argonlab; AX Baseline = A @ 8/19/13 1:32 PM @ argonlab; L1 Baseline = A @ 8/19/13 1:32 PM @ argonlab; L2 Baseline = A @ 8/19/13 1:32 PM @ argonlab; CDD Baseline = A @ 8/19/13 1:32 PM @ argonlab; Ar41 = A @ 8/19/13 1:32 PM @ argonlab; Ar40 = P @ 8/19/13 1:32 PM @ argonlab; Ar39 = P @ 8/19/13 1:32 PM @ argonlab; Ar38 …	Hole 29	APPLLPAAAAAA	1	Pychron Script	1	Fusions CO2	4	4	0	4	0	30	30	177			0	75.6653
	69	4	4.22885	0.005412	0.0077827	1.38888	94.2727	99.9566	69.3863	0.0646068								61736-69	CM-Ash2	37	2013-08-16	4.93333	3459474000		Sanidine	29	Iain Mason		129.138.12.160	7.875	H2 Baseline = A @ 8/19/13 1:32 PM @ argonlab; H1 Baseline = A @ 8/19/13 1:32 PM @ argonlab; AX Baseline = A @ 8/19/13 1:32 PM @ argonlab; L1 Baseline = A @ 8/19/13 1:32 PM @ argonlab; L2 Baseline = A @ 8/19/13 1:32 PM @ argonlab; CDD Baseline = A @ 8/19/13 1:32 PM @ argonlab; Ar41 = A @ 8/19/13 1:32 PM @ argonlab; Ar40 = P @ 8/19/13 1:32 PM @ argonlab; Ar39 = P @ 8/19/13 1:32 PM @ argonlab; Ar38 …	Hole 29	APPLLPAAAAAA	1	Pychron Script	1	Fusions CO2	4	4	0	4	0	30	30	99			0	117.468
	99	4	4.22171	-0.0082216	-0.0229	0.50142	-	100.147	69.4003	0.158659								61736-99	CM-Ash2	37	2013-08-16	11.8333	3459499000		Sanidine	29	Iain Mason		129.138.12.160	7.875	H2 Baseline = A @ 8/19/13 1:33 PM @ argonlab; H1 Baseline = A @ 8/19/13 1:33 PM @ argonlab; AX Baseline = A @ 8/19/13 1:33 PM @ argonlab; L1 Baseline = A @ 8/19/13 1:33 PM @ argonlab; L2 Baseline = A @ 8/19/13 1:33 PM @ argonlab; CDD Baseline = A @ 8/19/13 1:33 PM @ argonlab; Ar41 = A @ 8/19/13 1:33 PM @ argonlab; Ar40 = P @ 8/19/13 1:33 PM @ argonlab; Ar39 = P @ 8/19/13 1:33 PM @ argonlab; Ar38 …	Hole 29	APPLLPAAAAAA	1	Pychron Script	1	Fusions CO2	4	4	0	4	0	30	30	129			0	42.3368
	71	4	4.23613	-0.0003559	0.026	0.823575	-	99.8163	69.4078	0.11121								61736-71	CM-Ash2	37	2013-08-16	5.36667	3459475000		Sanidine	29	Iain Mason		129.138.12.160	7.875	H2 Baseline = A @ 8/19/13 1:33 PM @ argonlab; H1 Baseline = A @ 8/19/13 1:33 PM @ argonlab; AX Baseline = A @ 8/19/13 1:33 PM @ argonlab; L1 Baseline = A @ 8/19/13 1:33 PM @ argonlab; L2 Baseline = A @ 8/19/13 1:33 PM @ argonlab; CDD Baseline = A @ 8/19/13 1:33 PM @ argonlab; Ar41 = A @ 8/19/13 1:33 PM @ argonlab; Ar40 = P @ 8/19/13 1:33 PM @ argonlab; Ar39 = P @ 8/19/13 1:33 PM @ argonlab; Ar38 …	Hole 29	APPLLPAAAAAA	1	Pychron Script	1	Fusions CO2	4	4	0	4	0	30	30	101			0	69.7755
	62	4	4.23728	0.0058872	0.0266	1.22658	86.6633	99.823	69.4311	0.136803								61736-62	CM-Ash2	37	2013-08-16	2.9	3459466000		Sanidine	29	Iain Mason		129.138.12.160	7.875	H2 Baseline = A @ 8/19/13 1:32 PM @ argonlab; H1 Baseline = A @ 8/19/13 1:32 PM @ argonlab; AX Baseline = A @ 8/19/13 1:32 PM @ argonlab; L1 Baseline = A @ 8/19/13 1:32 PM @ argonlab; L2 Baseline = A @ 8/19/13 1:32 PM @ argonlab; CDD Baseline = A @ 8/19/13 1:32 PM @ argonlab; Ar41 = A @ 8/19/13 1:32 PM @ argonlab; Ar40 = P @ 8/19/13 1:32 PM @ argonlab; Ar39 = P @ 8/19/13 1:32 PM @ argonlab; Ar38 …	Hole 29	APPLLPAAAAAA	1	Pychron Script	1	Fusions CO2	4	4	0	4	0	30	30	92			0	103.948
	145	4	4.23207	0.0068565	0.00290961	1.73822	74.4117	99.9942	69.4639	0.051602								61736-145	CM-Ash2	37	2013-08-16	23.5667	3459541000		Sanidine	29	Iain Mason		129.138.12.160	7.875	H2 Baseline = A @ 8/19/13 1:32 PM @ argonlab; H1 Baseline = A @ 8/19/13 1:32 PM @ argonlab; AX Baseline = A @ 8/19/13 1:32 PM @ argonlab; L1 Baseline = A @ 8/19/13 1:32 PM @ argonlab; L2 Baseline = A @ 8/19/13 1:32 PM @ argonlab; CDD Baseline = A @ 8/19/13 1:32 PM @ argonlab; Ar41 = A @ 8/19/13 1:32 PM @ argonlab; Ar40 = P @ 8/19/13 1:32 PM @ argonlab; Ar39 = P @ 8/19/13 1:32 PM @ argonlab; Ar38 …	Hole 29	APPLLPAAAAAA	1	Pychron Script	1	Fusions CO2	4	4	0	4	0	30	30	175			0	147.126
	133	4	4.23847	0.0020013	0.00961338	1.41456	254.936	99.9364	69.5277	0.0613333								61736-133	CM-Ash2	37	2013-08-16	19.8167	3459527000		Sanidine	29	Iain Mason		129.138.12.160	7.875	H2 Baseline = A @ 8/19/13 1:32 PM @ argonlab; H1 Baseline = A @ 8/19/13 1:32 PM @ argonlab; AX Baseline = A @ 8/19/13 1:32 PM @ argonlab; L1 Baseline = A @ 8/19/13 1:32 PM @ argonlab; L2 Baseline = A @ 8/19/13 1:32 PM @ argonlab; CDD Baseline = A @ 8/19/13 1:32 PM @ argonlab; Ar41 = A @ 8/19/13 1:32 PM @ argonlab; Ar40 = P @ 8/19/13 1:32 PM @ argonlab; Ar39 = P @ 8/19/13 1:32 PM @ argonlab; Ar38 …	Hole 29	APPLLPAAAAAA	1	Pychron Script	1	Fusions CO2	4	4	0	4	0	30	30	163			0	119.911
	72	4	4.23749	-0.0023229	-0.000176068	0.633855	-	99.9959	69.5521	0.136725								61736-72	CM-Ash2	37	2013-08-16	5.68333	3459476000		Sanidine	29	Iain Mason		129.138.12.160	7.875	H2 Baseline = A @ 8/19/13 1:33 PM @ argonlab; H1 Baseline = A @ 8/19/13 1:33 PM @ argonlab; AX Baseline = A @ 8/19/13 1:33 PM @ argonlab; L1 Baseline = A @ 8/19/13 1:33 PM @ argonlab; L2 Baseline = A @ 8/19/13 1:33 PM @ argonlab; CDD Baseline = A @ 8/19/13 1:33 PM @ argonlab; Ar41 = A @ 8/19/13 1:33 PM @ argonlab; Ar40 = P @ 8/19/13 1:33 PM @ argonlab; Ar39 = P @ 8/19/13 1:33 PM @ argonlab; Ar38 …	Hole 29	APPLLPAAAAAA	1	Pychron Script	1	Fusions CO2	4	4	0	4	0	30	30	102			0	53.719
	123	4	4.24169	0.0154188	0.0135	0.65692	33.0897	99.9334	69.578	0.126045								61736-123	CM-Ash2	37	2013-08-16	16.9167	3459517000		Sanidine	29	Iain Mason		129.138.12.160	7.875	H2 Baseline = A @ 8/19/13 1:32 PM @ argonlab; H1 Baseline = A @ 8/19/13 1:32 PM @ argonlab; AX Baseline = A @ 8/19/13 1:32 PM @ argonlab; L1 Baseline = A @ 8/19/13 1:32 PM @ argonlab; L2 Baseline = A @ 8/19/13 1:32 PM @ argonlab; CDD Baseline = A @ 8/19/13 1:32 PM @ argonlab; Ar41 = A @ 8/19/13 1:32 PM @ argonlab; Ar40 = P @ 8/19/13 1:32 PM @ argonlab; Ar39 = P @ 8/19/13 1:32 PM @ argonlab; Ar38 …	Hole 29	APPLLPAAAAAA	1	Pychron Script	1	Fusions CO2	4	4	0	4	0	30	30	153			0	55.7296
	73	4	4.23197	0.0175588	-0.0247	0.7075	29.0569	100.206	69.6074	0.125674								61736-73	CM-Ash2	37	2013-08-16	6	3459478000		Sanidine	29	Iain Mason		129.138.12.160	7.875	H2 Baseline = A @ 8/19/13 1:33 PM @ argonlab; H1 Baseline = A @ 8/19/13 1:33 PM @ argonlab; AX Baseline = A @ 8/19/13 1:33 PM @ argonlab; L1 Baseline = A @ 8/19/13 1:33 PM @ argonlab; L2 Baseline = A @ 8/19/13 1:33 PM @ argonlab; CDD Baseline = A @ 8/19/13 1:33 PM @ argonlab; Ar41 = A @ 8/19/13 1:33 PM @ argonlab; Ar40 = P @ 8/19/13 1:33 PM @ argonlab; Ar39 = P @ 8/19/13 1:33 PM @ argonlab; Ar38 …	Hole 29	APPLLPAAAAAA	1	Pychron Script	1	Fusions CO2	4	4	0	4	0	30	30	103			0	59.8831
	28	4	4.24718	0.0025966	-0.00568965	0.902139	196.489	100.043	69.7407	0.176831								61736-28	CM-Ash2	37	2013-08-15	19.85	3459441000		Sanidine	29	Iain Mason		129.138.12.160	7.875	H2 Baseline = A @ 8/19/13 1:32 PM @ argonlab; H1 Baseline = A @ 8/19/13 1:32 PM @ argonlab; AX Baseline = A @ 8/19/13 1:32 PM @ argonlab; L1 Baseline = A @ 8/19/13 1:32 PM @ argonlab; L2 Baseline = A @ 8/19/13 1:32 PM @ argonlab; CDD Baseline = A @ 8/19/13 1:32 PM @ argonlab; Ar41 = A @ 8/19/13 1:32 PM @ argonlab; Ar40 = P @ 8/19/13 1:32 PM @ argonlab; Ar39 = P @ 8/19/13 1:32 PM @ argonlab; Ar38 …	Hole 29	APPLLPAAAAAA	1	Pychron Script	1	Fusions CO2	4	4	0	4	0	30	30	58			0	76.6311
	134	4	4.27901	0.0013024	0.0986	0.297187	391.741	99.3131	69.7516	0.363573								61736-134	CM-Ash2	37	2013-08-16	20.2333	3459529000		Sanidine	29	Iain Mason		129.138.12.160	7.875	H2 Baseline = A @ 8/19/13 1:32 PM @ argonlab; H1 Baseline = A @ 8/19/13 1:32 PM @ argonlab; AX Baseline = A @ 8/19/13 1:32 PM @ argonlab; L1 Baseline = A @ 8/19/13 1:32 PM @ argonlab; L2 Baseline = A @ 8/19/13 1:32 PM @ argonlab; CDD Baseline = A @ 8/19/13 1:32 PM @ argonlab; Ar41 = A @ 8/19/13 1:32 PM @ argonlab; Ar40 = P @ 8/19/13 1:32 PM @ argonlab; Ar39 = P @ 8/19/13 1:32 PM @ argonlab; Ar38 …	Hole 29	APPLLPAAAAAA	1	Pychron Script	1	Fusions CO2	4	4	0	4	0	30	30	164			0	25.4334
	85	4	4.25206	-0.0057067	-0.0051691	0.526305	-	100.024	69.8062	0.404441								61736-85	CM-Ash2	37	2013-08-16	8.8	3459488000		Sanidine	29	Iain Mason		129.138.12.160	7.875	H2 Baseline = A @ 8/19/13 1:33 PM @ argonlab; H1 Baseline = A @ 8/19/13 1:33 PM @ argonlab; AX Baseline = A @ 8/19/13 1:33 PM @ argonlab; L1 Baseline = A @ 8/19/13 1:33 PM @ argonlab; L2 Baseline = A @ 8/19/13 1:33 PM @ argonlab; CDD Baseline = A @ 8/19/13 1:33 PM @ argonlab; Ar41 = A @ 8/19/13 1:33 PM @ argonlab; Ar40 = P @ 8/19/13 1:33 PM @ argonlab; Ar39 = P @ 8/19/13 1:33 PM @ argonlab; Ar38 …	Hole 29	APPLLPAAAAAA	1	Pychron Script	1	Fusions CO2	4	4	0	4	0	30	30	115			0	44.7575
	40	4	4.24629	0.0164984	-0.0301	0.57781	30.9245	100.241	69.8624	0.460854								61736-40	CM-Ash2	37	2013-08-15	22.0833	3459449000		Sanidine	29	Iain Mason		129.138.12.160	7.875	H2 Baseline = A @ 8/19/13 1:32 PM @ argonlab; H1 Baseline = A @ 8/19/13 1:32 PM @ argonlab; AX Baseline = A @ 8/19/13 1:32 PM @ argonlab; L1 Baseline = A @ 8/19/13 1:32 PM @ argonlab; L2 Baseline = A @ 8/19/13 1:32 PM @ argonlab; CDD Baseline = A @ 8/19/13 1:32 PM @ argonlab; Ar41 = A @ 8/19/13 1:32 PM @ argonlab; Ar40 = P @ 8/19/13 1:32 PM @ argonlab; Ar39 = P @ 8/19/13 1:32 PM @ argonlab; Ar38 …	Hole 29	APPLLPAAAAAA	1	Pychron Script	1	Fusions CO2	4	4	0	4	0	30	30	70			0	49.0716
	82	4	4.27588	0.0100481	0.0669	0.899355	50.7762	99.5485	69.8641	0.272121								61736-82	CM-Ash2	37	2013-08-16	8.06667	3459485000		Sanidine	29	Iain Mason		129.138.12.160	7.875	H2 Baseline = A @ 8/19/13 1:33 PM @ argonlab; H1 Baseline = A @ 8/19/13 1:33 PM @ argonlab; AX Baseline = A @ 8/19/13 1:33 PM @ argonlab; L1 Baseline = A @ 8/19/13 1:33 PM @ argonlab; L2 Baseline = A @ 8/19/13 1:33 PM @ argonlab; CDD Baseline = A @ 8/19/13 1:33 PM @ argonlab; Ar41 = A @ 8/19/13 1:33 PM @ argonlab; Ar40 = P @ 8/19/13 1:33 PM @ argonlab; Ar39 = P @ 8/19/13 1:33 PM @ argonlab; Ar38 …	Hole 29	APPLLPAAAAAA	1	Pychron Script	1	Fusions CO2	4	4	0	4	0	30	30	112			0	76.9113
	80	4	4.25359	0.0066838	-0.0152	0.683069	76.3344	100.116	69.8945	0.129568								61736-80	CM-Ash2	37	2013-08-16	7.85	3459484000		Sanidine	29	Iain Mason		129.138.12.160	7.875	H2 Baseline = A @ 8/19/13 1:33 PM @ argonlab; H1 Baseline = A @ 8/19/13 1:33 PM @ argonlab; AX Baseline = A @ 8/19/13 1:33 PM @ argonlab; L1 Baseline = A @ 8/19/13 1:33 PM @ argonlab; L2 Baseline = A @ 8/19/13 1:33 PM @ argonlab; CDD Baseline = A @ 8/19/13 1:33 PM @ argonlab; Ar41 = A @ 8/19/13 1:33 PM @ argonlab; Ar40 = P @ 8/19/13 1:33 PM @ argonlab; Ar39 = P @ 8/19/13 1:33 PM @ argonlab; Ar38 …	Hole 29	APPLLPAAAAAA	1	Pychron Script	1	Fusions CO2	4	4	0	4	0	30	30	110			0	58.1102
	127	4	4.26551	0.0171115	0.0151	1.19691	29.8164	99.9259	69.9571	0.146109								61736-127	CM-Ash2	37	2013-08-16	18.3167	3459522000		Sanidine	29	Iain Mason		129.138.12.160	7.875	H2 Baseline = A @ 8/19/13 1:32 PM @ argonlab; H1 Baseline = A @ 8/19/13 1:32 PM @ argonlab; AX Baseline = A @ 8/19/13 1:32 PM @ argonlab; L1 Baseline = A @ 8/19/13 1:32 PM @ argonlab; L2 Baseline = A @ 8/19/13 1:32 PM @ argonlab; CDD Baseline = A @ 8/19/13 1:32 PM @ argonlab; Ar41 = A @ 8/19/13 1:32 PM @ argonlab; Ar40 = P @ 8/19/13 1:32 PM @ argonlab; Ar39 = P @ 8/19/13 1:32 PM @ argonlab; Ar38 …	Hole 29	APPLLPAAAAAA	1	Pychron Script	1	Fusions CO2	4	4	0	4	0	30	30	157			0	102.11
	111	4	4.25676	0.0215694	-0.0201	0.580427	23.6541	100.18	69.9906	0.255371								61736-111	CM-Ash2	37	2013-08-16	14.4833	3459508000		Sanidine	29	Iain Mason		129.138.12.160	7.875	H2 Baseline = A @ 8/19/13 1:32 PM @ argonlab; H1 Baseline = A @ 8/19/13 1:32 PM @ argonlab; AX Baseline = A @ 8/19/13 1:32 PM @ argonlab; L1 Baseline = A @ 8/19/13 1:32 PM @ argonlab; L2 Baseline = A @ 8/19/13 1:32 PM @ argonlab; CDD Baseline = A @ 8/19/13 1:32 PM @ argonlab; Ar41 = A @ 8/19/13 1:32 PM @ argonlab; Ar40 = P @ 8/19/13 1:32 PM @ argonlab; Ar39 = P @ 8/19/13 1:32 PM @ argonlab; Ar38 …	Hole 29	APPLLPAAAAAA	1	Pychron Script	1	Fusions CO2	4	4	0	4	0	30	30	141			0	49.4155
	88	4	4.26472	0.0026026	0.0014077	0.540412	196.036	99.9946	69.9908	0.448455								61736-88	CM-Ash2	37	2013-08-16	9.31667	3459490000		Sanidine	29	Iain Mason		129.138.12.160	7.875	H2 Baseline = A @ 8/19/13 1:33 PM @ argonlab; H1 Baseline = A @ 8/19/13 1:33 PM @ argonlab; AX Baseline = A @ 8/19/13 1:33 PM @ argonlab; L1 Baseline = A @ 8/19/13 1:33 PM @ argonlab; L2 Baseline = A @ 8/19/13 1:33 PM @ argonlab; CDD Baseline = A @ 8/19/13 1:33 PM @ argonlab; Ar41 = A @ 8/19/13 1:33 PM @ argonlab; Ar40 = P @ 8/19/13 1:33 PM @ argonlab; Ar39 = P @ 8/19/13 1:33 PM @ argonlab; Ar38 …	Hole 29	APPLLPAAAAAA	1	Pychron Script	1	Fusions CO2	4	4	0	4	0	30	30	118			0	46.0942
	97	4	4.27688	0.0280546	0.0308	0.425719	18.1861	99.8354	70.0784	0.27612								61736-97	CM-Ash2	37	2013-08-16	11.4	3459497000		Sanidine	29	Iain Mason		129.138.12.160	7.875	H2 Baseline = A @ 8/19/13 1:33 PM @ argonlab; H1 Baseline = A @ 8/19/13 1:33 PM @ argonlab; AX Baseline = A @ 8/19/13 1:33 PM @ argonlab; L1 Baseline = A @ 8/19/13 1:33 PM @ argonlab; L2 Baseline = A @ 8/19/13 1:33 PM @ argonlab; CDD Baseline = A @ 8/19/13 1:33 PM @ argonlab; Ar41 = A @ 8/19/13 1:33 PM @ argonlab; Ar40 = P @ 8/19/13 1:33 PM @ argonlab; Ar39 = P @ 8/19/13 1:33 PM @ argonlab; Ar38 …	Hole 29	APPLLPAAAAAA	1	Pychron Script	1	Fusions CO2	4	4	0	4	0	30	30	127			0	36.4156
	07	4	4.3332	0.0059534	0.1914	0.502564	85.6996	98.6929	70.1873	0.59619								61736-07	CM-Ash2	37	2013-08-15	15.2833	3459425000		Sanidine	29	Iain Mason		129.138.12.160	7.875	H2 Baseline = A @ 8/19/13 1:32 PM @ argonlab; H1 Baseline = A @ 8/19/13 1:32 PM @ argonlab; AX Baseline = A @ 8/19/13 1:32 PM @ argonlab; L1 Baseline = A @ 8/19/13 1:32 PM @ argonlab; L2 Baseline = A @ 8/19/13 1:32 PM @ argonlab; CDD Baseline = A @ 8/19/13 1:32 PM @ argonlab; Ar41 = A @ 8/19/13 1:32 PM @ argonlab; Ar40 = P @ 8/19/13 1:32 PM @ argonlab; Ar39 = P @ 8/19/13 1:32 PM @ argonlab; Ar38 …	Hole 29	APPLLPAAAAAA	1	Pychron Script	1	Fusions CO2	4	4	0	4	0	30	30	37			0	43.5544
	87	4	4.28307	0.0296786	0.0181	0.960629	17.191	99.9232	70.2388	0.287096								61736-87	CM-Ash2	37	2013-08-16	9.21667	3459489000		Sanidine	29	Iain Mason		129.138.12.160	7.875	H2 Baseline = A @ 8/19/13 1:33 PM @ argonlab; H1 Baseline = A @ 8/19/13 1:33 PM @ argonlab; AX Baseline = A @ 8/19/13 1:33 PM @ argonlab; L1 Baseline = A @ 8/19/13 1:33 PM @ argonlab; L2 Baseline = A @ 8/19/13 1:33 PM @ argonlab; CDD Baseline = A @ 8/19/13 1:33 PM @ argonlab; Ar41 = A @ 8/19/13 1:33 PM @ argonlab; Ar40 = P @ 8/19/13 1:33 PM @ argonlab; Ar39 = P @ 8/19/13 1:33 PM @ argonlab; Ar38 …	Hole 29	APPLLPAAAAAA	1	Pychron Script	1	Fusions CO2	4	4	0	4	0	30	30	117			0	82.2904
	89	4	4.2976	0.0151538	0.0233	1.15815	33.6684	99.8683	70.4343	0.204782								61736-89	CM-Ash2	37	2013-08-16	9.41667	3459490000		Sanidine	29	Iain Mason		129.138.12.160	7.875	H2 Baseline = A @ 8/19/13 1:33 PM @ argonlab; H1 Baseline = A @ 8/19/13 1:33 PM @ argonlab; AX Baseline = A @ 8/19/13 1:33 PM @ argonlab; L1 Baseline = A @ 8/19/13 1:33 PM @ argonlab; L2 Baseline = A @ 8/19/13 1:33 PM @ argonlab; CDD Baseline = A @ 8/19/13 1:33 PM @ argonlab; Ar41 = A @ 8/19/13 1:33 PM @ argonlab; Ar40 = P @ 8/19/13 1:33 PM @ argonlab; Ar39 = P @ 8/19/13 1:33 PM @ argonlab; Ar38 …	Hole 29	APPLLPAAAAAA	1	Pychron Script	1	Fusions CO2	4	4	0	4	0	30	30	119			0	99.5464
	22	4	4.27261	6.57e-05	-0.0694	0.960303	7765.66	100.485	70.4552	0.316509								61736-22	CM-Ash2	37	2013-08-15	18.15	3459435000		Sanidine	29	Iain Mason		129.138.12.160	7.875	H2 Baseline = A @ 8/19/13 1:32 PM @ argonlab; H1 Baseline = A @ 8/19/13 1:32 PM @ argonlab; AX Baseline = A @ 8/19/13 1:32 PM @ argonlab; L1 Baseline = A @ 8/19/13 1:32 PM @ argonlab; L2 Baseline = A @ 8/19/13 1:32 PM @ argonlab; CDD Baseline = A @ 8/19/13 1:32 PM @ argonlab; Ar41 = A @ 8/19/13 1:32 PM @ argonlab; Ar40 = P @ 8/19/13 1:32 PM @ argonlab; Ar39 = P @ 8/19/13 1:32 PM @ argonlab; Ar38 …	Hole 29	APPLLPAAAAAA	1	Pychron Script	1	Fusions CO2	4	4	0	4	0	30	30	52			0	82.06
	68	4	4.4107	0.0626304	0.3599	0.0742251	8.14627	97.661	70.6906	2.08595								61736-68	CM-Ash2	37	2013-08-16	4.61667	3459473000		Sanidine	29	Iain Mason		129.138.12.160	7.875	H2 Baseline = A @ 8/19/13 1:32 PM @ argonlab; H1 Baseline = A @ 8/19/13 1:32 PM @ argonlab; AX Baseline = A @ 8/19/13 1:32 PM @ argonlab; L1 Baseline = A @ 8/19/13 1:32 PM @ argonlab; L2 Baseline = A @ 8/19/13 1:32 PM @ argonlab; CDD Baseline = A @ 8/19/13 1:32 PM @ argonlab; Ar41 = A @ 8/19/13 1:32 PM @ argonlab; Ar40 = P @ 8/19/13 1:32 PM @ argonlab; Ar39 = P @ 8/19/13 1:32 PM @ argonlab; Ar38 …	Hole 29	APPLLPAAAAAA	1	Pychron Script	1	Fusions CO2	4	4	0	4	0	30	30	98			0	6.54796
	106	4	4.33083	0.0119973	0.0289	0.884751	42.5266	99.8179	70.9342	0.328106								61736-106	CM-Ash2	37	2013-08-16	13.2333	3459504000		Sanidine	29	Iain Mason		129.138.12.160	7.875	H2 Baseline = A @ 8/19/13 1:32 PM @ argonlab; H1 Baseline = A @ 8/19/13 1:32 PM @ argonlab; AX Baseline = A @ 8/19/13 1:32 PM @ argonlab; L1 Baseline = A @ 8/19/13 1:32 PM @ argonlab; L2 Baseline = A @ 8/19/13 1:32 PM @ argonlab; CDD Baseline = A @ 8/19/13 1:32 PM @ argonlab; Ar41 = A @ 8/19/13 1:32 PM @ argonlab; Ar40 = P @ 8/19/13 1:32 PM @ argonlab; Ar39 = P @ 8/19/13 1:32 PM @ argonlab; Ar38 …	Hole 29	APPLLPAAAAAA	1	Pychron Script	1	Fusions CO2	4	4	0	4	0	30	30	136			0	76.6347
	93	4	4.33113	0.0288741	0.021	0.345722	17.67	99.9072	71.0019	0.72138								61736-93	CM-Ash2	37	2013-08-16	10.4667	3459494000		Sanidine	29	Iain Mason		129.138.12.160	7.875	H2 Baseline = A @ 8/19/13 1:33 PM @ argonlab; H1 Baseline = A @ 8/19/13 1:33 PM @ argonlab; AX Baseline = A @ 8/19/13 1:33 PM @ argonlab; L1 Baseline = A @ 8/19/13 1:33 PM @ argonlab; L2 Baseline = A @ 8/19/13 1:33 PM @ argonlab; CDD Baseline = A @ 8/19/13 1:33 PM @ argonlab; Ar41 = A @ 8/19/13 1:33 PM @ argonlab; Ar40 = P @ 8/19/13 1:33 PM @ argonlab; Ar39 = P @ 8/19/13 1:33 PM @ argonlab; Ar38 …	Hole 29	APPLLPAAAAAA	1	Pychron Script	1	Fusions CO2	4	4	0	4	0	30	30	123			0	29.9479
	30	4	4.38344	-0.0347849	0.0633	0.778102	-	99.5074	71.5594	0.400322								61736-30	CM-Ash2	37	2013-08-15	20.0667	3459442000		Sanidine	29	Iain Mason		129.138.12.160	7.875	H2 Baseline = A @ 8/19/13 1:32 PM @ argonlab; H1 Baseline = A @ 8/19/13 1:32 PM @ argonlab; AX Baseline = A @ 8/19/13 1:32 PM @ argonlab; L1 Baseline = A @ 8/19/13 1:32 PM @ argonlab; L2 Baseline = A @ 8/19/13 1:32 PM @ argonlab; CDD Baseline = A @ 8/19/13 1:32 PM @ argonlab; Ar41 = A @ 8/19/13 1:32 PM @ argonlab; Ar40 = P @ 8/19/13 1:32 PM @ argonlab; Ar39 = P @ 8/19/13 1:32 PM @ argonlab; Ar38 …	Hole 29	APPLLPAAAAAA	1	Pychron Script	1	Fusions CO2	4	4	0	4	0	30	30	60			0	68.2136
	41	4	4.45667	0.0064804	-0.0214	1.11926	78.7303	100.153	73.1982	0.27789								61736-41	CM-Ash2	37	2013-08-15	22.1833	3459450000		Sanidine	29	Iain Mason		129.138.12.160	7.875	H2 Baseline = A @ 8/19/13 1:32 PM @ argonlab; H1 Baseline = A @ 8/19/13 1:32 PM @ argonlab; AX Baseline = A @ 8/19/13 1:32 PM @ argonlab; L1 Baseline = A @ 8/19/13 1:32 PM @ argonlab; L2 Baseline = A @ 8/19/13 1:32 PM @ argonlab; CDD Baseline = A @ 8/19/13 1:32 PM @ argonlab; Ar41 = A @ 8/19/13 1:32 PM @ argonlab; Ar40 = P @ 8/19/13 1:32 PM @ argonlab; Ar39 = P @ 8/19/13 1:32 PM @ argonlab; Ar38 …	Hole 29	APPLLPAAAAAA	1	Pychron Script	1	Fusions CO2	4	4	0	4	0	30	30	71			0	99.7638
	100	4	4.50719	0.0220813	0.1511	1.41181	23.1057	99.0392	73.2065	0.18564								61736-100	CM-Ash2	37	2013-08-16	12.15	3459500000		Sanidine	29	Iain Mason		129.138.12.160	7.875	H2 Baseline = A @ 8/19/13 1:32 PM @ argonlab; H1 Baseline = A @ 8/19/13 1:32 PM @ argonlab; AX Baseline = A @ 8/19/13 1:32 PM @ argonlab; L1 Baseline = A @ 8/19/13 1:32 PM @ argonlab; L2 Baseline = A @ 8/19/13 1:32 PM @ argonlab; CDD Baseline = A @ 8/19/13 1:32 PM @ argonlab; Ar41 = A @ 8/19/13 1:32 PM @ argonlab; Ar40 = P @ 8/19/13 1:32 PM @ argonlab; Ar39 = P @ 8/19/13 1:32 PM @ argonlab; Ar38 …	Hole 29	APPLLPAAAAAA	1	Pychron Script	1	Fusions CO2	4	4	0	4	0	30	30	130			0	127.268
	35	4	4.50012	-0.0113299	0.0507	0.784539	-	99.6434	73.5292	0.404911								61736-35	CM-Ash2	37	2013-08-15	20.5833	3459444000		Sanidine	29	Iain Mason		129.138.12.160	7.875	H2 Baseline = A @ 8/19/13 1:32 PM @ argonlab; H1 Baseline = A @ 8/19/13 1:32 PM @ argonlab; AX Baseline = A @ 8/19/13 1:32 PM @ argonlab; L1 Baseline = A @ 8/19/13 1:32 PM @ argonlab; L2 Baseline = A @ 8/19/13 1:32 PM @ argonlab; CDD Baseline = A @ 8/19/13 1:32 PM @ argonlab; Ar41 = A @ 8/19/13 1:32 PM @ argonlab; Ar40 = P @ 8/19/13 1:32 PM @ argonlab; Ar39 = P @ 8/19/13 1:32 PM @ argonlab; Ar38 …	Hole 29	APPLLPAAAAAA	1	Pychron Script	1	Fusions CO2	4	4	0	4	0	30	30	65			0	70.6098
	146	4	4.52226	0.0466988	0.1007	0.505001	10.9254	99.4109	73.7182	0.582802								61736-146	CM-Ash2	37	2013-08-16	23.8833	3459542000		Sanidine	29	Iain Mason		129.138.12.160	7.875	H2 Baseline = A @ 8/19/13 1:32 PM @ argonlab; H1 Baseline = A @ 8/19/13 1:32 PM @ argonlab; AX Baseline = A @ 8/19/13 1:32 PM @ argonlab; L1 Baseline = A @ 8/19/13 1:32 PM @ argonlab; L2 Baseline = A @ 8/19/13 1:32 PM @ argonlab; CDD Baseline = A @ 8/19/13 1:32 PM @ argonlab; Ar41 = A @ 8/19/13 1:32 PM @ argonlab; Ar40 = P @ 8/19/13 1:32 PM @ argonlab; Ar39 = P @ 8/19/13 1:32 PM @ argonlab; Ar38 …	Hole 29	APPLLPAAAAAA	1	Pychron Script	1	Fusions CO2	4	4	0	4	0	30	30	176			0	45.6764
	70	4	4.50556	0.0100327	0.0176	1.26679	50.8541	99.9026	73.8052	0.236398								61736-70	CM-Ash2	37	2013-08-16	5.05	3459474000		Sanidine	29	Iain Mason		129.138.12.160	7.875	H2 Baseline = A @ 8/19/13 1:32 PM @ argonlab; H1 Baseline = A @ 8/19/13 1:32 PM @ argonlab; AX Baseline = A @ 8/19/13 1:32 PM @ argonlab; L1 Baseline = A @ 8/19/13 1:32 PM @ argonlab; L2 Baseline = A @ 8/19/13 1:32 PM @ argonlab; CDD Baseline = A @ 8/19/13 1:32 PM @ argonlab; Ar41 = A @ 8/19/13 1:32 PM @ argonlab; Ar40 = P @ 8/19/13 1:32 PM @ argonlab; Ar39 = P @ 8/19/13 1:32 PM @ argonlab; Ar38 …	Hole 29	APPLLPAAAAAA	1	Pychron Script	1	Fusions CO2	4	4	0	4	0	30	30	100			0	114.153
	26	4	4.54859	0.0187061	0.1458	0.731238	27.2747	99.0758	73.8933	0.441115								61736-26	CM-Ash2	37	2013-08-15	18.9833	3459438000		Sanidine	29	Iain Mason		129.138.12.160	7.875	H2 Baseline = A @ 8/19/13 1:32 PM @ argonlab; H1 Baseline = A @ 8/19/13 1:32 PM @ argonlab; AX Baseline = A @ 8/19/13 1:32 PM @ argonlab; L1 Baseline = A @ 8/19/13 1:32 PM @ argonlab; L2 Baseline = A @ 8/19/13 1:32 PM @ argonlab; CDD Baseline = A @ 8/19/13 1:32 PM @ argonlab; Ar41 = A @ 8/19/13 1:32 PM @ argonlab; Ar40 = P @ 8/19/13 1:32 PM @ argonlab; Ar39 = P @ 8/19/13 1:32 PM @ argonlab; Ar38 …	Hole 29	APPLLPAAAAAA	1	Pychron Script	1	Fusions CO2	4	4	0	4	0	30	30	56			0	66.523
	56	4	4.5607	0.0247003	0.1707	0.397356	20.6558	98.9222	73.9741	0.713144								61736-56	CM-Ash2	37	2013-08-16	1.63333	3459462000		Sanidine	29	Iain Mason		129.138.12.160	7.875	H2 Baseline = A @ 8/19/13 1:32 PM @ argonlab; H1 Baseline = A @ 8/19/13 1:32 PM @ argonlab; AX Baseline = A @ 8/19/13 1:32 PM @ argonlab; L1 Baseline = A @ 8/19/13 1:32 PM @ argonlab; L2 Baseline = A @ 8/19/13 1:32 PM @ argonlab; CDD Baseline = A @ 8/19/13 1:32 PM @ argonlab; Ar41 = A @ 8/19/13 1:32 PM @ argonlab; Ar40 = P @ 8/19/13 1:32 PM @ argonlab; Ar39 = P @ 8/19/13 1:32 PM @ argonlab; Ar38 …	Hole 29	APPLLPAAAAAA	1	Pychron Script	1	Fusions CO2	4	4	0	4	0	30	30	86			0	36.2451
	129	4	4.51868	0.0354045	0.0302	0.584135	14.4107	99.8615	73.9875	0.480417								61736-129	CM-Ash2	37	2013-08-16	18.7333	3459523000		Sanidine	29	Iain Mason		129.138.12.160	7.875	H2 Baseline = A @ 8/19/13 1:32 PM @ argonlab; H1 Baseline = A @ 8/19/13 1:32 PM @ argonlab; AX Baseline = A @ 8/19/13 1:32 PM @ argonlab; L1 Baseline = A @ 8/19/13 1:32 PM @ argonlab; L2 Baseline = A @ 8/19/13 1:32 PM @ argonlab; CDD Baseline = A @ 8/19/13 1:32 PM @ argonlab; Ar41 = A @ 8/19/13 1:32 PM @ argonlab; Ar40 = P @ 8/19/13 1:32 PM @ argonlab; Ar39 = P @ 8/19/13 1:32 PM @ argonlab; Ar38 …	Hole 29	APPLLPAAAAAA	1	Pychron Script	1	Fusions CO2	4	4	0	4	0	30	30	159			0	52.7916
	33	4	4.52636	-0.0174198	0.0344	0.775256	-	99.7413	74.0211	0.407564								61736-33	CM-Ash2	37	2013-08-15	20.3667	3459443000		Sanidine	29	Iain Mason		129.138.12.160	7.875	H2 Baseline = A @ 8/19/13 1:32 PM @ argonlab; H1 Baseline = A @ 8/19/13 1:32 PM @ argonlab; AX Baseline = A @ 8/19/13 1:32 PM @ argonlab; L1 Baseline = A @ 8/19/13 1:32 PM @ argonlab; L2 Baseline = A @ 8/19/13 1:32 PM @ argonlab; CDD Baseline = A @ 8/19/13 1:32 PM @ argonlab; Ar41 = A @ 8/19/13 1:32 PM @ argonlab; Ar40 = P @ 8/19/13 1:32 PM @ argonlab; Ar39 = P @ 8/19/13 1:32 PM @ argonlab; Ar38 …	Hole 29	APPLLPAAAAAA	1	Pychron Script	1	Fusions CO2	4	4	0	4	0	30	30	63			0	70.181
[truncated: 1,170 more rows]
[truncated: 141 more columns]
